# Supplementary material for: Insights into chemoselectivity principles in metal oxide affinity chromatography using tailored nanocast metal oxide microspheres and mass spectrometry-based phosphoproteomics
Source: Royal Society of Chemistry journal article supplement (doi:10.1039/c7an00570a), 2017-01-01
Supplement: c7an00570a2.xlsx [file c7an00570a2.xlsx]

## Sheet: Table S1
ESI Table S1. Detailed results of phosphopeptide enrichment experiments from digested HEK lysate. Shown are the numbers of identified peptides for every single injection and specificities based on peptide counts and peak areas.
With the exception of the "localized phosphopeptides" count, the numbers refer to stripped peptide sequences where only one phosphorylation site localization was counted per phosphorylation state (see details in the methods section of the main text).
	Replicates			Peptide counts				Specificity based on ...			Multiply phosphorylated peptides
Material	Enrichment	MS analysis		All peptides	Nonphosphop.	Phosphopeptides		Peptide counts	Peak areas		2P	%	3P	%	4P	%
ZrO2 +LA	1	1		5888	2182	3706		62.9416	82.7425		515	13.8964	91	2.45548	8	0.215866
ZrO2 +LA	1	2		5882	2170	3712		63.1078	81.7058		510	13.7392	94	2.53233	6	0.161638
ZrO2 +LA	2	1		5488	1970	3518		64.1035	84.1539		484	13.7578	93	2.64355	6	0.170551
ZrO2 +LA	2	2		5451	1701	3496		64.135	86.1484		473	13.5297	92	2.63158	5	0.143021
ZrO2 +LA	3	1		5633	2058	3575		63.4653	83.5777		501	14.014	84	2.34965	6	0.167832
ZrO2 +LA	3	2		5658	2075	3583		63.3263	82.2506		488	13.6199	93	2.59559	4	0.111638
	MEAN			5666.67	2026	3598.33		63.5	83.43		495	13.7564	91	2.52895	6	0.166744
	STANDARD DEVIATION			170.782	161.894	83.8822
	COEFFICIENT OF VARIATION (%)			3.0138	7.99082	2.33114
	WHOLE DATA SET			6567	2395	4172		63.5298			579	13.8782	114	2.7325	13	0.311601
	LOCALIZED PHOSPHOPEPTIDES					3758					485	12.9058	80	2.12879	9	0.239489
TiO2 TSP +LA	1	1		3462	249	3213		92.8076	97.7859		592	18.4251	94	2.92561	7	0.217865
TiO2 TSP +LA	1	2		3608	232	3376		93.5698	98.0386		629	18.6315	99	2.93246	7	0.207346
TiO2 TSP +LA	2	1		3888	234	3654		93.9815	97.6044		671	18.3634	108	2.95567	12	0.328407
TiO2 TSP +LA	2	2		3871	232	3639		94.0067	97.6849		675	18.5491	105	2.88541	10	0.274801
TiO2 TSP +LA	3	1		3456	208	3248		93.9815	98.0378		604	18.5961	98	3.01724	7	0.215517
TiO2 TSP +LA	3	2		3494	208	3286		94.0469	97.8614		617	18.7766	101	3.07365	9	0.273889
	MEAN			3629.83	227.167	3402.67		93.7417	97.84		631	18.5443	101	2.96826	9	0.264498
	STANDARD DEVIATION			201.06	16.1545	196.591
	COEFFICIENT OF VARIATION (%)			5.53909	7.11128	5.77755
	WHOLE DATA SET			4456	309	4147		93.0655			766	18.4712	126	3.03834	14	0.337593
	LOCALIZED PHOSPHOPEPTIDES					3648					637	17.4616	89	2.43969	8	0.219298
In2O3 +LA	1	1		3843	323	3520		91.5951	97.3694		641	18.2102	128	3.63636	18	0.511364
In2O3 +LA	1	2		3864	328	3536		91.5114	97.4407		644	18.2127	136	3.84615	16	0.452489
In2O3 +LA	2	1		3935	321	3614		91.8424	97.9096		668	18.4837	137	3.79081	21	0.581074
In2O3 +LA	2	2		3940	322	3618		91.8274	97.7523		665	18.3803	139	3.8419	19	0.525152
In2O3 +LA	3	1		4035	322	3713		92.0198	97.7008		668	17.9908	139	3.7436	19	0.511716
In2O3 +LA	3	2		3989	320	3669		91.9779	97.7196		670	18.2611	138	3.76124	19	0.517852
	MEAN			3934.33	322.667	3611.67		91.7987	97.65		659	18.2464	136	3.76557	19	0.526073
	STANDARD DEVIATION			72.7232	2.80476	74.4706
	COEFFICIENT OF VARIATION (%)			1.84843	0.869243	2.06194
	WHOLE DATA SET			4447	356	4091		91.9946			754	18.4307	163	3.98436	27	0.659985
	LOCALIZED PHOSPHOPEPTIDES					3626					633	17.4573	109	3.00607	14	0.3861
TiO2 +LA	1	1		5768	2798	2970		51.491	64.2489		453	15.2525	83	2.79461	5	0.16835
TiO2 +LA	1	2		5725	2773	2952		51.5633	65.1247		446	15.1084	85	2.8794	5	0.169377
TiO2 +LA	2	1		6138	2852	3286		53.5354	68.4195		504	15.3378	93	2.83019	6	0.182593
TiO2 +LA	2	2		6083	2824	3259		53.5755	67.4901		485	14.8819	93	2.85364	5	0.153421
TiO2 +LA	3	1		5920	2708	3212		54.2568	68.6093		487	15.1619	92	2.86426	7	0.217933
TiO2 +LA	3	2		5850	2670	3180		54.359	67.2712		496	15.5975	97	3.05031	5	0.157233
	MEAN			5914	2770.83	3143.17		53.1479	66.86		479	15.2394	91	2.89517	6	0.19089
	STANDARD DEVIATION			167.276	69.6747	145.907
	COEFFICIENT OF VARIATION (%)			2.82847	2.51458	4.64205
	WHOLE DATA SET			6928	3249	3679		53.1033			572	15.5477	114	3.09867	10	0.271813
	LOCALIZED PHOSPHOEPEPTIDES					3226					494	15.3131	81	2.51085	2	0.0619963
Fe2O3 +LA	1	1		3186	233	2953		92.6868	98.2135		711	24.0772	138	4.67321	12	0.406366
Fe2O3 +LA	1	2		3293	246	2997		91.0112	98.0691		724	24.1575	140	4.67134	13	0.433767
Fe2O3 +LA	2	1		3238	251	2987		92.2483	98.1178		724	24.2384	138	4.62002	15	0.502176
Fe2O3 +LA	2	2		3211	247	2964		92.3077	98.0403		724	24.4265	139	4.68961	19	0.641026
Fe2O3 +LA	3	1		3451	253	3198		92.6688	98.3496		784	24.5153	154	4.81551	17	0.531582
Fe2O3 +LA	3	2		3496	256	3240		92.6773	98.2915		785	24.2284	163	5.03086	22	0.679012
	MEAN			3312.5	247.667	3056.5		92.2717	98.18		742	24.2761	145	4.74399	16	0.523475
	STANDARD DEVIATION			130.453	8.09115	127.541
	COEFFICIENT OF VARIATION (%)			3.93819	3.26695	4.17278
	WHOLE DATA SET			3922	300	3622		92.3508			881	24.3236	182	5.02485	26	0.717835
	LOCALIZED PHOSPHOPEPTIDES					3212					740	23.0386	130	4.04732	13	0.404732
NiO -LA	1	1		8628	6310	2318		26.866	26.5554		341	14.711	63	2.71786	9	0.388266
NiO -LA	1	2		8559	6247	2312		27.0125	25.8072		351	15.1817	63	2.72491	10	0.432526
NiO -LA	2	1		8443	6167	2276		26.9572	26.9522		345	15.1582	68	2.9877	10	0.439367
NiO -LA	2	2		8472	6214	2258		26.6525	27.252		334	14.7919	57	2.52436	7	0.310009
NiO -LA	3	1		8655	6371	2284		26.3894	28.9295		339	14.8424	65	2.84588	5	0.218914
NiO -LA	3	2		8538	6276	2262		26.4933	28.5423		338	14.9425	60	2.65252	11	0.486295
	MEAN			8549.17	6264.17	2285		26.7278	27.34		341	14.9234	63	2.75711	9	0.393873
	STANDARD DEVIATION			83.5019	71.9817	25.1317
	COEFFICIENT OF VARIATION (%)			0.976726	1.1491	1.09985
	WHOLE DATA SET			9867	7207	2660		26.9585			414	15.5639	85	3.19549	14	0.526316
	LOCALIZED PHOSPHOPEPTIDES					2299					333	14.4846	56	2.43584	9	0.391475
SnO2 +LA	1	1		3919	2541	1378		35.162	52.2927		275	19.9565	20	1.45138	0	0
SnO2 +LA	1	2		3684	2371	1313		35.6406	53.0113		263	20.0305	20	1.52323	0	0
SnO2 +LA	2	1		4453	2917	1536		34.4936	50.6493		308	20.0521	21	1.36719	0	0
SnO2 +LA	2	2		4406	2900	1506		34.1807	49.0582		306	20.3187	23	1.52722	0	0
SnO2 +LA	3	1		3620	2432	1188		32.8177	41.9695		219	18.4343	21	1.76768	0	0
SnO2 +LA	3	2		3574	2405	1169		32.7084	42.3459		216	18.4773	19	1.62532	1	0.0855432
	MEAN			3942.67	2594.33	1348.33		34.1985	48.22		265	19.6539	21	1.55748	0	0
	STANDARD DEVIATION			395.63	249.987	154.967
	COEFFICIENT OF VARIATION (%)			10.0346	9.63588	11.4932
	WHOLE DATA SET			5157	3411	1746		33.8569			347	19.874	30	1.71821	1	0.0572738
	LOCALIZED PHOSPHOPEPTIDES					1525					290	19.0164	22	1.44262	0	0
NiO +LA	1	1		2029	820	1209		59.586	87.1817		688	56.9065	130	10.7527	8	0.661704
NiO +LA	1	2		2077	838	1239		59.6533	87.3463		695	56.0936	132	10.6538	11	0.887813
NiO +LA	2	1		3272	2095	1177		35.9719	52.3929		648	55.0552	133	11.2999	12	1.01954
NiO +LA	2	2		3245	2096	1149		35.4083	54.7774		637	55.4395	132	11.4883	11	0.957354
NiO +LA	3	1		2679	1425	1254		46.8085	77.44		698	55.6619	156	12.4402	13	1.03668
NiO +LA	3	2		2529	1335	1194		47.2123	78.1616		679	56.8677	144	12.0603	10	0.837521
	MEAN			2638.5	1434.83	1203.67		45.6194	72.88		674	55.9956	138	11.465	11	0.913874
	STANDARD DEVIATION			542.138	568.727	38.9957
	COEFFICIENT OF VARIATION (%)			20.5472	39.6372	3.23974
	WHOLE DATA SET			3773	2269	1504		39.8622			831	55.2527	173	11.5027	19	1.2633
	LOCALIZED PHOSPHOPEPTIDES					1307					719	55.0115	131	10.023	13	0.994644
SnO2 -LA	1	1		13423	12333	1090		8.12039	7.56344		134	12.2936	29	2.66055	9	0.825688
SnO2 -LA	1	2		13089	12001	1088		8.31232	7.27738		128	11.7647	28	2.57353	8	0.735294
SnO2 -LA	2	1		13661	12552	1109		8.118	7.57912		135	12.1731	24	2.16411	6	0.541028
SnO2 -LA	2	2		13357	12281	1076		8.0557	7.22625		136	12.6394	25	2.32342	6	0.557621
SnO2 -LA	3	1		13345	12246	1099		8.23529	7.84421		136	12.3749	29	2.63876	8	0.727934
SnO2 -LA	3	2		13384	12275	1109		8.28601	7.81165		137	12.3535	24	2.16411	6	0.541028
	MEAN			13376.5	12281.3	1095.17		8.18724	7.55		134	12.2356	27	2.46538	7	0.639172
	STANDARD DEVIATION			182.859	176.525	12.9833
	COEFFICIENT OF VARIATION (%)			1.36702	1.43734	1.18551
	WHOLE DATA SET			15240	13970	1270		8.33333			162	12.7559	37	2.91339	10	0.787402
	LOCALIZED PHOSPHOPEPTIDES					1060					130	12.2642	19	1.79245	5	0.471698
Co3O4 +LA	1	1		1361	596	765		56.2087	84.2974		400	52.2876	107	13.9869	7	0.915033
Co3O4 +LA	1	2		1378	599	779		56.5312	86.2758		410	52.6316	113	14.5058	9	1.15533
Co3O4 +LA	2	1		1758	923	835		47.4972	73.524		424	50.7784	113	13.5329	11	1.31737
Co3O4 +LA	2	2		1746	915	831		47.5945	76.9437		428	51.5042	116	13.9591	11	1.32371
Co3O4 +LA	3	1		1703	813	890		52.2607	80.1492		458	51.4607	131	14.7191	11	1.23596
Co3O4 +LA	3	2		1611	785	826		51.2725	81.5842		432	52.3002	123	14.891	12	1.45278
	MEAN			1592.83	771.833	821		51.5434	80.46		425	51.7661	117	14.2509	10	1.21803
	STANDARD DEVIATION			180.614	145.606	44.6811
	COEFFICIENT OF VARIATION (%)			11.3392	18.8649	5.44228
	WHOLE DATA SET			2056	1012	1044		50.7782			534	51.1494	158	15.1341	16	1.53257
	LOCALIZED PHOSPHOPEPTIDES					889					453	50.9561	112	12.5984	7	0.787402
Co3O4 -LA	1	1		14237	13345	892		6.26536	6.20549		156	17.4888	32	3.58744	7	0.784753
Co3O4 -LA	1	2		14302	13403	899		6.28583	6.71928		155	17.2414	35	3.89321	5	0.556174
Co3O4 -LA	2	1		14469	13579	890		6.15108	4.87162		157	17.6404	33	3.70787	6	0.674157
Co3O4 -LA	2	2		14472	13574	898		6.20509	4.80128		163	18.1514	29	3.2294	8	0.890869
Co3O4 -LA	3	1		14125	13240	885		6.26549	5.60899		159	17.9661	39	4.40678	8	0.903955
Co3O4 -LA	3	2		13887	13014	873		6.28645	5.58672		151	17.2967	38	4.35281	5	0.572738
	MEAN			14248.7	13359.2	889.5		6.24269	5.63		157	17.6504	34	3.82237	7	0.786959
	STANDARD DEVIATION			222.487	214.449	9.60729
	COEFFICIENT OF VARIATION (%)			1.56146	1.60526	1.08008
	WHOLE DATA SET			16618	15540	1078		6.48694			202	18.7384	48	4.45269	9	0.834879
	LOCALIZED PHOSPHOPEPTIDES					862					147	17.0534	33	3.82831	4	0.464037
