# Supplementary material for: Insights into chemoselectivity principles in metal oxide affinity chromatography using tailored nanocast metal oxide microspheres and mass spectrometry-based phosphoproteomics
Source: Royal Society of Chemistry journal article supplement (doi:10.1039/c7an00570a), 2017-01-01
Supplement: c7an00570a3.xlsx [file c7an00570a3.xlsx]

## Sheet: Table S2
ESI Table S2. List of all identified phosphopeptides enriched from digested HEK lysate with different metal oxide materials.
NOTE: The column "Min. localization" refers to the n-th highest site localization reliability for a phosphorylation site, where n is the number of phosphorylation sites.
For example, if the value is 0.95 for a triply phosphorylated peptide, then all phosphorylation sites were assigned with a probability of at least 0.95.
ZrO2 +LA (3758)					TiO2 TSP +LA (3648)					In2O3 +LA (3626)					TiO2 +LA (3226)					Fe2O3 +LA (3212)					NiO -LA (2299)					SnO2 +LA (1525)					NiO +LA (1307)					SnO2 -LA (1060)					Co3O4 +LA (889)
Sequence	Modification	Parent protein	Min. localization		Sequence	Modification	Parent protein	Min. localization		Sequence	Modification	Parent protein	Min. localization		Sequence	Modification	Parent protein	Min. localization		Sequence	Modification	Parent protein	Min. localization		Sequence	Modification	Parent protein	Min. localization		Sequence	Modification	Parent protein	Min. localization		Sequence	Modification	Parent protein	Min. localization		Sequence	Modification	Parent protein	Min. localization		Sequence	Modification	Parent protein	Min. localization
_AAAAAATAPPS(ph)PGPAQPGPR_	Phospho (STY)	sp|Q6SPF0|SAMD1_HUMAN	1		_AAAAGLGHPAS(ph)PGGS(ph)EDGPPGSEEEDAAR_	Phospho (STY)	sp|Q99856|ARI3A_HUMAN	0.999		_AAAAAATAPPS(ph)PGPAQPGPR_	Phospho (STY)	sp|Q6SPF0|SAMD1_HUMAN	1		_AAAAAATAPPS(ph)PGPAQPGPR_	Phospho (STY)	sp|Q6SPF0|SAMD1_HUMAN	1		_AAAAAATAPPS(ph)PGPAQPGPR_	Phospho (STY)	sp|Q6SPF0|SAMD1_HUMAN	1		_AAAAAATAPPS(ph)PGPAQPGPR_	Phospho (STY)	sp|Q6SPF0|SAMD1_HUMAN	1		_AAAT(ph)PESQEPQAK_	Phospho (STY)	sp|P49006|MRP_HUMAN	1		_AAAAGLGHPAS(ph)PGGS(ph)EDGPPGSEEEDAAR_	2 Phospho (STY)	sp|Q99856|ARI3A_HUMAN	0.999		_AAAT(ph)PESQEPQAK_	Phospho (STY)	sp|P49006|MRP_HUMAN	1		_AAAYDIS(ph)EDEED_	Phospho (STY)	sp|P49585|PCY1A_HUMAN	1
_AAAAPGASPS(ph)PGGDAAWSEAGPGPRPLAR_	Phospho (STY)	sp|P52701|MSH6_HUMAN	0.977		_AAAT(ph)PESQEPQAK_	Phospho (STY)	sp|P49006|MRP_HUMAN	1		_AAAAGLGHPAS(ph)PGGS(ph)EDGPPGSEEEDAAR_	2 Phospho (STY)	sp|Q99856|ARI3A_HUMAN	0.999		_AAAAGLGHPAS(ph)PGGSEDGPPGSEEEDAAR_	Phospho (STY)	sp|Q99856|ARI3A_HUMAN	0.929		_AAAAGLGHPAS(ph)PGGS(ph)EDGPPGSEEEDAAR_	2 Phospho (STY)	sp|Q99856|ARI3A_HUMAN	1		_AAAAGLGHPAS(ph)PGGSEDGPPGSEEEDAAR_	Phospho (STY)	sp|Q99856|ARI3A_HUMAN	0.993		_AADS(ph)DDGAVSAPAASDGGVSK_	Phospho (STY)	sp|Q96GM8|TOE1_HUMAN	1		_AAAAGLGHPAS(ph)PGGSEDGPPGS(ph)EEEDAAR_	2 Phospho (STY)	sp|Q99856|ARI3A_HUMAN	0.946		_AADPPAENSS(ph)APEAEQGGAE_	Phospho (STY)	sp|P67809|YBOX1_HUMAN	0.946		_AADPPAENSS(ph)APEAEQGGAE_	Phospho (STY)	sp|P67809|YBOX1_HUMAN	0.981
_AAAT(ph)PESQEPQAK_	Phospho (STY)	sp|P49006|MRP_HUMAN	1		_AAAYDIS(ph)EDEED_	Phospho (STY)	sp|P49585|PCY1A_HUMAN	1		_AAAAPGAS(ph)PSPGGDAAWSEAGPGPRPLAR_	Phospho (STY)	sp|P52701|MSH6_HUMAN	0.925		_AAAAGLGHPASPGGS(ph)EDGPPGSEEEDAAR_	Phospho (STY)	sp|Q99856|ARI3A_HUMAN	0.973		_AAAAGLGHPAS(ph)PGGSEDGPPGS(ph)EEEDAAR_	2 Phospho (STY)	sp|Q99856|ARI3A_HUMAN	0.999		_AAAT(ph)PESQEPQAK_	Phospho (STY)	sp|P49006|MRP_HUMAN	1		_AAESETPGKS(ph)PEK_	Phospho (STY)	sp|O76021|RL1D1_HUMAN	1		_AAAAGLGHPASPGGS(ph)EDGPPGS(ph)EEEDAAR_	2 Phospho (STY)	sp|Q99856|ARI3A_HUMAN	0.825		_AAEAGGAEEQYGFLTT(ph)PTK_	Phospho (STY)	sp|P46821|MAP1B_HUMAN	0.969		_AADS(ph)DDGAVSAPAASDGGVSK_	Phospho (STY)	sp|Q96GM8|TOE1_HUMAN	1
_AAATPES(ph)QEPQAK_	Phospho (STY)	sp|P49006|MRP_HUMAN	0.929		_AADIS(ph)LDNLVEGK_	Phospho (STY)	sp|Q12888|TP53B_HUMAN	1		_AAAAPGASPS(ph)PGGDAAWSEAGPGPRPLAR_	Phospho (STY)	sp|P52701|MSH6_HUMAN	0.982		_AAAAPGASPS(ph)PGGDAAWSEAGPGPRPLAR_	2 Phospho (STY)	sp|P52701|MSH6_HUMAN	0.834		_AAAT(ph)PESQEPQAK_	Phospho (STY)	sp|P49006|MRP_HUMAN	1		_AADPPAENSS(ph)APEAEQGGAE_	Phospho (STY)	sp|P67809|YBOX1_HUMAN	0.933		_AAHVPENS(ph)DTEQDVLTVKPVR_	Phospho (STY)	sp|Q9H2Y7|ZN106_HUMAN	0.932		_AAAYDIS(ph)EDEED_	Phospho (STY)	sp|P49585|PCY1A_HUMAN	0.996		_AAESETPGKS(ph)PEK_	Phospho (STY)	sp|O76021|RL1D1_HUMAN	0.962		_AAESETPGKS(ph)PEK_	Phospho (STY)	sp|O76021|RL1D1_HUMAN	0.994
_AAAYDIS(ph)EDEED_	Phospho (STY)	sp|P49585|PCY1A_HUMAN	1		_AADPPAENSS(ph)APEAEQGGAE_	Phospho (STY)	sp|P67809|YBOX1_HUMAN	0.924		_AAAT(ph)PESQEPQAK_	Phospho (STY)	sp|P49006|MRP_HUMAN	1		_AAAT(ph)PESQEPQAK_	Phospho (STY)	sp|P49006|MRP_HUMAN	1		_AAAYDIS(ph)EDEED_	Phospho (STY)	sp|P49585|PCY1A_HUMAN	1		_AADS(ph)DDGAVSAPAASDGGVSK_	Phospho (STY)	sp|Q96GM8|TOE1_HUMAN	1		_AAKLS(ph)EGS(ph)QPAEEEEDQETPSR_	2 Phospho (STY)	sp|Q9UKV3|ACINU_HUMAN	1		_AADPPAENSS(ph)APEAEQGGAE_	Phospho (STY)	sp|P67809|YBOX1_HUMAN	0.977		_AAFDDAIAELDTLS(ph)EESYK_	Phospho (STY)	sp|P62258|1433E_HUMAN	0.999		_AAKLS(ph)EGS(ph)QPAEEEEDQETPSR_	2 Phospho (STY)	sp|Q9UKV3|ACINU_HUMAN	1
_AADIS(ph)LDNLVEGK_	Phospho (STY)	sp|Q12888|TP53B_HUMAN	1		_AADS(ph)DDGAVSAPAASDGGVSK_	2 Phospho (STY)	sp|Q96GM8|TOE1_HUMAN	1		_AAAYDIS(ph)EDEED_	Phospho (STY)	sp|P49585|PCY1A_HUMAN	0.999		_AAAYDIS(ph)EDEED_	Phospho (STY)	sp|P49585|PCY1A_HUMAN	1		_AADIS(ph)LDNLVEGK_	Phospho (STY)	sp|Q12888|TP53B_HUMAN	1		_AAEAGGAEEQYGFLTT(ph)PTK_	Phospho (STY)	sp|P46821|MAP1B_HUMAN	0.98		_AALAPAKES(ph)PRK_	Phospho (STY)	sp|Q13428|TCOF_HUMAN	1		_AADS(ph)DDGAVSAPAASDGGVSK_	Phospho (STY)	sp|Q96GM8|TOE1_HUMAN	1		_AAKPGPAEAPSPTASPSGDAS(ph)PPATAPYDPR_	Phospho (STY)	sp|Q9UPT8|ZC3H4_HUMAN	0.978		_AAKNS(ph)EEEEEEK_	Phospho (STY)	sp|Q14978|NOLC1_HUMAN	1
_AADPPAENSS(ph)APEAEQGGAE_	2 Phospho (STY)	sp|P67809|YBOX1_HUMAN	0.865		_AAES(ph)ETPGKSPEK_	Phospho (STY)	sp|O76021|RL1D1_HUMAN	0.855		_AADIS(ph)LDNLVEGK_	Phospho (STY)	sp|Q12888|TP53B_HUMAN	1		_AADFPS(ph)DWS(ph)DGEMMLK_	Phospho (STY)	sp|Q6Q759|SPG17_HUMAN	1		_AADPPAENSS(ph)APEAEQGGAE_	Phospho (STY)	sp|P67809|YBOX1_HUMAN	0.983		_AAESETPGKS(ph)PEK_	Phospho (STY)	sp|O76021|RL1D1_HUMAN	1		_AAS(ph)PHQVTPQADEK_	Phospho (STY)	sp|Q96L73|NSD1_HUMAN	1		_AAESET(ph)PGKS(ph)PEK_	2 Phospho (STY)	sp|O76021|RL1D1_HUMAN	0.971		_AALLAQYADVT(ph)DEEDEADEK_	Phospho (STY)	sp|Q96MW1|CCD43_HUMAN	1		_AAS(ph)PS(ph)PQS(ph)VRR_	3 Phospho (STY)	sp|Q8IYB3|SRRM1_HUMAN	1
_AADRLPNLSS(ph)PSAEGPPGPPSGPAPR_	Phospho (STY)	sp|O60784|TOM1_HUMAN	0.876		_AAESETPGKS(ph)PEK_	Phospho (STY)	sp|O76021|RL1D1_HUMAN	0.995		_AADPPAENSS(ph)APEAEQGGAE_	Phospho (STY)	sp|P67809|YBOX1_HUMAN	0.98		_AADPPAENSS(ph)APEAEQGGAE_	2 Phospho (STY)	sp|P67809|YBOX1_HUMAN	0.973		_AADS(ph)DDGAVSAPAASDGGVSK_	Phospho (STY)	sp|Q96GM8|TOE1_HUMAN	1		_AAFDDAIAELDTLS(ph)EESYK_	Phospho (STY)	sp|P62258|1433E_HUMAN	0.998		_AAS(ph)PPASASDLIEQQQK_	Phospho (STY)	sp|Q5VSL9|STRP1_HUMAN	0.999		_AAESETPGKS(ph)PEK_	Phospho (STY)	sp|O76021|RL1D1_HUMAN	1		_AALLAQYADVT(ph)DEEDEADEKDDSGATTM(ox)NIGSDK_	Oxidation (M),Phospho (STY)	sp|Q96MW1|CCD43_HUMAN	1		_AAS(ph)PS(ph)PQSVR_	2 Phospho (STY)	sp|Q8IYB3|SRRM1_HUMAN	1
_AADS(ph)DDGAVSAPAASDGGVSK_	Phospho (STY)	sp|Q96GM8|TOE1_HUMAN	1		_AAGGAPS(ph)PPPPVR_	Phospho (STY)	sp|Q4KMP7|TB10B_HUMAN	1		_AADRLPNLSS(ph)PSAEGPPGPPSGPAPR_	Phospho (STY)	sp|O60784|TOM1_HUMAN	0.919		_AADRLPNLSS(ph)PSAEGPPGPPSGPAPR_	Phospho (STY)	sp|O60784|TOM1_HUMAN	0.872		_AAEDDSASPPGAAS(ph)DAEPGDEERPGLQVDCVVCGDK_	Phospho (STY)	sp|P10588|NR2F6_HUMAN	0.93		_AAGS(ph)PSSSDQDEKLPGQDESTAGTSEQNDILK_	Phospho (STY)	sp|Q9Y520|PRC2C_HUMAN	0.918		_AAS(ph)PS(ph)PQSVR_	2 Phospho (STY)	sp|Q8IYB3|SRRM1_HUMAN	1		_AAGGNS(ph)REPS(ph)PLPELALR_	2 Phospho (STY)	sp|Q13207|TBX2_HUMAN	1		_AALLAQYADVT(ph)DEEDEADEKDDSGATTMNIGSDK_	Phospho (STY)	sp|Q96MW1|CCD43_HUMAN	1		_AAS(ph)PS(ph)PQSVRR_	2 Phospho (STY)	sp|Q8IYB3|SRRM1_HUMAN	0.831
_AADSQNSGEGNTGAAESS(ph)FSQEVSR_	Phospho (STY)	sp|P12270|TPR_HUMAN	0.816		_AAGS(ph)PSSSDQDEKLPGQDESTAGTSEQNDILK_	Oxidation (M),Phospho (STY)	sp|Q9Y520|PRC2C_HUMAN	0.943		_AADS(ph)DDGAVSAPAASDGGVSK_	Phospho (STY)	sp|Q96GM8|TOE1_HUMAN	1		_AADS(ph)DDGAVSAPAASDGGVSK_	Phospho (STY)	sp|Q96GM8|TOE1_HUMAN	1		_AAEEQGDDQDS(ph)EKSKPAGS(ph)DGERR_	2 Phospho (STY)	sp|Q1KMD3|HNRL2_HUMAN	0.904		_AAHVPENS(ph)DTEQDVLTVKPVRK_	Phospho (STY)	sp|Q9H2Y7|ZN106_HUMAN	0.986		_AAS(ph)PS(ph)PQSVRR_	2 Phospho (STY)	sp|Q8IYB3|SRRM1_HUMAN	0.992		_AAKLS(ph)EGS(ph)QPAEEEEDQETPSR_	2 Phospho (STY)	sp|Q9UKV3|ACINU_HUMAN	1		_AAMYDIISS(ph)PSK_	Phospho (STY)	sp|Q6KC79|NIPBL_HUMAN	0.923		_AAS(ph)PSPQSVR_	Phospho (STY)	sp|Q8IYB3|SRRM1_HUMAN	0.998
_AAEAGGAEEQYGFLTT(ph)PTK_	Phospho (STY)	sp|P46821|MAP1B_HUMAN	0.97		_AAHVPENS(ph)DTEQDVLTVKPVR_	Phospho (STY)	sp|Q9H2Y7|ZN106_HUMAN	0.992		_AAEAGGAEEQYGFLTT(ph)PTK_	Phospho (STY)	sp|P46821|MAP1B_HUMAN	0.991		_AAEAGGAEEQYGFLTT(ph)PTK_	Phospho (STY)	sp|P46821|MAP1B_HUMAN	0.902		_AAESET(ph)PGKS(ph)PEK_	2 Phospho (STY)	sp|O76021|RL1D1_HUMAN	0.947		_AAKLS(ph)EGS(ph)QPAEEEEDQETPSR_	2 Phospho (STY)	sp|Q9UKV3|ACINU_HUMAN	1		_AAS(ph)PSPQSVR_	Phospho (STY)	sp|Q8IYB3|SRRM1_HUMAN	1		_AAKPGPAEAPS(ph)PTASPSGDAS(ph)PPATAPYDPR_	2 Phospho (STY)	sp|Q9UPT8|ZC3H4_HUMAN	0.853		_AAS(ph)LNYLNQPSAAPLQVSR_	Phospho (STY)	sp|Q9NSK0|KLC4_HUMAN	1		_AAVLS(ph)DS(ph)EDEEK_	2 Phospho (STY)	sp|Q96ST2|IWS1_HUMAN	1
_AAEDDSASPPGAAS(ph)DAEPGDEERPGLQVDCVVCGDK_	Oxidation (M),Phospho (STY)	sp|P10588|NR2F6_HUMAN	0.999		_AAHVPENS(ph)DTEQDVLTVKPVRK_	Phospho (STY)	sp|Q9H2Y7|ZN106_HUMAN	0.997		_AAEDDSASPPGAAS(ph)DAEPGDEERPGLQVDCVVCGDK_	Phospho (STY)	sp|P10588|NR2F6_HUMAN	0.986		_AAESETPGKS(ph)PEK_	Oxidation (M),Phospho (STY)	sp|O76021|RL1D1_HUMAN	1		_AAESETPGKS(ph)PEK_	Phospho (STY)	sp|O76021|RL1D1_HUMAN	1		_AAKPGPAEAPSPTASPSGDAS(ph)PPATAPYDPR_	Phospho (STY)	sp|Q9UPT8|ZC3H4_HUMAN	0.995		_AAS(ph)YTEEDENHTAK_	Phospho (STY)	sp|Q14126|DSG2_HUMAN	1		_AAS(ph)PS(ph)PQS(ph)VR_	3 Phospho (STY)	sp|Q8IYB3|SRRM1_HUMAN	1		_AAS(ph)PS(ph)PQSVR_	2 Phospho (STY)	sp|Q8IYB3|SRRM1_HUMAN	0.999		_ADAPDAGAQS(ph)DSELPSYHQNDVSLDR_	Phospho (STY)	sp|Q92538|GBF1_HUMAN	0.965
_AAESETPGKS(ph)PEK_	Phospho (STY)	sp|O76021|RL1D1_HUMAN	0.997		_AAKLS(ph)EGS(ph)QPAEEEEDQETPSR_	Phospho (STY)	sp|Q9UKV3|ACINU_HUMAN	1		_AAESETPGKS(ph)PEK_	Phospho (STY)	sp|O76021|RL1D1_HUMAN	1		_AAGGAPS(ph)PPPPVR_	Phospho (STY)	sp|Q4KMP7|TB10B_HUMAN	1		_AAFDDAIAELDTLS(ph)EESYK_	Phospho (STY)	sp|P62258|1433E_HUMAN	0.908		_AALAPAKES(ph)PR_	Phospho (STY)	sp|Q13428|TCOF_HUMAN	1		_AAVLS(ph)DS(ph)EDEEK_	2 Phospho (STY)	sp|Q96ST2|IWS1_HUMAN	1		_AAS(ph)PS(ph)PQS(ph)VRR_	3 Phospho (STY)	sp|Q8IYB3|SRRM1_HUMAN	1		_AAS(ph)PSPQSVR_	Phospho (STY)	sp|Q8IYB3|SRRM1_HUMAN	1		_ADAPDAGAQSDS(ph)ELPSYHQNDVSLDR_	Phospho (STY)	sp|Q92538|GBF1_HUMAN	0.821
_AAFDDAIAELDTLS(ph)EESYK_	Phospho (STY)	sp|P62258|1433E_HUMAN	0.998		_AAKPGPAEAPSPTASPSGDAS(ph)PPATAPYDPR_	Phospho (STY)	sp|Q9UPT8|ZC3H4_HUMAN	0.986		_AAFTTPDHAPLS(ph)PQSSVASSGSEQTEEQGSSR_	Phospho (STY)	sp|Q5PRF9|SMAG2_HUMAN	0.997		_AAGS(ph)PSSSDQDEKLPGQDESTAGTSEQNDILK_	Phospho (STY)	sp|Q9Y520|PRC2C_HUMAN	0.971		_AAGGAPS(ph)PPPPVR_	Phospho (STY)	sp|Q4KMP7|TB10B_HUMAN	1		_AALAPAKES(ph)PRK_	Phospho (STY)	sp|Q13428|TCOF_HUMAN	1		_AAVVTS(ph)PPPTTAPHK_	Phospho (STY)	sp|P35611|ADDA_HUMAN	0.867		_AAS(ph)PS(ph)PQSVR_	2 Phospho (STY)	sp|Q8IYB3|SRRM1_HUMAN	1		_AAS(ph)YTEEDENHTAK_	Phospho (STY)	sp|Q14126|DSG2_HUMAN	0.984		_ADDFPVRDDPS(ph)DVT(ph)DEDEGPAEPPPPPK_	2 Phospho (STY)	sp|Q3YEC7|RABL6_HUMAN	1
_AAFSKDES(ph)KEPIVEVR_	Phospho (STY)	sp|P13591|NCAM1_HUMAN	0.92		_AALAPAKES(ph)PR_	2 Phospho (STY)	sp|Q13428|TCOF_HUMAN	1		_AAGGAPS(ph)PPPPVR_	Phospho (STY)	sp|Q4KMP7|TB10B_HUMAN	1		_AAHVPENS(ph)DTEQDVLTVKPVR_	Phospho (STY)	sp|Q9H2Y7|ZN106_HUMAN	0.997		_AAGGNS(ph)REPS(ph)PLPELALR_	2 Phospho (STY)	sp|Q13207|TBX2_HUMAN	1		_AALLAQYADVT(ph)DEEDEADEK_	Phospho (STY)	sp|Q96MW1|CCD43_HUMAN	1		_ADAPDAGAQS(ph)DSELPSYHQNDVSLDR_	Phospho (STY)	sp|Q92538|GBF1_HUMAN	0.937		_AAS(ph)PS(ph)PQSVRR_	2 Phospho (STY)	sp|Q8IYB3|SRRM1_HUMAN	1		_AAVVTS(ph)PPPTTAPHK_	Phospho (STY)	sp|P35611|ADDA_HUMAN	0.948		_ADEPS(ph)S(ph)EESDLEIDK_	2 Phospho (STY)	sp|P50502|F10A1_HUMAN	0.941
_AAFTTPDHAPLS(ph)PQSSVASSGSEQTEEQGSSR_	Phospho (STY)	sp|Q5PRF9|SMAG2_HUMAN	0.949		_AALAPAKES(ph)PRK_	2 Phospho (STY)	sp|Q13428|TCOF_HUMAN	1		_AAGS(ph)PSSSDQDEKLPGQDESTAGTSEQNDILK_	Phospho (STY)	sp|Q9Y520|PRC2C_HUMAN	0.941		_AAKLS(ph)EGS(ph)QPAEEEEDQETPSR_	Phospho (STY)	sp|Q9UKV3|ACINU_HUMAN	1		_AAGS(ph)PSSSDQDEKLPGQDESTAGTSEQNDILK_	Phospho (STY)	sp|Q9Y520|PRC2C_HUMAN	0.968		_AALLAQYADVT(ph)DEEDEADEKDDSGATTM(ox)NIGSDK_	Oxidation (M),Phospho (STY)	sp|Q96MW1|CCD43_HUMAN	1		_ADEAS(ph)ELACPTPK_	Phospho (STY)	sp|P49327|FAS_HUMAN	0.812		_AAS(ph)PSPQSVR_	Phospho (STY)	sp|Q8IYB3|SRRM1_HUMAN	0.999		_ADAPDAGAQS(ph)DSELPSYHQNDVSLDR_	Phospho (STY)	sp|Q92538|GBF1_HUMAN	0.952		_ADEPSS(ph)EES(ph)DLEIDK_	2 Phospho (STY)	sp|P50502|F10A1_HUMAN	0.999
_AAGGAPS(ph)PPPPVR_	Phospho (STY)	sp|Q4KMP7|TB10B_HUMAN	1		_AALLAQYADVT(ph)DEEDEADEK_	Phospho (STY)	sp|Q96MW1|CCD43_HUMAN	1		_AAHVPENS(ph)DTEQDVLTVKPVR_	Phospho (STY)	sp|Q9H2Y7|ZN106_HUMAN	0.995		_AAKPGPAEAPSPTASPSGDAS(ph)PPATAPYDPR_	Phospho (STY)	sp|Q9UPT8|ZC3H4_HUMAN	0.999		_AAHVPENS(ph)DTEQDVLTVKPVR_	Phospho (STY)	sp|Q9H2Y7|ZN106_HUMAN	0.934		_AALLAQYADVT(ph)DEEDEADEKDDSGATTMNIGSDK_	Phospho (STY)	sp|Q96MW1|CCD43_HUMAN	1		_ADEPSS(ph)EES(ph)DLEIDK_	2 Phospho (STY)	sp|P50502|F10A1_HUMAN	0.987		_AASSS(ph)S(ph)PGSPVASSPSR_	2 Phospho (STY)	sp|Q92538|GBF1_HUMAN	0.825		_ADREVQAEQPSSSS(ph)PR_	Phospho (STY)	sp|Q9Y388|RBMX2_HUMAN	0.996		_AEAPS(ph)S(ph)PDVAPAGK_	2 Phospho (STY)	sp|Q9P1Y6|PHRF1_HUMAN	1
_AAGS(ph)PSSSDQDEKLPGQDESTAGTSEQNDILK_	Phospho (STY)	sp|Q9Y520|PRC2C_HUMAN	0.866		_AALLAQYADVT(ph)DEEDEADEKDDSGATTM(ox)NIGSDK_	Phospho (STY)	sp|Q96MW1|CCD43_HUMAN	1		_AAHVPENS(ph)DTEQDVLTVKPVRK_	Phospho (STY)	sp|Q9H2Y7|ZN106_HUMAN	0.999		_AALAPAKES(ph)PR_	Phospho (STY)	sp|Q13428|TCOF_HUMAN	1		_AAHVPENS(ph)DTEQDVLTVKPVRK_	Phospho (STY)	sp|Q9H2Y7|ZN106_HUMAN	0.991		_AAMYDIISS(ph)PSK_	Phospho (STY)	sp|Q6KC79|NIPBL_HUMAN	0.995		_ADREVQAEQPSSSS(ph)PR_	Phospho (STY)	sp|Q9Y388|RBMX2_HUMAN	0.986		_AAVLS(ph)DS(ph)EDEEK_	2 Phospho (STY)	sp|Q96ST2|IWS1_HUMAN	1		_AEDGATPS(ph)PSNETPK_	Phospho (STY)	sp|P29966|MARCS_HUMAN	0.963		_AEDGAT(ph)PS(ph)PSNETPK_	2 Phospho (STY)	sp|P29966|MARCS_HUMAN	0.839
_AAHVPENS(ph)DTEQDVLTVKPVR_	Phospho (STY)	sp|Q9H2Y7|ZN106_HUMAN	0.991		_AALLAQYADVT(ph)DEEDEADEKDDSGATTMNIGSDK_	Phospho (STY)	sp|Q96MW1|CCD43_HUMAN	0.998		_AAKLS(ph)EGS(ph)QPAEEEEDQETPSR_	2 Phospho (STY)	sp|Q9UKV3|ACINU_HUMAN	1		_AALAPAKES(ph)PRK_	2 Phospho (STY)	sp|Q13428|TCOF_HUMAN	1		_AAKLS(ph)EGS(ph)QPAEEEEDQETPSR_	2 Phospho (STY)	sp|Q9UKV3|ACINU_HUMAN	1		_AAS(ph)LTEDRDR_	Phospho (STY)	sp|Q04637|IF4G1_HUMAN	1		_ADS(ph)DSEDKGEESKPK_	Phospho (STY)	sp|P83916|CBX1_HUMAN	1		_ADAIFS(ph)QERDPR_	Phospho (STY)	sp|Q9HBZ2|ARNT2_HUMAN	1		_AEDGATPS(ph)PSNETPKK_	Phospho (STY)	sp|P29966|MARCS_HUMAN	0.819		_AEDGATPS(ph)PSNET(ph)PK_	2 Phospho (STY)	sp|P29966|MARCS_HUMAN	0.98
_AAIELPSLEVLS(ph)DQEEDREQCGVK_	Phospho (STY)	sp|Q9BQI3|E2AK1_HUMAN	0.937		_AAM(ox)YDIISS(ph)PSK_	2 Phospho (STY)	sp|Q6KC79|NIPBL_HUMAN	0.992		_AAKNS(ph)EEEEEEK_	Phospho (STY)	sp|Q14978|NOLC1_HUMAN	1		_AALLAQYADVT(ph)DEEDEADEK_	Phospho (STY)	sp|Q96MW1|CCD43_HUMAN	1		_AAKPGPAEAPSPTASPSGDAS(ph)PPATAPYDPR_	Phospho (STY)	sp|Q9UPT8|ZC3H4_HUMAN	0.928		_AAS(ph)PFR_	Phospho (STY)	sp|O95817|BAG3_HUMAN	1		_AEDGATPS(ph)PSNETPK_	Phospho (STY)	sp|P29966|MARCS_HUMAN	0.811		_ADAPDAGAQS(ph)DSELPSYHQNDVSLDR_	Phospho (STY)	sp|Q92538|GBF1_HUMAN	0.937		_AEDGATPSPSNET(ph)PK_	Phospho (STY)	sp|P29966|MARCS_HUMAN	1		_AEDGATPSPS(ph)NET(ph)PK_	2 Phospho (STY)	sp|P29966|MARCS_HUMAN	0.903
_AAKLS(ph)EGS(ph)QPAEEEEDQETPSR_	2 Phospho (STY)	sp|Q9UKV3|ACINU_HUMAN	1		_AAMYDIISS(ph)PSK_	2 Phospho (STY)	sp|Q6KC79|NIPBL_HUMAN	0.997		_AAKPGPAEAPSPTASPSGDAS(ph)PPATAPYDPR_	Phospho (STY)	sp|Q9UPT8|ZC3H4_HUMAN	0.999		_AALLAQYADVT(ph)DEEDEADEKDDSGATTM(ox)NIGSDK_	Phospho (STY)	sp|Q96MW1|CCD43_HUMAN	1		_AALAPAKES(ph)PR_	Phospho (STY)	sp|Q13428|TCOF_HUMAN	1		_AAS(ph)PHQVTPQADEK_	Phospho (STY)	sp|Q96L73|NSD1_HUMAN	1		_AEDGATPS(ph)PSNETPKK_	Phospho (STY)	sp|P29966|MARCS_HUMAN	0.927		_ADDFPVRDDPS(ph)DVT(ph)DEDEGPAEPPPPPK_	2 Phospho (STY)	sp|Q3YEC7|RABL6_HUMAN	1		_AEDGATPSPSNET(ph)PKK_	Phospho (STY)	sp|P29966|MARCS_HUMAN	1		_AEDGATPSPSNET(ph)PK_	Phospho (STY)	sp|P29966|MARCS_HUMAN	0.997
_AAKNS(ph)EEEEEEK_	Phospho (STY)	sp|Q14978|NOLC1_HUMAN	1		_AAPEAS(ph)SPPAS(ph)PLQHLLPGK_	Oxidation (M),Phospho (STY)	sp|Q96TA1|NIBL1_HUMAN	0.924		_AALAPAKES(ph)PR_	Phospho (STY)	sp|Q13428|TCOF_HUMAN	1		_AALLAQYADVT(ph)DEEDEADEKDDSGATTMNIGSDK_	Phospho (STY)	sp|Q96MW1|CCD43_HUMAN	1		_AALAPAKES(ph)PRK_	Phospho (STY)	sp|Q13428|TCOF_HUMAN	1		_AAS(ph)PPASASDLIEQQQK_	Phospho (STY)	sp|Q5VSL9|STRP1_HUMAN	1		_AEDGATPSPSNET(ph)PK_	Phospho (STY)	sp|P29966|MARCS_HUMAN	1		_ADEICIAGS(ph)PLT(ph)PR_	2 Phospho (STY)	sp|Q08999|RBL2_HUMAN	1		_AEEDEILNRS(ph)PR_	Phospho (STY)	sp|P27824|CALX_HUMAN	1		_AEEDEILNRS(ph)PR_	Phospho (STY)	sp|P27824|CALX_HUMAN	1
_AAKPGPAEAPSPTASPSGDAS(ph)PPATAPYDPR_	Phospho (STY)	sp|Q9UPT8|ZC3H4_HUMAN	0.994		_AAS(ph)AATAAPTATPAAQESGTIPK_	Phospho (STY)	sp|O00116|ADAS_HUMAN	0.974		_AALAPAKES(ph)PRK_	Phospho (STY)	sp|Q13428|TCOF_HUMAN	1		_AAM(ox)YDIISS(ph)PSK_	2 Phospho (STY)	sp|Q6KC79|NIPBL_HUMAN	0.934		_AALLAQYADVT(ph)DEEDEADEK_	Phospho (STY)	sp|Q96MW1|CCD43_HUMAN	1		_AAS(ph)PS(ph)PQSVR_	2 Phospho (STY)	sp|Q8IYB3|SRRM1_HUMAN	1		_AEDGATPSPSNET(ph)PKK_	Phospho (STY)	sp|P29966|MARCS_HUMAN	1		_ADEPSS(ph)EES(ph)DLEIDK_	2 Phospho (STY)	sp|P50502|F10A1_HUMAN	0.994		_AEGEPQEES(ph)PLK_	Phospho (STY)	sp|Q9NYF8|BCLF1_HUMAN	1		_AES(ph)PESSAIESTQST(ph)PQK_	2 Phospho (STY)	sp|Q9NTI5|PDS5B_HUMAN	0.998
_AALAPAKES(ph)PR_	Phospho (STY)	sp|Q13428|TCOF_HUMAN	1		_AAS(ph)DTERDGLAPEK_	Phospho (STY)	sp|Q7L4I2|RSRC2_HUMAN	0.997		_AALLAQYADVT(ph)DEEDEADEK_	Phospho (STY)	sp|Q96MW1|CCD43_HUMAN	1		_AAMYDIISS(ph)PSK_	2 Phospho (STY)	sp|Q6KC79|NIPBL_HUMAN	0.997		_AALLAQYADVT(ph)DEEDEADEKDDSGATTM(ox)NIGSDK_	Oxidation (M),Phospho (STY)	sp|Q96MW1|CCD43_HUMAN	1		_AAS(ph)PSPQSVR_	Phospho (STY)	sp|Q8IYB3|SRRM1_HUMAN	1		_AEEAKDEPPS(ph)EGEAEEEEK_	Phospho (STY)	sp|P07196|NFL_HUMAN	1		_ADTS(ph)QEICS(ph)PR_	2 Phospho (STY)	sp|P52948|NUP98_HUMAN	0.99		_AEGEWEDQEALDYFS(ph)DK_	Phospho (STY)	sp|Q9NYF8|BCLF1_HUMAN	1		_AFVEDS(ph)EDEDGAGEGGSSLLQK_	Phospho (STY)	sp|Q8N9T8|KRI1_HUMAN	1
_AALAPAKES(ph)PRK_	Oxidation (M),Phospho (STY)	sp|Q13428|TCOF_HUMAN	1		_AAS(ph)LNYLNQPSAAPLQVSR_	Phospho (STY)	sp|Q9NSK0|KLC4_HUMAN	1		_AALLAQYADVT(ph)DEEDEADEKDDSGATTM(ox)NIGSDK_	Oxidation (M),Phospho (STY)	sp|Q96MW1|CCD43_HUMAN	0.985		_AAS(ph)LNYLNQPSAAPLQVSR_	Phospho (STY)	sp|Q9NSK0|KLC4_HUMAN	1		_AALLAQYADVT(ph)DEEDEADEKDDSGATTMNIGSDK_	Phospho (STY)	sp|Q96MW1|CCD43_HUMAN	0.997		_AAS(ph)YTEEDENHTAK_	Phospho (STY)	sp|Q14126|DSG2_HUMAN	1		_AEEAQKTES(ph)VDNEGE_	Phospho (STY)	sp|Q15651|HMGN3_HUMAN	0.914		_AEAPS(ph)S(ph)PDVAPAGK_	2 Phospho (STY)	sp|Q9P1Y6|PHRF1_HUMAN	1		_AEQDVENDLLDY(ph)DEEEEPQAPQESTPAPPKK_	Phospho (STY)	sp|O00148|DX39A_HUMAN	1		_AGDLLEDS(ph)PK_	Phospho (STY)	sp|P51858|HDGF_HUMAN	1
_AALLAQYADVT(ph)DEEDEADEK_	Phospho (STY)	sp|Q96MW1|CCD43_HUMAN	1		_AAS(ph)LTEDRDR_	2 Phospho (STY)	sp|Q04637|IF4G1_HUMAN	1		_AAM(ox)YDIISS(ph)PSK_	Oxidation (M),Phospho (STY)	sp|Q6KC79|NIPBL_HUMAN	0.996		_AAS(ph)PESASSTPESLQAR_	Phospho (STY)	sp|Q96BT3|CENPT_HUMAN	1		_AALQTAPESADDSPS(ph)QLSK_	Phospho (STY)	sp|O43524|FOXO3_HUMAN	0.911		_AASGEDSTEEALAAAAAPWEGGPVPGVDRS(ph)PFAK_	Phospho (STY)	sp|Q641Q2|FA21A_HUMAN	1		_AEEDEILNRS(ph)PR_	Phospho (STY)	sp|P27824|CALX_HUMAN	1		_AEAPS(ph)S(ph)PDVAPAGKEDS(ph)PSASGR_	3 Phospho (STY)	sp|Q9P1Y6|PHRF1_HUMAN	0.974		_AES(ph)PAEKVPEESVLPLVQK_	Phospho (STY)	sp|Q9UKV3|ACINU_HUMAN	1		_AGDLLEDS(ph)PKRPK_	Phospho (STY)	sp|P51858|HDGF_HUMAN	1
_AALLAQYADVT(ph)DEEDEADEKDDSGATTM(ox)NIGSDK_	Phospho (STY)	sp|Q96MW1|CCD43_HUMAN	1		_AAS(ph)PESASSTPESLQAR_	Phospho (STY)	sp|Q96BT3|CENPT_HUMAN	0.999		_AAMYDIISS(ph)PSK_	Phospho (STY)	sp|Q6KC79|NIPBL_HUMAN	0.917		_AAS(ph)PFR_	Phospho (STY)	sp|O95817|BAG3_HUMAN	1		_AAM(ox)YDIISS(ph)PSK_	Oxidation (M),Phospho (STY)	sp|Q6KC79|NIPBL_HUMAN	0.999		_AAVGQES(ph)PGGLEAGNAK_	Phospho (STY)	sp|Q29RF7|PDS5A_HUMAN	1		_AEEKS(ph)PISINVK_	Phospho (STY)	sp|Q9UK58|CCNL1_HUMAN	0.999		_AEAPSS(ph)PDVAPAGKEDS(ph)PSASGR_	2 Phospho (STY)	sp|Q9P1Y6|PHRF1_HUMAN	0.984		_AES(ph)PSPAPPPGLR_	Phospho (STY)	sp|Q9BUA3|CK084_HUMAN	1		_AGGPTT(ph)PLS(ph)PTR_	2 Phospho (STY)	sp|P20700|LMNB1_HUMAN	0.989
_AALLAQYADVT(ph)DEEDEADEKDDSGATTMNIGSDK_	Phospho (STY)	sp|Q96MW1|CCD43_HUMAN	1		_AAS(ph)PHQVTPQADEK_	Phospho (STY)	sp|Q96L73|NSD1_HUMAN	1		_AAPEEHDS(ph)PT(ph)EASQPIVEEEETK_	2 Phospho (STY)	sp|Q9H0S4|DDX47_HUMAN	0.989		_AAS(ph)PHQVTPQADEK_	Phospho (STY)	sp|Q96L73|NSD1_HUMAN	1		_AAMYDIISS(ph)PSK_	Phospho (STY)	sp|Q6KC79|NIPBL_HUMAN	0.944		_AAVLS(ph)DS(ph)EDEEK_	2 Phospho (STY)	sp|Q96ST2|IWS1_HUMAN	1		_AEGEPQEES(ph)PLK_	Phospho (STY)	sp|Q9NYF8|BCLF1_HUMAN	1		_AEDGAT(ph)PS(ph)PSNETPK_	2 Phospho (STY)	sp|P29966|MARCS_HUMAN	0.981		_AESSSGGGTVPSSAGILEQGPSPGDGS(ph)PPKPK_	Phospho (STY)	sp|Q68EM7|RHG17_HUMAN	0.999		_AGLES(ph)GAEPGDGDS(ph)DTTK_	2 Phospho (STY)	sp|O60832|DKC1_HUMAN	1
_AALQTAPESADDSPS(ph)QLSK_	Phospho (STY)	sp|O43524|FOXO3_HUMAN	0.81		_AAS(ph)PPASASDLIEQQQK_	Phospho (STY)	sp|Q5VSL9|STRP1_HUMAN	1		_AAS(ph)DTERDGLAPEK_	Phospho (STY)	sp|Q7L4I2|RSRC2_HUMAN	1		_AAS(ph)PPASASDLIEQQQK_	Phospho (STY)	sp|Q5VSL9|STRP1_HUMAN	1		_AAS(ph)AATAAPTATPAAQESGTIPK_	Phospho (STY)	sp|O00116|ADAS_HUMAN	0.995		_ADAPDAGAQS(ph)DSELPSYHQNDVSLDR_	Phospho (STY)	sp|Q92538|GBF1_HUMAN	0.977		_AES(ph)PAEKVPEESVLPLVQK_	Phospho (STY)	sp|Q9UKV3|ACINU_HUMAN	1		_AEDGAT(ph)PSPS(ph)NETPKK_	2 Phospho (STY)	sp|P29966|MARCS_HUMAN	0.942		_AET(ph)PTESVSEPEVATK_	Phospho (STY)	sp|P18858|DNLI1_HUMAN	1		_AGLES(ph)GAEPGDGDS(ph)DTTKK_	2 Phospho (STY)	sp|O60832|DKC1_HUMAN	1
_AAM(ox)YDIISS(ph)PSK_	Phospho (STY)	sp|Q6KC79|NIPBL_HUMAN	0.998		_AAS(ph)PS(ph)PQSVR_	Phospho (STY)	sp|Q8IYB3|SRRM1_HUMAN	1		_AAS(ph)LNYLNQPSAAPLQVSR_	Phospho (STY)	sp|Q9NSK0|KLC4_HUMAN	1		_AAS(ph)PS(ph)PQSVR_	Phospho (STY)	sp|Q8IYB3|SRRM1_HUMAN	1		_AAS(ph)DTERDGLAPEK_	Phospho (STY)	sp|Q7L4I2|RSRC2_HUMAN	0.989		_ADEASELACPT(ph)PK_	Phospho (STY)	sp|P49327|FAS_HUMAN	1		_AES(ph)PDLR_	Phospho (STY)	sp|Q6UN15|FIP1_HUMAN	1		_AEDGATPS(ph)PSNET(ph)PK_	2 Phospho (STY)	sp|P29966|MARCS_HUMAN	0.942		_AEVPGATGGDS(ph)PHLQPAEPPGEPR_	Phospho (STY)	sp|Q9P2K5|MYEF2_HUMAN	0.984		_AGLESGAEPGDGDS(ph)DTTK_	Phospho (STY)	sp|O60832|DKC1_HUMAN	0.981
_AAS(ph)AATAAPTATPAAQESGTIPK_	Phospho (STY)	sp|O00116|ADAS_HUMAN	0.848		_AAS(ph)PS(ph)PQSVRR_	Phospho (STY)	sp|Q8IYB3|SRRM1_HUMAN	1		_AAS(ph)PESASSTPESLQAR_	Phospho (STY)	sp|Q96BT3|CENPT_HUMAN	1		_AAS(ph)PS(ph)PQSVRR_	Phospho (STY)	sp|Q8IYB3|SRRM1_HUMAN	0.999		_AAS(ph)LTEDRDR_	Phospho (STY)	sp|Q04637|IF4G1_HUMAN	1		_ADREVQAEQPSSSS(ph)PR_	Phospho (STY)	sp|Q9Y388|RBMX2_HUMAN	1		_AES(ph)PESSAIESTQST(ph)PQK_	2 Phospho (STY)	sp|Q9NTI5|PDS5B_HUMAN	0.99		_AEDGATPSPSNET(ph)PK_	Phospho (STY)	sp|P29966|MARCS_HUMAN	1		_AFAAVPTSHPPEDAPAQPPTPGPAAS(ph)PEQLSFR_	Phospho (STY)	sp|Q14160|SCRIB_HUMAN	0.868		_AGLESGAEPGDGDS(ph)DTTKK_	Phospho (STY)	sp|O60832|DKC1_HUMAN	0.939
_AAS(ph)DTERDGLAPEK_	Phospho (STY)	sp|Q7L4I2|RSRC2_HUMAN	0.998		_AAS(ph)PSPQSVR_	Phospho (STY)	sp|Q8IYB3|SRRM1_HUMAN	1		_AAS(ph)PHQVTPQADEK_	Phospho (STY)	sp|Q96L73|NSD1_HUMAN	1		_AAS(ph)PSPQSVR_	Phospho (STY)	sp|Q8IYB3|SRRM1_HUMAN	1		_AAS(ph)PESASSTPESLQAR_	Phospho (STY)	sp|Q96BT3|CENPT_HUMAN	1		_ADS(ph)DSEDKGEESKPK_	Phospho (STY)	sp|P83916|CBX1_HUMAN	1		_AES(ph)PESSAIESTQSTPQK_	Phospho (STY)	sp|Q9NTI5|PDS5B_HUMAN	0.976		_AEEAQKTES(ph)VDNEGE_	Phospho (STY)	sp|Q15651|HMGN3_HUMAN	0.862		_AFGSGIDIKPGT(ph)PPIAGR_	Phospho (STY)	sp|Q9Y520|PRC2C_HUMAN	0.999		_AGLGS(ph)PERPPKT(ph)S(ph)PGSPR_	3 Phospho (STY)	sp|Q9H6F5|CCD86_HUMAN	0.944
_AAS(ph)LNYLNQPSAAPLQVSR_	Phospho (STY)	sp|Q9NSK0|KLC4_HUMAN	1		_AAS(ph)YTEEDENHTAK_	Phospho (STY)	sp|Q14126|DSG2_HUMAN	1		_AAS(ph)PPASASDLIEQQQK_	Phospho (STY)	sp|Q5VSL9|STRP1_HUMAN	1		_AAS(ph)SDQLRDNS(ph)PPPAFKPEPPK_	Phospho (STY)	sp|Q9UDY2|ZO2_HUMAN	0.902		_AAS(ph)PHQVTPQADEK_	Phospho (STY)	sp|Q96L73|NSD1_HUMAN	1		_ADTSQEICS(ph)PR_	Phospho (STY)	sp|P52948|NUP98_HUMAN	1		_AES(ph)PSPAPPPGLR_	Phospho (STY)	sp|Q9BUA3|CK084_HUMAN	1		_AEEDEILNRS(ph)PR_	Phospho (STY)	sp|P27824|CALX_HUMAN	1		_AFVEDS(ph)EDEDGAGEGGSSLLQK_	Phospho (STY)	sp|Q8N9T8|KRI1_HUMAN	1		_AGLGS(ph)PERPPKT(ph)SPGS(ph)PR_	3 Phospho (STY)	sp|Q9H6F5|CCD86_HUMAN	0.963
_AAS(ph)PESASSTPESLQAR_	Phospho (STY)	sp|Q96BT3|CENPT_HUMAN	0.995		_AASSDQLRDNS(ph)PPPAFKPEPPK_	Phospho (STY)	sp|Q9UDY2|ZO2_HUMAN	0.958		_AAS(ph)PS(ph)PQSVR_	2 Phospho (STY)	sp|Q8IYB3|SRRM1_HUMAN	1		_AAS(ph)YTEEDENHTAK_	Phospho (STY)	sp|Q14126|DSG2_HUMAN	1		_AAS(ph)PPASASDLIEQQQK_	Phospho (STY)	sp|Q5VSL9|STRP1_HUMAN	1		_AEDGATPS(ph)PSNETPK_	Phospho (STY)	sp|P29966|MARCS_HUMAN	0.856		_AES(ph)PVKEEAVAEVVTITK_	Phospho (STY)	sp|P07197|NFM_HUMAN	1		_AEFNLTTY(ph)RS(ph)K_	2 Phospho (STY)	sp|A6NMZ7|CO6A6_HUMAN	0.969		_AGAEDDEEKGEGT(ph)PREEGK_	Phospho (STY)	sp|Q86VM9|ZCH18_HUMAN	1		_AGLGS(ph)PERPPKTS(ph)PGS(ph)PR_	3 Phospho (STY)	sp|Q9H6F5|CCD86_HUMAN	0.971
_AAS(ph)PHQVTPQADEK_	Phospho (STY)	sp|Q96L73|NSD1_HUMAN	1		_AATAARPPAPPPAPQPPSPT(ph)PS(ph)PPRPTLAR_	Phospho (STY)	sp|Q96B36|AKTS1_HUMAN	0.86		_AAS(ph)PS(ph)PQSVRR_	2 Phospho (STY)	sp|Q8IYB3|SRRM1_HUMAN	0.999		_AASSDQLRDNS(ph)PPPAFKPEPPK_	Phospho (STY)	sp|Q9UDY2|ZO2_HUMAN	0.991		_AAS(ph)PS(ph)PQSVR_	2 Phospho (STY)	sp|Q8IYB3|SRRM1_HUMAN	1		_AEDGATPS(ph)PSNETPKK_	Phospho (STY)	sp|P29966|MARCS_HUMAN	0.976		_AESSSGGGTVPSSAGILEQGPSPGDGS(ph)PPKPK_	Phospho (STY)	sp|Q68EM7|RHG17_HUMAN	0.996		_AEGEWEDQEALDYFS(ph)DK_	Phospho (STY)	sp|Q9NYF8|BCLF1_HUMAN	1		_AGDLLEDS(ph)PK_	Phospho (STY)	sp|P51858|HDGF_HUMAN	1		_AGSS(ph)T(ph)PGDAPPAVAEVQGR_	2 Phospho (STY)	sp|Q7Z6Z7|HUWE1_HUMAN	0.804
_AAS(ph)PPASASDLIEQQQK_	Phospho (STY)	sp|Q5VSL9|STRP1_HUMAN	1		_AAVGQES(ph)PGGLEAGNAK_	Phospho (STY)	sp|Q29RF7|PDS5A_HUMAN	1		_AAS(ph)PSPQSVR_	Phospho (STY)	sp|Q8IYB3|SRRM1_HUMAN	1		_AATAARPPAPPPAPQPPS(ph)PTPS(ph)PPRPTLAR_	Phospho (STY)	sp|Q96B36|AKTS1_HUMAN	0.95		_AAS(ph)PS(ph)PQSVRR_	2 Phospho (STY)	sp|Q8IYB3|SRRM1_HUMAN	0.972		_AEDGATPSPSNET(ph)PK_	Phospho (STY)	sp|P29966|MARCS_HUMAN	1		_AET(ph)PSANHSESDSLSQHNDFLSDK_	Phospho (STY)	sp|Q9ULM3|YETS2_HUMAN	0.956		_AES(ph)PDLR_	Phospho (STY)	sp|Q6UN15|FIP1_HUMAN	1		_AGDLLEDS(ph)PKRPK_	Phospho (STY)	sp|P51858|HDGF_HUMAN	1		_AKS(ph)PVPKS(ph)PVEEAK_	2 Phospho (STY)	sp|P07197|NFM_HUMAN	1
_AAS(ph)PS(ph)PQSVR_	Oxidation (M),Phospho (STY)	sp|Q8IYB3|SRRM1_HUMAN	0.999		_AAVLS(ph)DS(ph)EDEEK_	Oxidation (M),Phospho (STY)	sp|Q96ST2|IWS1_HUMAN	1		_AAS(ph)YTEEDENHTAK_	Phospho (STY)	sp|Q14126|DSG2_HUMAN	1		_AATAARPPAPPPAPQPPSPT(ph)PS(ph)PPRPTLAR_	Phospho (STY)	sp|Q96B36|AKTS1_HUMAN	0.851		_AAS(ph)PSPQSVR_	Phospho (STY)	sp|Q8IYB3|SRRM1_HUMAN	1		_AEDGATPSPSNET(ph)PKK_	Phospho (STY)	sp|P29966|MARCS_HUMAN	1		_AEVPGATGGDS(ph)PHLQPAEPPGEPR_	Phospho (STY)	sp|Q9P2K5|MYEF2_HUMAN	0.998		_AES(ph)PESSAIESTQS(ph)TPQK_	2 Phospho (STY)	sp|Q9NTI5|PDS5B_HUMAN	0.833		_AGEPNS(ph)PDAEEANSPDVTAGCDPAGVHPPR_	Phospho (STY)	sp|Q08J23|NSUN2_HUMAN	1		_AKS(ph)PVPKS(ph)PVEEK_	2 Phospho (STY)	sp|P07197|NFM_HUMAN	1
_AAS(ph)PSPQSVR_	Phospho (STY)	sp|Q8IYB3|SRRM1_HUMAN	1		_AAVSAFPTDS(ph)LER_	Phospho (STY)	sp|O14654|IRS4_HUMAN	0.965		_AASAPAKES(ph)PRK_	Phospho (STY)	sp|Q13428|TCOF_HUMAN	1		_AATAARPPAPPPAPQPPSPT(ph)PSPPRPT(ph)LAR_	Phospho (STY)	sp|Q96B36|AKTS1_HUMAN	0.899		_AAS(ph)SDQLRDNS(ph)PPPAFKPEPPK_	2 Phospho (STY)	sp|Q9UDY2|ZO2_HUMAN	0.923		_AEEAKDEPPS(ph)EGEAEEEEK_	Phospho (STY)	sp|P07196|NFL_HUMAN	1		_AFVEDS(ph)EDEDGAGEGGSSLLQK_	Phospho (STY)	sp|Q8N9T8|KRI1_HUMAN	1		_AES(ph)PESSAIESTQST(ph)PQK_	2 Phospho (STY)	sp|Q9NTI5|PDS5B_HUMAN	1		_AGGSAALS(ph)PSK_	Phospho (STY)	sp|Q92522|H1X_HUMAN	0.995		_ALM(ox)GS(ph)PQLVAAVVR_	Oxidation (M),Phospho (STY)	sp|P14923|PLAK_HUMAN	1
_AAS(ph)YTEEDENHTAK_	Phospho (STY)	sp|Q14126|DSG2_HUMAN	1		_AAVVTS(ph)PPPTTAPHK_	Phospho (STY)	sp|P35611|ADDA_HUMAN	0.93		_AASSDQLRDNS(ph)PPPAFKPEPPK_	Phospho (STY)	sp|Q9UDY2|ZO2_HUMAN	0.998		_AAVGQES(ph)PGGLEAGNAK_	Phospho (STY)	sp|Q29RF7|PDS5A_HUMAN	1		_AAS(ph)YTEEDENHTAK_	Phospho (STY)	sp|Q14126|DSG2_HUMAN	1		_AEEDEILNRS(ph)PR_	Phospho (STY)	sp|P27824|CALX_HUMAN	1		_AGAEDDEEKGEGT(ph)PREEGK_	Phospho (STY)	sp|Q86VM9|ZCH18_HUMAN	1		_AES(ph)PSPAPPPGLR_	Phospho (STY)	sp|Q9BUA3|CK084_HUMAN	0.999		_AGLESGAEPGDGDS(ph)DTTKK_	Phospho (STY)	sp|O60832|DKC1_HUMAN	0.98		_ALVVPEPEPDS(ph)DS(ph)NQER_	2 Phospho (STY)	sp|Q5VTR2|BRE1A_HUMAN	1
_AASAPAKES(ph)PRK_	Phospho (STY)	sp|Q13428|TCOF_HUMAN	1		_ADAPDAGAQS(ph)DSELPSYHQNDVSLDR_	Phospho (STY)	sp|Q92538|GBF1_HUMAN	0.953		_AASSSSPGS(ph)PVASSPSR_	Phospho (STY)	sp|Q92538|GBF1_HUMAN	0.997		_AAVLS(ph)DS(ph)EDEEK_	Phospho (STY)	sp|Q96ST2|IWS1_HUMAN	1		_AAVGQES(ph)PGGLEAGNAK_	Phospho (STY)	sp|Q29RF7|PDS5A_HUMAN	1		_AEEKS(ph)PISINVK_	Phospho (STY)	sp|Q9UK58|CCNL1_HUMAN	1		_AGDLLEDS(ph)PK_	Phospho (STY)	sp|P51858|HDGF_HUMAN	1		_AESSSGGGTVPSSAGILEQGPSPGDGS(ph)PPKPK_	Phospho (STY)	sp|Q68EM7|RHG17_HUMAN	0.915		_AGM(ox)SSNQSISS(ph)PVLDAVPRT(ph)PSR_	Oxidation (M),2 Phospho (STY)	sp|Q9UQ35|SRRM2_HUMAN	0.847		_ALVVPEPEPDSDS(ph)NQER_	Phospho (STY)	sp|Q5VTR2|BRE1A_HUMAN	0.972
_AASSDQLRDNS(ph)PPPAFKPEPPK_	Phospho (STY)	sp|Q9UDY2|ZO2_HUMAN	0.999		_ADDFPVRDDPS(ph)DVT(ph)DEDEGPAEPPPPPK_	Phospho (STY)	sp|Q3YEC7|RABL6_HUMAN	1		_AATAARPPAPPPAPQPPS(ph)PTPS(ph)PPRPTLAR_	2 Phospho (STY)	sp|Q96B36|AKTS1_HUMAN	0.883		_AAVSAFPTDS(ph)LER_	2 Phospho (STY)	sp|O14654|IRS4_HUMAN	0.886		_AAVLS(ph)DS(ph)EDEEK_	2 Phospho (STY)	sp|Q96ST2|IWS1_HUMAN	1		_AEENTDQAS(ph)PQEDYAGFER_	Phospho (STY)	sp|Q9NU22|MDN1_HUMAN	1		_AGDLLEDS(ph)PKRPK_	Phospho (STY)	sp|P51858|HDGF_HUMAN	1		_AEVPGATGGDS(ph)PHLQPAEPPGEPR_	Phospho (STY)	sp|Q9P2K5|MYEF2_HUMAN	0.999		_AGMSSNQSIS(ph)SPVLDAVPRT(ph)PSR_	2 Phospho (STY)	sp|Q9UQ35|SRRM2_HUMAN	0.862		_ANT(ph)PDS(ph)DITEK_	2 Phospho (STY)	sp|Q9H4L7|SMRCD_HUMAN	1
_AATAARPPAPPPAPQPPS(ph)PTPS(ph)PPRPTLAR_	Phospho (STY)	sp|Q96B36|AKTS1_HUMAN	0.966		_ADEPSS(ph)EES(ph)DLEIDK_	Phospho (STY)	sp|P50502|F10A1_HUMAN	0.987		_AATAARPPAPPPAPQPPSPT(ph)PS(ph)PPRPTLAR_	2 Phospho (STY)	sp|Q96B36|AKTS1_HUMAN	0.811		_AAVVTS(ph)PPPTTAPHK_	Phospho (STY)	sp|P35611|ADDA_HUMAN	0.992		_AAVLS(ph)DSEDEEK_	Phospho (STY)	sp|Q96ST2|IWS1_HUMAN	0.997		_AEGDSAGTAGT(ph)PGGTPAGDK_	Phospho (STY)	sp|Q92925|SMRD2_HUMAN	0.995		_AGEPNS(ph)PDAEEANSPDVTAGCDPAGVHPPR_	Phospho (STY)	sp|Q08J23|NSUN2_HUMAN	0.987		_AEYVPST(ph)PS(ph)PVPPSTPLLSAHSK_	2 Phospho (STY)	sp|Q4VCS5|AMOT_HUMAN	0.806		_AGMSSNQSISS(ph)PVLDAVPR_	Phospho (STY)	sp|Q9UQ35|SRRM2_HUMAN	0.824		_ANT(ph)PDS(ph)DITEKTEDSSVPETPDNERK_	2 Phospho (STY)	sp|Q9H4L7|SMRCD_HUMAN	0.93
_AATAARPPAPPPAPQPPSPT(ph)PS(ph)PPRPTLAR_	Phospho (STY)	sp|Q96B36|AKTS1_HUMAN	0.835		_ADLNQGIGEPQS(ph)PSRR_	Phospho (STY)	sp|Q96C19|EFHD2_HUMAN	0.966		_AAVGQES(ph)PGGLEAGNAK_	Phospho (STY)	sp|Q29RF7|PDS5A_HUMAN	1		_AAYGDLS(ph)S(ph)EEEEENEPESLGVVYK_	Phospho (STY)	sp|O15541|R113A_HUMAN	0.94		_AAVLSDS(ph)EDEEK_	Phospho (STY)	sp|Q96ST2|IWS1_HUMAN	0.985		_AEGEPQEES(ph)PLK_	Phospho (STY)	sp|Q9NYF8|BCLF1_HUMAN	1		_AGGAS(ph)PAASSTAQPPTQHR_	Phospho (STY)	sp|Q8IU81|I2BP1_HUMAN	1		_AFVEDS(ph)EDEDGAGEGGSSLLQK_	Phospho (STY)	sp|Q8N9T8|KRI1_HUMAN	1		_AGPTLTDENGDDLGLPPS(ph)PGDTSYYQDQVDDFHEAR_	Phospho (STY)	sp|Q9NQZ2|SAS10_HUMAN	0.974		_APIDTS(ph)DVEEK_	Phospho (STY)	sp|Q06265|EXOS9_HUMAN	0.894
_AAVGQES(ph)PGGLEAGNAK_	Phospho (STY)	sp|Q29RF7|PDS5A_HUMAN	1		_ADREVQAEQPSSSS(ph)PR_	Phospho (STY)	sp|Q9Y388|RBMX2_HUMAN	0.997		_AAVLS(ph)DS(ph)EDEEK_	2 Phospho (STY)	sp|Q96ST2|IWS1_HUMAN	1		_ADAPDAGAQS(ph)DSELPSYHQNDVSLDR_	Phospho (STY)	sp|Q92538|GBF1_HUMAN	0.959		_AAVSAFPTDS(ph)LER_	Phospho (STY)	sp|O14654|IRS4_HUMAN	0.965		_AEGEWEDQEALDYFS(ph)DK_	Phospho (STY)	sp|Q9NYF8|BCLF1_HUMAN	1		_AGGPTT(ph)PLS(ph)PTR_	2 Phospho (STY)	sp|P20700|LMNB1_HUMAN	0.84		_AGAPLGRS(ph)PAPDSAS(ph)PTR_	2 Phospho (STY)	sp|Q13207|TBX2_HUMAN	0.808		_AHPPVTSAPLS(ph)PPQPNDLYK_	Phospho (STY)	sp|Q4VCS5|AMOT_HUMAN	1		_APQTS(ph)SS(ph)PPPVRR_	2 Phospho (STY)	sp|Q8IYB3|SRRM1_HUMAN	0.862
_AAVLS(ph)DS(ph)EDEEK_	Phospho (STY)	sp|Q96ST2|IWS1_HUMAN	1		_ADS(ph)DGAKPEPVAM(ox)AR_	Phospho (STY)	sp|Q7Z4V5|HDGR2_HUMAN	1		_AAVLSDS(ph)EDEEK_	Phospho (STY)	sp|Q96ST2|IWS1_HUMAN	0.993		_ADDFPVRDDPS(ph)DVT(ph)DEDEGPAEPPPPPK_	Phospho (STY)	sp|Q3YEC7|RABL6_HUMAN	1		_AAVVTS(ph)PPPTTAPHK_	Phospho (STY)	sp|P35611|ADDA_HUMAN	0.964		_AENGERS(ph)DLEEDNER_	Phospho (STY)	sp|Q8WU90|ZC3HF_HUMAN	1		_AGGSAALS(ph)PSK_	Phospho (STY)	sp|Q92522|H1X_HUMAN	0.879		_AGDLLEDS(ph)PK_	Phospho (STY)	sp|P51858|HDGF_HUMAN	1		_AIGGIILTAS(ph)HNPGGPNGDFGIK_	Phospho (STY)	sp|P36871|PGM1_HUMAN	0.82		_APS(ph)DS(ph)SLGTPSDGRPELR_	2 Phospho (STY)	sp|Q15642|CIP4_HUMAN	0.893
_AAVLS(ph)DSEDEEK_	Phospho (STY)	sp|Q96ST2|IWS1_HUMAN	1		_ADS(ph)DGAKPEPVAMAR_	Phospho (STY)	sp|Q7Z4V5|HDGR2_HUMAN	1		_AAVSAFPTDS(ph)LER_	Phospho (STY)	sp|O14654|IRS4_HUMAN	0.995		_ADEASELACPT(ph)PKEDGLAQQQTQLNLR_	Phospho (STY)	sp|P49327|FAS_HUMAN	1		_AAYGDLS(ph)S(ph)EEEEENEPESLGVVYK_	2 Phospho (STY)	sp|O15541|R113A_HUMAN	0.957		_AEQDVENDLLDY(ph)DEEEEPQAPQESTPAPPKK_	Phospho (STY)	sp|O00148|DX39A_HUMAN	1		_AGLES(ph)GAEPGDGDS(ph)DTTK_	2 Phospho (STY)	sp|O60832|DKC1_HUMAN	0.997		_AGDLLEDS(ph)PKRPK_	Phospho (STY)	sp|P51858|HDGF_HUMAN	1		_AIGSTSKPQES(ph)PK_	Phospho (STY)	sp|P18887|XRCC1_HUMAN	1		_AQAVS(ph)EEEEEEEGK_	Phospho (STY)	sp|Q9GZR7|DDX24_HUMAN	1
_AAVLSDS(ph)EDEEK_	Phospho (STY)	sp|Q96ST2|IWS1_HUMAN	1		_ADS(ph)DSEDKGEESKPK_	Phospho (STY)	sp|P83916|CBX1_HUMAN	0.963		_AAVVTS(ph)PPPTTAPHK_	Phospho (STY)	sp|P35611|ADDA_HUMAN	0.964		_ADEPS(ph)SEES(ph)DLEIDK_	Phospho (STY)	sp|P50502|F10A1_HUMAN	0.837		_ADAPDAGAQS(ph)DSELPSYHQNDVSLDR_	Phospho (STY)	sp|Q92538|GBF1_HUMAN	0.904		_AES(ph)DGEEKEEVK_	Phospho (STY)	sp|O75691|UTP20_HUMAN	1		_AGLES(ph)GAEPGDGDS(ph)DTTKK_	2 Phospho (STY)	sp|O60832|DKC1_HUMAN	0.992		_AGEPNS(ph)PDAEEANSPDVTAGCDPAGVHPPR_	Phospho (STY)	sp|Q08J23|NSUN2_HUMAN	0.993		_AITSLLGGGS(ph)PK_	Phospho (STY)	sp|Q6KC79|NIPBL_HUMAN	0.975		_AQS(ph)TDS(ph)LGTSGSLQSK_	2 Phospho (STY)	sp|Q15276|RABE1_HUMAN	0.944
_AAVSAFPTDS(ph)LER_	Phospho (STY)	sp|O14654|IRS4_HUMAN	0.994		_ADS(ph)PPPSYPTQQAEQAPNTCECHVCK_	Phospho (STY)	sp|P78312|F193A_HUMAN	0.937		_ADAPDAGAQS(ph)DSELPSYHQNDVSLDR_	Phospho (STY)	sp|Q92538|GBF1_HUMAN	0.92		_ADEPSS(ph)EES(ph)DLEIDK_	Phospho (STY)	sp|P50502|F10A1_HUMAN	0.923		_ADDFPVRDDPS(ph)DVT(ph)DEDEGPAEPPPPPK_	2 Phospho (STY)	sp|Q3YEC7|RABL6_HUMAN	1		_AES(ph)GPDLR_	Phospho (STY)	sp|P15924|DESP_HUMAN	1		_AGLES(ph)GAEPGDGDSDTTK_	Phospho (STY)	sp|O60832|DKC1_HUMAN	1		_AGGPAT(ph)PLS(ph)PTR_	2 Phospho (STY)	sp|Q03252|LMNB2_HUMAN	0.991		_AKS(ph)PQPPVEEEDEHFDDTVVCLDTYNCDLHFK_	Phospho (STY)	sp|Q00839|HNRPU_HUMAN	1		_AQT(ph)PPGPSLSGSKS(ph)PCPQEK_	2 Phospho (STY)	sp|Q9UQ35|SRRM2_HUMAN	1
_AAVVTS(ph)PPPTTAPHK_	Phospho (STY)	sp|P35611|ADDA_HUMAN	0.985		_ADS(ph)RESLKPAAKPLPSK_	Phospho (STY)	sp|P46821|MAP1B_HUMAN	0.925		_ADDFPVRDDPS(ph)DVT(ph)DEDEGPAEPPPPPK_	2 Phospho (STY)	sp|Q3YEC7|RABL6_HUMAN	1		_ADREVQAEQPSSSS(ph)PR_	Phospho (STY)	sp|Q9Y388|RBMX2_HUMAN	0.999		_ADEPSS(ph)EES(ph)DLEIDK_	2 Phospho (STY)	sp|P50502|F10A1_HUMAN	0.994		_AES(ph)PAEKVPEESVLPLVQK_	Phospho (STY)	sp|Q9UKV3|ACINU_HUMAN	1		_AGLESGAEPGDGDS(ph)DTTK_	Phospho (STY)	sp|O60832|DKC1_HUMAN	0.998		_AGGPTT(ph)PLS(ph)PTR_	2 Phospho (STY)	sp|P20700|LMNB1_HUMAN	1		_AKS(ph)PVPKS(ph)PVEEAK_	2 Phospho (STY)	sp|P07197|NFM_HUMAN	1		_ARS(ph)QS(ph)VS(ph)PSK_	3 Phospho (STY)	sp|Q12872|SFSWA_HUMAN	0.99
_AAYGDLS(ph)S(ph)EEEEENEPESLGVVYK_	Phospho (STY)	sp|O15541|R113A_HUMAN	0.992		_ADSGPTQPPLSLS(ph)PAPETK_	Phospho (STY)	sp|O15027|SC16A_HUMAN	0.933		_ADEPSS(ph)EES(ph)DLEIDK_	2 Phospho (STY)	sp|P50502|F10A1_HUMAN	0.993		_ADS(ph)DGAKPEPVAMAR_	Phospho (STY)	sp|Q7Z4V5|HDGR2_HUMAN	1		_ADLNQGIGEPQS(ph)PSR_	Phospho (STY)	sp|Q96C19|EFHD2_HUMAN	0.98		_AES(ph)PDLR_	Phospho (STY)	sp|Q6UN15|FIP1_HUMAN	1		_AGLESGAEPGDGDS(ph)DTTKK_	Phospho (STY)	sp|O60832|DKC1_HUMAN	1		_AGGSAALS(ph)PSK_	Phospho (STY)	sp|Q92522|H1X_HUMAN	0.952		_AKS(ph)PVPKS(ph)PVEEK_	2 Phospho (STY)	sp|P07197|NFM_HUMAN	1		_ARS(ph)RT(ph)PPSAPSQSR_	2 Phospho (STY)	sp|Q9UQ35|SRRM2_HUMAN	0.997
_ADAASSLTVDVT(ph)PPTAK_	Phospho (STY)	sp|Q9H8Y8|GORS2_HUMAN	0.994		_ADTSQEICS(ph)PR_	Phospho (STY)	sp|P52948|NUP98_HUMAN	1		_ADLNQGIGEPQS(ph)PSRR_	Phospho (STY)	sp|Q96C19|EFHD2_HUMAN	0.957		_ADSGPTQPPLSLS(ph)PAPETK_	Phospho (STY)	sp|O15027|SC16A_HUMAN	0.97		_ADREVQAEQPSSSS(ph)PR_	Phospho (STY)	sp|Q9Y388|RBMX2_HUMAN	0.975		_AES(ph)PESSAIESTQST(ph)PQK_	2 Phospho (STY)	sp|Q9NTI5|PDS5B_HUMAN	0.976		_AGLGS(ph)PERPPK_	Phospho (STY)	sp|Q9H6F5|CCD86_HUMAN	1		_AGLES(ph)GAEPGDGDS(ph)DTTK_	2 Phospho (STY)	sp|O60832|DKC1_HUMAN	0.999		_ALAEEAS(ph)EEELPS(ph)DVDLNDPYFAEEVK_	2 Phospho (STY)	sp|Q9H501|ESF1_HUMAN	1		_ARS(ph)VS(ph)PPPK_	2 Phospho (STY)	sp|Q13247|SRSF6_HUMAN	1
_ADAPDAGAQS(ph)DSELPSYHQNDVSLDR_	Phospho (STY)	sp|Q92538|GBF1_HUMAN	0.987		_ADVGRLS(ph)PEVK_	Phospho (STY)	sp|P49815|TSC2_HUMAN	1		_ADLNQGIGEPQSPS(ph)R_	Phospho (STY)	sp|Q96C19|EFHD2_HUMAN	0.948		_ADTTTPTPTAILAPGS(ph)PAS(ph)PPGSLEPK_	Phospho (STY)	sp|P25440|BRD2_HUMAN	0.988		_ADS(ph)DGAKPEPVAM(ox)AR_	Oxidation (M),Phospho (STY)	sp|Q7Z4V5|HDGR2_HUMAN	1		_AES(ph)PESSAIESTQSTPQK_	Phospho (STY)	sp|Q9NTI5|PDS5B_HUMAN	1		_AGLGS(ph)PERPPKT(ph)SPGS(ph)PR_	3 Phospho (STY)	sp|Q9H6F5|CCD86_HUMAN	0.908		_AGLES(ph)GAEPGDGDS(ph)DTTKK_	2 Phospho (STY)	sp|O60832|DKC1_HUMAN	0.998		_ALAEEAS(ph)EEELPSDVDLNDPYFAEEVK_	Phospho (STY)	sp|Q9H501|ESF1_HUMAN	0.951		_ASAPQS(ph)DEGS(ph)DIDSEPDLPLK_	2 Phospho (STY)	sp|P23760|PAX3_HUMAN	0.922
_ADEASELACPT(ph)PK_	Phospho (STY)	sp|P49327|FAS_HUMAN	1		_AEAPS(ph)S(ph)PDVAPAGK_	Phospho (STY)	sp|Q9P1Y6|PHRF1_HUMAN	1		_ADREVQAEQPSSSS(ph)PR_	Phospho (STY)	sp|Q9Y388|RBMX2_HUMAN	0.987		_ADTTTPTPTAILAPGS(ph)PASPPGSLEPK_	Phospho (STY)	sp|P25440|BRD2_HUMAN	0.924		_ADS(ph)PPPSYPTQQAEQAPNTCECHVCK_	Phospho (STY)	sp|P78312|F193A_HUMAN	0.997		_AES(ph)PSPAPPPGLR_	Phospho (STY)	sp|Q9BUA3|CK084_HUMAN	1		_AGLGS(ph)PERPPKTS(ph)PGS(ph)PR_	3 Phospho (STY)	sp|Q9H6F5|CCD86_HUMAN	0.948		_AGLESGAEPGDGDS(ph)DTTK_	Phospho (STY)	sp|O60832|DKC1_HUMAN	0.994		_ALEEGDGSVSGSS(ph)PR_	Phospho (STY)	sp|Q8N3X1|FNBP4_HUMAN	0.978		_ASAVSELS(ph)PR_	Phospho (STY)	sp|Q9Y2W1|TR150_HUMAN	0.999
_ADEPSS(ph)EES(ph)DLEIDK_	Oxidation (M),Phospho (STY)	sp|P50502|F10A1_HUMAN	0.98		_AEAPSS(ph)PDVAPAGKEDS(ph)PSASGR_	Phospho (STY)	sp|Q9P1Y6|PHRF1_HUMAN	0.819		_ADS(ph)DGAKPEPVAM(ox)AR_	Oxidation (M),Phospho (STY)	sp|Q7Z4V5|HDGR2_HUMAN	1		_ADTTTPTPTAILAPGSPAS(ph)PPGSLEPK_	Phospho (STY)	sp|P25440|BRD2_HUMAN	0.918		_ADSGPTQPPLSLS(ph)PAPETK_	Phospho (STY)	sp|O15027|SC16A_HUMAN	0.982		_AES(ph)PVKEEAVAEVVTITK_	Phospho (STY)	sp|P07197|NFM_HUMAN	1		_AGLQM(ox)KS(ph)PEKK_	Oxidation (M),Phospho (STY)	sp|Q9BRQ0|PYGO2_HUMAN	1		_AGLESGAEPGDGDSDTT(ph)KK_	Phospho (STY)	sp|O60832|DKC1_HUMAN	0.843		_ALES(ph)PERPFLAILGGAK_	Phospho (STY)	sp|P00558|PGK1_HUMAN	1		_ATGDGS(ph)S(ph)PELPSLER_	2 Phospho (STY)	sp|Q9H2Y7|ZN106_HUMAN	0.988
_ADLNQGIGEPQS(ph)PSR_	Phospho (STY)	sp|Q96C19|EFHD2_HUMAN	0.983		_AEDGATPS(ph)PSNETPKK_	Oxidation (M),Phospho (STY)	sp|P29966|MARCS_HUMAN	0.931		_ADS(ph)PPPSYPTQQAEQAPNTCECHVCK_	Phospho (STY)	sp|P78312|F193A_HUMAN	0.996		_ADVGRLS(ph)PEVK_	Phospho (STY)	sp|P49815|TSC2_HUMAN	1		_ADTSQEICS(ph)PR_	Phospho (STY)	sp|P52948|NUP98_HUMAN	1		_AESSSGGGTVPSSAGILEQGPSPGDGS(ph)PPKPK_	Phospho (STY)	sp|Q68EM7|RHG17_HUMAN	1		_AGLS(ph)PANCQSDR_	Phospho (STY)	sp|Q14692|BMS1_HUMAN	1		_AGLGS(ph)PERPPKT(ph)SPGS(ph)PR_	3 Phospho (STY)	sp|Q9H6F5|CCD86_HUMAN	0.935		_ALPTSKPEGSLHSS(ph)PVGPSSSK_	Phospho (STY)	sp|Q9UPT8|ZC3H4_HUMAN	0.94		_ATNES(ph)EDEIPQLVPIGK_	Phospho (STY)	sp|O76021|RL1D1_HUMAN	0.936
_ADLNQGIGEPQS(ph)PSRR_	Phospho (STY)	sp|Q96C19|EFHD2_HUMAN	0.985		_AEDGATPSPSNET(ph)PK_	Phospho (STY)	sp|P29966|MARCS_HUMAN	1		_ADSGPTQPPLSLS(ph)PAPETK_	Phospho (STY)	sp|O15027|SC16A_HUMAN	0.992		_AEDEALLS(ph)EEDDPIDR_	Phospho (STY)	sp|Q04721|NOTC2_HUMAN	1		_ADTTTPTPTAILAPGS(ph)PAS(ph)PPGSLEPK_	2 Phospho (STY)	sp|P25440|BRD2_HUMAN	0.977		_AET(ph)PSANHSESDSLSQHNDFLSDK_	Phospho (STY)	sp|Q9ULM3|YETS2_HUMAN	0.975		_AGS(ph)STPGDAPPAVAEVQGR_	Phospho (STY)	sp|Q7Z6Z7|HUWE1_HUMAN	0.947		_AGLGS(ph)PERPPKTS(ph)PGS(ph)PR_	3 Phospho (STY)	sp|Q9H6F5|CCD86_HUMAN	0.934		_ALS(ph)PVIPLIPR_	Phospho (STY)	sp|O14686|KMT2D_HUMAN	1		_ATVT(ph)PS(ph)PVK_	2 Phospho (STY)	sp|Q9H1E3|NUCKS_HUMAN	1
_ADREVQAEQPSSSS(ph)PR_	Phospho (STY)	sp|Q9Y388|RBMX2_HUMAN	0.998		_AEDGATPSPSNET(ph)PKK_	Phospho (STY)	sp|P29966|MARCS_HUMAN	1		_ADTS(ph)QEICSPR_	Phospho (STY)	sp|P52948|NUP98_HUMAN	0.973		_AEDGATPS(ph)PSNETPK_	Phospho (STY)	sp|P29966|MARCS_HUMAN	0.805		_ADY(ph)M(ox)PETR_	Oxidation (M),Phospho (STY)	sp|Q13635|PTC1_HUMAN	0.98		_AET(ph)PTESVSEPEVATK_	Phospho (STY)	sp|P18858|DNLI1_HUMAN	1		_AHFNAM(ox)FQPSS(ph)PTR_	Oxidation (M),Phospho (STY)	sp|Q8WUA4|TF3C2_HUMAN	0.979		_AGLGSPERPPKT(ph)S(ph)PGSPR_	2 Phospho (STY)	sp|Q9H6F5|CCD86_HUMAN	0.971		_ALSSGGSIT(ph)SPPLSPALPK_	Phospho (STY)	sp|Q6Y7W6|PERQ2_HUMAN	0.807		_AVEES(ph)S(ph)DEERQR_	2 Phospho (STY)	sp|Q9BW71|HIRP3_HUMAN	1
_ADS(ph)DGAKPEPVAM(ox)AR_	Phospho (STY)	sp|Q7Z4V5|HDGR2_HUMAN	1		_AEDKDEGIGS(ph)PDIWEDEK_	Phospho (STY)	sp|Q01664|TFAP4_HUMAN	1		_ADTTTPTPTAILAPGSPASPPGS(ph)LEPK_	Phospho (STY)	sp|P25440|BRD2_HUMAN	0.989		_AEDGATPS(ph)PSNETPKK_	Phospho (STY)	sp|P29966|MARCS_HUMAN	0.994		_AEAPAGPALGLPS(ph)PEAESGVDR_	Phospho (STY)	sp|Q53F19|CQ085_HUMAN	0.995		_AETSEGSGSAPAVPEASAS(ph)PK_	Phospho (STY)	sp|P51608|MECP2_HUMAN	0.971		_AHLS(ph)ENELEALEK_	Phospho (STY)	sp|P98175|RBM10_HUMAN	1		_AGLGSPERPPKT(ph)SPGS(ph)PR_	2 Phospho (STY)	sp|Q9H6F5|CCD86_HUMAN	0.961		_ALSSGGSITS(ph)PPLSPALPK_	Phospho (STY)	sp|Q6Y7W6|PERQ2_HUMAN	0.939		_AVEQEDELS(ph)DVS(ph)QGGSK_	2 Phospho (STY)	sp|O60271|JIP4_HUMAN	0.997
_ADSGPTQPPLSLS(ph)PAPETK_	Phospho (STY)	sp|O15027|SC16A_HUMAN	0.987		_AEEAKDEPPS(ph)EGEAEEEEK_	Phospho (STY)	sp|P07196|NFL_HUMAN	1		_AEAPAGPALGLPS(ph)PEAESGVDR_	Phospho (STY)	sp|Q53F19|CQ085_HUMAN	0.999		_AEDGATPSPS(ph)NET(ph)PK_	Phospho (STY)	sp|P29966|MARCS_HUMAN	0.81		_AEAPAGPALGLPSPEAES(ph)GVDR_	Phospho (STY)	sp|Q53F19|CQ085_HUMAN	0.944		_AEVPGATGGDS(ph)PHLQPAEPPGEPR_	Phospho (STY)	sp|Q9P2K5|MYEF2_HUMAN	0.999		_AHPPVTSAPLS(ph)PPQPNDLYK_	Phospho (STY)	sp|Q4VCS5|AMOT_HUMAN	0.999		_AGM(ox)SSNQS(ph)ISS(ph)PVLDAVPRT(ph)PSR_	Oxidation (M),3 Phospho (STY)	sp|Q9UQ35|SRRM2_HUMAN	0.877		_ALSSLHGDDQDS(ph)EDEVLTIPEVK_	Phospho (STY)	sp|P11717|MPRI_HUMAN	1		_AVPIAVADEGES(ph)ES(ph)EDDDLKPR_	2 Phospho (STY)	sp|Q9Y2K6|UBP20_HUMAN	1
_ADSHEEGS(ph)LEKKAK_	Phospho (STY)	sp|Q5H9F3|BCORL_HUMAN	0.957		_AEEAQKT(ph)ESVDNEGE_	Phospho (STY)	sp|Q15651|HMGN3_HUMAN	0.903		_AEAPPLEREDS(ph)GTFSLGK_	Phospho (STY)	sp|O75569|PRKRA_HUMAN	0.967		_AEDGATPSPSNET(ph)PK_	Phospho (STY)	sp|P29966|MARCS_HUMAN	1		_AEAPS(ph)S(ph)PDVAPAGKEDS(ph)PSASGR_	3 Phospho (STY)	sp|Q9P1Y6|PHRF1_HUMAN	0.92		_AFAAVPTSHPPEDAPAQPPTPGPAAS(ph)PEQLSFR_	Phospho (STY)	sp|Q14160|SCRIB_HUMAN	0.999		_AIGSTSKPQES(ph)PK_	Phospho (STY)	sp|P18887|XRCC1_HUMAN	1		_AGM(ox)SSNQSISS(ph)PVLDAVPRT(ph)PSR_	Oxidation (M),2 Phospho (STY)	sp|Q9UQ35|SRRM2_HUMAN	0.9		_ALVAT(ph)PGKK_	Phospho (STY)	sp|P19338|NUCL_HUMAN	1		_CDS(ph)T(ph)QPLLAGLT(ph)PS(ph)PK_	4 Phospho (STY)	sp|Q99062|CSF3R_HUMAN	1
_ADTTTPTPTAILAPGSPAS(ph)PPGSLEPK_	Phospho (STY)	sp|P25440|BRD2_HUMAN	0.926		_AEEAQKTES(ph)VDNEGE_	Phospho (STY)	sp|Q15651|HMGN3_HUMAN	0.891		_AEAPSS(ph)PDVAPAGKEDS(ph)PSASGR_	2 Phospho (STY)	sp|Q9P1Y6|PHRF1_HUMAN	0.838		_AEDGATPSPSNET(ph)PKK_	Phospho (STY)	sp|P29966|MARCS_HUMAN	1		_AEAPSS(ph)PDVAPAGK_	Phospho (STY)	sp|Q9P1Y6|PHRF1_HUMAN	0.895		_AFGSGIDIKPGT(ph)PPIAGR_	Phospho (STY)	sp|Q9Y520|PRC2C_HUMAN	1		_AITSLLGGGS(ph)PK_	Phospho (STY)	sp|Q6KC79|NIPBL_HUMAN	1		_AGSS(ph)T(ph)PGDAPPAVAEVQGR_	2 Phospho (STY)	sp|Q7Z6Z7|HUWE1_HUMAN	0.816		_ALVDTLKFVT(ph)QAEGAKQT(ph)EAT(ph)M(ox)T(ph)FK_	Oxidation (M),4 Phospho (STY)	sp|P04114|APOB_HUMAN	0.918		_CGSGPVHISGQHLVAVEEDAES(ph)EDEEEEDVK_	Phospho (STY)	sp|P06748|NPM_HUMAN	1
_AEAPAGPALGLPS(ph)PEAESGVDR_	Phospho (STY)	sp|Q53F19|CQ085_HUMAN	1		_AEEDEILNRS(ph)PR_	Phospho (STY)	sp|P27824|CALX_HUMAN	1		_AEDEALLS(ph)EEDDPIDR_	Phospho (STY)	sp|Q04721|NOTC2_HUMAN	1		_AEDKDEGIGS(ph)PDIWEDEK_	2 Phospho (STY)	sp|Q01664|TFAP4_HUMAN	1		_AEAPSS(ph)PDVAPAGKEDS(ph)PSASGR_	2 Phospho (STY)	sp|Q9P1Y6|PHRF1_HUMAN	0.873		_AFVEDS(ph)EDEDGAGEGGSSLLQK_	Phospho (STY)	sp|Q8N9T8|KRI1_HUMAN	1		_AKNS(ph)PPQAPSTR_	Phospho (STY)	sp|Q8N1F8|S11IP_HUMAN	1		_AIGSTSKPQES(ph)PK_	Phospho (STY)	sp|P18887|XRCC1_HUMAN	1		_ALVEFESNPEETREPGS(ph)PPSVQR_	Phospho (STY)	sp|Q9H6F5|CCD86_HUMAN	1		_CT(ph)SPRSS(ph)DTEENVK_	2 Phospho (STY)	sp|P01106|MYC_HUMAN	0.854
_AEAPPLEREDS(ph)GTFSLGK_	Phospho (STY)	sp|O75569|PRKRA_HUMAN	0.969		_AEEKS(ph)PISINVK_	Phospho (STY)	sp|Q9UK58|CCNL1_HUMAN	1		_AEDGATPS(ph)PSNETPK_	Phospho (STY)	sp|P29966|MARCS_HUMAN	0.833		_AEEAKDEPPS(ph)EGEAEEEEK_	Phospho (STY)	sp|P07196|NFL_HUMAN	1		_AEDEALLS(ph)EEDDPIDR_	Phospho (STY)	sp|Q04721|NOTC2_HUMAN	1		_AGAAAGDS(ph)DEESRADDK_	Phospho (STY)	sp|O95365|ZBT7A_HUMAN	1		_AKPAM(ox)PQDSVPS(ph)PR_	Oxidation (M),Phospho (STY)	sp|P53396|ACLY_HUMAN	0.999		_AIS(ph)APTSPT(ph)R_	2 Phospho (STY)	sp|Q9NQG6|MID51_HUMAN	0.921		_ALVVPEPEPDSDS(ph)NQER_	Phospho (STY)	sp|Q5VTR2|BRE1A_HUMAN	0.934		_DAS(ph)PINRWS(ph)PTR_	2 Phospho (STY)	sp|Q13523|PRP4B_HUMAN	0.994
_AEDGATPS(ph)PSNET(ph)PK_	Phospho (STY)	sp|P29966|MARCS_HUMAN	0.853		_AEENTDQAS(ph)PQEDYAGFER_	Phospho (STY)	sp|Q9NU22|MDN1_HUMAN	1		_AEDGATPS(ph)PSNETPKK_	Phospho (STY)	sp|P29966|MARCS_HUMAN	0.929		_AEEAQKTES(ph)VDNEGE_	Phospho (STY)	sp|Q15651|HMGN3_HUMAN	0.829		_AEDGATPS(ph)PSNETPKK_	Phospho (STY)	sp|P29966|MARCS_HUMAN	0.979		_AGAEDDEEKGEGT(ph)PREEGK_	Phospho (STY)	sp|Q86VM9|ZCH18_HUMAN	1		_AKPPADPAAAAS(ph)PCR_	Phospho (STY)	sp|Q9GZT9|EGLN1_HUMAN	1		_AITSLLGGGS(ph)PK_	Phospho (STY)	sp|Q6KC79|NIPBL_HUMAN	0.997		_AM(ox)ET(ph)RAMETEVLET(ph)RVMER_	Oxidation (M),2 Phospho (STY)	sp|Q9H0L4|CSTFT_HUMAN	0.852		_DCLIEDS(ph)DDEAGQS_	Phospho (STY)	sp|Q2VPK5|CTU2_HUMAN	1
_AEDGATPS(ph)PSNETPK_	Phospho (STY)	sp|P29966|MARCS_HUMAN	0.829		_AEFTS(ph)PPSLFK_	Phospho (STY)	sp|Q6UN15|FIP1_HUMAN	0.957		_AEDGATPSPS(ph)NET(ph)PK_	2 Phospho (STY)	sp|P29966|MARCS_HUMAN	0.804		_AEEDEILNRS(ph)PR_	Phospho (STY)	sp|P27824|CALX_HUMAN	1		_AEDGATPSPS(ph)NET(ph)PK_	2 Phospho (STY)	sp|P29966|MARCS_HUMAN	0.9		_AGDLLEDS(ph)PK_	Phospho (STY)	sp|P51858|HDGF_HUMAN	1		_AKS(ph)PISSGSGGSHM(ox)SGTSSSSGM(ox)K_	2 Oxidation (M),Phospho (STY)	sp|Q15648|MED1_HUMAN	0.999		_AKS(ph)PT(ph)PDGSER_	2 Phospho (STY)	sp|Q96MU7|YTDC1_HUMAN	0.994		_AMET(ph)RAM(ox)ETEVLET(ph)RVMER_	Oxidation (M),2 Phospho (STY)	sp|Q9H0L4|CSTFT_HUMAN	0.889		_DDEEKPKIEDVGS(ph)DEEDDSGK_	Phospho (STY)	sp|P08238|HS90B_HUMAN	1
_AEDGATPS(ph)PSNETPKK_	Phospho (STY)	sp|P29966|MARCS_HUMAN	0.957		_AEGEPQEES(ph)PLK_	Oxidation (M),2 Phospho (STY)	sp|Q9NYF8|BCLF1_HUMAN	1		_AEDGATPSPS(ph)NETPKK_	Phospho (STY)	sp|P29966|MARCS_HUMAN	0.913		_AEEKS(ph)PISINVK_	Oxidation (M),2 Phospho (STY)	sp|Q9UK58|CCNL1_HUMAN	1		_AEDGATPSPSNET(ph)PK_	Phospho (STY)	sp|P29966|MARCS_HUMAN	1		_AGDLLEDS(ph)PKRPK_	Phospho (STY)	sp|P51858|HDGF_HUMAN	1		_AKS(ph)PVPKS(ph)PVEEAK_	2 Phospho (STY)	sp|P07197|NFM_HUMAN	1		_AKS(ph)PT(ph)PSPS(ph)PPR_	3 Phospho (STY)	sp|Q8IYB3|SRRM1_HUMAN	0.87		_AMETRAM(ox)ET(ph)EVLET(ph)RVMER_	Oxidation (M),2 Phospho (STY)	sp|Q9H0L4|CSTFT_HUMAN	0.983		_DDEEKPKIEDVGS(ph)DEEDDSGKDK_	Phospho (STY)	sp|P08238|HS90B_HUMAN	0.979
_AEDGATPSPS(ph)NETPKK_	Phospho (STY)	sp|P29966|MARCS_HUMAN	0.81		_AEGEWEDQEALDYFS(ph)DK_	Phospho (STY)	sp|Q9NYF8|BCLF1_HUMAN	1		_AEDGATPSPSNET(ph)PK_	Phospho (STY)	sp|P29966|MARCS_HUMAN	1		_AEENTDQAS(ph)PQEDYAGFER_	Phospho (STY)	sp|Q9NU22|MDN1_HUMAN	1		_AEDGATPSPSNET(ph)PKK_	Phospho (STY)	sp|P29966|MARCS_HUMAN	0.971		_AGDPGEM(ox)PQS(ph)PTGLGQPK_	Oxidation (M),Phospho (STY)	sp|Q9UIF9|BAZ2A_HUMAN	0.888		_AKS(ph)PVPKS(ph)PVEEK_	2 Phospho (STY)	sp|P07197|NFM_HUMAN	1		_AKS(ph)PVPKS(ph)PVEEAK_	2 Phospho (STY)	sp|P07197|NFM_HUMAN	1		_AMETRAMET(ph)EVLET(ph)RVM(ox)ER_	Oxidation (M),2 Phospho (STY)	sp|Q9H0L4|CSTFT_HUMAN	0.972		_DDEEKPKIEDVGSDEEDDS(ph)GKDK_	Phospho (STY)	sp|P08238|HS90B_HUMAN	0.995
_AEDGATPSPSNET(ph)PK_	Phospho (STY)	sp|P29966|MARCS_HUMAN	1		_AEGEWEDQEALDYFS(ph)DKESGK_	Phospho (STY)	sp|Q9NYF8|BCLF1_HUMAN	0.856		_AEDGATPSPSNET(ph)PKK_	Phospho (STY)	sp|P29966|MARCS_HUMAN	1		_AEFTS(ph)PPSLFK_	2 Phospho (STY)	sp|Q6UN15|FIP1_HUMAN	0.989		_AEDS(ph)DSEPEPEDNVR_	Phospho (STY)	sp|Q9H0D6|XRN2_HUMAN	1		_AGDPGEMPQSPT(ph)GLGQPK_	Phospho (STY)	sp|Q9UIF9|BAZ2A_HUMAN	0.878		_ALPQT(ph)PRPR_	Phospho (STY)	sp|Q9UQ35|SRRM2_HUMAN	1		_AKS(ph)PVPKS(ph)PVEEK_	2 Phospho (STY)	sp|P07197|NFM_HUMAN	1		_ANS(ph)FVGTAQYVSPELLTEK_	Phospho (STY)	sp|Q6A1A2|PDPK2_HUMAN	1		_DDFES(ph)EEEDVK_	Phospho (STY)	sp|Q7Z6E9|RBBP6_HUMAN	1
_AEDGATPSPSNET(ph)PKK_	Phospho (STY)	sp|P29966|MARCS_HUMAN	1		_AELEEM(ox)EEVHPS(ph)DEEEEDATK_	Phospho (STY)	sp|P78559|MAP1A_HUMAN	0.998		_AEDKDEGIGS(ph)PDIWEDEK_	Phospho (STY)	sp|Q01664|TFAP4_HUMAN	1		_AEGEPQEES(ph)PLK_	Phospho (STY)	sp|Q9NYF8|BCLF1_HUMAN	1		_AEEAKDEPPS(ph)EGEAEEEEK_	Phospho (STY)	sp|P07196|NFL_HUMAN	1		_AGDTS(ph)DQEGHSLEEK_	Phospho (STY)	sp|Q99607|ELF4_HUMAN	0.998		_ALPSLNTGSSS(ph)PR_	Phospho (STY)	sp|O14545|TRAD1_HUMAN	0.94		_ALAAGADS(ph)PKTEEARPSPAPGPGT(ph)PT(ph)GTPTR_	3 Phospho (STY)	sp|Q4KMP7|TB10B_HUMAN	0.879		_ANS(ph)PEKPPEAGAAHKPR_	Phospho (STY)	sp|Q9UFC0|LRWD1_HUMAN	1		_DEILPT(ph)TPISEQK_	Phospho (STY)	sp|P23396|RS3_HUMAN	0.917
_AEDS(ph)DSEPEPEDNVR_	Oxidation (M),2 Phospho (STY)	sp|Q9H0D6|XRN2_HUMAN	1		_AENGERS(ph)DLEEDNER_	Phospho (STY)	sp|Q8WU90|ZC3HF_HUMAN	1		_AEDS(ph)DSEPEPEDNVR_	Phospho (STY)	sp|Q9H0D6|XRN2_HUMAN	1		_AEGEWEDQEALDYFS(ph)DK_	Phospho (STY)	sp|Q9NYF8|BCLF1_HUMAN	1		_AEEAQKTES(ph)VDNEGE_	Phospho (STY)	sp|Q15651|HMGN3_HUMAN	0.956		_AGEPDGES(ph)LDEQPSSSSSK_	Phospho (STY)	sp|Q9H3Q1|BORG4_HUMAN	1		_ALPTSKPEGSLHSS(ph)PVGPSSSK_	Phospho (STY)	sp|Q9UPT8|ZC3H4_HUMAN	0.858		_ALPNNTSSS(ph)PQPK_	Phospho (STY)	sp|P04637|P53_HUMAN	0.943		_APIDTS(ph)DVEEK_	Phospho (STY)	sp|Q06265|EXOS9_HUMAN	0.987		_DELAELS(ph)EAES(ph)EGDEKPK_	2 Phospho (STY)	sp|Q3L8U1|CHD9_HUMAN	1
_AEEAKDEPPS(ph)EGEAEEEEK_	Phospho (STY)	sp|P07196|NFL_HUMAN	1		_AEPSEVDM(ox)NS(ph)PK_	Phospho (STY)	sp|Q9NR30|DDX21_HUMAN	1		_AEEAKDEPPS(ph)EGEAEEEEK_	Phospho (STY)	sp|P07196|NFL_HUMAN	1		_AELEEM(ox)EEVHPS(ph)DEEEEDATK_	Phospho (STY)	sp|P78559|MAP1A_HUMAN	0.893		_AEEDEILNRS(ph)PR_	Phospho (STY)	sp|P27824|CALX_HUMAN	1		_AGEPNS(ph)PDAEEANSPDVTAGCDPAGVHPPR_	Phospho (STY)	sp|Q08J23|NSUN2_HUMAN	1		_ALVEFESNPEETREPGS(ph)PPSVQR_	Phospho (STY)	sp|Q9H6F5|CCD86_HUMAN	0.804		_ALPSLNTGSSS(ph)PR_	Phospho (STY)	sp|O14545|TRAD1_HUMAN	0.868		_APPQTHLPSGASSGTGSASATHGGGS(ph)PPGTR_	Phospho (STY)	sp|P46379|BAG6_HUMAN	0.992		_DGETLEGS(ph)DAEESLDK_	Phospho (STY)	sp|Q9P2D1|CHD7_HUMAN	1
_AEEAQKTES(ph)VDNEGE_	Phospho (STY)	sp|Q15651|HMGN3_HUMAN	0.978		_AES(ph)DGEEKEEVK_	Phospho (STY)	sp|O75691|UTP20_HUMAN	1		_AEEAQKTES(ph)VDNEGE_	Phospho (STY)	sp|Q15651|HMGN3_HUMAN	0.992		_AELEEMEEVHPS(ph)DEEEEDATK_	Phospho (STY)	sp|P78559|MAP1A_HUMAN	0.814		_AEEKS(ph)PISINVK_	Phospho (STY)	sp|Q9UK58|CCNL1_HUMAN	1		_AGEPNSPDAEEANS(ph)PDVTAGCDPAGVHPPR_	Phospho (STY)	sp|Q08J23|NSUN2_HUMAN	1		_ALVVPEPEPDSDS(ph)NQER_	Phospho (STY)	sp|Q5VTR2|BRE1A_HUMAN	0.989		_ALSSGGSITS(ph)PPLS(ph)PALPK_	2 Phospho (STY)	sp|Q6Y7W6|PERQ2_HUMAN	0.984		_APQTS(ph)S(ph)SPPPVR_	2 Phospho (STY)	sp|Q8IYB3|SRRM1_HUMAN	0.882		_DGGS(ph)GNS(ph)TIIVSR_	2 Phospho (STY)	sp|Q7Z6Z7|HUWE1_HUMAN	0.859
_AEEDEILNRS(ph)PR_	Phospho (STY)	sp|P27824|CALX_HUMAN	1		_AES(ph)PAEKVPEESVLPLVQK_	Phospho (STY)	sp|Q9UKV3|ACINU_HUMAN	1		_AEEDEILNRS(ph)PR_	Phospho (STY)	sp|P27824|CALX_HUMAN	1		_AENGERS(ph)DLEEDNER_	Phospho (STY)	sp|Q8WU90|ZC3HF_HUMAN	1		_AEENTDQAS(ph)PQEDYAGFER_	Phospho (STY)	sp|Q9NU22|MDN1_HUMAN	1		_AGGPTT(ph)PLS(ph)PTR_	2 Phospho (STY)	sp|P20700|LMNB1_HUMAN	0.962		_ANS(ph)PEKPPEAGAAHKPR_	Phospho (STY)	sp|Q9UFC0|LRWD1_HUMAN	1		_ALVEFESNPEETREPGS(ph)PPSVQR_	Phospho (STY)	sp|Q9H6F5|CCD86_HUMAN	0.836		_APQTSSS(ph)PPPVR_	Phospho (STY)	sp|Q8IYB3|SRRM1_HUMAN	0.919		_DGQDAIAQS(ph)PEK_	Phospho (STY)	sp|Q9NWH9|SLTM_HUMAN	1
_AEEKS(ph)PISINVK_	Phospho (STY)	sp|Q9UK58|CCNL1_HUMAN	1		_AES(ph)PDLR_	Phospho (STY)	sp|Q6UN15|FIP1_HUMAN	1		_AEEKS(ph)PISINVK_	Phospho (STY)	sp|Q9UK58|CCNL1_HUMAN	1		_AEPSEVDM(ox)NS(ph)PK_	Phospho (STY)	sp|Q9NR30|DDX21_HUMAN	0.999		_AEFTS(ph)PPSLFK_	Phospho (STY)	sp|Q6UN15|FIP1_HUMAN	0.963		_AGGPTT(ph)PLSPTR_	Phospho (STY)	sp|P20700|LMNB1_HUMAN	0.998		_APAASEGNHTDGAEEAAGSCAQAPSHS(ph)PPNKPK_	Phospho (STY)	sp|Q92560|BAP1_HUMAN	0.818		_ALVVPEPEPDS(ph)DS(ph)NQER_	2 Phospho (STY)	sp|Q5VTR2|BRE1A_HUMAN	1		_APVPSTCSSTFPEELS(ph)PPSHQAK_	Phospho (STY)	sp|Q14980|NUMA1_HUMAN	1		_DGSS(ph)PPLLEK_	Phospho (STY)	sp|Q6W2J9|BCOR_HUMAN	0.954
_AEENTDQAS(ph)PQEDYAGFER_	Phospho (STY)	sp|Q9NU22|MDN1_HUMAN	1		_AES(ph)PESSAIESTQST(ph)PQK_	Phospho (STY)	sp|Q9NTI5|PDS5B_HUMAN	0.933		_AEENTDQAS(ph)PQEDYAGFER_	Phospho (STY)	sp|Q9NU22|MDN1_HUMAN	1		_AES(ph)PAEKVPEESVLPLVQK_	Phospho (STY)	sp|Q9UKV3|ACINU_HUMAN	1		_AEGEPQEES(ph)PLK_	Phospho (STY)	sp|Q9NYF8|BCLF1_HUMAN	1		_AGGSAALS(ph)PSK_	Phospho (STY)	sp|Q92522|H1X_HUMAN	0.997		_APIDTS(ph)DVEEK_	Phospho (STY)	sp|Q06265|EXOS9_HUMAN	0.987		_ALVVPEPEPDSDS(ph)NQER_	Phospho (STY)	sp|Q5VTR2|BRE1A_HUMAN	0.992		_APVQPQQS(ph)PAAAPGGTDEKPSGK_	Phospho (STY)	sp|Q13200|PSMD2_HUMAN	1		_DHS(ph)DS(ph)DDQM(ox)LVAK_	Oxidation (M),2 Phospho (STY)	sp|Q9NW75|GPTC2_HUMAN	1
_AEFTS(ph)PPSLFK_	Phospho (STY)	sp|Q6UN15|FIP1_HUMAN	0.983		_AES(ph)PESSAIESTQSTPQK_	Phospho (STY)	sp|Q9NTI5|PDS5B_HUMAN	1		_AEFTS(ph)PPSLFK_	Phospho (STY)	sp|Q6UN15|FIP1_HUMAN	0.955		_AES(ph)PDLR_	Phospho (STY)	sp|Q6UN15|FIP1_HUMAN	1		_AEGEWEDQEALDYFS(ph)DK_	Phospho (STY)	sp|Q9NYF8|BCLF1_HUMAN	1		_AGLES(ph)GAEPGDGDS(ph)DTTK_	2 Phospho (STY)	sp|O60832|DKC1_HUMAN	0.988		_APPQTHLPSGASSGTGSASATHGGGS(ph)PPGTR_	Phospho (STY)	sp|P46379|BAG6_HUMAN	0.981		_ANT(ph)PDS(ph)DITEK_	2 Phospho (STY)	sp|Q9H4L7|SMRCD_HUMAN	0.991		_AQAVS(ph)EEEEEEEGK_	Phospho (STY)	sp|Q9GZR7|DDX24_HUMAN	1		_DHS(ph)PTPS(ph)VFNSDEER_	2 Phospho (STY)	sp|Q6UN15|FIP1_HUMAN	0.961
_AEGDSAGTAGT(ph)PGGTPAGDK_	Phospho (STY)	sp|Q92925|SMRD2_HUMAN	0.992		_AES(ph)PSPAPPPGLR_	2 Phospho (STY)	sp|Q9BUA3|CK084_HUMAN	1		_AEGDSAGTAGT(ph)PGGTPAGDK_	Phospho (STY)	sp|Q92925|SMRD2_HUMAN	0.974		_AES(ph)PESSAIESTQST(ph)PQK_	Phospho (STY)	sp|Q9NTI5|PDS5B_HUMAN	1		_AEGEWEDQEALDYFS(ph)DKESGK_	Phospho (STY)	sp|Q9NYF8|BCLF1_HUMAN	0.858		_AGLES(ph)GAEPGDGDS(ph)DTTKK_	2 Phospho (STY)	sp|O60832|DKC1_HUMAN	0.956		_APQTS(ph)S(ph)SPPPVR_	2 Phospho (STY)	sp|Q8IYB3|SRRM1_HUMAN	0.898		_APIDT(ph)SDVEEK_	Phospho (STY)	sp|Q06265|EXOS9_HUMAN	0.827		_AQGEPVAGHES(ph)PK_	Phospho (STY)	sp|O94979|SC31A_HUMAN	1		_DHS(ph)PTPS(ph)VFNSDEERYR_	2 Phospho (STY)	sp|Q6UN15|FIP1_HUMAN	0.815
_AEGEPQEES(ph)PLK_	Phospho (STY)	sp|Q9NYF8|BCLF1_HUMAN	1		_AES(ph)PVKEEAVAEVVTITK_	2 Phospho (STY)	sp|P07197|NFM_HUMAN	1		_AEGEPQEES(ph)PLK_	Phospho (STY)	sp|Q9NYF8|BCLF1_HUMAN	1		_AES(ph)PESSAIESTQSTPQK_	2 Phospho (STY)	sp|Q9NTI5|PDS5B_HUMAN	1		_AELEEM(ox)EEVHPS(ph)DEEEEDATK_	Oxidation (M),Phospho (STY)	sp|P78559|MAP1A_HUMAN	0.993		_AGLES(ph)GAEPGDGDSDTTK_	Phospho (STY)	sp|O60832|DKC1_HUMAN	1		_APQTSSS(ph)PPPVR_	Phospho (STY)	sp|Q8IYB3|SRRM1_HUMAN	0.919		_APIDTS(ph)DVEEK_	Phospho (STY)	sp|Q06265|EXOS9_HUMAN	0.988		_AQGEPVAGHES(ph)PKIPYEK_	Phospho (STY)	sp|O94979|SC31A_HUMAN	0.999		_DHS(ph)PTPSVFNS(ph)DEER_	2 Phospho (STY)	sp|Q6UN15|FIP1_HUMAN	0.94
_AEGEWEDQEALDYFS(ph)DK_	Phospho (STY)	sp|Q9NYF8|BCLF1_HUMAN	1		_AESSSGGGTVPSSAGILEQGPSPGDGS(ph)PPKPK_	2 Phospho (STY)	sp|Q68EM7|RHG17_HUMAN	1		_AELEEM(ox)EEVHPS(ph)DEEEEDATK_	Oxidation (M),Phospho (STY)	sp|P78559|MAP1A_HUMAN	0.94		_AES(ph)PSPAPPPGLR_	2 Phospho (STY)	sp|Q9BUA3|CK084_HUMAN	1		_AENGERS(ph)DLEEDNER_	Phospho (STY)	sp|Q8WU90|ZC3HF_HUMAN	1		_AGLESGAEPGDGDS(ph)DTTK_	Phospho (STY)	sp|O60832|DKC1_HUMAN	0.991		_APS(ph)DSSLGTPSDGRPELR_	Phospho (STY)	sp|Q15642|CIP4_HUMAN	0.948		_APQTS(ph)SS(ph)PPPVR_	2 Phospho (STY)	sp|Q8IYB3|SRRM1_HUMAN	0.821		_AQQQEEQGS(ph)VNDVKEEEK_	Phospho (STY)	sp|Q9Y4W2|LAS1L_HUMAN	1		_DHS(ph)PTPSVFNSDEER_	Phospho (STY)	sp|Q6UN15|FIP1_HUMAN	0.975
_AEGEWEDQEALDYFS(ph)DKESGK_	Phospho (STY)	sp|Q9NYF8|BCLF1_HUMAN	0.996		_AET(ph)EEAEEPEEDGEEHVCVSASK_	Phospho (STY)	sp|P46821|MAP1B_HUMAN	1		_AENGERS(ph)DLEEDNER_	Phospho (STY)	sp|Q8WU90|ZC3HF_HUMAN	1		_AES(ph)PVKEEAVAEVVTITK_	Phospho (STY)	sp|P07197|NFM_HUMAN	1		_AEPSEVDM(ox)NS(ph)PK_	Oxidation (M),Phospho (STY)	sp|Q9NR30|DDX21_HUMAN	1		_AGLESGAEPGDGDS(ph)DTTKK_	Phospho (STY)	sp|O60832|DKC1_HUMAN	0.99		_APS(ph)PPPTASNSSNSQSEK_	Phospho (STY)	sp|Q8N108|MIER1_HUMAN	1		_APQTS(ph)SS(ph)PPPVRR_	2 Phospho (STY)	sp|Q8IYB3|SRRM1_HUMAN	0.936		_AQT(ph)PPGPSLSGSK_	Phospho (STY)	sp|Q9UQ35|SRRM2_HUMAN	1		_DHSPT(ph)PSVFNSDEER_	Phospho (STY)	sp|Q6UN15|FIP1_HUMAN	0.818
_AELEEM(ox)EEVHPS(ph)DEEEEDATK_	Phospho (STY)	sp|P78559|MAP1A_HUMAN	0.986		_AET(ph)PSANHSESDSLSQHNDFLSDK_	Phospho (STY)	sp|Q9ULM3|YETS2_HUMAN	0.996		_AEPSEVDM(ox)NS(ph)PK_	Oxidation (M),Phospho (STY)	sp|Q9NR30|DDX21_HUMAN	1		_AESSSGGGTVPSSAGILEQGPSPGDGS(ph)PPKPK_	3 Phospho (STY)	sp|Q68EM7|RHG17_HUMAN	1		_AES(ph)DGEEKEEVK_	Phospho (STY)	sp|O75691|UTP20_HUMAN	1		_AGLGS(ph)PERPPK_	Phospho (STY)	sp|Q9H6F5|CCD86_HUMAN	1		_APVPSTCSSTFPEELS(ph)PPSHQAK_	Phospho (STY)	sp|Q14980|NUMA1_HUMAN	1		_APQTSSS(ph)PPPVR_	Phospho (STY)	sp|Q8IYB3|SRRM1_HUMAN	0.917		_AQT(ph)PPGPSLSGSKS(ph)PCPQEK_	2 Phospho (STY)	sp|Q9UQ35|SRRM2_HUMAN	0.987		_DIEIS(ph)T(ph)EEEK_	2 Phospho (STY)	sp|Q4G0J3|LARP7_HUMAN	1
_AENGERS(ph)DLEEDNER_	Phospho (STY)	sp|Q8WU90|ZC3HF_HUMAN	1		_AET(ph)PTESVSEPEVATK_	2 Phospho (STY)	sp|P18858|DNLI1_HUMAN	1		_AES(ph)DGEEKEEVK_	Phospho (STY)	sp|O75691|UTP20_HUMAN	1		_AET(ph)EEAEEPEEDGEEHVCVSASK_	Phospho (STY)	sp|P46821|MAP1B_HUMAN	1		_AES(ph)PAEKVPEESVLPLVQK_	Phospho (STY)	sp|Q9UKV3|ACINU_HUMAN	1		_AGLS(ph)PANCQSDR_	Phospho (STY)	sp|Q14692|BMS1_HUMAN	1		_APVQPQQS(ph)PAAAPGGTDEKPSGK_	Phospho (STY)	sp|Q13200|PSMD2_HUMAN	1		_APS(ph)AS(ph)PLALHASR_	2 Phospho (STY)	sp|Q8N3F8|MILK1_HUMAN	1		_AQTLPTSVVTITSESS(ph)PGKR_	Phospho (STY)	sp|Q01082|SPTB2_HUMAN	0.987		_DIEIS(ph)T(ph)EEEKDTGDLK_	2 Phospho (STY)	sp|Q4G0J3|LARP7_HUMAN	1
_AEPSEVDM(ox)NS(ph)PK_	Phospho (STY)	sp|Q9NR30|DDX21_HUMAN	1		_AEVPGATGGDS(ph)PHLQPAEPPGEPR_	Phospho (STY)	sp|Q9P2K5|MYEF2_HUMAN	1		_AES(ph)PAEKVPEESVLPLVQK_	Phospho (STY)	sp|Q9UKV3|ACINU_HUMAN	1		_AET(ph)PSANHSESDSLSQHNDFLSDK_	Phospho (STY)	sp|Q9ULM3|YETS2_HUMAN	0.994		_AES(ph)PDLR_	Phospho (STY)	sp|Q6UN15|FIP1_HUMAN	1		_AGM(ox)SSNQSISS(ph)PVLDAVPR_	Oxidation (M),Phospho (STY)	sp|Q9UQ35|SRRM2_HUMAN	0.953		_APVSGSRS(ph)PDREASGSGGR_	Phospho (STY)	sp|Q8N5F7|NKAP_HUMAN	0.993		_APS(ph)DS(ph)SLGTPSDGRPELR_	2 Phospho (STY)	sp|Q15642|CIP4_HUMAN	0.906		_ARSRT(ph)PPS(ph)APSQSR_	2 Phospho (STY)	sp|Q9UQ35|SRRM2_HUMAN	0.963		_DIEVLS(ph)EDT(ph)DYEEDEVTK_	2 Phospho (STY)	sp|Q4LE39|ARI4B_HUMAN	1
_AES(ph)DGEEKEEVK_	Phospho (STY)	sp|O75691|UTP20_HUMAN	1		_AFGPGLQGGSAGS(ph)PAR_	Phospho (STY)	sp|P21333|FLNA_HUMAN	1		_AES(ph)PDLR_	Phospho (STY)	sp|Q6UN15|FIP1_HUMAN	1		_AET(ph)PTESVSEPEVATK_	Phospho (STY)	sp|P18858|DNLI1_HUMAN	1		_AES(ph)PESSAIESTQST(ph)PQK_	2 Phospho (STY)	sp|Q9NTI5|PDS5B_HUMAN	0.969		_AGMSSNQSISS(ph)PVLDAVPR_	Phospho (STY)	sp|Q9UQ35|SRRM2_HUMAN	0.874		_AQAVS(ph)EEEEEEEGK_	Phospho (STY)	sp|Q9GZR7|DDX24_HUMAN	1		_APS(ph)PPPPGS(ph)EAAPSPSK_	2 Phospho (STY)	sp|Q96GP6|SREC2_HUMAN	0.868		_AS(ph)LAGWLPSSM(ox)TR_	Oxidation (M),Phospho (STY)	sp|P21675|TAF1_HUMAN	1		_DIEVLS(ph)EDT(ph)DYEEDEVTKK_	2 Phospho (STY)	sp|Q4LE39|ARI4B_HUMAN	0.993
_AES(ph)PAEKVPEESVLPLVQK_	2 Oxidation (M),Phospho (STY)	sp|Q9UKV3|ACINU_HUMAN	1		_AFGSGIDIKPGT(ph)PPIAGR_	Phospho (STY)	sp|Q9Y520|PRC2C_HUMAN	1		_AES(ph)PDLRR_	Phospho (STY)	sp|Q6UN15|FIP1_HUMAN	1		_AETASQS(ph)QRSPISDNSGCDAPGNSNPSLSVPSSAESEK_	Phospho (STY)	sp|Q99590|SCAFB_HUMAN	0.804		_AES(ph)PESSAIESTQSTPQK_	Phospho (STY)	sp|Q9NTI5|PDS5B_HUMAN	1		_AGPDLPSLPSHALEDEGWAAAAPS(ph)PGS(ph)AR_	2 Phospho (STY)	sp|Q9H3Q1|BORG4_HUMAN	0.999		_AQDGENEKNS(ph)EKEQDSEVSEDTK_	Phospho (STY)	sp|Q92922|SMRC1_HUMAN	1		_APVQPQQS(ph)PAAAPGGTDEKPSGK_	Phospho (STY)	sp|Q13200|PSMD2_HUMAN	1		_AS(ph)PAPGSGHPEGPGAHLDMNSLDR_	Phospho (STY)	sp|O94826|TOM70_HUMAN	0.995		_DKEVS(ph)DDEAEEK_	Phospho (STY)	sp|P07900|HS90A_HUMAN	1
_AES(ph)PDLR_	Phospho (STY)	sp|Q6UN15|FIP1_HUMAN	1		_AFLAELEQNS(ph)PK_	2 Phospho (STY)	sp|Q9UPN3|MACF1_HUMAN	1		_AES(ph)PESSAIESTQST(ph)PQK_	2 Phospho (STY)	sp|Q9NTI5|PDS5B_HUMAN	0.993		_AEVPGATGGDS(ph)PHLQPAEPPGEPR_	Phospho (STY)	sp|Q9P2K5|MYEF2_HUMAN	1		_AES(ph)PSPAPPPGLR_	Phospho (STY)	sp|Q9BUA3|CK084_HUMAN	1		_AGPDLPSLPSHALEDEGWAAAAPS(ph)PGSAR_	Phospho (STY)	sp|Q9H3Q1|BORG4_HUMAN	0.943		_AQGEPVAGHES(ph)PKIPYEK_	Phospho (STY)	sp|O94979|SC31A_HUMAN	0.998		_AQAVS(ph)EEEEEEEGK_	Phospho (STY)	sp|Q9GZR7|DDX24_HUMAN	1		_AS(ph)SPPDRIDIFGR_	Phospho (STY)	sp|Q9NWB6|ARGL1_HUMAN	0.907		_DKKDEEEDM(ox)S(ph)LD_	Oxidation (M),Phospho (STY)	sp|Q16186|ADRM1_HUMAN	1
_AES(ph)PEEVACR_	2 Phospho (STY)	sp|Q7Z6Z7|HUWE1_HUMAN	1		_AFQLEEGEET(ph)EPDCK_	Oxidation (M),Phospho (STY)	sp|P38432|COIL_HUMAN	1		_AES(ph)PESSAIESTQSTPQK_	Phospho (STY)	sp|Q9NTI5|PDS5B_HUMAN	1		_AFAAVPTSHPPEDAPAQPPTPGPAAS(ph)PEQLSFR_	Phospho (STY)	sp|Q14160|SCRIB_HUMAN	0.935		_AESSSGGGTVPSSAGILEQGPSPGDGS(ph)PPKPK_	Phospho (STY)	sp|Q68EM7|RHG17_HUMAN	1		_AGPTLTDENGDDLGLPPS(ph)PGDTSYYQDQVDDFHEAR_	Phospho (STY)	sp|Q9NQZ2|SAS10_HUMAN	0.94		_AQLGINEDHS(ph)EGDEK_	Phospho (STY)	sp|Q69YQ0|CYTSA_HUMAN	1		_AQS(ph)TDS(ph)LGTSGSLQSK_	2 Phospho (STY)	sp|Q15276|RABE1_HUMAN	0.967		_ASALLFSS(ph)DEEDQWNIPASQTHLASDSR_	Phospho (STY)	sp|Q641Q2|FA21A_HUMAN	0.818		_DKM(ox)EGS(ph)DFESSGGR_	Oxidation (M),Phospho (STY)	sp|Q8WYH8|ING5_HUMAN	0.999
_AES(ph)PESSAIESTQST(ph)PQK_	2 Phospho (STY)	sp|Q9NTI5|PDS5B_HUMAN	0.979		_AFVEDS(ph)EDEDGAGEGGSSLLQK_	Phospho (STY)	sp|Q8N9T8|KRI1_HUMAN	1		_AES(ph)PSPAPPPGLR_	Phospho (STY)	sp|Q9BUA3|CK084_HUMAN	1		_AFGPGLQGGSAGS(ph)PAR_	Phospho (STY)	sp|P21333|FLNA_HUMAN	0.999		_AET(ph)PSANHSESDSLSQHNDFLSDK_	Phospho (STY)	sp|Q9ULM3|YETS2_HUMAN	0.975		_AGS(ph)STPGDAPPAVAEVQGR_	Phospho (STY)	sp|Q7Z6Z7|HUWE1_HUMAN	0.943		_AQQQEEQGS(ph)VNDVKEEEK_	Phospho (STY)	sp|Q9Y4W2|LAS1L_HUMAN	1		_AQT(ph)PPGPSLSGSKS(ph)PCPQEK_	2 Phospho (STY)	sp|Q9UQ35|SRRM2_HUMAN	1		_ASAVSELS(ph)PR_	Phospho (STY)	sp|Q9Y2W1|TR150_HUMAN	1		_DKS(ph)PVREPIDNLTPEER_	Phospho (STY)	sp|Q14498|RBM39_HUMAN	1
_AES(ph)PESSAIESTQSTPQK_	2 Phospho (STY)	sp|Q9NTI5|PDS5B_HUMAN	0.999		_AGAAAGDS(ph)DEESRADDK_	Phospho (STY)	sp|O95365|ZBT7A_HUMAN	1		_AES(ph)PTPGM(ox)AQGM(ox)EPGAGQEGAM(ox)FVHAR_	3 Oxidation (M),Phospho (STY)	sp|Q86VX9|MON1A_HUMAN	0.921		_AFGSGIDIKPGT(ph)PPIAGR_	Phospho (STY)	sp|Q9Y520|PRC2C_HUMAN	1		_AET(ph)PTESVSEPEVATK_	Phospho (STY)	sp|P18858|DNLI1_HUMAN	1		_AGSSAAGASGWTSAGSLNSVPTNSAQQGHNS(ph)PDSPVTSAAK_	Phospho (STY)	sp|Q86XP3|DDX42_HUMAN	0.888		_AQQQEEQGS(ph)VNDVKEEEKEEK_	Phospho (STY)	sp|Q9Y4W2|LAS1L_HUMAN	1		_ARS(ph)RT(ph)PPSAPSQSR_	2 Phospho (STY)	sp|Q9UQ35|SRRM2_HUMAN	1		_ASLVALPEQTAS(ph)EEETPPPLLTK_	Phospho (STY)	sp|Q9UKV3|ACINU_HUMAN	0.981		_DLDEEGS(ph)EK_	Phospho (STY)	sp|O43719|HTSF1_HUMAN	1
_AES(ph)PSPAPPPGLR_	Phospho (STY)	sp|Q9BUA3|CK084_HUMAN	1		_AGAEDDEEKGEGT(ph)PREEGK_	Phospho (STY)	sp|Q86VM9|ZCH18_HUMAN	1		_AES(ph)PVKEEAVAEVVTITK_	Phospho (STY)	sp|P07197|NFM_HUMAN	1		_AFLAELEQNS(ph)PK_	Phospho (STY)	sp|Q9UPN3|MACF1_HUMAN	1		_AEVPGATGGDS(ph)PHLQPAEPPGEPR_	Phospho (STY)	sp|Q9P2K5|MYEF2_HUMAN	0.999		_AGSSAAGASGWTSAGSLNSVPTNSAQQGHNSPDS(ph)PVTSAAK_	Phospho (STY)	sp|Q86XP3|DDX42_HUMAN	0.812		_AQS(ph)TDSLGTSGSLQSK_	Phospho (STY)	sp|Q15276|RABE1_HUMAN	0.926		_ARS(ph)VS(ph)PPPK_	2 Phospho (STY)	sp|Q13247|SRSF6_HUMAN	1		_ASPFSVESLLSDS(ph)PPR_	Phospho (STY)	sp|A6NJT0|UNC4_HUMAN	0.86		_DLDRPESQS(ph)PK_	Phospho (STY)	sp|Q8WUA4|TF3C2_HUMAN	0.934
_AES(ph)PTPGM(ox)AQGM(ox)EPGAGQEGAM(ox)FVHAR_	Phospho (STY)	sp|Q86VX9|MON1A_HUMAN	0.955		_AGAGM(ox)ITQHSSNAS(ph)PINR_	2 Phospho (STY)	sp|Q9NWH9|SLTM_HUMAN	1		_AESSSGGGTVPSSAGILEQGPSPGDGS(ph)PPKPK_	Phospho (STY)	sp|Q68EM7|RHG17_HUMAN	1		_AFS(ph)DPFVEAEK_	Phospho (STY)	sp|P34932|HSP74_HUMAN	1		_AFGPGLQGGSAGS(ph)PAR_	Phospho (STY)	sp|P21333|FLNA_HUMAN	1		_AHFNAMFQPSS(ph)PTR_	Phospho (STY)	sp|Q8WUA4|TF3C2_HUMAN	0.876		_AQT(ph)PPGPSLSGSK_	Phospho (STY)	sp|Q9UQ35|SRRM2_HUMAN	1		_ARST(ph)PS(ph)PVLQPR_	2 Phospho (STY)	sp|Q8TEK3|DOT1L_HUMAN	0.861		_ASS(ph)LEDLVLK_	Phospho (STY)	sp|Q15477|SKIV2_HUMAN	0.949		_DLEPGEVPSDS(ph)DEDGEHK_	Phospho (STY)	sp|Q96T58|MINT_HUMAN	0.827
_AES(ph)PVKEEAVAEVVTITK_	Phospho (STY)	sp|P07197|NFM_HUMAN	1		_AGAGMITQHSSNAS(ph)PINR_	Phospho (STY)	sp|Q9NWH9|SLTM_HUMAN	1		_AET(ph)PSANHSESDSLSQHNDFLSDK_	Phospho (STY)	sp|Q9ULM3|YETS2_HUMAN	0.959		_AFVEDS(ph)EDEDGAGEGGSSLLQK_	Phospho (STY)	sp|Q8N9T8|KRI1_HUMAN	1		_AFQLEEGEET(ph)EPDCK_	Phospho (STY)	sp|P38432|COIL_HUMAN	1		_AHLS(ph)ENELEALEK_	Phospho (STY)	sp|P98175|RBM10_HUMAN	1		_AQT(ph)PPGPSLSGSKS(ph)PCPQEK_	2 Phospho (STY)	sp|Q9UQ35|SRRM2_HUMAN	0.998		_AS(ph)PEPQRENAS(ph)PAPGTTAEEAM(ox)SR_	Oxidation (M),2 Phospho (STY)	sp|P46379|BAG6_HUMAN	1		_ATAPQTQHVS(ph)PM(ox)R_	Oxidation (M),Phospho (STY)	sp|P29692|EF1D_HUMAN	0.992		_DLESCS(ph)DDDNQGSK_	Phospho (STY)	sp|Q5T3I0|GPTC4_HUMAN	1
_AESSSGGGTVPSSAGILEQGPSPGDGS(ph)PPKPK_	Phospho (STY)	sp|Q68EM7|RHG17_HUMAN	0.999		_AGDLLEDS(ph)PK_	Phospho (STY)	sp|P51858|HDGF_HUMAN	1		_AET(ph)PTESVSEPEVATK_	Phospho (STY)	sp|P18858|DNLI1_HUMAN	1		_AGAEDDEEKGEGT(ph)PREEGK_	Phospho (STY)	sp|Q86VM9|ZCH18_HUMAN	1		_AFVEDS(ph)EDEDGAGEGGSSLLQK_	Phospho (STY)	sp|Q8N9T8|KRI1_HUMAN	1		_AHPPVTSAPLS(ph)PPQPNDLYK_	Phospho (STY)	sp|Q4VCS5|AMOT_HUMAN	1		_ARGDS(ph)EALDEES_	Phospho (STY)	sp|Q7Z4V5|HDGR2_HUMAN	1		_AS(ph)PS(ph)PQPSSQPLQIHR_	2 Phospho (STY)	sp|Q9HC35|EMAL4_HUMAN	0.998		_ATAPQTQHVS(ph)PMR_	Phospho (STY)	sp|P29692|EF1D_HUMAN	1		_DLFDYS(ph)PPLHK_	Phospho (STY)	sp|Q9NYF8|BCLF1_HUMAN	1
_AET(ph)EEAEEPEEDGEEHVCVSASK_	Phospho (STY)	sp|P46821|MAP1B_HUMAN	1		_AGDLLEDS(ph)PKRPK_	Phospho (STY)	sp|P51858|HDGF_HUMAN	1		_AEVPGATGGDS(ph)PHLQPAEPPGEPR_	Phospho (STY)	sp|Q9P2K5|MYEF2_HUMAN	1		_AGAGMITQHSSNAS(ph)PINR_	Phospho (STY)	sp|Q9NWH9|SLTM_HUMAN	1		_AGAAAGDS(ph)DEESRADDK_	Phospho (STY)	sp|O95365|ZBT7A_HUMAN	1		_AIGGIILTAS(ph)HNPGGPNGDFGIK_	Phospho (STY)	sp|P36871|PGM1_HUMAN	0.813		_ARHDS(ph)PDLAPNVTYSLPR_	Phospho (STY)	sp|Q9BRD0|BUD13_HUMAN	1		_ASAPERT(ph)PS(ph)PAPK_	2 Phospho (STY)	sp|Q63ZY6|NSN5C_HUMAN	1		_ATDIPASAS(ph)PPPVAGVPFFK_	Phospho (STY)	sp|Q8N1G0|ZN687_HUMAN	1		_DLPAQRGEES(ph)S(ph)EEEEK_	2 Phospho (STY)	sp|Q9BW71|HIRP3_HUMAN	1
_AET(ph)PSANHSESDSLSQHNDFLSDK_	Oxidation (M),Phospho (STY)	sp|Q9ULM3|YETS2_HUMAN	0.951		_AGDPGEM(ox)PQS(ph)PTGLGQPK_	Phospho (STY)	sp|Q9UIF9|BAZ2A_HUMAN	0.978		_AFAAVPTSHPPEDAPAQPPTPGPAAS(ph)PEQLSFR_	Phospho (STY)	sp|Q14160|SCRIB_HUMAN	0.893		_AGAPGALS(ph)PSYDGGLHGLQSK_	Phospho (STY)	sp|P15923|TFE2_HUMAN	0.972		_AGAEDDEEKGEGT(ph)PREEGK_	Phospho (STY)	sp|Q86VM9|ZCH18_HUMAN	1		_AIGSTSKPQES(ph)PK_	Phospho (STY)	sp|P18887|XRCC1_HUMAN	1		_ARQEEGADAS(ph)EEDPTPAGEEDVK_	Phospho (STY)	sp|Q86X53|ERIC1_HUMAN	1		_ASAPQS(ph)DEGS(ph)DIDSEPDLPLK_	2 Phospho (STY)	sp|P23760|PAX3_HUMAN	0.889		_ATENDIYNFFS(ph)PLNPVR_	Phospho (STY)	sp|P31943|HNRH1_HUMAN	1		_DLS(ph)TSPKPS(ph)PIPS(ph)PVLGR_	3 Phospho (STY)	sp|Q8NDI1|EHBP1_HUMAN	0.805
_AET(ph)PTESVSEPEVATK_	Phospho (STY)	sp|P18858|DNLI1_HUMAN	1		_AGDTS(ph)DQEGHSLEEK_	Phospho (STY)	sp|Q99607|ELF4_HUMAN	0.997		_AFGPGLQGGSAGS(ph)PAR_	Phospho (STY)	sp|P21333|FLNA_HUMAN	1		_AGDLLEDS(ph)PK_	Phospho (STY)	sp|P51858|HDGF_HUMAN	1		_AGAGMITQHSSNAS(ph)PINR_	Phospho (STY)	sp|Q9NWH9|SLTM_HUMAN	0.974		_AIIS(ph)PR_	Phospho (STY)	sp|Q9UQ35|SRRM2_HUMAN	1		_ARRLAES(ph)S(ph)K_	2 Phospho (STY)	sp|Q9UPT8|ZC3H4_HUMAN	1		_ASAVSELS(ph)PR_	Phospho (STY)	sp|Q9Y2W1|TR150_HUMAN	1		_ATGGLCLLGAYADS(ph)DDDDNDVSEK_	Phospho (STY)	sp|Q8N3X1|FNBP4_HUMAN	1		_DLTSLRNVS(ph)CEVDMFK_	Phospho (STY)	sp|Q8TCS8|PNPT1_HUMAN	0.991
_AEVPGATGGDS(ph)PHLQPAEPPGEPR_	Phospho (STY)	sp|Q9P2K5|MYEF2_HUMAN	1		_AGEPDGES(ph)LDEQPSSSSSK_	Phospho (STY)	sp|Q9H3Q1|BORG4_HUMAN	1		_AFLAELEQNS(ph)PK_	Phospho (STY)	sp|Q9UPN3|MACF1_HUMAN	1		_AGDLLEDS(ph)PKRPK_	Phospho (STY)	sp|P51858|HDGF_HUMAN	1		_AGAPVGGS(ph)PGLAK_	Phospho (STY)	sp|Q6ZRS2|SRCAP_HUMAN	1		_AILGSYDSELTPAEYS(ph)PQLTR_	Phospho (STY)	sp|Q9Y6D9|MD1L1_HUMAN	1		_ARS(ph)RT(ph)PPSAPSQSR_	2 Phospho (STY)	sp|Q9UQ35|SRRM2_HUMAN	0.998		_ASSHS(ph)S(ph)QTQGGGSVTK_	2 Phospho (STY)	sp|P02545|LMNA_HUMAN	0.824		_ATIS(ph)DEEIER_	Phospho (STY)	sp|Q9UQN3|CHM2B_HUMAN	1		_DLVQPDKPAS(ph)PK_	Phospho (STY)	sp|Q6PJT7|ZC3HE_HUMAN	1
_AFAAVPTSHPPEDAPAQPPTPGPAAS(ph)PEQLSFR_	Phospho (STY)	sp|Q14160|SCRIB_HUMAN	0.984		_AGEPNS(ph)PDAEEANSPDVTAGCDPAGVHPPR_	Phospho (STY)	sp|Q08J23|NSUN2_HUMAN	1		_AFVEDS(ph)EDEDGAGEGGSSLLQK_	Phospho (STY)	sp|Q8N9T8|KRI1_HUMAN	1		_AGDPGEMPQS(ph)PTGLGQPK_	Phospho (STY)	sp|Q9UIF9|BAZ2A_HUMAN	0.98		_AGDLLEDS(ph)PK_	Phospho (STY)	sp|P51858|HDGF_HUMAN	1		_AITSLLGGGS(ph)PK_	Phospho (STY)	sp|Q6KC79|NIPBL_HUMAN	1		_ARS(ph)VS(ph)PPPK_	2 Phospho (STY)	sp|Q13247|SRSF6_HUMAN	1		_ASSPS(ph)PLTIGTPES(ph)QR_	2 Phospho (STY)	sp|Q9NPI6|DCP1A_HUMAN	0.833		_ATNES(ph)EDEIPQLVPIGK_	Phospho (STY)	sp|O76021|RL1D1_HUMAN	0.998		_DM(ox)DEPS(ph)PVPNVEEVTLPK_	Oxidation (M),Phospho (STY)	sp|Q8TAQ2|SMRC2_HUMAN	1
_AFGPGLQGGSAGS(ph)PAR_	Phospho (STY)	sp|P21333|FLNA_HUMAN	1		_AGEPNSPDAEEANS(ph)PDVTAGCDPAGVHPPR_	Phospho (STY)	sp|Q08J23|NSUN2_HUMAN	1		_AGAAAGDS(ph)DEESRADDK_	Phospho (STY)	sp|O95365|ZBT7A_HUMAN	1		_AGDTS(ph)DQEGHSLEEK_	Phospho (STY)	sp|Q99607|ELF4_HUMAN	0.989		_AGDLLEDS(ph)PKRPK_	Phospho (STY)	sp|P51858|HDGF_HUMAN	1		_AKPAMPQDS(ph)VPSPR_	Phospho (STY)	sp|P53396|ACLY_HUMAN	0.818		_AS(ph)DLEDEESAAR_	Phospho (STY)	sp|Q86VM9|ZCH18_HUMAN	1		_ASVS(ph)GPNS(ph)PSETRR_	2 Phospho (STY)	sp|O15344|TRI18_HUMAN	0.902		_ATVTPS(ph)PVK_	Phospho (STY)	sp|Q9H1E3|NUCKS_HUMAN	0.991		_DNQESS(ph)DAELS(ph)SSEYIK_	2 Phospho (STY)	sp|Q96JM3|CHAP1_HUMAN	0.986
_AFGSGIDIKPGT(ph)PPIAGR_	Phospho (STY)	sp|Q9Y520|PRC2C_HUMAN	1		_AGET(ph)RFTDTR_	Phospho (STY)	sp|P13639|EF2_HUMAN	0.984		_AGAEDDEEKGEGT(ph)PREEGK_	Phospho (STY)	sp|Q86VM9|ZCH18_HUMAN	1		_AGEPDGES(ph)LDEQPSSSSSK_	Phospho (STY)	sp|Q9H3Q1|BORG4_HUMAN	1		_AGDPGEM(ox)PQS(ph)PTGLGQPK_	Oxidation (M),Phospho (STY)	sp|Q9UIF9|BAZ2A_HUMAN	0.988		_AKPAMPQDSVPS(ph)PR_	Phospho (STY)	sp|P53396|ACLY_HUMAN	0.999		_AS(ph)PEPQRENASPAPGTTAEEAM(ox)SR_	Oxidation (M),Phospho (STY)	sp|P46379|BAG6_HUMAN	0.994		_ATAPQT(ph)QHVSPM(ox)R_	Oxidation (M),Phospho (STY)	sp|P29692|EF1D_HUMAN	0.946		_AVMLLHT(ph)HTIT(ph)SR_	2 Phospho (STY)	sp|Q92616|GCN1L_HUMAN	0.808		_DQDLASCDRDRSS(ph)R_	Phospho (STY)	sp|Q9Y383|LC7L2_HUMAN	0.844
_AFLAELEQNS(ph)PK_	Phospho (STY)	sp|Q9UPN3|MACF1_HUMAN	1		_AGETRFT(ph)DTR_	Phospho (STY)	sp|P13639|EF2_HUMAN	0.98		_AGAGM(ox)ITQHSSNAS(ph)PINR_	Oxidation (M),Phospho (STY)	sp|Q9NWH9|SLTM_HUMAN	0.996		_AGEPNS(ph)PDAEEANSPDVTAGCDPAGVHPPR_	Phospho (STY)	sp|Q08J23|NSUN2_HUMAN	0.999		_AGDPGEM(ox)PQSPT(ph)GLGQPK_	Oxidation (M),Phospho (STY)	sp|Q9UIF9|BAZ2A_HUMAN	0.856		_AKPPADPAAAAS(ph)PCR_	Phospho (STY)	sp|Q9GZT9|EGLN1_HUMAN	1		_AS(ph)PPGDLQNPK_	Phospho (STY)	sp|O00273|DFFA_HUMAN	1		_ATAPQTQHVS(ph)PM(ox)R_	Oxidation (M),Phospho (STY)	sp|P29692|EF1D_HUMAN	0.999		_AVPMAPAPAS(ph)PGSSNDSSAR_	Phospho (STY)	sp|Q66K74|MAP1S_HUMAN	0.844		_DQQPS(ph)GS(ph)EGEDDDAEAALKK_	2 Phospho (STY)	sp|Q9NXG2|THUM1_HUMAN	1
_AFQLEEGEET(ph)EPDCK_	Phospho (STY)	sp|P38432|COIL_HUMAN	1		_AGGAS(ph)PAASSTAQPPTQHR_	Phospho (STY)	sp|Q8IU81|I2BP1_HUMAN	1		_AGAGMITQHSSNAS(ph)PINR_	Phospho (STY)	sp|Q9NWH9|SLTM_HUMAN	0.987		_AGEPNSPDAEEANS(ph)PDVTAGCDPAGVHPPR_	2 Phospho (STY)	sp|Q08J23|NSUN2_HUMAN	1		_AGDTS(ph)DQEGHSLEEK_	Phospho (STY)	sp|Q99607|ELF4_HUMAN	0.992		_AKS(ph)PQPPVEEEDEHFDDTVVCLDTYNCDLHFK_	Phospho (STY)	sp|Q00839|HNRPU_HUMAN	1		_AS(ph)T(ph)KLT(ph)PIGYIPK_	3 Phospho (STY)	sp|P35558|PCKGC_HUMAN	0.999		_ATGDGS(ph)S(ph)PELPSLER_	2 Phospho (STY)	sp|Q9H2Y7|ZN106_HUMAN	1		_AVQQHQHGYDS(ph)DEEVDSELGTWEHQLR_	Phospho (STY)	sp|Q8IWZ8|SUGP1_HUMAN	0.995		_DQS(ph)PFSK_	Phospho (STY)	sp|Q13427|PPIG_HUMAN	0.993
_AFRQS(ph)VHLAHHQR_	Phospho (STY)	sp|Q6ECI4|ZN470_HUMAN	1		_AGGGGGLGAGS(ph)PALSGGQGR_	Phospho (STY)	sp|Q6IQ22|RAB12_HUMAN	0.999		_AGDLLEDS(ph)PK_	Phospho (STY)	sp|P51858|HDGF_HUMAN	1		_AGETRFT(ph)DTR_	Phospho (STY)	sp|P13639|EF2_HUMAN	1		_AGEPDGES(ph)LDEQPSSSSSK_	Phospho (STY)	sp|Q9H3Q1|BORG4_HUMAN	1		_AKS(ph)PVPKS(ph)PVEEAK_	2 Phospho (STY)	sp|P07197|NFM_HUMAN	1		_ASAPS(ph)PNAQVACDHCLK_	Phospho (STY)	sp|Q14258|TRI25_HUMAN	0.987		_ATGGLCLLGAYADS(ph)DDDDNDVSEK_	Phospho (STY)	sp|Q8N3X1|FNBP4_HUMAN	0.999		_AVTIANS(ph)PSKPSEK_	Phospho (STY)	sp|Q8NEF9|SRFB1_HUMAN	0.999		_DRHDT(ph)PDPS(ph)PR_	2 Phospho (STY)	sp|Q9BRD0|BUD13_HUMAN	1
_AFVEDS(ph)EDEDGAGEGGSSLLQK_	Phospho (STY)	sp|Q8N9T8|KRI1_HUMAN	1		_AGGPAT(ph)PLS(ph)PTR_	Phospho (STY)	sp|Q03252|LMNB2_HUMAN	0.986		_AGDLLEDS(ph)PKRPK_	Phospho (STY)	sp|P51858|HDGF_HUMAN	1		_AGGAS(ph)PAASSTAQPPTQHR_	Phospho (STY)	sp|Q8IU81|I2BP1_HUMAN	1		_AGEPNS(ph)PDAEEANSPDVTAGCDPAGVHPPR_	Phospho (STY)	sp|Q08J23|NSUN2_HUMAN	1		_AKS(ph)PVPKS(ph)PVEEK_	2 Phospho (STY)	sp|P07197|NFM_HUMAN	1		_ASASRPQPAPADGADPPPAEEPEARPDGEGS(ph)PGK_	Phospho (STY)	sp|P11274|BCR_HUMAN	1		_ATNES(ph)EDEIPQLVPIGK_	Phospho (STY)	sp|O76021|RL1D1_HUMAN	0.987		_AVVM(ox)DSQY(ph)LIEPCGSGKSR_	Oxidation (M),Phospho (STY)	sp|Q9Y3M8|STA13_HUMAN	0.998		_DRICS(ph)DEEEDEEK_	Phospho (STY)	sp|Q9NPG3|UBN1_HUMAN	1
_AGAEDDEEKGEGT(ph)PREEGK_	Phospho (STY)	sp|Q86VM9|ZCH18_HUMAN	1		_AGGPTT(ph)PLS(ph)PTR_	2 Phospho (STY)	sp|P20700|LMNB1_HUMAN	0.99		_AGDPGEM(ox)PQS(ph)PTGLGQPK_	Oxidation (M),Phospho (STY)	sp|Q9UIF9|BAZ2A_HUMAN	0.916		_AGGGGGLGAGS(ph)PALSGGQGR_	2 Phospho (STY)	sp|Q6IQ22|RAB12_HUMAN	0.998		_AGEPNSPDAEEANS(ph)PDVTAGCDPAGVHPPR_	Phospho (STY)	sp|Q08J23|NSUN2_HUMAN	1		_AKSPQPPVEEEDEHFDDT(ph)VVCLDTYNCDLHFK_	Phospho (STY)	sp|Q00839|HNRPU_HUMAN	0.858		_ASAVSELS(ph)PR_	Phospho (STY)	sp|Q9Y2W1|TR150_HUMAN	1		_ATVT(ph)PS(ph)PVK_	2 Phospho (STY)	sp|Q9H1E3|NUCKS_HUMAN	1		_AY(ph)WLLEEMLTK_	Phospho (STY)	sp|O95429|BAG4_HUMAN	1		_DRS(ph)PHRS(ph)SPSDTRPK_	2 Phospho (STY)	sp|Q8IWS0|PHF6_HUMAN	0.818
_AGAGM(ox)ITQHSSNAS(ph)PINR_	Phospho (STY)	sp|Q9NWH9|SLTM_HUMAN	1		_AGGSAALS(ph)PSK_	Phospho (STY)	sp|Q92522|H1X_HUMAN	0.999		_AGDT(ph)SDQEGHSLEEK_	Phospho (STY)	sp|Q99607|ELF4_HUMAN	0.841		_AGGPAT(ph)PLS(ph)PTR_	Phospho (STY)	sp|Q03252|LMNB2_HUMAN	0.97		_AGGAS(ph)PAASSTAQPPTQHR_	Phospho (STY)	sp|Q8IU81|I2BP1_HUMAN	1		_ALAEEAS(ph)EEELPS(ph)DVDLNDPYFAEEVK_	2 Phospho (STY)	sp|Q9H501|ESF1_HUMAN	1		_ASLLHSM(ox)PT(ph)HSSPR_	Oxidation (M),Phospho (STY)	sp|O75122|CLAP2_HUMAN	0.859		_ATVTPS(ph)PVK_	Phospho (STY)	sp|Q9H1E3|NUCKS_HUMAN	0.944		_CGSGPVHISGQHLVAVEEDAES(ph)EDEEEEDVK_	Phospho (STY)	sp|P06748|NPM_HUMAN	1		_DRS(ph)PPKS(ph)PEK_	2 Phospho (STY)	sp|Q9UQ35|SRRM2_HUMAN	1
_AGAGMITQHSSNAS(ph)PINR_	Phospho (STY)	sp|Q9NWH9|SLTM_HUMAN	0.978		_AGLAS(ph)PEEEDAVGKEPLK_	Phospho (STY)	sp|Q9UNS1|TIM_HUMAN	1		_AGDTS(ph)DQEGHSLEEK_	Phospho (STY)	sp|Q99607|ELF4_HUMAN	0.997		_AGGPTT(ph)PLS(ph)PTR_	Phospho (STY)	sp|P20700|LMNB1_HUMAN	0.971		_AGGGGGLGAGS(ph)PALSGGQGR_	Phospho (STY)	sp|Q6IQ22|RAB12_HUMAN	0.997		_ALAEEAS(ph)EEELPSDVDLNDPYFAEEVK_	Phospho (STY)	sp|Q9H501|ESF1_HUMAN	1		_ASM(ox)SEFLES(ph)EDGEVEQQR_	Oxidation (M),Phospho (STY)	sp|Q15022|SUZ12_HUMAN	1		_AVEES(ph)S(ph)DEERQR_	2 Phospho (STY)	sp|Q9BW71|HIRP3_HUMAN	1		_CRS(ph)PGMLEPLGSSR_	Phospho (STY)	sp|Q9UQ35|SRRM2_HUMAN	1		_DS(ph)RSLSY(ph)S(ph)PVER_	3 Phospho (STY)	sp|Q9UQ35|SRRM2_HUMAN	0.922
_AGAPGALS(ph)PSYDGGLHGLQSK_	Phospho (STY)	sp|P15923|TFE2_HUMAN	0.892		_AGLES(ph)GAEPGDGDS(ph)DTTK_	Phospho (STY)	sp|O60832|DKC1_HUMAN	0.999		_AGEPDGES(ph)LDEQPSSSSSK_	Phospho (STY)	sp|Q9H3Q1|BORG4_HUMAN	1		_AGGPTTPLS(ph)PTR_	Phospho (STY)	sp|P20700|LMNB1_HUMAN	0.94		_AGGPAT(ph)PLS(ph)PTR_	2 Phospho (STY)	sp|Q03252|LMNB2_HUMAN	0.994		_ALDIDS(ph)DEESEPK_	Phospho (STY)	sp|Q96DR7|ARHGQ_HUMAN	0.836		_ASPS(ph)PQPSSQPLQIHR_	Phospho (STY)	sp|Q9HC35|EMAL4_HUMAN	0.961		_AVEQEDELS(ph)DVS(ph)QGGSK_	2 Phospho (STY)	sp|O60271|JIP4_HUMAN	0.999		_DAASKPSGEGSFSKPGDGGS(ph)PSKPSDHEPPK_	Phospho (STY)	sp|O14654|IRS4_HUMAN	0.875		_DSAIPVES(ph)DT(ph)DDEGAPR_	2 Phospho (STY)	sp|Q96D46|NMD3_HUMAN	1
_AGDLLEDS(ph)PK_	Phospho (STY)	sp|P51858|HDGF_HUMAN	1		_AGLES(ph)GAEPGDGDS(ph)DTTKK_	2 Phospho (STY)	sp|O60832|DKC1_HUMAN	0.995		_AGEPNS(ph)PDAEEANSPDVTAGCDPAGVHPPR_	Phospho (STY)	sp|Q08J23|NSUN2_HUMAN	1		_AGGSAALS(ph)PSK_	Phospho (STY)	sp|Q92522|H1X_HUMAN	0.987		_AGGPTT(ph)PLS(ph)PTR_	2 Phospho (STY)	sp|P20700|LMNB1_HUMAN	0.997		_ALEAASLSQHPPSLCIS(ph)DS(ph)EEEEEERK_	2 Phospho (STY)	sp|O43159|RRP8_HUMAN	0.99		_ASS(ph)HSSQTQGGGSVTK_	Phospho (STY)	sp|P02545|LMNA_HUMAN	0.887		_AVMLLHT(ph)HTIT(ph)SR_	2 Phospho (STY)	sp|Q92616|GCN1L_HUMAN	0.868		_DAEYIYPSLES(ph)DDDDPALK_	Phospho (STY)	sp|Q9UPP1|PHF8_HUMAN	0.996		_DSAIPVES(ph)DTDDEGAPR_	Phospho (STY)	sp|Q96D46|NMD3_HUMAN	0.846
_AGDLLEDS(ph)PKRPK_	Phospho (STY)	sp|P51858|HDGF_HUMAN	1		_AGLESGAEPGDGDS(ph)DTTK_	Phospho (STY)	sp|O60832|DKC1_HUMAN	0.998		_AGEPNSPDAEEANS(ph)PDVTAGCDPAGVHPPR_	Phospho (STY)	sp|Q08J23|NSUN2_HUMAN	1		_AGGSAALS(ph)PSKK_	2 Phospho (STY)	sp|Q92522|H1X_HUMAN	0.993		_AGGSAALS(ph)PSK_	Phospho (STY)	sp|Q92522|H1X_HUMAN	0.999		_ALEEGDGSVSGSS(ph)PR_	Phospho (STY)	sp|Q8N3X1|FNBP4_HUMAN	0.996		_ASS(ph)LEDLVLK_	Phospho (STY)	sp|Q15477|SKIV2_HUMAN	0.986		_AYS(ph)PT(ph)CSPTLGFK_	2 Phospho (STY)	sp|Q5TGY3|AHDC1_HUMAN	0.803		_DAPTS(ph)PASVASSSSTPSSK_	Phospho (STY)	sp|Q04726|TLE3_HUMAN	0.997		_DSDQVAQS(ph)DGEES(ph)PAAEEQLLGEHIK_	2 Phospho (STY)	sp|O94979|SC31A_HUMAN	0.999
_AGDPGEM(ox)PQS(ph)PTGLGQPK_	Phospho (STY)	sp|Q9UIF9|BAZ2A_HUMAN	0.904		_AGLESGAEPGDGDS(ph)DTTKK_	Phospho (STY)	sp|O60832|DKC1_HUMAN	0.998		_AGGAS(ph)PAASSTAQPPTQHR_	Phospho (STY)	sp|Q8IU81|I2BP1_HUMAN	1		_AGGSAALSPS(ph)K_	2 Phospho (STY)	sp|Q92522|H1X_HUMAN	0.981		_AGLES(ph)GAEPGDGDS(ph)DTTK_	2 Phospho (STY)	sp|O60832|DKC1_HUMAN	1		_ALES(ph)PERPFLAILGGAK_	Phospho (STY)	sp|P00558|PGK1_HUMAN	1		_ASS(ph)PSPLTIGTPESQR_	Phospho (STY)	sp|Q9NPI6|DCP1A_HUMAN	0.863		_CAM(ox)NSLPDIEEVKDKS(ph)IK_	Oxidation (M),Phospho (STY)	sp|P14316|IRF2_HUMAN	1		_DAQRLS(ph)PIPEEVPK_	Phospho (STY)	sp|Q96T23|RSF1_HUMAN	1		_DSENLAS(ph)PSEYPENGER_	Phospho (STY)	sp|P52948|NUP98_HUMAN	0.972
_AGDPGEM(ox)PQSPT(ph)GLGQPK_	Phospho (STY)	sp|Q9UIF9|BAZ2A_HUMAN	0.838		_AGLGS(ph)PERPPK_	Phospho (STY)	sp|Q9H6F5|CCD86_HUMAN	1		_AGGGGGLGAGS(ph)PALSGGQGR_	Phospho (STY)	sp|Q6IQ22|RAB12_HUMAN	1		_AGLAS(ph)PEEEDAVGKEPLK_	Phospho (STY)	sp|Q9UNS1|TIM_HUMAN	1		_AGLES(ph)GAEPGDGDS(ph)DTTKK_	2 Phospho (STY)	sp|O60832|DKC1_HUMAN	0.999		_ALPNNTSSS(ph)PQPK_	Phospho (STY)	sp|P04637|P53_HUMAN	0.98		_ASSLSES(ph)SPPK_	Phospho (STY)	sp|Q9UHB6|LIMA1_HUMAN	0.81		_CDGDAS(ph)PPS(ph)PAR_	2 Phospho (STY)	sp|Q14493|SLBP_HUMAN	1		_DAS(ph)PINRWS(ph)PTR_	2 Phospho (STY)	sp|Q13523|PRP4B_HUMAN	1		_DSLIT(ph)PHVS(ph)R_	2 Phospho (STY)	sp|P49792|RBP2_HUMAN	1
_AGDTS(ph)DQEGHSLEEK_	Phospho (STY)	sp|Q99607|ELF4_HUMAN	1		_AGLGS(ph)PERPPKT(ph)S(ph)PGSPR_	2 Phospho (STY)	sp|Q9H6F5|CCD86_HUMAN	0.978		_AGGPAT(ph)PLS(ph)PTR_	2 Phospho (STY)	sp|Q03252|LMNB2_HUMAN	0.981		_AGLES(ph)GAEPGDGDS(ph)DTTK_	Phospho (STY)	sp|O60832|DKC1_HUMAN	1		_AGLES(ph)GAEPGDGDSDTTK_	Phospho (STY)	sp|O60832|DKC1_HUMAN	1		_ALPSLNTGSSS(ph)PR_	Phospho (STY)	sp|O14545|TRAD1_HUMAN	0.998		_ASSVS(ph)TKESPARK_	Phospho (STY)	sp|Q13428|TCOF_HUMAN	0.822		_CGSGPVHISGQHLVAVEEDAES(ph)EDEEEEDVK_	Phospho (STY)	sp|P06748|NPM_HUMAN	1		_DDEEKPKIEDVGS(ph)DEEDDSGK_	Phospho (STY)	sp|P08238|HS90B_HUMAN	0.998		_DSLITPHVSRSS(ph)T(ph)PRES(ph)PCGK_	3 Phospho (STY)	sp|P49792|RBP2_HUMAN	0.824
_AGEPDGES(ph)LDEQPSSSSSK_	Phospho (STY)	sp|Q9H3Q1|BORG4_HUMAN	1		_AGLGS(ph)PERPPKT(ph)SPGS(ph)PR_	Phospho (STY)	sp|Q9H6F5|CCD86_HUMAN	0.93		_AGGPATPLS(ph)PTR_	Phospho (STY)	sp|Q03252|LMNB2_HUMAN	0.916		_AGLES(ph)GAEPGDGDS(ph)DTTKK_	Phospho (STY)	sp|O60832|DKC1_HUMAN	0.992		_AGLESGAEPGDGDS(ph)DTTK_	Phospho (STY)	sp|O60832|DKC1_HUMAN	0.999		_ALQS(ph)PK_	Phospho (STY)	sp|P78347|GTF2I_HUMAN	1		_ASSVSTKES(ph)PAR_	Phospho (STY)	sp|Q13428|TCOF_HUMAN	0.987		_CQM(ox)MFT(ph)DEDAAVNHQK_	Oxidation (M),Phospho (STY)	sp|Q86UP3|ZFHX4_HUMAN	1		_DDPDGKQEAKPQQAAGMLS(ph)PK_	Phospho (STY)	sp|Q13428|TCOF_HUMAN	1		_DSQDASAEQS(ph)DHDDEVASLASASGGFGTK_	Phospho (STY)	sp|Q6P2E9|EDC4_HUMAN	0.861
_AGEPNS(ph)PDAEEANSPDVTAGCDPAGVHPPR_	2 Phospho (STY)	sp|Q08J23|NSUN2_HUMAN	1		_AGLGS(ph)PERPPKTS(ph)PGS(ph)PR_	Phospho (STY)	sp|Q9H6F5|CCD86_HUMAN	0.916		_AGGPTT(ph)PLS(ph)PTR_	2 Phospho (STY)	sp|P20700|LMNB1_HUMAN	0.998		_AGLES(ph)GAEPGDGDSDTTK_	Phospho (STY)	sp|O60832|DKC1_HUMAN	1		_AGLESGAEPGDGDS(ph)DTTKK_	Phospho (STY)	sp|O60832|DKC1_HUMAN	0.971		_ALS(ph)PGRES(ph)PK_	2 Phospho (STY)	sp|Q13207|TBX2_HUMAN	1		_ASSVSTKES(ph)PARK_	Phospho (STY)	sp|Q13428|TCOF_HUMAN	1		_DAEYIYPSLES(ph)DDDDPALK_	Phospho (STY)	sp|Q9UPP1|PHF8_HUMAN	0.999		_DEILPTT(ph)PISEQK_	Phospho (STY)	sp|P23396|RS3_HUMAN	0.999		_DSRS(ph)LSY(ph)S(ph)PVER_	3 Phospho (STY)	sp|Q9UQ35|SRRM2_HUMAN	0.819
_AGEPNSPDAEEANS(ph)PDVTAGCDPAGVHPPR_	Phospho (STY)	sp|Q08J23|NSUN2_HUMAN	1		_AGLGSPERPPKTS(ph)PGS(ph)PR_	Phospho (STY)	sp|Q9H6F5|CCD86_HUMAN	0.834		_AGGPTT(ph)PLSPTR_	Phospho (STY)	sp|P20700|LMNB1_HUMAN	0.981		_AGLESGAEPGDGDS(ph)DTTK_	Phospho (STY)	sp|O60832|DKC1_HUMAN	0.997		_AGLGS(ph)PERPPK_	Phospho (STY)	sp|Q9H6F5|CCD86_HUMAN	1		_ALS(ph)PVIPLIPR_	Phospho (STY)	sp|O14686|KMT2D_HUMAN	1		_ATAPQTQHVS(ph)PM(ox)R_	Oxidation (M),Phospho (STY)	sp|P29692|EF1D_HUMAN	1		_DAPTS(ph)PASVASSSSTPSSK_	Phospho (STY)	sp|Q04726|TLE3_HUMAN	0.946		_DELHIVEAEAM(ox)NYEGS(ph)PIK_	Oxidation (M),Phospho (STY)	sp|P06748|NPM_HUMAN	1		_DTLSNPQS(ph)PQPS(ph)PYNS(ph)PKPQHK_	3 Phospho (STY)	sp|Q96PU5|NED4L_HUMAN	0.84
_AGETRFT(ph)DTR_	Phospho (STY)	sp|P13639|EF2_HUMAN	0.993		_AGLS(ph)PANCQSDR_	Oxidation (M),Phospho (STY)	sp|Q14692|BMS1_HUMAN	1		_AGGPTTPLS(ph)PTR_	Phospho (STY)	sp|P20700|LMNB1_HUMAN	0.983		_AGLESGAEPGDGDS(ph)DTTKK_	Phospho (STY)	sp|O60832|DKC1_HUMAN	0.995		_AGLGS(ph)PERPPKT(ph)SPGS(ph)PR_	3 Phospho (STY)	sp|Q9H6F5|CCD86_HUMAN	0.948		_ALSSGGSITS(ph)PPLSPALPK_	Phospho (STY)	sp|Q6Y7W6|PERQ2_HUMAN	0.969		_ATAPQTQHVS(ph)PMR_	Phospho (STY)	sp|P29692|EF1D_HUMAN	0.992		_DAS(ph)PINRWS(ph)PTR_	2 Phospho (STY)	sp|Q13523|PRP4B_HUMAN	1		_DELHIVEAEAMNYEGS(ph)PIK_	Phospho (STY)	sp|P06748|NPM_HUMAN	1		_DTSPDKGELVS(ph)DEEEDT_	Phospho (STY)	sp|Q9UPU7|TBD2B_HUMAN	1
_AGGAS(ph)PAASSTAQPPTQHR_	Phospho (STY)	sp|Q8IU81|I2BP1_HUMAN	1		_AGM(ox)SSNQS(ph)IS(ph)SPVLDAVPR_	Phospho (STY)	sp|Q9UQ35|SRRM2_HUMAN	0.875		_AGGSAALS(ph)PSK_	Phospho (STY)	sp|Q92522|H1X_HUMAN	1		_AGLGS(ph)PERPPK_	Phospho (STY)	sp|Q9H6F5|CCD86_HUMAN	1		_AGLGS(ph)PERPPKTS(ph)PGS(ph)PR_	3 Phospho (STY)	sp|Q9H6F5|CCD86_HUMAN	0.936		_ALSSLHGDDQDS(ph)EDEVLTIPEVK_	Phospho (STY)	sp|P11717|MPRI_HUMAN	1		_ATIS(ph)DEEIER_	Phospho (STY)	sp|Q9UQN3|CHM2B_HUMAN	0.997		_DCLIEDS(ph)DDEAGQS_	Phospho (STY)	sp|Q2VPK5|CTU2_HUMAN	1		_DFQEYVEPGEDFPAS(ph)PQR_	Phospho (STY)	sp|Q9Y6G9|DC1L1_HUMAN	1		_DVEDM(ox)ELS(ph)DVEDDGSK_	Oxidation (M),Phospho (STY)	sp|Q5VT52|RPRD2_HUMAN	1
_AGGGGGLGAGS(ph)PALSGGQGR_	Phospho (STY)	sp|Q6IQ22|RAB12_HUMAN	1		_AGM(ox)SSNQSISS(ph)PVLDAVPR_	Phospho (STY)	sp|Q9UQ35|SRRM2_HUMAN	0.995		_AGGSAALS(ph)PSKK_	Phospho (STY)	sp|Q92522|H1X_HUMAN	0.904		_AGLGS(ph)PERPPKT(ph)SPGS(ph)PR_	Phospho (STY)	sp|Q9H6F5|CCD86_HUMAN	0.973		_AGLGSPERPPKT(ph)SPGS(ph)PR_	2 Phospho (STY)	sp|Q9H6F5|CCD86_HUMAN	0.944		_ALVEFESNPEETREPGS(ph)PPSVQR_	Phospho (STY)	sp|Q9H6F5|CCD86_HUMAN	0.999		_ATNES(ph)EDEIPQLVPIGK_	Phospho (STY)	sp|O76021|RL1D1_HUMAN	0.999		_DDEEKPKIEDVGS(ph)DEEDDSGK_	Phospho (STY)	sp|P08238|HS90B_HUMAN	1		_DFQEYVEPGEDFPAS(ph)PQRR_	Phospho (STY)	sp|Q9Y6G9|DC1L1_HUMAN	1		_DYDDM(ox)S(ph)PR_	Oxidation (M),Phospho (STY)	sp|P61978|HNRPK_HUMAN	1
_AGGPAT(ph)PLSPTR_	Phospho (STY)	sp|Q03252|LMNB2_HUMAN	0.997		_AGM(ox)SSNQSISS(ph)PVLDAVPRT(ph)PSR_	Phospho (STY)	sp|Q9UQ35|SRRM2_HUMAN	0.892		_AGLAS(ph)PEEEDAVGKEPLK_	Phospho (STY)	sp|Q9UNS1|TIM_HUMAN	1		_AGLGSPERPPKTS(ph)PGS(ph)PR_	Oxidation (M),Phospho (STY)	sp|Q9H6F5|CCD86_HUMAN	0.971		_AGLS(ph)PANCQSDR_	Phospho (STY)	sp|Q14692|BMS1_HUMAN	1		_ALVVPEPEPDSDS(ph)NQER_	Phospho (STY)	sp|Q5VTR2|BRE1A_HUMAN	0.97		_ATSSS(ph)NPSS(ph)PAPDWYK_	2 Phospho (STY)	sp|P46100|ATRX_HUMAN	0.804		_DEEQSEADAGS(ph)GPPT(ph)PGPTTLGPK_	2 Phospho (STY)	sp|Q6ZRS2|SRCAP_HUMAN	0.997		_DGELPVEDDIDLS(ph)DVELDDLGK_	Phospho (STY)	sp|Q15084|PDIA6_HUMAN	1		_DYDDMS(ph)PR_	Phospho (STY)	sp|P61978|HNRPK_HUMAN	1
_AGGPATPLS(ph)PTR_	Phospho (STY)	sp|Q03252|LMNB2_HUMAN	0.803		_AGM(ox)SSNQSISSPVLDAVPRT(ph)PS(ph)RER_	Phospho (STY)	sp|Q9UQ35|SRRM2_HUMAN	1		_AGLES(ph)GAEPGDGDS(ph)DTTK_	2 Phospho (STY)	sp|O60832|DKC1_HUMAN	1		_AGLS(ph)PANCQSDR_	Phospho (STY)	sp|Q14692|BMS1_HUMAN	1		_AGM(ox)SSNQS(ph)ISS(ph)PVLDAVPR_	Oxidation (M),2 Phospho (STY)	sp|Q9UQ35|SRRM2_HUMAN	0.829		_AM(ox)ET(ph)RAM(ox)ETEVLET(ph)RVMER_	2 Oxidation (M),2 Phospho (STY)	sp|Q9H0L4|CSTFT_HUMAN	0.998		_ATVLT(ph)T(ph)ERK_	2 Phospho (STY)	sp|Q9UMS4|PRP19_HUMAN	1		_DEEQSEADAGS(ph)GPPTPGPTTLGPK_	Phospho (STY)	sp|Q6ZRS2|SRCAP_HUMAN	0.855		_DGLNQTTIPVS(ph)PPSTTKPSR_	Phospho (STY)	sp|Q71RC2|LARP4_HUMAN	0.899		_EAARS(ph)PDKPGGS(ph)PSASR_	2 Phospho (STY)	sp|Q9Y3T9|NOC2L_HUMAN	0.999
_AGGPTT(ph)PLS(ph)PTR_	2 Phospho (STY)	sp|P20700|LMNB1_HUMAN	0.997		_AGS(ph)S(ph)TPGDAPPAVAEVQGR_	Oxidation (M),Phospho (STY)	sp|Q7Z6Z7|HUWE1_HUMAN	0.819		_AGLES(ph)GAEPGDGDS(ph)DTTKK_	2 Phospho (STY)	sp|O60832|DKC1_HUMAN	0.997		_AGM(ox)SSNQSISS(ph)PVLDAVPR_	Phospho (STY)	sp|Q9UQ35|SRRM2_HUMAN	0.995		_AGM(ox)SSNQSIS(ph)S(ph)PVLDAVPR_	Oxidation (M),2 Phospho (STY)	sp|Q9UQ35|SRRM2_HUMAN	0.812		_AM(ox)PIT(ph)LHLLQSTRVGM(ox)S(ph)VNALRK_	2 Oxidation (M),2 Phospho (STY)	sp|Q15560|TCEA2_HUMAN	0.985		_ATVT(ph)PS(ph)PVK_	2 Phospho (STY)	sp|Q9H1E3|NUCKS_HUMAN	1		_DELAELS(ph)EAES(ph)EGDEKPK_	2 Phospho (STY)	sp|Q3L8U1|CHD9_HUMAN	1		_DGQDAIAQS(ph)PEK_	Phospho (STY)	sp|Q9NWH9|SLTM_HUMAN	1		_EADDDEEVDDNIPEM(ox)PS(ph)PKK_	Oxidation (M),Phospho (STY)	sp|P26358|DNMT1_HUMAN	1
_AGGPTT(ph)PLSPTR_	2 Phospho (STY)	sp|P20700|LMNB1_HUMAN	0.996		_AGS(ph)STPGDAPPAVAEVQGR_	Phospho (STY)	sp|Q7Z6Z7|HUWE1_HUMAN	0.939		_AGLES(ph)GAEPGDGDSDTTK_	Phospho (STY)	sp|O60832|DKC1_HUMAN	1		_AGM(ox)SSNQSISSPVLDAVPRT(ph)PS(ph)RER_	Phospho (STY)	sp|Q9UQ35|SRRM2_HUMAN	1		_AGM(ox)SSNQSISS(ph)PVLDAVPR_	Oxidation (M),Phospho (STY)	sp|Q9UQ35|SRRM2_HUMAN	0.945		_ANS(ph)FVGTAQYVSPELLTEK_	Phospho (STY)	sp|Q6A1A2|PDPK2_HUMAN	1		_ATVTPS(ph)PVK_	Phospho (STY)	sp|Q9H1E3|NUCKS_HUMAN	0.99		_DELHIVEAEAM(ox)NY(ph)EGSPIK_	Oxidation (M),Phospho (STY)	sp|P06748|NPM_HUMAN	0.903		_DGQVINET(ph)SQHHDDLE_	Phospho (STY)	sp|P08670|VIME_HUMAN	0.87		_EAESWNS(ph)VS(ph)EGKQPR_	2 Phospho (STY)	sp|P51170|SCNNG_HUMAN	0.86
_AGGPTTPLS(ph)PTR_	Phospho (STY)	sp|P20700|LMNB1_HUMAN	0.961		_AGSS(ph)PAQGAQNEPPR_	Phospho (STY)	sp|Q9UGU0|TCF20_HUMAN	0.861		_AGLESGAEPGDGDS(ph)DTTK_	Phospho (STY)	sp|O60832|DKC1_HUMAN	1		_AGM(ox)SSNQSISSPVLDAVPRT(ph)PSR_	Oxidation (M),Phospho (STY)	sp|Q9UQ35|SRRM2_HUMAN	0.996		_AGS(ph)RLS(ph)AEER_	2 Phospho (STY)	sp|Q86Y82|STX12_HUMAN	1		_ANTS(ph)GDFEK_	Phospho (STY)	sp|P49792|RBP2_HUMAN	0.997		_AVTIANS(ph)PSKPSEK_	Phospho (STY)	sp|Q8NEF9|SRFB1_HUMAN	1		_DELHIVEAEAM(ox)NYEGS(ph)PIK_	Oxidation (M),Phospho (STY)	sp|P06748|NPM_HUMAN	1		_DGQVINETS(ph)QHHDDLE_	Phospho (STY)	sp|P08670|VIME_HUMAN	0.916		_EAET(ph)KSPLVS(ph)PSK_	2 Phospho (STY)	sp|P35612|ADDB_HUMAN	0.848
_AGGSAALS(ph)PSK_	Phospho (STY)	sp|Q92522|H1X_HUMAN	1		_AGSST(ph)PGDAPPAVAEVQGR_	Phospho (STY)	sp|Q7Z6Z7|HUWE1_HUMAN	0.879		_AGLESGAEPGDGDS(ph)DTTKK_	Phospho (STY)	sp|O60832|DKC1_HUMAN	0.999		_AGMSSNQSISS(ph)PVLDAVPR_	Phospho (STY)	sp|Q9UQ35|SRRM2_HUMAN	0.986		_AGS(ph)STPGDAPPAVAEVQGR_	Phospho (STY)	sp|Q7Z6Z7|HUWE1_HUMAN	0.828		_APAASEGNHTDGAEEAAGSCAQAPSHS(ph)PPNKPK_	Phospho (STY)	sp|Q92560|BAP1_HUMAN	0.908		_AVVVS(ph)PKEENK_	Phospho (STY)	sp|O75909|CCNK_HUMAN	1		_DGEGT(ph)EEGEK_	Phospho (STY)	sp|P23470|PTPRG_HUMAN	1		_DGTAPPPQSPGSPGTGQDEEWS(ph)DEESPRK_	Phospho (STY)	sp|Q9UKS6|PACN3_HUMAN	0.989		_EAETKS(ph)PLVS(ph)PSK_	2 Phospho (STY)	sp|P35612|ADDB_HUMAN	0.999
_AGGSAALS(ph)PSKK_	Phospho (STY)	sp|Q92522|H1X_HUMAN	0.942		_AGT(ph)EDEEEEEEGRR_	Phospho (STY)	sp|O95456|PSMG1_HUMAN	1		_AGLGS(ph)PERPPK_	Phospho (STY)	sp|Q9H6F5|CCD86_HUMAN	1		_AGNALT(ph)PELAPVQIK_	Phospho (STY)	sp|P0C1Z6|TFPT_HUMAN	1		_AHFNAM(ox)FQPSS(ph)PTR_	Oxidation (M),Phospho (STY)	sp|Q8WUA4|TF3C2_HUMAN	0.912		_APIDTS(ph)DVEEK_	Phospho (STY)	sp|Q06265|EXOS9_HUMAN	0.993		_CGSGPVHISGQHLVAVEEDAES(ph)EDEEEEDVK_	Phospho (STY)	sp|P06748|NPM_HUMAN	1		_DGGS(ph)GNST(ph)IIVSR_	2 Phospho (STY)	sp|Q7Z6Z7|HUWE1_HUMAN	0.876		_DHS(ph)PTPSVFNSDEER_	Phospho (STY)	sp|Q6UN15|FIP1_HUMAN	1		_EDLPAENGETKTEES(ph)PAS(ph)DEAGEK_	2 Phospho (STY)	sp|P05114|HMGN1_HUMAN	1
_AGLAS(ph)PEEEDAVGKEPLK_	Phospho (STY)	sp|Q9UNS1|TIM_HUMAN	1		_AGTDS(ph)PVSCASVTEER_	2 Phospho (STY)	sp|Q69YH5|CDCA2_HUMAN	0.855		_AGLGS(ph)PERPPKT(ph)SPGS(ph)PR_	3 Phospho (STY)	sp|Q9H6F5|CCD86_HUMAN	0.951		_AGS(ph)RLS(ph)AEER_	Phospho (STY)	sp|Q86Y82|STX12_HUMAN	1		_AHFNAM(ox)FQPSSPT(ph)R_	Oxidation (M),Phospho (STY)	sp|Q8WUA4|TF3C2_HUMAN	0.927		_APLNIPGT(ph)PVLEDFPQNDDEK_	Phospho (STY)	sp|Q15003|CND2_HUMAN	1		_CRS(ph)PGM(ox)LEPLGSSR_	Oxidation (M),Phospho (STY)	sp|Q9UQ35|SRRM2_HUMAN	1		_DGGS(ph)GNSTIIVSR_	Phospho (STY)	sp|Q7Z6Z7|HUWE1_HUMAN	0.996		_DIFYYEDDS(ph)EGEDIEK_	Phospho (STY)	sp|Q15361|TTF1_HUMAN	1		_EEAS(ph)DDDM(ox)EGDEAVVR_	Oxidation (M),Phospho (STY)	sp|O75643|U520_HUMAN	1
_AGLES(ph)GAEPGDGDS(ph)DTTK_	Phospho (STY)	sp|O60832|DKC1_HUMAN	0.999		_AHFNAM(ox)FQPSS(ph)PTR_	Phospho (STY)	sp|Q8WUA4|TF3C2_HUMAN	0.966		_AGLGS(ph)PERPPKTS(ph)PGS(ph)PR_	3 Phospho (STY)	sp|Q9H6F5|CCD86_HUMAN	0.948		_AGS(ph)STPGDAPPAVAEVQGR_	2 Phospho (STY)	sp|Q7Z6Z7|HUWE1_HUMAN	0.819		_AHFNAMFQPSS(ph)PTR_	Phospho (STY)	sp|Q8WUA4|TF3C2_HUMAN	0.808		_APPQTHLPSGASSGTGSASATHGGGS(ph)PPGTR_	Phospho (STY)	sp|P46379|BAG6_HUMAN	0.992		_DAAAHLQTSHKPSAEDAEGQS(ph)PLSQK_	Phospho (STY)	sp|Q96F24|NRBF2_HUMAN	0.983		_DGLHFLPHASSSAQS(ph)PCGS(ph)PGM(ox)K_	Oxidation (M),2 Phospho (STY)	sp|Q3V6T2|GRDN_HUMAN	0.981		_DITDPLSLNTCTDEGHVVLAS(ph)PLK_	Phospho (STY)	sp|Q7L2J0|MEPCE_HUMAN	0.986		_EEDEEPES(ph)PPEK_	Phospho (STY)	sp|Q9H1E3|NUCKS_HUMAN	1
_AGLES(ph)GAEPGDGDS(ph)DTTKK_	Phospho (STY)	sp|O60832|DKC1_HUMAN	0.957		_AHFNAMFQPSS(ph)PTR_	Phospho (STY)	sp|Q8WUA4|TF3C2_HUMAN	0.971		_AGLGSPERPPKT(ph)SPGS(ph)PR_	2 Phospho (STY)	sp|Q9H6F5|CCD86_HUMAN	0.978		_AGSRLS(ph)AEER_	Phospho (STY)	sp|Q86Y82|STX12_HUMAN	0.998		_AHLGS(ph)SDNVATM(ox)SNEER_	Oxidation (M),Phospho (STY)	sp|Q9Y6X4|F169A_HUMAN	0.993		_APQTSSS(ph)PPPVR_	Phospho (STY)	sp|Q8IYB3|SRRM1_HUMAN	0.99		_DAPTS(ph)PASVASSSSTPSSK_	Phospho (STY)	sp|Q04726|TLE3_HUMAN	0.991		_DGQDAIAQS(ph)PEK_	Phospho (STY)	sp|Q9NWH9|SLTM_HUMAN	1		_DKEVS(ph)DDEAEEK_	Phospho (STY)	sp|P07900|HS90A_HUMAN	1		_EEDEEPES(ph)PPEKK_	Phospho (STY)	sp|Q9H1E3|NUCKS_HUMAN	1
_AGLES(ph)GAEPGDGDSDTTK_	Oxidation (M),Phospho (STY)	sp|O60832|DKC1_HUMAN	1		_AHLGS(ph)SDNVATM(ox)SNEER_	2 Phospho (STY)	sp|Q9Y6X4|F169A_HUMAN	0.958		_AGLGSPERPPKTS(ph)PGS(ph)PR_	2 Phospho (STY)	sp|Q9H6F5|CCD86_HUMAN	0.935		_AGSSAAGASGWTSAGSLNSVPTNSAQQGHNS(ph)PDSPVTSAAK_	2 Phospho (STY)	sp|Q86XP3|DDX42_HUMAN	0.814		_AHPPVTSAPLS(ph)PPQPNDLYK_	Phospho (STY)	sp|Q4VCS5|AMOT_HUMAN	0.968		_APS(ph)DSSLGTPSDGRPELR_	Phospho (STY)	sp|Q15642|CIP4_HUMAN	1		_DAQRLS(ph)PIPEEVPK_	Phospho (STY)	sp|Q96T23|RSF1_HUMAN	1		_DGSS(ph)PPLLEK_	Phospho (STY)	sp|Q6W2J9|BCOR_HUMAN	0.951		_DKFS(ph)PFPVQDRPESSLVFK_	Phospho (STY)	sp|Q9UQ35|SRRM2_HUMAN	1		_EEDEPEERS(ph)GDETPGSEVPGDK_	Phospho (STY)	sp|Q1KMD3|HNRL2_HUMAN	1
_AGLES(ph)GAEPGDGDSDTTKK_	Phospho (STY)	sp|O60832|DKC1_HUMAN	1		_AHLS(ph)ENELEALEK_	2 Phospho (STY)	sp|P98175|RBM10_HUMAN	1		_AGLS(ph)PANCQSDR_	Phospho (STY)	sp|Q14692|BMS1_HUMAN	1		_AGSSAAGASGWTSAGSLNSVPTNSAQQGHNSPDS(ph)PVTSAAK_	Phospho (STY)	sp|Q86XP3|DDX42_HUMAN	0.867		_AIGSTSKPQES(ph)PK_	Phospho (STY)	sp|P18887|XRCC1_HUMAN	1		_APS(ph)PPPTASNSSNSQSEK_	Phospho (STY)	sp|Q8N108|MIER1_HUMAN	1		_DAS(ph)PINRWS(ph)PTR_	2 Phospho (STY)	sp|Q13523|PRP4B_HUMAN	1		_DHS(ph)DS(ph)DDQM(ox)LVAK_	Oxidation (M),2 Phospho (STY)	sp|Q9NW75|GPTC2_HUMAN	1		_DKS(ph)PVREPIDNLTPEER_	Phospho (STY)	sp|Q14498|RBM39_HUMAN	1		_EEEDKDDEEKPKIEDVGS(ph)DEEDDSGK_	Phospho (STY)	sp|P08238|HS90B_HUMAN	1
_AGLESGAEPGDGDS(ph)DTTK_	Phospho (STY)	sp|O60832|DKC1_HUMAN	0.997		_AHPPVTSAPLS(ph)PPQPNDLYK_	2 Phospho (STY)	sp|Q4VCS5|AMOT_HUMAN	1		_AGM(ox)SSNQS(ph)IS(ph)SPVLDAVPR_	Oxidation (M),2 Phospho (STY)	sp|Q9UQ35|SRRM2_HUMAN	0.868		_AHFNAM(ox)FQPSS(ph)PTR_	Phospho (STY)	sp|Q8WUA4|TF3C2_HUMAN	0.937		_AITSLLGGGS(ph)PK_	Phospho (STY)	sp|Q6KC79|NIPBL_HUMAN	1		_APVPSTCSSTFPEELS(ph)PPSHQAK_	Phospho (STY)	sp|Q14980|NUMA1_HUMAN	1		_DASSS(ph)PASTASSASSTSLK_	Phospho (STY)	sp|Q04724|TLE1_HUMAN	0.804		_DHS(ph)PTPS(ph)VFNSDEER_	2 Phospho (STY)	sp|Q6UN15|FIP1_HUMAN	0.955		_DLDEDELLGNLS(ph)ETELK_	Phospho (STY)	sp|Q9NYL9|TMOD3_HUMAN	0.931		_EELM(ox)S(ph)S(ph)DLEETAGSTSIPK_	Oxidation (M),2 Phospho (STY)	sp|O00567|NOP56_HUMAN	1
_AGLESGAEPGDGDS(ph)DTTKK_	Phospho (STY)	sp|O60832|DKC1_HUMAN	1		_AHS(ph)PALGVHSFSGVQR_	Phospho (STY)	sp|Q9H1A4|APC1_HUMAN	1		_AGM(ox)SSNQSISS(ph)PVLDAVPR_	Oxidation (M),Phospho (STY)	sp|Q9UQ35|SRRM2_HUMAN	0.994		_AHFNAMFQPSSPT(ph)R_	Phospho (STY)	sp|Q8WUA4|TF3C2_HUMAN	0.924		_AKEVELVS(ph)E_	Phospho (STY)	sp|O60832|DKC1_HUMAN	1		_APVQPQQS(ph)PAAAPGGTDEKPSGK_	Phospho (STY)	sp|Q13200|PSMD2_HUMAN	1		_DCLIEDS(ph)DDEAGQS_	Phospho (STY)	sp|Q2VPK5|CTU2_HUMAN	1		_DHS(ph)PTPS(ph)VFNSDEERYR_	2 Phospho (STY)	sp|Q6UN15|FIP1_HUMAN	0.84		_DLDEEGS(ph)EK_	Phospho (STY)	sp|O43719|HTSF1_HUMAN	1		_EELM(ox)SS(ph)DLEETAGSTSIPK_	Oxidation (M),Phospho (STY)	sp|O00567|NOP56_HUMAN	0.905
_AGLGS(ph)PERPPK_	Oxidation (M),Phospho (STY)	sp|Q9H6F5|CCD86_HUMAN	1		_AHS(ph)SPASLQLGAVSPGTLTPTGVVSGPAATPTAQHLR_	Phospho (STY)	sp|P46937|YAP1_HUMAN	0.934		_AGM(ox)SSNQSISSPVLDAVPRT(ph)PS(ph)RER_	Oxidation (M),2 Phospho (STY)	sp|Q9UQ35|SRRM2_HUMAN	1		_AHLS(ph)ENELEALEK_	Phospho (STY)	sp|P98175|RBM10_HUMAN	1		_AKNS(ph)PPQAPSTR_	Phospho (STY)	sp|Q8N1F8|S11IP_HUMAN	1		_AQAVS(ph)EEEEEEEGK_	Phospho (STY)	sp|Q9GZR7|DDX24_HUMAN	1		_DDEEKPKIEDVGS(ph)DEEDDSGK_	Phospho (STY)	sp|P08238|HS90B_HUMAN	1		_DHS(ph)PTPSVFNS(ph)DEER_	2 Phospho (STY)	sp|Q6UN15|FIP1_HUMAN	0.981		_DLDRPESQS(ph)PK_	Phospho (STY)	sp|Q8WUA4|TF3C2_HUMAN	0.994		_EENPES(ph)DGEPVVEDGTSVK_	Phospho (STY)	sp|Q13439|GOGA4_HUMAN	1
_AGLGS(ph)PERPPKT(ph)S(ph)PGSPR_	Phospho (STY)	sp|Q9H6F5|CCD86_HUMAN	0.891		_AHT(ph)PTPGIYM(ox)GRPTHSGGGGGGGGGGGGGGGGR_	Phospho (STY)	sp|Q13595|TRA2A_HUMAN	0.913		_AGM(ox)SSNQSISSPVLDAVPRT(ph)PSR_	Oxidation (M),Phospho (STY)	sp|Q9UQ35|SRRM2_HUMAN	0.948		_AHPPVTSAPLS(ph)PPQPNDLYK_	Phospho (STY)	sp|Q4VCS5|AMOT_HUMAN	1		_AKPAM(ox)PQDSVPS(ph)PR_	Oxidation (M),Phospho (STY)	sp|P53396|ACLY_HUMAN	0.995		_AQDGENEKNS(ph)EKEQDSEVSEDTK_	Phospho (STY)	sp|Q92922|SMRC1_HUMAN	0.994		_DDFES(ph)EEEDVK_	Phospho (STY)	sp|Q7Z6E9|RBBP6_HUMAN	1		_DHS(ph)PTPSVFNS(ph)DEERYR_	2 Phospho (STY)	sp|Q6UN15|FIP1_HUMAN	0.995		_DLESCS(ph)DDDNQGSK_	Phospho (STY)	sp|Q5T3I0|GPTC4_HUMAN	1		_EEPLS(ph)EEEPCTSTAIAS(ph)PEK_	2 Phospho (STY)	sp|Q9Y2X3|NOP58_HUMAN	1
_AGLGS(ph)PERPPKT(ph)SPGS(ph)PR_	Phospho (STY)	sp|Q9H6F5|CCD86_HUMAN	0.945		_AIGSTSKPQES(ph)PK_	Phospho (STY)	sp|P18887|XRCC1_HUMAN	1		_AGMTS(ph)LPGGPQSR_	Phospho (STY)	sp|Q9BZ11|ADA33_HUMAN	0.882		_AHS(ph)PALGVHSFSGVQR_	Phospho (STY)	sp|Q9H1A4|APC1_HUMAN	1		_AKPAMPQDS(ph)VPSPR_	Phospho (STY)	sp|P53396|ACLY_HUMAN	0.843		_AQGEPVAGHES(ph)PK_	Phospho (STY)	sp|O94979|SC31A_HUMAN	1		_DDGSSM(ox)SFYVRPS(ph)PAK_	Oxidation (M),Phospho (STY)	sp|Q9NYB0|TE2IP_HUMAN	1		_DHS(ph)PTPSVFNSDEER_	Phospho (STY)	sp|Q6UN15|FIP1_HUMAN	1		_DLFDLNS(ph)SEEDDTEGFSER_	Phospho (STY)	sp|Q9Y3T9|NOC2L_HUMAN	0.97		_EEPLS(ph)EEEPCTSTAIAS(ph)PEKK_	2 Phospho (STY)	sp|Q9Y2X3|NOP58_HUMAN	0.828
_AGLGS(ph)PERPPKTS(ph)PGS(ph)PR_	Phospho (STY)	sp|Q9H6F5|CCD86_HUMAN	0.933		_AIS(ph)TGSLASSTLNK_	Phospho (STY)	sp|Q12923|PTN13_HUMAN	0.906		_AGS(ph)RLS(ph)AEER_	2 Phospho (STY)	sp|Q86Y82|STX12_HUMAN	1		_AHS(ph)SPASLQLGAVSPGTLTPTGVVSGPAATPTAQHLR_	Phospho (STY)	sp|P46937|YAP1_HUMAN	0.82		_AKPAMPQDSVPS(ph)PR_	Phospho (STY)	sp|P53396|ACLY_HUMAN	0.909		_AQGEPVAGHES(ph)PKIPYEK_	Phospho (STY)	sp|O94979|SC31A_HUMAN	1		_DDPDGKQEAKPQQAAGM(ox)LS(ph)PK_	Oxidation (M),Phospho (STY)	sp|Q13428|TCOF_HUMAN	1		_DIEIS(ph)T(ph)EEEK_	2 Phospho (STY)	sp|Q4G0J3|LARP7_HUMAN	1		_DLFDYS(ph)PPLHK_	Phospho (STY)	sp|Q9NYF8|BCLF1_HUMAN	1		_EEPVS(ph)S(ph)GPEEAVGK_	2 Phospho (STY)	sp|O00567|NOP56_HUMAN	1
_AGLGSPERPPKT(ph)SPGS(ph)PR_	Phospho (STY)	sp|Q9H6F5|CCD86_HUMAN	0.903		_AITSLLGGGS(ph)PK_	Phospho (STY)	sp|Q6KC79|NIPBL_HUMAN	1		_AGS(ph)STPGDAPPAVAEVQGR_	Phospho (STY)	sp|Q7Z6Z7|HUWE1_HUMAN	0.949		_AHT(ph)PLNTPDPSTK_	Phospho (STY)	sp|Q9BYW2|SETD2_HUMAN	1		_AKPPADPAAAAS(ph)PCR_	Phospho (STY)	sp|Q9GZT9|EGLN1_HUMAN	1		_AQLGINEDHS(ph)EGDEK_	Phospho (STY)	sp|Q69YQ0|CYTSA_HUMAN	1		_DFQDYM(ox)EPEEGCQGS(ph)PQRR_	Oxidation (M),Phospho (STY)	sp|O43237|DC1L2_HUMAN	1		_DIEIS(ph)T(ph)EEEKDTGDLK_	2 Phospho (STY)	sp|Q4G0J3|LARP7_HUMAN	1		_DLFETGLEDENNS(ph)PLEDEESLESIR_	Phospho (STY)	sp|Q9HAW4|CLSPN_HUMAN	0.972		_EES(ph)EES(ph)EAEPVQR_	2 Phospho (STY)	sp|Q9BW71|HIRP3_HUMAN	1
_AGLGSPERPPKTS(ph)PGS(ph)PR_	2 Phospho (STY)	sp|Q9H6F5|CCD86_HUMAN	0.905		_AKEVELVS(ph)E_	Phospho (STY)	sp|O60832|DKC1_HUMAN	1		_AGSSAAGASGWTSAGSLNSVPTNSAQQGHNSPDS(ph)PVTSAAK_	Phospho (STY)	sp|Q86XP3|DDX42_HUMAN	0.958		_AHT(ph)PTPGIYM(ox)GRPTHSGGGGGGGGGGGGGGGGR_	Oxidation (M),Phospho (STY)	sp|Q13595|TRA2A_HUMAN	0.888		_AKS(ph)PVPKS(ph)PVEEAK_	2 Phospho (STY)	sp|P07197|NFM_HUMAN	1		_AQLS(ph)PGIYDDTSAR_	Phospho (STY)	sp|O75376|NCOR1_HUMAN	1		_DFQEYVEPGEDFPAS(ph)PQRR_	Phospho (STY)	sp|Q9Y6G9|DC1L1_HUMAN	1		_DIEVLS(ph)EDT(ph)DYEEDEVTK_	2 Phospho (STY)	sp|Q4LE39|ARI4B_HUMAN	1		_DLFSLDSEDPSPAS(ph)PPLR_	Phospho (STY)	sp|Q9BTK6|PAGR1_HUMAN	1		_EGEEPTVYS(ph)DEEEPKDESAR_	Phospho (STY)	sp|O00264|PGRC1_HUMAN	0.989
_AGLGSPERPPKTS(ph)PGSPR_	Phospho (STY)	sp|Q9H6F5|CCD86_HUMAN	0.855		_AKNS(ph)PPQAPSTR_	Phospho (STY)	sp|Q8N1F8|S11IP_HUMAN	1		_AGSSPCLGSSSAASS(ph)PPPPASR_	Phospho (STY)	sp|Q6ZRS2|SRCAP_HUMAN	0.942		_AHT(ph)PTPGIYMGRPTHSGGGGGGGGGGGGGGGGR_	Phospho (STY)	sp|Q13595|TRA2A_HUMAN	0.878		_AKS(ph)PVPKS(ph)PVEEK_	2 Phospho (STY)	sp|P07197|NFM_HUMAN	1		_AQPFGFIDS(ph)DTDAEEERIPATPVVIPM(ox)K_	Oxidation (M),Phospho (STY)	sp|Q14676|MDC1_HUMAN	0.801		_DFQHLISS(ph)PLKK_	Phospho (STY)	sp|Q15361|TTF1_HUMAN	0.851		_DIEVLS(ph)EDT(ph)DYEEDEVTKK_	2 Phospho (STY)	sp|Q4LE39|ARI4B_HUMAN	0.981		_DLLHPS(ph)PEEEK_	Phospho (STY)	sp|P42677|RS27_HUMAN	1		_EGEEPTVYS(ph)DEEEPKDESARK_	Phospho (STY)	sp|O00264|PGRC1_HUMAN	0.961
_AGLS(ph)PANCQSDR_	2 Phospho (STY)	sp|Q14692|BMS1_HUMAN	1		_AKPAMPQDSVPS(ph)PR_	Phospho (STY)	sp|P53396|ACLY_HUMAN	0.978		_AGTDS(ph)PVSCASVTEER_	Phospho (STY)	sp|Q69YH5|CDCA2_HUMAN	0.996		_AHTPT(ph)PGIYMGRPTHSGGGGGGGGGGGGGGGGR_	Phospho (STY)	sp|Q13595|TRA2A_HUMAN	0.92		_ALAAGADS(ph)PKTEEARPSPAPGPGT(ph)PTGTPTR_	2 Phospho (STY)	sp|Q4KMP7|TB10B_HUMAN	0.965		_AQQQEEQGS(ph)VNDVKEEEK_	Phospho (STY)	sp|Q9Y4W2|LAS1L_HUMAN	1		_DGDKS(ph)PM(ox)SSLQISNEK_	Oxidation (M),Phospho (STY)	sp|Q9UER7|DAXX_HUMAN	0.998		_DIPRTPS(ph)R_	Phospho (STY)	sp|Q9UQ35|SRRM2_HUMAN	0.998		_DLVLPTQALPAS(ph)PALK_	Phospho (STY)	sp|Q15554|TERF2_HUMAN	1		_EGETQGVAFEHESPADFQNS(ph)QS(ph)PVQDQDK_	2 Phospho (STY)	sp|P78332|RBM6_HUMAN	1
_AGM(ox)SSNQSISS(ph)PVLDAVPR_	Phospho (STY)	sp|Q9UQ35|SRRM2_HUMAN	0.986		_AKPPADPAAAAS(ph)PCR_	Phospho (STY)	sp|Q9GZT9|EGLN1_HUMAN	1		_AHFNAM(ox)FQPSS(ph)PTR_	Oxidation (M),Phospho (STY)	sp|Q8WUA4|TF3C2_HUMAN	0.937		_AIGSTSKPQES(ph)PK_	Phospho (STY)	sp|P18887|XRCC1_HUMAN	1		_ALAEEAS(ph)EEELPS(ph)DVDLNDPYFAEEVK_	2 Phospho (STY)	sp|Q9H501|ESF1_HUMAN	1		_AQQQEEQGS(ph)VNDVKEEEKEEK_	Phospho (STY)	sp|Q9Y4W2|LAS1L_HUMAN	1		_DGGS(ph)GNSTIIVSR_	Phospho (STY)	sp|Q7Z6Z7|HUWE1_HUMAN	0.97		_DKEVS(ph)DDEAEEK_	Phospho (STY)	sp|P07900|HS90A_HUMAN	1		_DLVQPDKPAS(ph)PK_	Phospho (STY)	sp|Q6PJT7|ZC3HE_HUMAN	1		_EGETQGVAFEHESPADFQNSQS(ph)PVQDQDK_	Phospho (STY)	sp|P78332|RBM6_HUMAN	0.944
_AGM(ox)SSNQSISSPVLDAVPRT(ph)PS(ph)RER_	Phospho (STY)	sp|Q9UQ35|SRRM2_HUMAN	1		_AKS(ph)PISSGSGGSHM(ox)SGTSSSSGM(ox)K_	Oxidation (M),Phospho (STY)	sp|Q15648|MED1_HUMAN	0.855		_AHLGS(ph)SDNVATM(ox)SNEER_	Oxidation (M),Phospho (STY)	sp|Q9Y6X4|F169A_HUMAN	0.995		_AIIS(ph)PR_	Phospho (STY)	sp|Q9UQ35|SRRM2_HUMAN	1		_ALDIDS(ph)DEESEPK_	Phospho (STY)	sp|Q96DR7|ARHGQ_HUMAN	1		_AQS(ph)TDSLGTSGSLQSK_	Phospho (STY)	sp|Q15276|RABE1_HUMAN	0.953		_DGLAPEKTS(ph)PDRDK_	Phospho (STY)	sp|Q7L4I2|RSRC2_HUMAN	0.972		_DKM(ox)EGS(ph)DFESSGGR_	Oxidation (M),Phospho (STY)	sp|Q8WYH8|ING5_HUMAN	0.995		_DM(ox)DEPS(ph)PVPNVEEVTLPK_	Oxidation (M),Phospho (STY)	sp|Q8TAQ2|SMRC2_HUMAN	1		_EGNTTEDDFPSS(ph)PGNGNK_	Phospho (STY)	sp|Q15007|FL2D_HUMAN	0.944
_AGM(ox)SSNQSISSPVLDAVPRT(ph)PSR_	Phospho (STY)	sp|Q9UQ35|SRRM2_HUMAN	0.953		_AKS(ph)PQPPVEEEDEHFDDTVVCLDTYNCDLHFK_	Phospho (STY)	sp|Q00839|HNRPU_HUMAN	1		_AHLS(ph)ENELEALEK_	Phospho (STY)	sp|P98175|RBM10_HUMAN	1		_AILGSYDSELTPAEYS(ph)PQLTR_	Phospho (STY)	sp|Q9Y6D9|MD1L1_HUMAN	0.84		_ALEAASLSQHPPSLCIS(ph)DS(ph)EEEEEERK_	2 Phospho (STY)	sp|O43159|RRP8_HUMAN	0.999		_AQT(ph)PPGPSLSGSK_	Phospho (STY)	sp|Q9UQ35|SRRM2_HUMAN	1		_DGQDAIAQS(ph)PEK_	Phospho (STY)	sp|Q9NWH9|SLTM_HUMAN	1		_DKS(ph)PVREPIDNLTPEER_	Phospho (STY)	sp|Q14498|RBM39_HUMAN	1		_DM(ox)PGGFLFEGLS(ph)DDEDDFHPNTR_	Oxidation (M),Phospho (STY)	sp|Q96S82|UBL7_HUMAN	1		_EGS(ph)EFSFS(ph)DGEVAEK_	2 Phospho (STY)	sp|Q9BVS4|RIOK2_HUMAN	0.939
_AGNALT(ph)PELAPVQIK_	Phospho (STY)	sp|P0C1Z6|TFPT_HUMAN	1		_AKS(ph)PTPESSTIASYVTLR_	Phospho (STY)	sp|Q9HAU0|PKHA5_HUMAN	0.961		_AHPPVTSAPLS(ph)PPQPNDLYK_	Phospho (STY)	sp|Q4VCS5|AMOT_HUMAN	1		_AIPGDQHPES(ph)PVHTEPM(ox)GIQGR_	Phospho (STY)	sp|Q14676|MDC1_HUMAN	0.998		_ALEEGDGSVSGSS(ph)PR_	Phospho (STY)	sp|Q8N3X1|FNBP4_HUMAN	0.999		_AQT(ph)PPGPSLSGSKS(ph)PCPQEK_	2 Phospho (STY)	sp|Q9UQ35|SRRM2_HUMAN	0.998		_DGQVINETS(ph)QHHDDLE_	Phospho (STY)	sp|P08670|VIME_HUMAN	0.956		_DLDEEGS(ph)EK_	Phospho (STY)	sp|O43719|HTSF1_HUMAN	1		_DMDEPS(ph)PVPNVEEVTLPK_	Phospho (STY)	sp|Q8TAQ2|SMRC2_HUMAN	1		_EIAIVHS(ph)DAEK_	Phospho (STY)	sp|Q9H307|PININ_HUMAN	1
_AGPDLPSLPSHALEDEGWAAAAPS(ph)PGS(ph)AR_	Phospho (STY)	sp|Q9H3Q1|BORG4_HUMAN	0.995		_AKS(ph)PVPKS(ph)PVEEAK_	Phospho (STY)	sp|P07197|NFM_HUMAN	1		_AHS(ph)PAEGASVESSSPGPK_	Phospho (STY)	sp|Q8NFG4|FLCN_HUMAN	1		_AIPGDQHPES(ph)PVHTEPMGIQGR_	2 Phospho (STY)	sp|Q14676|MDC1_HUMAN	0.959		_ALIQTCLNSPDS(ph)PPRSDPTTDQR_	Phospho (STY)	sp|P11831|SRF_HUMAN	0.933		_AQTLPTSVVTITSESS(ph)PGKR_	Phospho (STY)	sp|Q01082|SPTB2_HUMAN	0.845		_DGSS(ph)PPLLEK_	Phospho (STY)	sp|Q6W2J9|BCOR_HUMAN	0.954		_DLDRPESQS(ph)PK_	Phospho (STY)	sp|Q8WUA4|TF3C2_HUMAN	0.997		_DMES(ph)PTKLDVTLAK_	Phospho (STY)	sp|P27816|MAP4_HUMAN	0.955		_EIS(ph)DDEAEEEK_	Phospho (STY)	sp|P08238|HS90B_HUMAN	1
_AGPDLPSLPSHALEDEGWAAAAPS(ph)PGSAR_	Phospho (STY)	sp|Q9H3Q1|BORG4_HUMAN	0.869		_AKS(ph)PVPKS(ph)PVEEK_	Phospho (STY)	sp|P07197|NFM_HUMAN	1		_AHT(ph)PTPGIYM(ox)GRPTHSGGGGGGGGGGGGGGGGR_	Oxidation (M),Phospho (STY)	sp|Q13595|TRA2A_HUMAN	0.896		_AIS(ph)TGSLASSTLNK_	Phospho (STY)	sp|Q12923|PTN13_HUMAN	0.969		_ALLSLRS(ph)PK_	Phospho (STY)	sp|Q9UNF1|MAGD2_HUMAN	1		_AQVLATIHGHAGAFPAAGDAGEGAPGGGSS(ph)PER_	Phospho (STY)	sp|Q86WR7|PRSR2_HUMAN	0.923		_DHANYEEDENGDIT(ph)PIK_	Phospho (STY)	sp|Q99547|MPH6_HUMAN	1		_DLESCS(ph)DDDNQGSK_	Phospho (STY)	sp|Q5T3I0|GPTC4_HUMAN	1		_DNEEREQSSDLTPSGDVS(ph)PVKPLSR_	Phospho (STY)	sp|Q8WYQ5|DGCR8_HUMAN	0.987		_EIS(ph)DDEAEEEKGEK_	Phospho (STY)	sp|P08238|HS90B_HUMAN	1
_AGPTLTDENGDDLGLPPS(ph)PGDTSYYQDQVDDFHEAR_	Phospho (STY)	sp|Q9NQZ2|SAS10_HUMAN	0.986		_ALAAGADS(ph)PKTEEARPSPAPGPGT(ph)PTGTPTR_	Phospho (STY)	sp|Q4KMP7|TB10B_HUMAN	0.881		_AIGSTSKPQES(ph)PK_	Phospho (STY)	sp|P18887|XRCC1_HUMAN	1		_AITSLLGGGS(ph)PK_	Phospho (STY)	sp|Q6KC79|NIPBL_HUMAN	1		_ALPNNTSSS(ph)PQPK_	Phospho (STY)	sp|P04637|P53_HUMAN	0.988		_AQWGS(ph)NMQVTLIPTHDSEVMR_	Phospho (STY)	sp|P46821|MAP1B_HUMAN	0.994		_DHS(ph)PTPS(ph)VFNSDEER_	2 Phospho (STY)	sp|Q6UN15|FIP1_HUMAN	0.965		_DLFDYS(ph)PPLHK_	Phospho (STY)	sp|Q9NYF8|BCLF1_HUMAN	1		_DNTFFRES(ph)PVGR_	Phospho (STY)	sp|Q8NEY8|PPHLN_HUMAN	1		_EKEEKES(ph)EDKPEIEDVGS(ph)DEEEEK_	2 Phospho (STY)	sp|P07900|HS90A_HUMAN	1
_AGS(ph)SPAQGAQNEPPR_	Phospho (STY)	sp|Q9UGU0|TCF20_HUMAN	0.81		_ALDIDS(ph)DEESEPK_	Phospho (STY)	sp|Q96DR7|ARHGQ_HUMAN	0.999		_AIIS(ph)PR_	Phospho (STY)	sp|Q9UQ35|SRRM2_HUMAN	1		_AKNS(ph)PPQAPSTR_	Phospho (STY)	sp|Q8N1F8|S11IP_HUMAN	1		_ALPSLNTGSSS(ph)PR_	Phospho (STY)	sp|O14545|TRAD1_HUMAN	0.999		_ARGDS(ph)EALDEES_	Phospho (STY)	sp|Q7Z4V5|HDGR2_HUMAN	1		_DHS(ph)PTPSVFNS(ph)DEERYR_	2 Phospho (STY)	sp|Q6UN15|FIP1_HUMAN	0.961		_DLMNMQSSSLKLFS(ph)S(ph)FEQK_	2 Phospho (STY)	sp|Q9Y3R5|DOP2_HUMAN	0.997		_DQEPKPS(ph)PEPAAVSR_	Phospho (STY)	sp|Q9H7S9|ZN703_HUMAN	1		_EKT(ph)PS(ph)PKEEDEEPESPPEK_	2 Phospho (STY)	sp|Q9H1E3|NUCKS_HUMAN	1
_AGS(ph)STPGDAPPAVAEVQGR_	Phospho (STY)	sp|Q7Z6Z7|HUWE1_HUMAN	0.957		_ALEAASLSQHPPSLCIS(ph)DS(ph)EEEEEERK_	Phospho (STY)	sp|O43159|RRP8_HUMAN	1		_AIS(ph)TGSLASSTLNK_	Phospho (STY)	sp|Q12923|PTN13_HUMAN	0.927		_AKPAM(ox)PQDSVPS(ph)PR_	Oxidation (M),Phospho (STY)	sp|P53396|ACLY_HUMAN	0.981		_ALS(ph)PGRES(ph)PK_	2 Phospho (STY)	sp|Q13207|TBX2_HUMAN	1		_ARHDS(ph)PDLAPNVTYSLPR_	Phospho (STY)	sp|Q9BRD0|BUD13_HUMAN	1		_DHS(ph)PTPSVFNSDEER_	Phospho (STY)	sp|Q6UN15|FIP1_HUMAN	1		_DLPAQRGEES(ph)S(ph)EEEEK_	2 Phospho (STY)	sp|Q9BW71|HIRP3_HUMAN	1		_DRS(ph)PHRS(ph)SPSDTRPK_	2 Phospho (STY)	sp|Q8IWS0|PHF6_HUMAN	0.856		_EKT(ph)PSPKEEDEEPES(ph)PPEK_	2 Phospho (STY)	sp|Q9H1E3|NUCKS_HUMAN	0.989
_AGSNEDPILAPSGT(ph)PPPTIPPDETFGGR_	Phospho (STY)	sp|Q8IZL8|PELP1_HUMAN	0.935		_ALEEGDGSVSGSS(ph)PR_	Phospho (STY)	sp|Q8N3X1|FNBP4_HUMAN	0.994		_AITSLLGGGS(ph)PK_	Phospho (STY)	sp|Q6KC79|NIPBL_HUMAN	1		_AKPAMPQDSVPS(ph)PR_	Phospho (STY)	sp|P53396|ACLY_HUMAN	0.991		_ALSPVTS(ph)R_	Phospho (STY)	sp|Q96L91|EP400_HUMAN	0.98		_ARQEEGADAS(ph)EEDPTPAGEEDVK_	Phospho (STY)	sp|Q86X53|ERIC1_HUMAN	1		_DHS(ph)PTPSVFNSDEERYR_	Phospho (STY)	sp|Q6UN15|FIP1_HUMAN	0.978		_DLQEQDADAGS(ph)ER_	Phospho (STY)	sp|Q6P158|DHX57_HUMAN	1		_DSALAEAPEGLS(ph)PAPPAR_	Phospho (STY)	sp|Q9H9J4|UBP42_HUMAN	1		_EKTPS(ph)PKEEDEEPES(ph)PPEK_	2 Phospho (STY)	sp|Q9H1E3|NUCKS_HUMAN	0.999
_AGSRLS(ph)AEER_	Phospho (STY)	sp|Q86Y82|STX12_HUMAN	1		_ALELPLAAS(ph)S(ph)IPRPRTPSPESHR_	2 Phospho (STY)	sp|Q66K74|MAP1S_HUMAN	0.978		_AKEVELVS(ph)E_	Phospho (STY)	sp|O60832|DKC1_HUMAN	1		_AKPPADPAAAAS(ph)PCR_	Oxidation (M),Phospho (STY)	sp|Q9GZT9|EGLN1_HUMAN	1		_ALSSGGSITS(ph)PPLS(ph)PALPK_	2 Phospho (STY)	sp|Q6Y7W6|PERQ2_HUMAN	0.907		_ARS(ph)VS(ph)PPPK_	2 Phospho (STY)	sp|Q13247|SRSF6_HUMAN	1		_DIEIS(ph)T(ph)EEEK_	2 Phospho (STY)	sp|Q4G0J3|LARP7_HUMAN	1		_DLS(ph)TSPKPS(ph)PIPS(ph)PVLGR_	3 Phospho (STY)	sp|Q8NDI1|EHBP1_HUMAN	0.863		_DSQDAS(ph)AEQSDHDDEVASLASASGGFGTK_	Phospho (STY)	sp|Q6P2E9|EDC4_HUMAN	0.982		_EKTPSPKEEDEEPES(ph)PPEK_	Phospho (STY)	sp|Q9H1E3|NUCKS_HUMAN	0.999
_AGSSAAGASGWTSAGSLNSVPTNSAQQGHNS(ph)PDSPVTSAAK_	Oxidation (M),Phospho (STY)	sp|Q86XP3|DDX42_HUMAN	0.966		_ALIQTCLNSPDS(ph)PPRSDPTTDQR_	Phospho (STY)	sp|P11831|SRF_HUMAN	0.965		_AKNS(ph)PPQAPSTR_	Phospho (STY)	sp|Q8N1F8|S11IP_HUMAN	1		_AKS(ph)PISSGSGGSHMSGTSSSSGMK_	Phospho (STY)	sp|Q15648|MED1_HUMAN	0.997		_ALSSGGSITS(ph)PPLSPALPK_	Phospho (STY)	sp|Q6Y7W6|PERQ2_HUMAN	0.85		_AS(ph)DLEDEESAAR_	Phospho (STY)	sp|Q86VM9|ZCH18_HUMAN	1		_DIIRQPS(ph)EEEIIK_	Phospho (STY)	sp|Q15121|PEA15_HUMAN	1		_DLVQPDKPAS(ph)PK_	Phospho (STY)	sp|Q6PJT7|ZC3HE_HUMAN	1		_DSQDASAEQS(ph)DHDDEVASLASASGGFGTK_	Phospho (STY)	sp|Q6P2E9|EDC4_HUMAN	0.931		_ELAANSSRST(ph)T(ph)PRGK_	2 Phospho (STY)	sp|Q4AC94|C2CD3_HUMAN	0.89
_AGSSAAGASGWTSAGSLNSVPTNSAQQGHNSPDS(ph)PVTSAAK_	Phospho (STY)	sp|Q86XP3|DDX42_HUMAN	0.847		_ALLSLRS(ph)PK_	Phospho (STY)	sp|Q9UNF1|MAGD2_HUMAN	1		_AKPAMPQDSVPS(ph)PR_	Phospho (STY)	sp|P53396|ACLY_HUMAN	0.894		_AKS(ph)PTPESSTIASYVTLR_	Phospho (STY)	sp|Q9HAU0|PKHA5_HUMAN	0.863		_ALSSLHGDDQDS(ph)EDEVLTIPEVK_	Phospho (STY)	sp|P11717|MPRI_HUMAN	1		_AS(ph)PAPGSGHPEGPGAHLDMNSLDR_	Phospho (STY)	sp|O94826|TOM70_HUMAN	0.984		_DIKEES(ph)DEEEEDDEESGRLR_	Phospho (STY)	sp|Q96EV2|RBM33_HUMAN	1		_DM(ox)DEPS(ph)PVPNVEEVTLPK_	Oxidation (M),Phospho (STY)	sp|Q8TAQ2|SMRC2_HUMAN	1		_DTDGGPKEEES(ph)PV_	Phospho (STY)	sp|P53985|MOT1_HUMAN	1		_EM(ox)EHNTVCAAGTS(ph)PVGEIGEEK_	Oxidation (M),Phospho (STY)	sp|P18583|SON_HUMAN	0.962
_AGTDS(ph)PVSCASVTEER_	Phospho (STY)	sp|Q69YH5|CDCA2_HUMAN	0.997		_ALPNNTSSS(ph)PQPK_	Phospho (STY)	sp|P04637|P53_HUMAN	0.972		_AKPPADPAAAAS(ph)PCR_	Phospho (STY)	sp|Q9GZT9|EGLN1_HUMAN	1		_AKS(ph)PVPKS(ph)PVEEAK_	Phospho (STY)	sp|P07197|NFM_HUMAN	1		_ALTDDS(ph)DENEEEDAFTDQK_	Phospho (STY)	sp|Q8NI35|INADL_HUMAN	1		_ASALLFS(ph)S(ph)DEEDQWNIPASQTHLASDSR_	2 Phospho (STY)	sp|Q641Q2|FA21A_HUMAN	0.865		_DIPRTPS(ph)R_	Phospho (STY)	sp|Q9UQ35|SRRM2_HUMAN	0.985		_DNEEREQSSDLTPS(ph)GDVS(ph)PVKPLSR_	2 Phospho (STY)	sp|Q8WYQ5|DGCR8_HUMAN	0.988		_DTS(ph)PSSGSAVSSSK_	Phospho (STY)	sp|Q8NEY8|PPHLN_HUMAN	0.995		_ENDLYVLPPLQEEEKHS(ph)S(ph)EEEDEK_	2 Phospho (STY)	sp|P28715|ERCC5_HUMAN	1
_AGTGYAS(ph)PDRTHVLAAGK_	Phospho (STY)	sp|O43379|WDR62_HUMAN	0.859		_ALPQT(ph)PRPR_	Phospho (STY)	sp|Q9UQ35|SRRM2_HUMAN	1		_AKPVGS(ph)PLFK_	Phospho (STY)	sp|Q92576|PHF3_HUMAN	1		_AKS(ph)PVPKS(ph)PVEEK_	Phospho (STY)	sp|P07197|NFM_HUMAN	1		_ALVEFESNPEETREPGS(ph)PPSVQR_	Phospho (STY)	sp|Q9H6F5|CCD86_HUMAN	0.999		_ASALLFSS(ph)DEEDQWNIPASQTHLASDSR_	Phospho (STY)	sp|Q641Q2|FA21A_HUMAN	0.877		_DKDVTLS(ph)PVK_	Phospho (STY)	sp|Q8NFC6|BD1L1_HUMAN	0.97		_DNQESS(ph)DAELS(ph)SSEYIK_	2 Phospho (STY)	sp|Q96JM3|CHAP1_HUMAN	0.98		_DTTVISHS(ph)PNTSYDTALEAR_	Phospho (STY)	sp|Q4VCS5|AMOT_HUMAN	0.995		_ENPPVEDS(ph)S(ph)DEDDKR_	2 Phospho (STY)	sp|Q8TCJ2|STT3B_HUMAN	1
_AHFNAM(ox)FQPSS(ph)PTR_	Phospho (STY)	sp|Q8WUA4|TF3C2_HUMAN	0.995		_ALPSLNTGSSS(ph)PR_	Phospho (STY)	sp|O14545|TRAD1_HUMAN	0.999		_AKS(ph)PISSGSGGSHM(ox)SGTSSSSGM(ox)K_	2 Oxidation (M),Phospho (STY)	sp|Q15648|MED1_HUMAN	0.999		_ALAAGADS(ph)PKTEEARPSPAPGPGT(ph)PTGTPTR_	Phospho (STY)	sp|Q4KMP7|TB10B_HUMAN	0.941		_ALVVPEPEPDS(ph)DS(ph)NQER_	2 Phospho (STY)	sp|Q5VTR2|BRE1A_HUMAN	1		_ASASRPQPAPADGADPPPAEEPEARPDGEGS(ph)PGK_	Phospho (STY)	sp|P11274|BCR_HUMAN	1		_DKEIS(ph)PSVTK_	Phospho (STY)	sp|Q8N488|RYBP_HUMAN	0.841		_DNTFFRES(ph)PVGR_	Phospho (STY)	sp|Q8NEY8|PPHLN_HUMAN	0.99		_DVM(ox)QQQLAEY(ph)QELLDVK_	Oxidation (M),Phospho (STY)	sp|Q03252|LMNB2_HUMAN	1		_ENPPVEDS(ph)S(ph)DEDDKRNQGNLYDK_	2 Phospho (STY)	sp|Q8TCJ2|STT3B_HUMAN	1
_AHLGS(ph)SDNVATM(ox)SNEER_	Phospho (STY)	sp|Q9Y6X4|F169A_HUMAN	0.991		_ALQLSNS(ph)PGASSAFLK_	Phospho (STY)	sp|Q12802|AKP13_HUMAN	0.899		_AKS(ph)PISSGSGGSHMSGTSSSSGM(ox)K_	Oxidation (M),Phospho (STY)	sp|Q15648|MED1_HUMAN	0.997		_ALASNTSFFSGCS(ph)PIEEEAH_	Phospho (STY)	sp|O95239|KIF4A_HUMAN	0.993		_ALVVPEPEPDS(ph)DSNQER_	Phospho (STY)	sp|Q5VTR2|BRE1A_HUMAN	0.834		_ASAVSELS(ph)PR_	Phospho (STY)	sp|Q9Y2W1|TR150_HUMAN	0.999		_DKEVS(ph)DDEAEEK_	Phospho (STY)	sp|P07900|HS90A_HUMAN	1		_DPAQPM(ox)S(ph)PGEATQSGARPADR_	Oxidation (M),Phospho (STY)	sp|Q9BQG0|MBB1A_HUMAN	0.995		_DVT(ph)PPPETEVVLIK_	Phospho (STY)	sp|P27816|MAP4_HUMAN	1		_ENVEYIEREES(ph)DGEYDEFGR_	Phospho (STY)	sp|O95218|ZRAB2_HUMAN	0.999
_AHLS(ph)ENELEALEK_	Phospho (STY)	sp|P98175|RBM10_HUMAN	1		_ALS(ph)PGRES(ph)PK_	Oxidation (M),Phospho (STY)	sp|Q13207|TBX2_HUMAN	1		_AKS(ph)PVPKS(ph)PVEEAK_	2 Phospho (STY)	sp|P07197|NFM_HUMAN	1		_ALDIDS(ph)DEESEPK_	Phospho (STY)	sp|Q96DR7|ARHGQ_HUMAN	1		_ALVVPEPEPDSDS(ph)NQER_	Phospho (STY)	sp|Q5VTR2|BRE1A_HUMAN	0.994		_ASEGLDACASPT(ph)K_	Phospho (STY)	sp|Q92618|ZN516_HUMAN	0.913		_DKLM(ox)DRHQDIS(ph)K_	Oxidation (M),Phospho (STY)	sp|Q5THR3|EFCB6_HUMAN	1		_DQPDGSSLS(ph)PAQS(ph)PSQSQPPAASSLR_	2 Phospho (STY)	sp|Q6WCQ1|MPRIP_HUMAN	0.901		_DVTNFTVGGFAPM(ox)S(ph)PR_	Oxidation (M),Phospho (STY)	sp|O00267|SPT5H_HUMAN	1		_ENVEYIEREES(ph)DGEYDEFGRK_	Phospho (STY)	sp|O95218|ZRAB2_HUMAN	0.971
_AHPPVTSAPLS(ph)PPQPNDLYK_	2 Phospho (STY)	sp|Q4VCS5|AMOT_HUMAN	1		_ALS(ph)PVIPLIPR_	Oxidation (M),Phospho (STY)	sp|O14686|KMT2D_HUMAN	1		_AKS(ph)PVPKS(ph)PVEEK_	2 Phospho (STY)	sp|P07197|NFM_HUMAN	1		_ALEEGDGSVSGSS(ph)PR_	Phospho (STY)	sp|Q8N3X1|FNBP4_HUMAN	0.998		_AM(ox)LDSGIYPPGS(ph)PGK_	Oxidation (M),Phospho (STY)	sp|O95295|SNAPN_HUMAN	1		_ASES(ph)SSEEKDDYEIFVK_	Phospho (STY)	sp|P18583|SON_HUMAN	0.851		_DKM(ox)EGS(ph)DFESSGGR_	Oxidation (M),Phospho (STY)	sp|Q8WYH8|ING5_HUMAN	1		_DQQPS(ph)GS(ph)EGEDDDAEAALKK_	2 Phospho (STY)	sp|Q9NXG2|THUM1_HUMAN	1		_DVTNFTVGGFAPMS(ph)PR_	Phospho (STY)	sp|O00267|SPT5H_HUMAN	1		_EPVADEEEEDS(ph)DDDVEPITEFR_	Phospho (STY)	sp|P54105|ICLN_HUMAN	1
_AHS(ph)PAEGASVESSSPGPK_	Phospho (STY)	sp|Q8NFG4|FLCN_HUMAN	1		_ALSSGGSITS(ph)PPLS(ph)PALPK_	Phospho (STY)	sp|Q6Y7W6|PERQ2_HUMAN	0.994		_ALAAGADS(ph)PKTEEARPSPAPGPGT(ph)PTGTPTR_	2 Phospho (STY)	sp|Q4KMP7|TB10B_HUMAN	0.857		_ALEKEPVPS(ph)ALPPS(ph)LIPPS(ph)K_	Phospho (STY)	sp|Q9UBC2|EP15R_HUMAN	1		_ANS(ph)FVGTAQYVSPELLTEK_	Phospho (STY)	sp|Q6A1A2|PDPK2_HUMAN	1		_ASGDPGASGM(ox)S(ph)PR_	Oxidation (M),Phospho (STY)	sp|Q8NDT2|RB15B_HUMAN	0.99		_DKRPLS(ph)GPDVGTPQPAGLASGAK_	Phospho (STY)	sp|O96013|PAK4_HUMAN	0.999		_DQS(ph)PFSK_	Phospho (STY)	sp|Q13427|PPIG_HUMAN	0.865		_DVYLS(ph)PR_	Phospho (STY)	sp|P38159|RBMX_HUMAN	1		_EQS(ph)EVSVS(ph)PR_	2 Phospho (STY)	sp|Q7L4I2|RSRC2_HUMAN	0.947
_AHS(ph)PALGVHSFSGVQR_	Phospho (STY)	sp|Q9H1A4|APC1_HUMAN	1		_ALSSGGSITS(ph)PPLSPALPK_	Phospho (STY)	sp|Q6Y7W6|PERQ2_HUMAN	0.93		_ALAAGADS(ph)PKTEEARPSPAPGPGTPTGTPTR_	Phospho (STY)	sp|Q4KMP7|TB10B_HUMAN	0.907		_ALELPLAAS(ph)S(ph)IPRPRTPSPESHR_	Phospho (STY)	sp|Q66K74|MAP1S_HUMAN	0.942		_ANT(ph)PDS(ph)DITEK_	2 Phospho (STY)	sp|Q9H4L7|SMRCD_HUMAN	0.999		_ASGDPGASGMS(ph)PR_	Phospho (STY)	sp|Q8NDT2|RB15B_HUMAN	0.999		_DKS(ph)PSSLLEDAK_	Phospho (STY)	sp|P42684|ABL2_HUMAN	0.955		_DQS(ph)PPPS(ph)PPPSYHPPPPPTK_	2 Phospho (STY)	sp|Q9P206|K1522_HUMAN	0.992		_DVYLS(ph)PRDDGYSTK_	Phospho (STY)	sp|P38159|RBMX_HUMAN	1		_EQS(ph)EVSVSPR_	Phospho (STY)	sp|Q7L4I2|RSRC2_HUMAN	0.877
_AHS(ph)SPASLQLGAVSPGTLTPTGVVSGPAATPTAQHLR_	Phospho (STY)	sp|P46937|YAP1_HUMAN	0.956		_ALSSGGSITSPPLS(ph)PALPK_	Phospho (STY)	sp|Q6Y7W6|PERQ2_HUMAN	0.911		_ALDIDS(ph)DEESEPK_	Phospho (STY)	sp|Q96DR7|ARHGQ_HUMAN	0.997		_ALIQTCLNSPDS(ph)PPR_	Phospho (STY)	sp|P11831|SRF_HUMAN	0.93		_ANT(ph)PDS(ph)DITEKTEDSSVPETPDNERK_	2 Phospho (STY)	sp|Q9H4L7|SMRCD_HUMAN	0.95		_ASGGAQS(ph)PLR_	Phospho (STY)	sp|Q6NXT1|ANR54_HUMAN	1		_DKS(ph)PVREPIDNLTPEER_	Phospho (STY)	sp|Q14498|RBM39_HUMAN	1		_DRES(ph)RS(ph)PFLKPDER_	2 Phospho (STY)	sp|Q9H7N4|SFR19_HUMAN	1		_DYDDM(ox)S(ph)PR_	Oxidation (M),Phospho (STY)	sp|P61978|HNRPK_HUMAN	1		_ERDHS(ph)PTPSVFNS(ph)DEERYR_	2 Phospho (STY)	sp|Q6UN15|FIP1_HUMAN	0.834
_AHT(ph)PLNTPDPSTK_	Oxidation (M),Phospho (STY)	sp|Q9BYW2|SETD2_HUMAN	1		_ALSSLHGDDQDS(ph)EDEVLTIPEVK_	Oxidation (M),Phospho (STY)	sp|P11717|MPRI_HUMAN	1		_ALEEGDGSVSGSS(ph)PR_	Phospho (STY)	sp|Q8N3X1|FNBP4_HUMAN	0.993		_ALIQTCLNSPDS(ph)PPRSDPTTDQR_	2 Phospho (STY)	sp|P11831|SRF_HUMAN	0.984		_ANTS(ph)GDFEK_	Phospho (STY)	sp|P49792|RBP2_HUMAN	0.999		_ASLVALPEQT(ph)ASEEETPPPLLTK_	Phospho (STY)	sp|Q9UKV3|ACINU_HUMAN	0.937		_DLDEEGS(ph)EK_	Phospho (STY)	sp|O43719|HTSF1_HUMAN	1		_DRHDT(ph)PDPS(ph)PR_	2 Phospho (STY)	sp|Q9BRD0|BUD13_HUMAN	1		_DYDDMS(ph)PR_	Phospho (STY)	sp|P61978|HNRPK_HUMAN	1		_ERDKEVS(ph)DDEAEEK_	Phospho (STY)	sp|P07900|HS90A_HUMAN	1
_AHT(ph)PTPGIYM(ox)GRPTHSGGGGGGGGGGGGGGGGR_	Oxidation (M),Phospho (STY)	sp|Q13595|TRA2A_HUMAN	0.932		_ALT(ph)EPLSGRAASLLGADT(ph)PVK_	Phospho (STY)	sp|Q75VX8|GAREL_HUMAN	0.94		_ALELPLAAS(ph)S(ph)IPRPRTPSPESHR_	2 Phospho (STY)	sp|Q66K74|MAP1S_HUMAN	0.958		_ALLS(ph)LRSPK_	Phospho (STY)	sp|Q9UNF1|MAGD2_HUMAN	0.879		_APAGPSLEETSVSS(ph)PK_	Phospho (STY)	sp|Q6AI08|HEAT6_HUMAN	0.988		_ASLVALPEQTAS(ph)EEETPPPLLTK_	Phospho (STY)	sp|Q9UKV3|ACINU_HUMAN	0.997		_DLDRPESQS(ph)PK_	Phospho (STY)	sp|Q8WUA4|TF3C2_HUMAN	1		_DRPHASGT(ph)DGDES(ph)EEDPPEHKPSK_	2 Phospho (STY)	sp|Q96RS0|TGS1_HUMAN	0.944		_DYEIESQNPLAS(ph)PTNTLLGSAK_	Phospho (STY)	sp|Q7Z417|NUFP2_HUMAN	0.987		_ERRT(ph)PS(ph)DDEEDNLFAPPK_	2 Phospho (STY)	sp|Q9Y4E1|FA21C_HUMAN	1
_AHTPT(ph)PGIYM(ox)GRPTHSGGGGGGGGGGGGGGGGR_	Phospho (STY)	sp|Q13595|TRA2A_HUMAN	0.831		_ALTDDS(ph)DENEEEDAFTDQK_	Phospho (STY)	sp|Q8NI35|INADL_HUMAN	1		_ALIQTCLNSPDS(ph)PPRSDPTTDQR_	Phospho (STY)	sp|P11831|SRF_HUMAN	0.987		_ALLSLRS(ph)PK_	2 Phospho (STY)	sp|Q9UNF1|MAGD2_HUMAN	0.922		_APIDTS(ph)DVEEK_	Phospho (STY)	sp|Q06265|EXOS9_HUMAN	0.994		_ASM(ox)IAM(ox)MAGSDFIKT(ph)S(ph)T(ph)GK_	2 Oxidation (M),3 Phospho (STY)	sp|Q9Y315|DEOC_HUMAN	0.931		_DLEPGEVPS(ph)DSDEDGEHK_	Phospho (STY)	sp|Q96T58|MINT_HUMAN	0.815		_DRS(ph)PHRS(ph)SPSDTRPK_	2 Phospho (STY)	sp|Q8IWS0|PHF6_HUMAN	0.852		_EAARS(ph)PDKPGGSPSASR_	Phospho (STY)	sp|Q9Y3T9|NOC2L_HUMAN	1		_ERS(ph)LS(ph)RER_	2 Phospho (STY)	sp|P84103|SRSF3_HUMAN	1
_AIGGIILT(ph)ASHNPGGPNGDFGIK_	Oxidation (M),Phospho (STY)	sp|P36871|PGM1_HUMAN	0.958		_ALVEFESNPEETREPGS(ph)PPSVQR_	Phospho (STY)	sp|Q9H6F5|CCD86_HUMAN	0.991		_ALIQTCLNSPDSPPRS(ph)DPTTDQR_	Phospho (STY)	sp|P11831|SRF_HUMAN	0.81		_ALPNNTSSS(ph)PQPK_	Phospho (STY)	sp|P04637|P53_HUMAN	0.996		_APPQTHLPSGASSGTGSASATHGGGS(ph)PPGTR_	Phospho (STY)	sp|P46379|BAG6_HUMAN	0.998		_ASS(ph)LEDLVLK_	Phospho (STY)	sp|Q15477|SKIV2_HUMAN	0.995		_DLEPGEVPSDS(ph)DEDGEHK_	Phospho (STY)	sp|Q96T58|MINT_HUMAN	0.975		_DRS(ph)PHRSS(ph)PSDTRPK_	2 Phospho (STY)	sp|Q8IWS0|PHF6_HUMAN	0.872		_EAASSSSGTQPAPPAPAS(ph)PWDSKK_	Phospho (STY)	sp|Q9H7N4|SFR19_HUMAN	0.931		_ERS(ph)PALKS(ph)PLQSVVVR_	2 Phospho (STY)	sp|Q9Y2W1|TR150_HUMAN	0.998
_AIGSTSKPQES(ph)PK_	Oxidation (M),Phospho (STY)	sp|P18887|XRCC1_HUMAN	1		_ALVVPEPEPDS(ph)DS(ph)NQER_	Phospho (STY)	sp|Q5VTR2|BRE1A_HUMAN	1		_ALLSLRS(ph)PK_	Phospho (STY)	sp|Q9UNF1|MAGD2_HUMAN	0.999		_ALPQT(ph)PRPR_	Phospho (STY)	sp|Q9UQ35|SRRM2_HUMAN	1		_APQTS(ph)S(ph)SPPPVR_	2 Phospho (STY)	sp|Q8IYB3|SRRM1_HUMAN	0.93		_ASS(ph)PFR_	Phospho (STY)	sp|Q14978|NOLC1_HUMAN	1		_DLESCS(ph)DDDNQGSK_	Phospho (STY)	sp|Q5T3I0|GPTC4_HUMAN	1		_DRS(ph)PIRGS(ph)PR_	2 Phospho (STY)	sp|Q9HCD5|NCOA5_HUMAN	1		_EAAVSASDILQES(ph)AIHSPGTVEK_	Phospho (STY)	sp|Q96C57|CL043_HUMAN	0.832		_ERS(ph)PS(ph)PLRGNVVPS(ph)PLPTR_	3 Phospho (STY)	sp|Q9Y2V2|CHSP1_HUMAN	0.987
_AIIS(ph)PR_	Oxidation (M),Phospho (STY)	sp|Q9UQ35|SRRM2_HUMAN	1		_ALVVPEPEPDS(ph)DSNQER_	Phospho (STY)	sp|Q5VTR2|BRE1A_HUMAN	0.989		_ALPNNTSSS(ph)PQPK_	Phospho (STY)	sp|P04637|P53_HUMAN	0.992		_ALPSLNTGSSS(ph)PR_	Phospho (STY)	sp|O14545|TRAD1_HUMAN	0.993		_APQTS(ph)SS(ph)PPPVRR_	2 Phospho (STY)	sp|Q8IYB3|SRRM1_HUMAN	0.855		_ASS(ph)PPDRIDIFGR_	Phospho (STY)	sp|Q9NWB6|ARGL1_HUMAN	0.979		_DLFDYS(ph)PPLHK_	Phospho (STY)	sp|Q9NYF8|BCLF1_HUMAN	1		_DSAIPVES(ph)DTDDEGAPR_	Phospho (STY)	sp|Q96D46|NMD3_HUMAN	0.962		_EAGRS(ph)IHEIPR_	Phospho (STY)	sp|Q9Y618|NCOR2_HUMAN	1		_ERVPDS(ph)PS(ph)PAPS(ph)LEEGR_	3 Phospho (STY)	sp|Q9UI36|DACH1_HUMAN	1
_AIPGDQHPES(ph)PVHTEPM(ox)GIQGR_	Phospho (STY)	sp|Q14676|MDC1_HUMAN	0.999		_ALVVPEPEPDSDS(ph)NQER_	Phospho (STY)	sp|Q5VTR2|BRE1A_HUMAN	0.995		_ALPQT(ph)PRPR_	Phospho (STY)	sp|Q9UQ35|SRRM2_HUMAN	1		_ALPTSKPEGSLHSS(ph)PVGPSSSK_	Phospho (STY)	sp|Q9UPT8|ZC3H4_HUMAN	0.845		_APQTSS(ph)SPPPVR_	Phospho (STY)	sp|Q8IYB3|SRRM1_HUMAN	0.866		_ASSLSES(ph)SPPK_	Phospho (STY)	sp|Q9UHB6|LIMA1_HUMAN	0.852		_DLLHPS(ph)PEEEK_	Phospho (STY)	sp|P42677|RS27_HUMAN	1		_DSALAEAPEGLS(ph)PAPPAR_	Phospho (STY)	sp|Q9H9J4|UBP42_HUMAN	1		_EALAEAALES(ph)PRPALVR_	Phospho (STY)	sp|O14745|NHRF1_HUMAN	1		_ES(ph)M(ox)T(ph)KQLPESK_	Oxidation (M),2 Phospho (STY)	sp|Q92539|LPIN2_HUMAN	0.997
_AITSLLGGGS(ph)PK_	Phospho (STY)	sp|Q6KC79|NIPBL_HUMAN	1		_AM(ox)KPPGGESSNLFGS(ph)PEEATPSSRPNR_	Phospho (STY)	sp|Q9H910|HN1L_HUMAN	0.925		_ALPSLNTGSSS(ph)PR_	Phospho (STY)	sp|O14545|TRAD1_HUMAN	0.999		_ALQLSNS(ph)PGASSAFLK_	Phospho (STY)	sp|Q12802|AKP13_HUMAN	0.918		_APQTSSS(ph)PPPVR_	Phospho (STY)	sp|Q8IYB3|SRRM1_HUMAN	0.918		_ASSLSESS(ph)PPK_	Phospho (STY)	sp|Q9UHB6|LIMA1_HUMAN	0.853		_DLPAQRGEES(ph)S(ph)EEEEK_	2 Phospho (STY)	sp|Q9BW71|HIRP3_HUMAN	1		_DSDQVAQS(ph)DGEES(ph)PAAEEQLLGEHIK_	2 Phospho (STY)	sp|O94979|SC31A_HUMAN	1		_EDIKIT(ph)KER_	Phospho (STY)	sp|Q5T200|ZC3HD_HUMAN	1		_ES(ph)RRSES(ph)LS(ph)PR_	3 Phospho (STY)	sp|Q99590|SCAFB_HUMAN	0.956
_AKEVELVS(ph)E_	Phospho (STY)	sp|O60832|DKC1_HUMAN	1		_AM(ox)LDSGIYPPGS(ph)PGK_	Phospho (STY)	sp|O95295|SNAPN_HUMAN	1		_ALPTSKPEGSLHSS(ph)PVGPSSSK_	Phospho (STY)	sp|Q9UPT8|ZC3H4_HUMAN	0.845		_ALS(ph)PVIPLIPR_	Phospho (STY)	sp|O14686|KMT2D_HUMAN	1		_APQTSSS(ph)PPPVRR_	Phospho (STY)	sp|Q8IYB3|SRRM1_HUMAN	0.823		_ASSPS(ph)PLTIGTPESQR_	Phospho (STY)	sp|Q9NPI6|DCP1A_HUMAN	0.996		_DLQEQDADAGS(ph)ER_	Phospho (STY)	sp|Q6P158|DHX57_HUMAN	1		_DSENLAS(ph)PSEYPENGER_	Phospho (STY)	sp|P52948|NUP98_HUMAN	0.99		_EDKSPSEES(ph)APTTSPESVSGSVPSSGSSGR_	Phospho (STY)	sp|P54725|RD23A_HUMAN	0.856		_ESAAPAS(ph)PAPS(ph)PAPS(ph)PTPAPPQK_	3 Phospho (STY)	sp|Q3KQU3|MA7D1_HUMAN	0.976
_AKNS(ph)PPQAPSTR_	Phospho (STY)	sp|Q8N1F8|S11IP_HUMAN	1		_AMSTTSISS(ph)PQPGK_	Phospho (STY)	sp|Q9UJU6|DBNL_HUMAN	0.824		_ALQLSNS(ph)PGASSAFLK_	Phospho (STY)	sp|Q12802|AKP13_HUMAN	0.877		_ALSSGGSIT(ph)SPPLSPALPK_	Phospho (STY)	sp|Q6Y7W6|PERQ2_HUMAN	0.857		_APS(ph)AS(ph)PLALHASR_	2 Phospho (STY)	sp|Q8N3F8|MILK1_HUMAN	1		_ASSSGPRS(ph)PLDQR_	Phospho (STY)	sp|O14646|CHD1_HUMAN	0.997		_DLVQPDKPAS(ph)PK_	Phospho (STY)	sp|Q6PJT7|ZC3HE_HUMAN	1		_DSLIT(ph)PHVS(ph)R_	2 Phospho (STY)	sp|P49792|RBP2_HUMAN	1		_EDLCT(ph)KT(ph)ENLLGSY(ph)FPKK_	3 Phospho (STY)	sp|Q06323|PSME1_HUMAN	0.916		_ESEDKPEIEDVGS(ph)DEEEEK_	Phospho (STY)	sp|P07900|HS90A_HUMAN	1
_AKPAM(ox)PQDSVPS(ph)PR_	Phospho (STY)	sp|P53396|ACLY_HUMAN	0.955		_ANS(ph)FVGTAQYVSPELLTEK_	Phospho (STY)	sp|Q6A1A2|PDPK2_HUMAN	1		_ALS(ph)PGRES(ph)PK_	2 Phospho (STY)	sp|Q13207|TBX2_HUMAN	1		_ALSSGGSITS(ph)PPLS(ph)PALPK_	Phospho (STY)	sp|Q6Y7W6|PERQ2_HUMAN	0.946		_APS(ph)DSSLGTPSDGRPELR_	Phospho (STY)	sp|Q15642|CIP4_HUMAN	0.999		_ASSVSTKES(ph)PAR_	Phospho (STY)	sp|Q13428|TCOF_HUMAN	0.998		_DM(ox)DEPS(ph)PVPNVEEVTLPK_	Oxidation (M),Phospho (STY)	sp|Q8TAQ2|SMRC2_HUMAN	1		_DSLITPHVSRSS(ph)T(ph)PRES(ph)PCGK_	3 Phospho (STY)	sp|P49792|RBP2_HUMAN	0.974		_EDPQARPLEGSSSEDSPPEGQAPPSHS(ph)PR_	Phospho (STY)	sp|Q12789|TF3C1_HUMAN	0.981		_ESEDKPEIEDVGS(ph)DEEEEKK_	Phospho (STY)	sp|P07900|HS90A_HUMAN	1
_AKPAMPQDSVPS(ph)PR_	Phospho (STY)	sp|P53396|ACLY_HUMAN	0.911		_ANS(ph)LGDLYAQK_	Phospho (STY)	sp|Q13009|TIAM1_HUMAN	1		_ALS(ph)PVIPLIPR_	Phospho (STY)	sp|O14686|KMT2D_HUMAN	1		_ALSSGGSITS(ph)PPLSPALPK_	Phospho (STY)	sp|Q6Y7W6|PERQ2_HUMAN	0.998		_APS(ph)PPPTASNSSNSQSEK_	Phospho (STY)	sp|Q8N108|MIER1_HUMAN	1		_ASTAPGAEAS(ph)PSPCITER_	Phospho (STY)	sp|Q66PJ3|AR6P4_HUMAN	0.914		_DM(ox)ES(ph)PTKLDVTLAK_	Oxidation (M),Phospho (STY)	sp|P27816|MAP4_HUMAN	0.991		_DTDGGPKEEES(ph)PV_	Phospho (STY)	sp|P53985|MOT1_HUMAN	1		_EDVEVAES(ph)PLR_	Phospho (STY)	sp|Q99567|NUP88_HUMAN	1		_ESEDKPEIEDVGS(ph)DEEEEKKDGDK_	Phospho (STY)	sp|P07900|HS90A_HUMAN	1
_AKPPADPAAAAS(ph)PCR_	Phospho (STY)	sp|Q9GZT9|EGLN1_HUMAN	1		_ANS(ph)PEKPPEAGAAHKPR_	Phospho (STY)	sp|Q9UFC0|LRWD1_HUMAN	1		_ALSSGGSITS(ph)PPLS(ph)PALPK_	2 Phospho (STY)	sp|Q6Y7W6|PERQ2_HUMAN	0.972		_ALSSLHGDDQDS(ph)EDEVLTIPEVK_	Phospho (STY)	sp|P11717|MPRI_HUMAN	1		_APVPSTCSSTFPEELS(ph)PPSHQAK_	Phospho (STY)	sp|Q14980|NUMA1_HUMAN	0.999		_ASVPFSAWEVEVQM(ox)RVT(ph)GLGR_	Oxidation (M),Phospho (STY)	sp|Q9HAT1|LMA1L_HUMAN	1		_DM(ox)ESPT(ph)KLDVTLAK_	Oxidation (M),Phospho (STY)	sp|P27816|MAP4_HUMAN	0.828		_DTLSNPQS(ph)PQPS(ph)PYNS(ph)PKPQHK_	3 Phospho (STY)	sp|Q96PU5|NED4L_HUMAN	0.96		_EEAPAS(ph)PLRPLYPQIS(ph)PLK_	2 Phospho (STY)	sp|P85037|FOXK1_HUMAN	1		_ESEEGNPVRGS(ph)EEDS(ph)PKK_	2 Phospho (STY)	sp|O43719|HTSF1_HUMAN	1
_AKPS(ph)PHPIK_	Phospho (STY)	sp|Q9ULU4|PKCB1_HUMAN	1		_ANT(ph)PDS(ph)DITEK_	Oxidation (M),2 Phospho (STY)	sp|Q9H4L7|SMRCD_HUMAN	1		_ALSSGGSITS(ph)PPLSPALPK_	Phospho (STY)	sp|Q6Y7W6|PERQ2_HUMAN	0.996		_ALTDDS(ph)DENEEEDAFTDQK_	Phospho (STY)	sp|Q8NI35|INADL_HUMAN	0.985		_APVQPQQS(ph)PAAAPGGTDEKPSGK_	Phospho (STY)	sp|Q13200|PSMD2_HUMAN	1		_AT(ph)LNAFLY(ph)HMGQHSNK_	2 Phospho (STY)	sp|Q5T9A4|ATD3B_HUMAN	0.999		_DNEEREQSSDLTPSGDVS(ph)PVKPLSR_	Phospho (STY)	sp|Q8WYQ5|DGCR8_HUMAN	1		_DTS(ph)PSSGSAVSSSK_	Phospho (STY)	sp|Q8NEY8|PPHLN_HUMAN	0.968		_EEAPAS(ph)PLRPLYPQISPLK_	Phospho (STY)	sp|P85037|FOXK1_HUMAN	0.999		_ESEEGNPVRGSEEDS(ph)PKK_	Phospho (STY)	sp|O43719|HTSF1_HUMAN	1
_AKS(ph)PISSGSGGSHM(ox)SGTSSSSGM(ox)K_	Phospho (STY)	sp|Q15648|MED1_HUMAN	1		_ANT(ph)PDS(ph)DITEKTEDSSVPETPDNERK_	Phospho (STY)	sp|Q9H4L7|SMRCD_HUMAN	0.889		_ALSSLHGDDQDS(ph)EDEVLTIPEVK_	Phospho (STY)	sp|P11717|MPRI_HUMAN	1		_ALVAT(ph)PGKK_	Phospho (STY)	sp|P19338|NUCL_HUMAN	1		_APYS(ph)PTTSK_	Phospho (STY)	sp|Q96JH7|VCIP1_HUMAN	0.973		_ATAPQTQHVS(ph)PM(ox)R_	Oxidation (M),Phospho (STY)	sp|P29692|EF1D_HUMAN	1		_DNPS(ph)PEPQLDDIKR_	Phospho (STY)	sp|Q96JC9|EAF1_HUMAN	1		_DTSATSQSVNGS(ph)PQAEQPSLESTSK_	Phospho (STY)	sp|Q86WB0|NIPA_HUMAN	0.911		_EEAS(ph)DDDM(ox)EGDEAVVR_	Oxidation (M),Phospho (STY)	sp|O75643|U520_HUMAN	1		_ESGVVAVS(ph)PEKS(ph)ESPQKEDGLSSQLK_	2 Phospho (STY)	sp|Q96T58|MINT_HUMAN	0.837
_AKS(ph)PQPPVEEEDEHFDDTVVCLDTYNCDLHFK_	Phospho (STY)	sp|Q00839|HNRPU_HUMAN	1		_ANTS(ph)GDFEK_	2 Phospho (STY)	sp|P49792|RBP2_HUMAN	0.983		_ALTDDS(ph)DENEEEDAFTDQK_	Phospho (STY)	sp|Q8NI35|INADL_HUMAN	0.999		_ALVEFESNPEETREPGS(ph)PPSVQR_	Phospho (STY)	sp|Q9H6F5|CCD86_HUMAN	1		_AQAVS(ph)EEEEEEEGK_	Phospho (STY)	sp|Q9GZR7|DDX24_HUMAN	1		_ATAPQTQHVS(ph)PMR_	Phospho (STY)	sp|P29692|EF1D_HUMAN	1		_DNQES(ph)SDAELSSSEYIK_	Phospho (STY)	sp|Q96JM3|CHAP1_HUMAN	0.858		_DTSPDKGELVS(ph)DEEEDT_	Phospho (STY)	sp|Q9UPU7|TBD2B_HUMAN	1		_EEAS(ph)DDDMEGDEAVVR_	Phospho (STY)	sp|O75643|U520_HUMAN	1		_ESGVVAVS(ph)PEKSES(ph)PQKEDGLSSQLK_	2 Phospho (STY)	sp|Q96T58|MINT_HUMAN	0.98
_AKS(ph)PT(ph)PDGSER_	Phospho (STY)	sp|Q96MU7|YTDC1_HUMAN	0.999		_ANVSS(ph)PHREFPPATAR_	2 Phospho (STY)	sp|Q92530|PSMF1_HUMAN	0.941		_ALVEFESNPEETREPGS(ph)PPSVQR_	Phospho (STY)	sp|Q9H6F5|CCD86_HUMAN	0.999		_ALVVPEPEPDSDS(ph)NQER_	Phospho (STY)	sp|Q5VTR2|BRE1A_HUMAN	0.959		_AQDGENEKNS(ph)EKEQDSEVSEDTK_	Phospho (STY)	sp|Q92922|SMRC1_HUMAN	1		_ATDIPASAS(ph)PPPVAGVPFFK_	Phospho (STY)	sp|Q8N1G0|ZN687_HUMAN	1		_DNQESS(ph)DAELSSSEYIK_	Phospho (STY)	sp|Q96JM3|CHAP1_HUMAN	0.992		_DTTVISHS(ph)PNT(ph)SYDTALEAR_	2 Phospho (STY)	sp|Q4VCS5|AMOT_HUMAN	0.919		_EEATYGVWAERDS(ph)DDERPSFGGK_	Phospho (STY)	sp|Q9UBB9|TFP11_HUMAN	0.999		_ESRQES(ph)DPEDDDVK_	Phospho (STY)	sp|Q9H307|PININ_HUMAN	0.896
_AKS(ph)PVPKS(ph)PVEEAK_	Phospho (STY)	sp|P07197|NFM_HUMAN	1		_APAASEGNHTDGAEEAAGSCAQAPSHS(ph)PPNKPK_	Phospho (STY)	sp|Q92560|BAP1_HUMAN	0.96		_ALVVPEPEPDSDS(ph)NQER_	Phospho (STY)	sp|Q5VTR2|BRE1A_HUMAN	0.98		_AM(ox)KPPGGESSNLFGS(ph)PEEATPSSRPNR_	2 Phospho (STY)	sp|Q9H910|HN1L_HUMAN	0.995		_AQGEPVAGHES(ph)PK_	Phospho (STY)	sp|O94979|SC31A_HUMAN	1		_ATDSDLSS(ph)PR_	Phospho (STY)	sp|Q9BRD0|BUD13_HUMAN	0.958		_DNS(ph)PPPAFKPEPPK_	Phospho (STY)	sp|Q9UDY2|ZO2_HUMAN	1		_DVDDGS(ph)GS(ph)PHSPHQLSSK_	2 Phospho (STY)	sp|Q9H4A3|WNK1_HUMAN	0.946		_EEDCHS(ph)PTSKPPKPDQPLK_	Phospho (STY)	sp|P23588|IF4B_HUMAN	0.964		_ESRRS(ph)ES(ph)LS(ph)PR_	3 Phospho (STY)	sp|Q99590|SCAFB_HUMAN	0.993
_AKS(ph)PVPKS(ph)PVEEK_	Oxidation (M),2 Phospho (STY)	sp|P07197|NFM_HUMAN	1		_APAGPSLEETSVSS(ph)PK_	Phospho (STY)	sp|Q6AI08|HEAT6_HUMAN	0.958		_AM(ox)KPPGGESSNLFGS(ph)PEEATPSSRPNR_	Oxidation (M),Phospho (STY)	sp|Q9H910|HN1L_HUMAN	0.995		_AM(ox)LDSGIYPPGS(ph)PGK_	Phospho (STY)	sp|O95295|SNAPN_HUMAN	0.999		_AQGEPVAGHES(ph)PKIPYEK_	Phospho (STY)	sp|O94979|SC31A_HUMAN	0.999		_ATEDGEEDEVS(ph)AGEK_	Phospho (STY)	sp|Q9BXW9|FACD2_HUMAN	1		_DNTFFRES(ph)PVGR_	Phospho (STY)	sp|Q8NEY8|PPHLN_HUMAN	1		_DVDDGSGS(ph)PHS(ph)PHQLSSK_	2 Phospho (STY)	sp|Q9H4A3|WNK1_HUMAN	0.902		_EEDEEPES(ph)PPEK_	Phospho (STY)	sp|Q9H1E3|NUCKS_HUMAN	1		_ESS(ph)PEKEAEEGCPEK_	Phospho (STY)	sp|O43719|HTSF1_HUMAN	0.873
_ALAEEAS(ph)EEELPS(ph)DVDLNDPYFAEEVK_	Phospho (STY)	sp|Q9H501|ESF1_HUMAN	1		_APAS(ph)PGAGSDAQGPQFGWDHSLHK_	Phospho (STY)	sp|Q5T6F0|DCA12_HUMAN	0.974		_AM(ox)LDQLM(ox)GTS(ph)R_	2 Oxidation (M),Phospho (STY)	sp|Q9Y383|LC7L2_HUMAN	0.981		_ANS(ph)FVGTAQYVSPELLTEK_	Phospho (STY)	sp|Q6A1A2|PDPK2_HUMAN	1		_AQGVRS(ph)PLLR_	Phospho (STY)	sp|O60343|TBCD4_HUMAN	1		_ATENDIYNFFS(ph)PLNPVR_	Phospho (STY)	sp|P31943|HNRH1_HUMAN	1		_DQDLASCDRDRSS(ph)R_	Phospho (STY)	sp|Q9Y383|LC7L2_HUMAN	0.805		_DVEDM(ox)ELS(ph)DVEDDGSK_	Oxidation (M),Phospho (STY)	sp|Q5VT52|RPRD2_HUMAN	1		_EEDEEPES(ph)PPEKK_	Phospho (STY)	sp|Q9H1E3|NUCKS_HUMAN	1		_ESVPEFPLS(ph)PPK_	Phospho (STY)	sp|P16949|STMN1_HUMAN	1
_ALAEEAS(ph)EEELPSDVDLNDPYFAEEVK_	2 Phospho (STY)	sp|Q9H501|ESF1_HUMAN	0.997		_APENVT(ph)CTIPDGVPIDITVK_	Phospho (STY)	sp|Q9Y5Q9|TF3C3_HUMAN	0.93		_AM(ox)LDSGIYPPGS(ph)PGK_	Oxidation (M),Phospho (STY)	sp|O95295|SNAPN_HUMAN	1		_ANSWQLVET(ph)PEK_	Phospho (STY)	sp|Q9Y2H0|DLGP4_HUMAN	1		_AQLGINEDHS(ph)EGDEK_	Phospho (STY)	sp|Q69YQ0|CYTSA_HUMAN	1		_ATGGLCLLGAYADS(ph)DDDDNDVSEK_	Phospho (STY)	sp|Q8N3X1|FNBP4_HUMAN	1		_DQEPKPS(ph)PEPAAVSR_	Phospho (STY)	sp|Q9H7S9|ZN703_HUMAN	1		_DYDDM(ox)S(ph)PR_	Oxidation (M),Phospho (STY)	sp|P61978|HNRPK_HUMAN	1		_EEDEPEERS(ph)GDETPGSEVPGDK_	Phospho (STY)	sp|Q1KMD3|HNRL2_HUMAN	1		_ETAPEEPGS(ph)PAKS(ph)APAS(ph)PVQS(ph)PAK_	4 Phospho (STY)	sp|P35612|ADDB_HUMAN	1
_ALDIDS(ph)DEESEPK_	2 Phospho (STY)	sp|Q96DR7|ARHGQ_HUMAN	0.998		_APIDTS(ph)DVEEK_	Phospho (STY)	sp|Q06265|EXOS9_HUMAN	0.991		_ANS(ph)FVGTAQYVSPELLTEK_	Phospho (STY)	sp|Q6A1A2|PDPK2_HUMAN	1		_ANT(ph)PDS(ph)DITEK_	Phospho (STY)	sp|Q9H4L7|SMRCD_HUMAN	0.959		_AQLS(ph)PGIYDDTSAR_	Phospho (STY)	sp|O75376|NCOR1_HUMAN	0.987		_ATIS(ph)DEEIER_	Phospho (STY)	sp|Q9UQN3|CHM2B_HUMAN	1		_DQHLNNSSSS(ph)PQR_	Phospho (STY)	sp|Q15154|PCM1_HUMAN	0.987		_DYDDMS(ph)PR_	Phospho (STY)	sp|P61978|HNRPK_HUMAN	1		_EEEDKDDEEKPKIEDVGS(ph)DEEDDSGK_	Phospho (STY)	sp|P08238|HS90B_HUMAN	1		_ETAPEEPGS(ph)PAKS(ph)APAS(ph)PVQSPAK_	3 Phospho (STY)	sp|P35612|ADDB_HUMAN	0.992
_ALDISLSS(ph)GEEDEGDEEDSTAGTTK_	Phospho (STY)	sp|Q8IY81|SPB1_HUMAN	0.981		_APLKPYPVS(ph)PSDK_	Phospho (STY)	sp|P41252|SYIC_HUMAN	0.976		_ANS(ph)PEKPPEAGAAHKPR_	Phospho (STY)	sp|Q9UFC0|LRWD1_HUMAN	1		_ANVS(ph)SPHREFPPATAR_	Phospho (STY)	sp|Q92530|PSMF1_HUMAN	0.822		_AQQQEEQGS(ph)VNDVKEEEK_	Phospho (STY)	sp|Q9Y4W2|LAS1L_HUMAN	1		_ATNES(ph)EDEIPQLVPIGK_	Phospho (STY)	sp|O76021|RL1D1_HUMAN	0.999		_DQM(ox)Y(ph)YNLLK_	Oxidation (M),Phospho (STY)	sp|P42704|LPPRC_HUMAN	0.982		_EAARS(ph)PDKPGGS(ph)PSASR_	2 Phospho (STY)	sp|Q9Y3T9|NOC2L_HUMAN	0.976		_EEGS(ph)DIEDEDMEELLNDTR_	Phospho (STY)	sp|Q8NHQ9|DDX55_HUMAN	1		_ETES(ph)APGS(ph)PR_	2 Phospho (STY)	sp|Q6PKG0|LARP1_HUMAN	0.999
_ALEAASLSQHPPSLCIS(ph)DS(ph)EEEEEER_	Phospho (STY)	sp|O43159|RRP8_HUMAN	0.978		_APPQTHLPSGASSGTGSASATHGGGS(ph)PPGTR_	Phospho (STY)	sp|P46379|BAG6_HUMAN	0.997		_ANSWQLVET(ph)PEK_	Phospho (STY)	sp|Q9Y2H0|DLGP4_HUMAN	1		_ANVSS(ph)PHREFPPATAR_	Phospho (STY)	sp|Q92530|PSMF1_HUMAN	0.978		_AQS(ph)TDS(ph)LGTSGSLQSK_	2 Phospho (STY)	sp|Q15276|RABE1_HUMAN	0.971		_ATS(ph)PLVSLYPALECR_	Phospho (STY)	sp|Q96G74|OTUD5_HUMAN	0.962		_DQQPS(ph)GS(ph)EGEDDDAEAALKK_	2 Phospho (STY)	sp|Q9NXG2|THUM1_HUMAN	1		_EAARS(ph)PDKPGGSPS(ph)ASR_	2 Phospho (STY)	sp|Q9Y3T9|NOC2L_HUMAN	0.86		_EEHGGLIRS(ph)PR_	Phospho (STY)	sp|P26368|U2AF2_HUMAN	1		_ETQS(ph)PEQVK_	Phospho (STY)	sp|Q9NYF8|BCLF1_HUMAN	0.998
_ALEEGDGSVSGSS(ph)PR_	Phospho (STY)	sp|Q8N3X1|FNBP4_HUMAN	0.998		_APQTS(ph)SS(ph)PPPVRR_	Phospho (STY)	sp|Q8IYB3|SRRM1_HUMAN	0.869		_ANT(ph)PDS(ph)DITEK_	2 Phospho (STY)	sp|Q9H4L7|SMRCD_HUMAN	1		_APAASEGNHTDGAEEAAGSCAQAPSHS(ph)PPNKPK_	Oxidation (M),Phospho (STY)	sp|Q92560|BAP1_HUMAN	0.963		_AQS(ph)TDSLGTSGSLQSK_	Phospho (STY)	sp|Q15276|RABE1_HUMAN	0.973		_ATVT(ph)PS(ph)PVK_	2 Phospho (STY)	sp|Q9H1E3|NUCKS_HUMAN	1		_DQS(ph)PFSK_	Phospho (STY)	sp|Q13427|PPIG_HUMAN	0.997		_EAARS(ph)PDKPGGSPSASR_	Phospho (STY)	sp|Q9Y3T9|NOC2L_HUMAN	1		_EELM(ox)S(ph)SDLEETAGSTSIPK_	Oxidation (M),Phospho (STY)	sp|O00567|NOP56_HUMAN	0.9		_ETSVSKEDT(ph)DHEEKAS(ph)NEDVTK_	2 Phospho (STY)	sp|O75475|PSIP1_HUMAN	0.874
_ALELPLAAS(ph)S(ph)IPRPRTPSPESHR_	Phospho (STY)	sp|Q66K74|MAP1S_HUMAN	0.957		_APQTSSS(ph)PPPVR_	Oxidation (M),Phospho (STY)	sp|Q8IYB3|SRRM1_HUMAN	0.921		_ANT(ph)PDS(ph)DITEKTEDSSVPETPDNERK_	2 Phospho (STY)	sp|Q9H4L7|SMRCD_HUMAN	0.86		_APAGPSLEETSVSS(ph)PK_	Oxidation (M),Phospho (STY)	sp|Q6AI08|HEAT6_HUMAN	0.975		_AQT(ph)PPGPS(ph)LSGS(ph)KSPCPQEK_	3 Phospho (STY)	sp|Q9UQ35|SRRM2_HUMAN	0.902		_ATVTPS(ph)PVK_	Phospho (STY)	sp|Q9H1E3|NUCKS_HUMAN	1		_DRICS(ph)DEEEDEEK_	Phospho (STY)	sp|Q9NPG3|UBN1_HUMAN	1		_EAETKS(ph)PLVS(ph)PSK_	2 Phospho (STY)	sp|P35612|ADDB_HUMAN	0.942		_EELM(ox)SS(ph)DLEETAGSTSIPK_	Oxidation (M),Phospho (STY)	sp|O00567|NOP56_HUMAN	0.945		_EVAENQQNQS(ph)SDPEEEK_	Phospho (STY)	sp|O43491|E41L2_HUMAN	0.917
_ALELPLAASSIPRPRT(ph)PS(ph)PESHR_	Phospho (STY)	sp|Q66K74|MAP1S_HUMAN	0.872		_APQTSSS(ph)PPPVRR_	Phospho (STY)	sp|Q8IYB3|SRRM1_HUMAN	0.914		_ANTS(ph)GDFEK_	Phospho (STY)	sp|P49792|RBP2_HUMAN	0.977		_APAPPPKPET(ph)PEK_	Phospho (STY)	sp|Q9ULL5|PRR12_HUMAN	1		_AQT(ph)PPGPSLSGSK_	Phospho (STY)	sp|Q9UQ35|SRRM2_HUMAN	1		_AVAS(ph)PEATVSQTDENK_	Phospho (STY)	sp|Q641Q2|FA21A_HUMAN	1		_DRS(ph)PHRS(ph)SPSDTRPK_	2 Phospho (STY)	sp|Q8IWS0|PHF6_HUMAN	0.832		_ECINAAPDSPS(ph)K_	Phospho (STY)	sp|Q7Z569|BRAP_HUMAN	0.863		_EEPDSENIPQELLSNLGHPES(ph)PPRK_	Phospho (STY)	sp|Q13309|SKP2_HUMAN	0.999		_EVDEDS(ph)EPEREVR_	Phospho (STY)	sp|Q53GS9|SNUT2_HUMAN	1
_ALES(ph)PERPFLAILGGAK_	Phospho (STY)	sp|P00558|PGK1_HUMAN	1		_APS(ph)DSS(ph)LGTPSDGRPELR_	Phospho (STY)	sp|Q15642|CIP4_HUMAN	0.902		_APAASEGNHTDGAEEAAGSCAQAPSHS(ph)PPNKPK_	Phospho (STY)	sp|Q92560|BAP1_HUMAN	0.851		_APAS(ph)PGAGSDAQGPQFGWDHSLHK_	Phospho (STY)	sp|Q5T6F0|DCA12_HUMAN	1		_AQT(ph)PPGPSLSGSKS(ph)PCPQEK_	2 Phospho (STY)	sp|Q9UQ35|SRRM2_HUMAN	0.992		_AVEES(ph)S(ph)DEERQR_	2 Phospho (STY)	sp|Q9BW71|HIRP3_HUMAN	1		_DRT(ph)PPHLLYSDR_	Phospho (STY)	sp|Q8NDT2|RB15B_HUMAN	1		_EDLPAENGETKTEES(ph)PAS(ph)DEAGEK_	2 Phospho (STY)	sp|P05114|HMGN1_HUMAN	1		_EEPLS(ph)EEEPCTSTAIAS(ph)PEK_	2 Phospho (STY)	sp|Q9Y2X3|NOP58_HUMAN	1		_EVLYDS(ph)EGLS(ph)GEER_	2 Phospho (STY)	sp|Q9H7N4|SFR19_HUMAN	1
_ALFKPPEDSQDDES(ph)DSDAEEEQTTK_	Phospho (STY)	sp|Q13769|THOC5_HUMAN	0.909		_APS(ph)DSSLGTPSDGRPELR_	Phospho (STY)	sp|Q15642|CIP4_HUMAN	0.997		_APAGPSLEETSVSS(ph)PK_	Phospho (STY)	sp|Q6AI08|HEAT6_HUMAN	0.918		_APIDTS(ph)DVEEK_	Phospho (STY)	sp|Q06265|EXOS9_HUMAN	0.994		_AQTLPTSVVTITS(ph)ESSPGKR_	Phospho (STY)	sp|Q01082|SPTB2_HUMAN	0.81		_AVLSDS(ph)PQLSEGK_	Phospho (STY)	sp|Q7Z4H7|HAUS6_HUMAN	0.998		_DS(ph)EIELLTAGKK_	Phospho (STY)	sp|Q9NU22|MDN1_HUMAN	1		_EEAPAS(ph)PLRPLYPQIS(ph)PLK_	2 Phospho (STY)	sp|P85037|FOXK1_HUMAN	0.999		_EFITGDVEPTDAESEWHS(ph)ENEEEEK_	Phospho (STY)	sp|Q99733|NP1L4_HUMAN	1		_EVS(ph)DDEAEEK_	Phospho (STY)	sp|P07900|HS90A_HUMAN	1
_ALFKPPEDSQDDESDS(ph)DAEEEQTTK_	Oxidation (M),Phospho (STY)	sp|Q13769|THOC5_HUMAN	0.988		_APS(ph)LTDLVK_	Phospho (STY)	sp|O15014|ZN609_HUMAN	0.879		_APIDTS(ph)DVEEK_	Phospho (STY)	sp|Q06265|EXOS9_HUMAN	0.994		_APPQTHLPSGASSGTGSASATHGGGS(ph)PPGTR_	Phospho (STY)	sp|P46379|BAG6_HUMAN	0.997		_AQTLPTSVVTITSESS(ph)PGKR_	Phospho (STY)	sp|Q01082|SPTB2_HUMAN	0.911		_AVMLLHT(ph)HTIT(ph)SR_	2 Phospho (STY)	sp|Q92616|GCN1L_HUMAN	0.843		_DSAIPVES(ph)DTDDEGAPR_	Phospho (STY)	sp|Q96D46|NMD3_HUMAN	0.989		_EEAS(ph)DDDM(ox)EGDEAVVR_	Oxidation (M),Phospho (STY)	sp|O75643|U520_HUMAN	1		_EFS(ph)DQVLHS(ph)K_	2 Phospho (STY)	sp|Q5T1H1|EYS_HUMAN	1		_EVS(ph)DDEAEEKEDKEEEK_	Phospho (STY)	sp|P07900|HS90A_HUMAN	1
_ALIQTCLNSPDS(ph)PPRSDPTTDQR_	Phospho (STY)	sp|P11831|SRF_HUMAN	0.983		_APS(ph)PPLSQVFQTR_	Phospho (STY)	sp|Q9NRA8|4ET_HUMAN	1		_APPQTHLPSGASSGTGSASATHGGGS(ph)PPGTR_	Phospho (STY)	sp|P46379|BAG6_HUMAN	0.995		_APQAGAHTPLTPQPGLAPQQQS(ph)PK_	Phospho (STY)	sp|O15063|K0355_HUMAN	1		_ARGDS(ph)EALDEES_	Phospho (STY)	sp|Q7Z4V5|HDGR2_HUMAN	1		_AVPM(ox)APAPAS(ph)PGSSNDSSAR_	Oxidation (M),Phospho (STY)	sp|Q66K74|MAP1S_HUMAN	0.883		_DSAIPVESDT(ph)DDEGAPR_	Phospho (STY)	sp|Q96D46|NMD3_HUMAN	0.93		_EEDEEPES(ph)PPEK_	Phospho (STY)	sp|Q9H1E3|NUCKS_HUMAN	1		_EGDPVSLSTPLETEFGSPSELS(ph)PR_	Phospho (STY)	sp|Q9BUR4|WAP53_HUMAN	0.967		_EVYELLDS(ph)PGK_	Phospho (STY)	sp|P22234|PUR6_HUMAN	1
_ALLSLRS(ph)PK_	Phospho (STY)	sp|Q9UNF1|MAGD2_HUMAN	0.998		_APS(ph)PPPTASNSSNSQSEK_	Phospho (STY)	sp|Q8N108|MIER1_HUMAN	1		_APPQTHLPSGASSGTGSASATHGGGSPPGT(ph)R_	Phospho (STY)	sp|P46379|BAG6_HUMAN	0.85		_APQTS(ph)SSPPPVRR_	Phospho (STY)	sp|Q8IYB3|SRRM1_HUMAN	0.833		_ARHDS(ph)PDLAPNVTYSLPR_	Phospho (STY)	sp|Q9BRD0|BUD13_HUMAN	1		_AVQQHQHGYDS(ph)DEEVDSELGTWEHQLR_	Phospho (STY)	sp|Q8IWZ8|SUGP1_HUMAN	0.998		_DSALAEAPEGLS(ph)PAPPAR_	Phospho (STY)	sp|Q9H9J4|UBP42_HUMAN	0.999		_EEDEPEERS(ph)GDETPGSEVPGDK_	Phospho (STY)	sp|Q1KMD3|HNRL2_HUMAN	1		_EGEDGDQPTT(ph)PPKPLK_	Phospho (STY)	sp|P18858|DNLI1_HUMAN	0.953		_EY(ph)DS(ph)GDTDEIIAM(ox)K_	Oxidation (M),2 Phospho (STY)	sp|Q76FK4|NOL8_HUMAN	0.835
_ALPNNTSSS(ph)PQPK_	Phospho (STY)	sp|P04637|P53_HUMAN	0.995		_APVPEPGLDLSLSPRPDS(ph)PQPR_	Phospho (STY)	sp|Q8TAP8|PPR35_HUMAN	0.841		_APQT(ph)SSSPPPVRR_	Phospho (STY)	sp|Q8IYB3|SRRM1_HUMAN	0.848		_APQTSS(ph)S(ph)PPPVR_	2 Phospho (STY)	sp|Q8IYB3|SRRM1_HUMAN	0.877		_ARQEEGADAS(ph)EEDPTPAGEEDVK_	Phospho (STY)	sp|Q86X53|ERIC1_HUMAN	1		_AVSETPAVPPVS(ph)EDEDDDDDDATPPPVIAPRPEHTK_	Phospho (STY)	sp|Q13153|PAK1_HUMAN	0.995		_DSDQVAQS(ph)DGEESPAAEEQLLGEHIK_	Phospho (STY)	sp|O94979|SC31A_HUMAN	0.977		_EEEDKDDEEKPKIEDVGS(ph)DEEDDSGK_	Phospho (STY)	sp|P08238|HS90B_HUMAN	1		_EGEEPT(ph)VYSDEEEPKDESARK_	Phospho (STY)	sp|O00264|PGRC1_HUMAN	0.901		_EYVSNDAAQS(ph)DDEEK_	Phospho (STY)	sp|Q5JSH3|WDR44_HUMAN	1
_ALPQT(ph)PRPR_	Phospho (STY)	sp|Q9UQ35|SRRM2_HUMAN	1		_APVPSTCSSTFPEELS(ph)PPSHQAK_	Phospho (STY)	sp|Q14980|NUMA1_HUMAN	1		_APQTS(ph)S(ph)SPPPVR_	2 Phospho (STY)	sp|Q8IYB3|SRRM1_HUMAN	0.868		_APQTSS(ph)SPPPVR_	Phospho (STY)	sp|Q8IYB3|SRRM1_HUMAN	0.874		_ARS(ph)RTPPS(ph)APSQSR_	2 Phospho (STY)	sp|Q9UQ35|SRRM2_HUMAN	0.929		_AVT(ph)PVSQGSNSSSADPK_	Phospho (STY)	sp|O00512|BCL9_HUMAN	1		_DSENLAS(ph)PSEYPENGER_	Phospho (STY)	sp|P52948|NUP98_HUMAN	0.964		_EEGPPPPS(ph)PDGAS(ph)SDAEPEPPSGR_	2 Phospho (STY)	sp|Q9NTJ3|SMC4_HUMAN	0.81		_EGEEPTVYS(ph)DEEEPK_	Phospho (STY)	sp|O00264|PGRC1_HUMAN	0.947		_FAS(ph)DDEHDEHDENGATGPVK_	Phospho (STY)	sp|P05455|LA_HUMAN	1
_ALPSLNTGSSS(ph)PR_	Phospho (STY)	sp|O14545|TRAD1_HUMAN	0.997		_APVQPQQS(ph)PAAAPGGTDEKPSGK_	Phospho (STY)	sp|Q13200|PSMD2_HUMAN	1		_APQTSS(ph)SPPPVR_	Phospho (STY)	sp|Q8IYB3|SRRM1_HUMAN	0.872		_APQTSSS(ph)PPPVRR_	Oxidation (M),2 Phospho (STY)	sp|Q8IYB3|SRRM1_HUMAN	0.981		_ARS(ph)T(ph)PSPVLQPR_	2 Phospho (STY)	sp|Q8TEK3|DOT1L_HUMAN	0.935		_AVTIANS(ph)PSKPSEK_	Phospho (STY)	sp|Q8NEF9|SRFB1_HUMAN	0.999		_DSFS(ph)NQNT(ph)ETKDTK_	2 Phospho (STY)	sp|Q96QB1|RHG07_HUMAN	0.982		_EELM(ox)S(ph)S(ph)DLEETAGSTSIPK_	Oxidation (M),2 Phospho (STY)	sp|O00567|NOP56_HUMAN	1		_EGEEPTVYS(ph)DEEEPKDESAR_	Phospho (STY)	sp|O00264|PGRC1_HUMAN	1		_FEEESKEPVADEEEEDS(ph)DDDVEPITEFR_	Phospho (STY)	sp|P54105|ICLN_HUMAN	1
_ALQLSNS(ph)PGASSAFLK_	Phospho (STY)	sp|Q12802|AKP13_HUMAN	0.883		_AQAVS(ph)EEEEEEEGK_	Phospho (STY)	sp|Q9GZR7|DDX24_HUMAN	1		_APQTSS(ph)SPPPVRR_	Phospho (STY)	sp|Q8IYB3|SRRM1_HUMAN	0.844		_APS(ph)DSSLGTPSDGRPELR_	2 Phospho (STY)	sp|Q15642|CIP4_HUMAN	0.997		_ARS(ph)VS(ph)PPPK_	2 Phospho (STY)	sp|Q13247|SRSF6_HUMAN	1		_AVTTVTQSTPVPGPSVPPPEELQVS(ph)PGPR_	Phospho (STY)	sp|P51610|HCFC1_HUMAN	1		_DSGRGDS(ph)VSDSGSDALR_	Phospho (STY)	sp|Q53EL6|PDCD4_HUMAN	0.864		_EELM(ox)S(ph)SDLEETAGSTSIPK_	Oxidation (M),Phospho (STY)	sp|O00567|NOP56_HUMAN	0.861		_EGEEPTVYS(ph)DEEEPKDESARK_	Phospho (STY)	sp|O00264|PGRC1_HUMAN	0.815		_FRWNGM(ox)S(ph)R_	Oxidation (M),Phospho (STY)	sp|Q9HAV4|XPO5_HUMAN	1
_ALS(ph)PVIPLIPR_	Phospho (STY)	sp|O14686|KMT2D_HUMAN	1		_AQDGENEKNS(ph)EKEQDSEVSEDTK_	Phospho (STY)	sp|Q92922|SMRC1_HUMAN	1		_APQTSSS(ph)PPPVR_	Phospho (STY)	sp|Q8IYB3|SRRM1_HUMAN	0.917		_APS(ph)PPLSQVFQTR_	2 Phospho (STY)	sp|Q9NRA8|4ET_HUMAN	1		_ARSRT(ph)PPS(ph)APSQSR_	2 Phospho (STY)	sp|Q9UQ35|SRRM2_HUMAN	0.901		_AVVVS(ph)PKEENK_	Phospho (STY)	sp|O75909|CCNK_HUMAN	1		_DSISAVSSEKVS(ph)PSK_	Phospho (STY)	sp|P46821|MAP1B_HUMAN	0.995		_EELM(ox)SS(ph)DLEETAGSTSIPK_	Oxidation (M),Phospho (STY)	sp|O00567|NOP56_HUMAN	0.93		_EGES(ph)PAAGPPPQELVEEEPSAPPTLLEEETEDGSDK_	Phospho (STY)	sp|Q8IZL8|PELP1_HUMAN	0.992		_FSGEEGEIEDDES(ph)GTENR_	Phospho (STY)	sp|Q9Y2W1|TR150_HUMAN	0.866
_ALSSGGSITS(ph)PPLS(ph)PALPK_	Phospho (STY)	sp|Q6Y7W6|PERQ2_HUMAN	0.982		_AQGEPVAGHES(ph)PKIPYEK_	Phospho (STY)	sp|O94979|SC31A_HUMAN	0.998		_APQTSSS(ph)PPPVRR_	Phospho (STY)	sp|Q8IYB3|SRRM1_HUMAN	0.864		_APS(ph)PPPTASNSSNSQSEK_	2 Phospho (STY)	sp|Q8N108|MIER1_HUMAN	1		_AS(ph)DLEDEESAAR_	Phospho (STY)	sp|Q86VM9|ZCH18_HUMAN	1		_AYRPPS(ph)GEK_	Phospho (STY)	sp|P30414|NKTR_HUMAN	1		_DSLIT(ph)PHVS(ph)R_	2 Phospho (STY)	sp|P49792|RBP2_HUMAN	1		_EEPLS(ph)EEEPCTSTAIAS(ph)PEK_	2 Phospho (STY)	sp|Q9Y2X3|NOP58_HUMAN	1		_EGETQGVAFEHESPADFQNSQS(ph)PVQDQDK_	Phospho (STY)	sp|P78332|RBM6_HUMAN	0.993		_FSGEEGEIEDDES(ph)GTENREEK_	Phospho (STY)	sp|Q9Y2W1|TR150_HUMAN	0.996
_ALSSGGSITS(ph)PPLSPALPK_	Phospho (STY)	sp|Q6Y7W6|PERQ2_HUMAN	0.993		_AQGVRS(ph)PLLR_	Phospho (STY)	sp|O60343|TBCD4_HUMAN	1		_APS(ph)DSSLGTPSDGRPELR_	Phospho (STY)	sp|Q15642|CIP4_HUMAN	1		_APSAS(ph)PLALHASR_	Phospho (STY)	sp|Q8N3F8|MILK1_HUMAN	0.997		_AS(ph)DPGLPAEEPK_	Phospho (STY)	sp|P27708|PYR1_HUMAN	1		_AYS(ph)PEYR_	Phospho (STY)	sp|Q9UDY2|ZO2_HUMAN	1		_DSSDSADGRAT(ph)PSENLVPSSAR_	Phospho (STY)	sp|Q8N684|CPSF7_HUMAN	0.915		_EEPLS(ph)EEEPCTSTAIAS(ph)PEKK_	2 Phospho (STY)	sp|Q9Y2X3|NOP58_HUMAN	0.996		_EGFGLSENPFASLS(ph)PDEQK_	Phospho (STY)	sp|O15504|NUPL2_HUMAN	0.965		_FSKEEPVS(ph)S(ph)GPEEAVGK_	2 Phospho (STY)	sp|O00567|NOP56_HUMAN	1
_ALSSLHGDDQDS(ph)EDEVLTIPEVK_	Phospho (STY)	sp|P11717|MPRI_HUMAN	1		_AQLGINEDHS(ph)EGDEK_	Phospho (STY)	sp|Q69YQ0|CYTSA_HUMAN	1		_APS(ph)LTDLVK_	Phospho (STY)	sp|O15014|ZN609_HUMAN	0.987		_APVPEPGLDLSLSPRPDS(ph)PQPR_	Phospho (STY)	sp|Q8TAP8|PPR35_HUMAN	1		_AS(ph)LEDAPVDDLTR_	Phospho (STY)	sp|Q7Z2W4|ZCCHV_HUMAN	1		_CGGVEQASSS(ph)PR_	Phospho (STY)	sp|Q5VZL5|ZMYM4_HUMAN	0.98		_DTDGGPKEEES(ph)PV_	Phospho (STY)	sp|P53985|MOT1_HUMAN	1		_EEPVS(ph)S(ph)GPEEAVGK_	2 Phospho (STY)	sp|O00567|NOP56_HUMAN	1		_EGKPEIEGKPES(ph)EGEPGSETR_	Phospho (STY)	sp|Q96EI5|TCAL4_HUMAN	0.993		_FTDKDQQPS(ph)GS(ph)EGEDDDAEAALKK_	2 Phospho (STY)	sp|Q9NXG2|THUM1_HUMAN	1
_ALTDDS(ph)DENEEEDAFTDQK_	2 Phospho (STY)	sp|Q8NI35|INADL_HUMAN	0.997		_AQLS(ph)PGIYDDTSAR_	Phospho (STY)	sp|O75376|NCOR1_HUMAN	1		_APS(ph)PPLSQVFQTR_	Phospho (STY)	sp|Q9NRA8|4ET_HUMAN	1		_APVPSTCSSTFPEELS(ph)PPSHQAK_	Phospho (STY)	sp|Q14980|NUMA1_HUMAN	1		_AS(ph)PAPGSGHPEGPGAHLDM(ox)NSLDR_	Oxidation (M),Phospho (STY)	sp|O94826|TOM70_HUMAN	0.984		_CGSGPVHISGQHLVAVEEDAES(ph)EDEEEEDVK_	Phospho (STY)	sp|P06748|NPM_HUMAN	1		_DTFEHDPSES(ph)IDEFNK_	Phospho (STY)	sp|Q9NYF8|BCLF1_HUMAN	0.998		_EES(ph)EES(ph)EAEPVQR_	2 Phospho (STY)	sp|Q9BW71|HIRP3_HUMAN	1		_EGNTTEDDFPSS(ph)PGNGNK_	Phospho (STY)	sp|Q15007|FL2D_HUMAN	0.992		_GAAEEAELEDS(ph)DDEEKPVK_	Phospho (STY)	sp|Q9UBB9|TFP11_HUMAN	1
_ALTT(ph)PTHYK_	Phospho (STY)	sp|P52948|NUP98_HUMAN	0.969		_AQQQEEQGS(ph)VNDVKEEEK_	2 Phospho (STY)	sp|Q9Y4W2|LAS1L_HUMAN	1		_APS(ph)PPPTASNSSNSQSEK_	Phospho (STY)	sp|Q8N108|MIER1_HUMAN	1		_APVQPQQS(ph)PAAAPGGTDEKPSGK_	Phospho (STY)	sp|Q13200|PSMD2_HUMAN	1		_AS(ph)PAPGSGHPEGPGAHLDMNSLDR_	Phospho (STY)	sp|O94826|TOM70_HUMAN	0.998		_CRS(ph)PGM(ox)LEPLGSSR_	Oxidation (M),Phospho (STY)	sp|Q9UQ35|SRRM2_HUMAN	1		_DTPRPDHPPHDGHS(ph)PASR_	Phospho (STY)	sp|Q9C0J8|WDR33_HUMAN	0.993		_EFGYDSPHDLDS(ph)D_	Phospho (STY)	sp|Q96CW6|S7A6O_HUMAN	1		_EGPEPPEEVPPPTT(ph)PPVPK_	Phospho (STY)	sp|P48634|PRC2A_HUMAN	0.953		_GAAEEAELEDS(ph)DDEEKPVKQDDFPK_	Phospho (STY)	sp|Q9UBB9|TFP11_HUMAN	1
_ALVAT(ph)PGKK_	Phospho (STY)	sp|P19338|NUCL_HUMAN	1		_AQQQEEQGS(ph)VNDVKEEEKEEK_	Phospho (STY)	sp|Q9Y4W2|LAS1L_HUMAN	1		_APS(ph)PSSR_	Phospho (STY)	sp|Q9UQ35|SRRM2_HUMAN	0.974		_APYS(ph)PTTSK_	2 Phospho (STY)	sp|Q96JH7|VCIP1_HUMAN	0.981		_AS(ph)PEPQRENAS(ph)PAPGTTAEEAMSR_	2 Phospho (STY)	sp|P46379|BAG6_HUMAN	0.948		_CRS(ph)PGMLEPLGSSR_	Phospho (STY)	sp|Q9UQ35|SRRM2_HUMAN	1		_DTS(ph)PSSGSAVSSSK_	Phospho (STY)	sp|Q8NEY8|PPHLN_HUMAN	0.999		_EFITGDVEPTDAESEWHS(ph)ENEEEEK_	Phospho (STY)	sp|Q99733|NP1L4_HUMAN	0.965		_EGS(ph)PAPLEPEPGAAQPK_	Phospho (STY)	sp|Q01167|FOXK2_HUMAN	1		_GADNDGS(ph)GSESGYTTPK_	Phospho (STY)	sp|Q7Z417|NUFP2_HUMAN	0.952
_ALVEFESNPEETREPGS(ph)PPSVQR_	Phospho (STY)	sp|Q9H6F5|CCD86_HUMAN	0.998		_AQS(ph)PGAVEEILDR_	Phospho (STY)	sp|Q9NYM9|BET1L_HUMAN	1		_APVPSTCSSTFPEELS(ph)PPSHQAK_	Phospho (STY)	sp|Q14980|NUMA1_HUMAN	1		_AQAVS(ph)EEEEEEEGK_	Phospho (STY)	sp|Q9GZR7|DDX24_HUMAN	1		_AS(ph)PSPQPSSQPLQIHR_	Phospho (STY)	sp|Q9HC35|EMAL4_HUMAN	0.937		_CSDAAGYPHATHDLEGPPLDAYSIQGQHTIS(ph)PLDLAK_	Phospho (STY)	sp|Q15365|PCBP1_HUMAN	0.885		_DTSATSQSVNGS(ph)PQAEQPSLESTSK_	Phospho (STY)	sp|Q86WB0|NIPA_HUMAN	0.899		_EGALSRVS(ph)DES(ph)LSK_	2 Phospho (STY)	sp|Q08357|S20A2_HUMAN	0.999		_EGS(ph)PIPHDPEFGSK_	Phospho (STY)	sp|P85037|FOXK1_HUMAN	1		_GADNDGSGS(ph)ESGYTTPK_	Phospho (STY)	sp|Q7Z417|NUFP2_HUMAN	0.828
_ALVVPEPEPDS(ph)DSNQER_	4 Phospho (STY)	sp|Q5VTR2|BRE1A_HUMAN	0.83		_AQS(ph)TDS(ph)LGTSGSLQSK_	Phospho (STY)	sp|Q15276|RABE1_HUMAN	0.884		_APVQPQQS(ph)PAAAPGGTDEKPSGK_	Phospho (STY)	sp|Q13200|PSMD2_HUMAN	1		_AQDGENEKNS(ph)EKEQDSEVSEDTK_	Phospho (STY)	sp|Q92922|SMRC1_HUMAN	1		_ASAPERT(ph)PS(ph)PAPK_	2 Phospho (STY)	sp|Q63ZY6|NSN5C_HUMAN	1		_CTKQAVSM(ox)SS(ph)FPQETR_	Oxidation (M),Phospho (STY)	sp|Q8NHP7|EXD1_HUMAN	0.938		_DTSPDKGELVS(ph)DEEEDT_	Phospho (STY)	sp|Q9UPU7|TBD2B_HUMAN	1		_EGEEPT(ph)VYSDEEEPKDESAR_	Phospho (STY)	sp|O00264|PGRC1_HUMAN	0.99		_EIAIVHS(ph)DAEK_	Phospho (STY)	sp|Q9H307|PININ_HUMAN	1		_GADS(ph)GEEKEEGINREDK_	Phospho (STY)	sp|Q9BVG4|PBDC1_HUMAN	1
_ALVVPEPEPDSDS(ph)NQER_	Phospho (STY)	sp|Q5VTR2|BRE1A_HUMAN	0.957		_AQS(ph)YPDNHQEFSDYDNPIFEK_	Phospho (STY)	sp|Q9Y2U5|M3K2_HUMAN	0.908		_APVS(ph)GSRS(ph)PDREASGSGGR_	2 Phospho (STY)	sp|Q8N5F7|NKAP_HUMAN	0.844		_AQGEPVAGHES(ph)PKIPYEK_	Phospho (STY)	sp|O94979|SC31A_HUMAN	0.999		_ASASRPQPAPADGADPPPAEEPEARPDGEGS(ph)PGK_	Phospho (STY)	sp|P11274|BCR_HUMAN	1		_CTLPEHES(ph)PSQDISDACEAESTER_	Phospho (STY)	sp|Q32MZ4|LRRF1_HUMAN	0.984		_DTTVISHS(ph)PNTSYDTALEAR_	Phospho (STY)	sp|Q4VCS5|AMOT_HUMAN	0.975		_EGEEPTVYS(ph)DEEEPKDESAR_	Phospho (STY)	sp|O00264|PGRC1_HUMAN	0.987		_EIAIVHS(ph)DAEKEQEEEEQK_	Phospho (STY)	sp|Q9H307|PININ_HUMAN	1		_GAEAFGDS(ph)EEDGEDVFEVEK_	Phospho (STY)	sp|Q99549|MPP8_HUMAN	1
_AM(ox)KPPGGESSNLFGS(ph)PEEATPSSRPNR_	Phospho (STY)	sp|Q9H910|HN1L_HUMAN	0.975		_AQT(ph)PPGPSLSGSK_	Phospho (STY)	sp|Q9UQ35|SRRM2_HUMAN	1		_APVSGS(ph)RS(ph)PDREASGSGGR_	2 Phospho (STY)	sp|Q8N5F7|NKAP_HUMAN	0.88		_AQGVRS(ph)PLLR_	Phospho (STY)	sp|O60343|TBCD4_HUMAN	1		_ASAVSELS(ph)PR_	Phospho (STY)	sp|Q9Y2W1|TR150_HUMAN	1		_DAAAHLQTSHKPSAEDAEGQS(ph)PLSQK_	Phospho (STY)	sp|Q96F24|NRBF2_HUMAN	0.911		_DVEDM(ox)ELS(ph)DVEDDGSK_	Oxidation (M),Phospho (STY)	sp|Q5VT52|RPRD2_HUMAN	1		_EGETQGVAFEHESPADFQNS(ph)QSPVQDQDK_	Phospho (STY)	sp|P78332|RBM6_HUMAN	0.932		_EIAIVHS(ph)DAEKEQEEEEQKQEMEVK_	Phospho (STY)	sp|Q9H307|PININ_HUMAN	1		_GAGDGS(ph)DEEVDGK_	Phospho (STY)	sp|P35579|MYH9_HUMAN	1
_AM(ox)LDSGIYPPGS(ph)PGK_	Oxidation (M),Phospho (STY)	sp|O95295|SNAPN_HUMAN	1		_AQT(ph)PPGPSLSGSKS(ph)PCPQEK_	Phospho (STY)	sp|Q9UQ35|SRRM2_HUMAN	1		_APVSGSRS(ph)PDREASGSGGR_	Phospho (STY)	sp|Q8N5F7|NKAP_HUMAN	0.916		_AQLGINEDHS(ph)EGDEK_	2 Phospho (STY)	sp|Q69YQ0|CYTSA_HUMAN	1		_ASEGLDACASPT(ph)K_	Phospho (STY)	sp|Q92618|ZN516_HUMAN	0.884		_DAEYIYPSLES(ph)DDDDPALK_	Phospho (STY)	sp|Q9UPP1|PHF8_HUMAN	1		_DVYLS(ph)PR_	Phospho (STY)	sp|P38159|RBMX_HUMAN	1		_EGETQGVAFEHESPADFQNSQS(ph)PVQDQDK_	Phospho (STY)	sp|P78332|RBM6_HUMAN	0.947		_EIS(ph)DDEAEEEK_	Phospho (STY)	sp|P08238|HS90B_HUMAN	1		_GAGDGS(ph)DEEVDGKADGAEAKPAE_	Phospho (STY)	sp|P35579|MYH9_HUMAN	1
_ANS(ph)FVGTAQYVSPELLTEK_	Oxidation (M),Phospho (STY)	sp|Q6A1A2|PDPK2_HUMAN	1		_AQTLPTSVVTITSESS(ph)PGK_	Phospho (STY)	sp|Q01082|SPTB2_HUMAN	0.959		_APYS(ph)PTTSK_	Phospho (STY)	sp|Q96JH7|VCIP1_HUMAN	0.996		_AQLS(ph)PGIYDDTSAR_	Phospho (STY)	sp|O75376|NCOR1_HUMAN	1		_ASES(ph)S(ph)SEEKDDYEIFVK_	2 Phospho (STY)	sp|P18583|SON_HUMAN	0.85		_DAPIS(ph)PASIASSSSTPSSK_	Phospho (STY)	sp|Q04727|TLE4_HUMAN	1		_DVYLS(ph)PRDDGYSTK_	Phospho (STY)	sp|P38159|RBMX_HUMAN	1		_EGNTTEDDFPSS(ph)PGNGNK_	Phospho (STY)	sp|Q15007|FL2D_HUMAN	0.999		_EIS(ph)DDEAEEEKGEK_	Phospho (STY)	sp|P08238|HS90B_HUMAN	1		_GAVAAEGASDT(ph)EREEPTESQGLAAR_	Phospho (STY)	sp|Q9P1Y6|PHRF1_HUMAN	0.957
_ANS(ph)PEKPPEAGAAHKPR_	Phospho (STY)	sp|Q9UFC0|LRWD1_HUMAN	1		_AQTLPTSVVTITSESS(ph)PGKR_	Oxidation (M),Phospho (STY)	sp|Q01082|SPTB2_HUMAN	0.904		_AQAVS(ph)EEEEEEEGK_	Phospho (STY)	sp|Q9GZR7|DDX24_HUMAN	1		_AQNPDAKT(ph)T(ph)ELIR_	Phospho (STY)	sp|Q00059|TFAM_HUMAN	1		_ASES(ph)SSEEKDDYEIFVK_	Phospho (STY)	sp|P18583|SON_HUMAN	0.898		_DAPTS(ph)PASVASSSSTPSSK_	Phospho (STY)	sp|Q04726|TLE3_HUMAN	0.998		_DYDDM(ox)S(ph)PR_	Oxidation (M),Phospho (STY)	sp|P61978|HNRPK_HUMAN	1		_EGS(ph)EFSFS(ph)DGEVAEK_	2 Phospho (STY)	sp|Q9BVS4|RIOK2_HUMAN	1		_EIS(ph)DDEAEEEKGEKEEEDK_	Phospho (STY)	sp|P08238|HS90B_HUMAN	1		_GDDDEES(ph)DEEAVKK_	Phospho (STY)	sp|O43395|PRPF3_HUMAN	1
_ANSWQLVET(ph)PEK_	Phospho (STY)	sp|Q9Y2H0|DLGP4_HUMAN	1		_AQTPPGPSLSGSKS(ph)PCPQEK_	Oxidation (M),Phospho (STY)	sp|Q9UQ35|SRRM2_HUMAN	0.982		_AQDGENEKNS(ph)EKEQDSEVSEDTK_	Phospho (STY)	sp|Q92922|SMRC1_HUMAN	1		_AQQQEEQGS(ph)VNDVKEEEK_	Phospho (STY)	sp|Q9Y4W2|LAS1L_HUMAN	1		_ASGDPGASGM(ox)S(ph)PR_	Oxidation (M),Phospho (STY)	sp|Q8NDT2|RB15B_HUMAN	0.931		_DAQRLS(ph)PIPEEVPK_	Phospho (STY)	sp|Q96T23|RSF1_HUMAN	1		_DYDEEEQGYDS(ph)EKEK_	Phospho (STY)	sp|Q05519|SRS11_HUMAN	1		_EGS(ph)PAPLEPEPGAAQPK_	Phospho (STY)	sp|Q01167|FOXK2_HUMAN	1		_EKLQEEGGGS(ph)DEEETGSPSEDGMQSAR_	Phospho (STY)	sp|Q13610|PWP1_HUMAN	1		_GDQPAASGDS(ph)DDDEPPPLPR_	Phospho (STY)	sp|O00264|PGRC1_HUMAN	1
_ANT(ph)PDS(ph)DITEKTEDSSVPETPDNERK_	Phospho (STY)	sp|Q9H4L7|SMRCD_HUMAN	0.982		_ARGDS(ph)EALDEES_	Phospho (STY)	sp|Q7Z4V5|HDGR2_HUMAN	1		_AQGEPVAGHES(ph)PKIPYEK_	Phospho (STY)	sp|O94979|SC31A_HUMAN	1		_AQQQEEQGS(ph)VNDVKEEEKEEK_	Phospho (STY)	sp|Q9Y4W2|LAS1L_HUMAN	1		_ASGDPGASGMS(ph)PR_	Phospho (STY)	sp|Q8NDT2|RB15B_HUMAN	1		_DAS(ph)PINR_	Phospho (STY)	sp|Q13523|PRP4B_HUMAN	1		_DYGHS(ph)SSRDDYPSR_	Phospho (STY)	sp|P38159|RBMX_HUMAN	0.907		_EHPHS(ph)RS(ph)PS(ph)PEPR_	3 Phospho (STY)	sp|Q9UDY2|ZO2_HUMAN	1		_EKPDS(ph)DDDLDIASLVTAK_	Phospho (STY)	sp|Q86V48|LUZP1_HUMAN	1		_GDS(ph)ES(ph)EEDEDLEVPVPSR_	2 Phospho (STY)	sp|P13861|KAP2_HUMAN	1
_ANTS(ph)GDFEK_	Phospho (STY)	sp|P49792|RBP2_HUMAN	0.988		_ARHDS(ph)PDLAPNVTYSLPR_	Phospho (STY)	sp|Q9BRD0|BUD13_HUMAN	1		_AQGVRS(ph)PLLR_	Phospho (STY)	sp|O60343|TBCD4_HUMAN	1		_AQS(ph)RS(ph)RECDITK_	Phospho (STY)	sp|Q13427|PPIG_HUMAN	1		_ASGQAFELILS(ph)PR_	Phospho (STY)	sp|P16949|STMN1_HUMAN	1		_DAS(ph)PINRWS(ph)PTR_	2 Phospho (STY)	sp|Q13523|PRP4B_HUMAN	1		_DYTGCSTSESLS(ph)PVK_	Phospho (STY)	sp|O95297|MPZL1_HUMAN	0.995		_EHYPVSSPSS(ph)PS(ph)PPAQPGGVSR_	2 Phospho (STY)	sp|O75179|ANR17_HUMAN	0.81		_EKS(ph)PVREPVDNLSPEER_	Phospho (STY)	sp|Q86U06|RBM23_HUMAN	1		_GDVTAEEAAGAS(ph)PAK_	Phospho (STY)	sp|P49006|MRP_HUMAN	1
_ANVSS(ph)PHREFPPATAR_	Phospho (STY)	sp|Q92530|PSMF1_HUMAN	0.964		_ARQEEGADAS(ph)EEDPTPAGEEDVK_	Phospho (STY)	sp|Q86X53|ERIC1_HUMAN	1		_AQLGINEDHS(ph)EGDEK_	Phospho (STY)	sp|Q69YQ0|CYTSA_HUMAN	1		_AQS(ph)YPDNHQEFSDYDNPIFEK_	Oxidation (M),Phospho (STY)	sp|Q9Y2U5|M3K2_HUMAN	0.977		_ASIGQS(ph)PGLPSTTFK_	Phospho (STY)	sp|Q5VT52|RPRD2_HUMAN	0.995		_DASSS(ph)PASTASSASSTSLK_	Phospho (STY)	sp|Q04724|TLE1_HUMAN	0.926		_EAARS(ph)PDKPGGS(ph)PSASR_	2 Phospho (STY)	sp|Q9Y3T9|NOC2L_HUMAN	0.999		_EIAIVHS(ph)DAEK_	Phospho (STY)	sp|Q9H307|PININ_HUMAN	1		_EKT(ph)PELPEPSVK_	Phospho (STY)	sp|Q8IYB3|SRRM1_HUMAN	1		_GEAAAERPGEAAVASS(ph)PSK_	Phospho (STY)	sp|P29966|MARCS_HUMAN	0.909
_APAASEGNHTDGAEEAAGSCAQAPSHS(ph)PPNKPK_	Oxidation (M),Phospho (STY)	sp|Q92560|BAP1_HUMAN	0.992		_ARS(ph)RT(ph)PPSAPSQSR_	Phospho (STY)	sp|Q9UQ35|SRRM2_HUMAN	0.999		_AQQELVPPQQQAS(ph)PPQLPK_	Phospho (STY)	sp|O15027|SC16A_HUMAN	1		_AQT(ph)PPGPSLSGSK_	Phospho (STY)	sp|Q9UQ35|SRRM2_HUMAN	1		_ASLVALPEQTAS(ph)EEETPPPLLTK_	Phospho (STY)	sp|Q9UKV3|ACINU_HUMAN	0.962		_DDEEKPKIEDVGS(ph)DEEDDSGK_	Phospho (STY)	sp|P08238|HS90B_HUMAN	0.999		_EAARS(ph)PDKPGGSPSASR_	Phospho (STY)	sp|Q9Y3T9|NOC2L_HUMAN	1		_EIKCS(ph)PSES(ph)PLM(ox)EK_	Oxidation (M),2 Phospho (STY)	sp|Q8WUM9|S20A1_HUMAN	0.834		_EKT(ph)PS(ph)PKEEDEEPESPPEK_	2 Phospho (STY)	sp|Q9H1E3|NUCKS_HUMAN	1		_GEEGS(ph)DDDETENGPKPK_	Phospho (STY)	sp|Q6PD62|CTR9_HUMAN	1
_APAS(ph)PGAGSDAQGPQFGWDHSLHK_	Phospho (STY)	sp|Q5T6F0|DCA12_HUMAN	0.993		_ARS(ph)TPS(ph)PVLQPR_	Phospho (STY)	sp|Q8TEK3|DOT1L_HUMAN	0.817		_AQQQEEQGS(ph)VNDVKEEEK_	Phospho (STY)	sp|Q9Y4W2|LAS1L_HUMAN	1		_AQT(ph)PPGPSLSGSKS(ph)PCPQEK_	Phospho (STY)	sp|Q9UQ35|SRRM2_HUMAN	0.997		_ASM(ox)SEFLES(ph)EDGEVEQQR_	Oxidation (M),Phospho (STY)	sp|Q15022|SUZ12_HUMAN	1		_DDPDGKQEAKPQQAAGMLS(ph)PK_	Phospho (STY)	sp|Q13428|TCOF_HUMAN	1		_EAASSSSGTQPAPPAPAS(ph)PWDSKK_	Phospho (STY)	sp|Q9H7N4|SFR19_HUMAN	0.844		_EIPSAT(ph)QSPISK_	Phospho (STY)	sp|Q9BQG0|MBB1A_HUMAN	0.905		_ELLVSQHTVQLVGGLS(ph)PLSSPSDTK_	Phospho (STY)	sp|Q9UKV3|ACINU_HUMAN	0.983		_GEGDAPFSEPGTTSTQRPS(ph)S(ph)PETATK_	2 Phospho (STY)	sp|Q9UQ35|SRRM2_HUMAN	0.988
_APGYPS(ph)SPVTTASGTTLR_	Phospho (STY)	sp|Q9HCK8|CHD8_HUMAN	0.863		_ARS(ph)VS(ph)PPPK_	Phospho (STY)	sp|Q13247|SRSF6_HUMAN	1		_AQQQEEQGS(ph)VNDVKEEEKEEK_	Phospho (STY)	sp|Q9Y4W2|LAS1L_HUMAN	1		_AQTLPTSVVTITSES(ph)SPGKR_	3 Phospho (STY)	sp|Q01082|SPTB2_HUMAN	0.918		_ASPM(ox)PVPT(ph)ES(ph)S(ph)SQKT(ph)AVPPQVKLVK_	Oxidation (M),4 Phospho (STY)	sp|Q9Y6V0|PCLO_HUMAN	0.924		_DEILPTT(ph)PISEQK_	Phospho (STY)	sp|P23396|RS3_HUMAN	1		_EAASSSSGTQPAPPAPASPWDS(ph)KK_	Phospho (STY)	sp|Q9H7N4|SFR19_HUMAN	0.892		_EIS(ph)DDEAEEEK_	Phospho (STY)	sp|P08238|HS90B_HUMAN	1		_ELSNS(ph)PLRENS(ph)FGSPLEFR_	2 Phospho (STY)	sp|Q9UQ35|SRRM2_HUMAN	0.91		_GGDSIGET(ph)PT(ph)PGAS(ph)K_	3 Phospho (STY)	sp|O75533|SF3B1_HUMAN	1
_APIDTS(ph)DVEEK_	2 Phospho (STY)	sp|Q06265|EXOS9_HUMAN	0.993		_AS(ph)DLEDEESAAR_	Phospho (STY)	sp|Q86VM9|ZCH18_HUMAN	1		_AQS(ph)PGAVEEILDR_	Phospho (STY)	sp|Q9NYM9|BET1L_HUMAN	1		_AQTLPTSVVTITSESS(ph)PGK_	Phospho (STY)	sp|Q01082|SPTB2_HUMAN	0.958		_ASPS(ph)PQPSSQPLQIHR_	Phospho (STY)	sp|Q9HC35|EMAL4_HUMAN	0.981		_DELHIVEAEAM(ox)NYEGS(ph)PIK_	Oxidation (M),Phospho (STY)	sp|P06748|NPM_HUMAN	1		_EADDDEEVDDNIPEM(ox)PS(ph)PK_	Oxidation (M),Phospho (STY)	sp|P26358|DNMT1_HUMAN	1		_EIS(ph)DDEAEEEKGEK_	Phospho (STY)	sp|P08238|HS90B_HUMAN	1		_ELSNS(ph)PLRENSFGS(ph)PLEFR_	2 Phospho (STY)	sp|Q9UQ35|SRRM2_HUMAN	0.996		_GGDSIGET(ph)PT(ph)PGASK_	2 Phospho (STY)	sp|O75533|SF3B1_HUMAN	1
_APLKPYPVS(ph)PSDK_	2 Phospho (STY)	sp|P41252|SYIC_HUMAN	0.856		_AS(ph)LEDAPVDDLTR_	Oxidation (M),Phospho (STY)	sp|Q7Z2W4|ZCCHV_HUMAN	1		_AQS(ph)TDS(ph)LGTSGSLQSK_	2 Phospho (STY)	sp|Q15276|RABE1_HUMAN	0.91		_AQTLPTSVVTITSESS(ph)PGKR_	Phospho (STY)	sp|Q01082|SPTB2_HUMAN	0.982		_ASS(ph)HSS(ph)QTQGGGSVTK_	2 Phospho (STY)	sp|P02545|LMNA_HUMAN	0.819		_DELHIVEAEAMNYEGS(ph)PIK_	Phospho (STY)	sp|P06748|NPM_HUMAN	1		_EADDDEEVDDNIPEM(ox)PS(ph)PKK_	Oxidation (M),Phospho (STY)	sp|P26358|DNMT1_HUMAN	1		_EKEEKES(ph)EDKPEIEDVGS(ph)DEEEEK_	2 Phospho (STY)	sp|P07900|HS90A_HUMAN	1		_ELSNS(ph)PLRENSFGSPLEFR_	Phospho (STY)	sp|Q9UQ35|SRRM2_HUMAN	0.882		_GGRS(ph)RS(ph)S(ph)SPVTELASR_	3 Phospho (STY)	sp|Q9UQ35|SRRM2_HUMAN	0.827
_APLNIPGT(ph)PVLEDFPQNDDEK_	2 Phospho (STY)	sp|Q15003|CND2_HUMAN	1		_AS(ph)PAPGSGHPEGPGAHLDM(ox)NSLDR_	Phospho (STY)	sp|O94826|TOM70_HUMAN	0.999		_AQS(ph)TDSLGTSGSLQSK_	Phospho (STY)	sp|Q15276|RABE1_HUMAN	0.985		_AQTPPGPSLSGSKS(ph)PCPQEK_	Oxidation (M),Phospho (STY)	sp|Q9UQ35|SRRM2_HUMAN	0.928		_ASS(ph)LEDLVLK_	Phospho (STY)	sp|Q15477|SKIV2_HUMAN	0.951		_DELTES(ph)PK_	Phospho (STY)	sp|Q8NC51|PAIRB_HUMAN	0.998		_EAETKS(ph)PLVS(ph)PSK_	2 Phospho (STY)	sp|P35612|ADDB_HUMAN	0.952		_EKT(ph)PS(ph)PKEEDEEPESPPEK_	2 Phospho (STY)	sp|Q9H1E3|NUCKS_HUMAN	0.823		_EM(ox)EHNTVCAAGTS(ph)PVGEIGEEK_	Oxidation (M),Phospho (STY)	sp|P18583|SON_HUMAN	0.999		_GGRS(ph)RS(ph)SS(ph)PVTELASR_	3 Phospho (STY)	sp|Q9UQ35|SRRM2_HUMAN	0.96
_APPQTHLPSGASSGTGSASATHGGGS(ph)PPGTR_	Phospho (STY)	sp|P46379|BAG6_HUMAN	0.998		_AS(ph)PAPGSGHPEGPGAHLDMNSLDR_	Phospho (STY)	sp|O94826|TOM70_HUMAN	0.998		_AQS(ph)YPDNHQEFSDYDNPIFEK_	Phospho (STY)	sp|Q9Y2U5|M3K2_HUMAN	0.917		_ARGDS(ph)EALDEES_	Phospho (STY)	sp|Q7Z4V5|HDGR2_HUMAN	1		_ASS(ph)LGEIDESSELR_	Phospho (STY)	sp|Q16513|PKN2_HUMAN	0.944		_DFQDYMEPEEGCQGS(ph)PQRR_	Phospho (STY)	sp|O43237|DC1L2_HUMAN	1		_EAT(ph)M(ox)ELLRVK_	Oxidation (M),Phospho (STY)	sp|Q9P219|DAPLE_HUMAN	1		_EKT(ph)PSPKEEDEEPES(ph)PPEK_	2 Phospho (STY)	sp|Q9H1E3|NUCKS_HUMAN	0.997		_EMEHNTVCAAGTS(ph)PVGEIGEEK_	Phospho (STY)	sp|P18583|SON_HUMAN	0.992		_GGS(ph)GYHS(ph)RS(ph)PAR_	3 Phospho (STY)	sp|Q9UQ35|SRRM2_HUMAN	0.971
_APQAGAHTPLTPQPGLAPQQQS(ph)PK_	Phospho (STY)	sp|O15063|K0355_HUMAN	1		_AS(ph)PEPQRENAS(ph)PAPGTTAEEAMSR_	2 Phospho (STY)	sp|P46379|BAG6_HUMAN	0.949		_AQT(ph)PPGPSLSGSK_	Phospho (STY)	sp|Q9UQ35|SRRM2_HUMAN	1		_ARHDS(ph)PDLAPNVTYSLPR_	Phospho (STY)	sp|Q9BRD0|BUD13_HUMAN	1		_ASS(ph)PFR_	Phospho (STY)	sp|Q14978|NOLC1_HUMAN	1		_DFQEYVEPGEDFPAS(ph)PQR_	Phospho (STY)	sp|Q9Y6G9|DC1L1_HUMAN	1		_ECINAAPDSPS(ph)K_	Phospho (STY)	sp|Q7Z569|BRAP_HUMAN	0.947		_EKTPS(ph)PKEEDEEPES(ph)PPEK_	2 Phospho (STY)	sp|Q9H1E3|NUCKS_HUMAN	0.999		_ENIKPNETS(ph)PSFSK_	Phospho (STY)	sp|Q99700|ATX2_HUMAN	0.854		_GGSGS(ph)GPTIEEVD_	Phospho (STY)	sp|P08107|HSP71_HUMAN	0.969
_APQTS(ph)S(ph)SPPPVR_	Phospho (STY)	sp|Q8IYB3|SRRM1_HUMAN	0.904		_AS(ph)PEPQRENASPAPGTTAEEAMSR_	Phospho (STY)	sp|P46379|BAG6_HUMAN	0.997		_AQT(ph)PPGPSLSGSKS(ph)PCPQEK_	2 Phospho (STY)	sp|Q9UQ35|SRRM2_HUMAN	1		_ARQEEGADAS(ph)EEDPTPAGEEDVK_	Phospho (STY)	sp|Q86X53|ERIC1_HUMAN	1		_ASS(ph)PPDRIDIFGR_	Phospho (STY)	sp|Q9NWB6|ARGL1_HUMAN	0.971		_DFQEYVEPGEDFPAS(ph)PQRR_	Phospho (STY)	sp|Q9Y6G9|DC1L1_HUMAN	1		_EDILENEDEQNS(ph)PPKK_	Phospho (STY)	sp|Q9NTI5|PDS5B_HUMAN	1		_ELSS(ph)PIS(ph)PK_	2 Phospho (STY)	sp|P78559|MAP1A_HUMAN	0.944		_ENSFGS(ph)PLEFR_	Phospho (STY)	sp|Q9UQ35|SRRM2_HUMAN	0.995		_GGSGSGPT(ph)IEEVD_	Phospho (STY)	sp|P08107|HSP71_HUMAN	0.801
_APQTS(ph)SSPPPVRR_	Phospho (STY)	sp|Q8IYB3|SRRM1_HUMAN	0.909		_AS(ph)PPPQGPLPGPPGALHR_	Phospho (STY)	sp|Q96G74|OTUD5_HUMAN	1		_AQTLPTSVVTITSESS(ph)PGKR_	Phospho (STY)	sp|Q01082|SPTB2_HUMAN	0.935		_ARS(ph)RT(ph)PPSAPSQSR_	Oxidation (M),Phospho (STY)	sp|Q9UQ35|SRRM2_HUMAN	1		_ASS(ph)PSPLTIGTPESQR_	Phospho (STY)	sp|Q9NPI6|DCP1A_HUMAN	0.909		_DGDKS(ph)PMSSLQISNEK_	Phospho (STY)	sp|Q9UER7|DAXX_HUMAN	0.996		_EDLPAENGETKTEESPAS(ph)DEAGEK_	Phospho (STY)	sp|P05114|HMGN1_HUMAN	0.999		_EM(ox)EHNTVCAAGTS(ph)PVGEIGEEK_	Oxidation (M),Phospho (STY)	sp|P18583|SON_HUMAN	0.953		_ENSGPVENGVS(ph)DQEGEEQAREPELPCGLAPAVSR_	Phospho (STY)	sp|Q8TEQ6|GEMI5_HUMAN	1		_GGSISVQVNSIKFDS(ph)E_	Phospho (STY)	sp|Q14978|NOLC1_HUMAN	1
_APQTSS(ph)S(ph)PPPVR_	Phospho (STY)	sp|Q8IYB3|SRRM1_HUMAN	0.853		_AS(ph)VSGPNS(ph)PSETRR_	2 Phospho (STY)	sp|O15344|TRI18_HUMAN	0.804		_AQTPPGPSLSGSKS(ph)PCPQEK_	Phospho (STY)	sp|Q9UQ35|SRRM2_HUMAN	0.959		_ARS(ph)VDALDDLTPPSTAESGSR_	Phospho (STY)	sp|Q86X29|LSR_HUMAN	0.994		_ASSGDQGS(ph)PPCFLR_	Phospho (STY)	sp|O75147|OBSL1_HUMAN	0.996		_DGELPVEDDIDLS(ph)DVELDDLGK_	Phospho (STY)	sp|Q15084|PDIA6_HUMAN	1		_EDLSPAFDHS(ph)PNK_	Phospho (STY)	sp|P17706|PTN2_HUMAN	1		_ENDLYVLPPLQEEEKHS(ph)S(ph)EEEDEK_	2 Phospho (STY)	sp|P28715|ERCC5_HUMAN	1		_ENVEYIEREES(ph)DGEYDEFGR_	Phospho (STY)	sp|O95218|ZRAB2_HUMAN	1		_GHYEVTGS(ph)DDETGK_	Phospho (STY)	sp|Q09666|AHNK_HUMAN	0.986
_APQTSSS(ph)PPPVR_	2 Phospho (STY)	sp|Q8IYB3|SRRM1_HUMAN	0.913		_AS(ph)WESLDEEWR_	2 Phospho (STY)	sp|Q00587|BORG5_HUMAN	0.999		_ARGDS(ph)EALDEES_	Phospho (STY)	sp|Q7Z4V5|HDGR2_HUMAN	1		_ARS(ph)VS(ph)PPPK_	Phospho (STY)	sp|Q13247|SRSF6_HUMAN	1		_ASSLSESS(ph)PPK_	Phospho (STY)	sp|Q9UHB6|LIMA1_HUMAN	0.965		_DGGS(ph)GNSTIIVSR_	Phospho (STY)	sp|Q7Z6Z7|HUWE1_HUMAN	1		_EDPQARPLEGSSSEDSPPEGQAPPSHS(ph)PR_	Phospho (STY)	sp|Q12789|TF3C1_HUMAN	0.98		_ENGIY(ph)S(ph)VT(ph)FT(ph)LLSGPSR_	4 Phospho (STY)	sp|Q8IWQ3|BRSK2_HUMAN	0.985		_ENVEYIEREES(ph)DGEYDEFGRK_	Phospho (STY)	sp|O95218|ZRAB2_HUMAN	1		_GKEELAEAEIIKDS(ph)PDSPEPPNK_	Phospho (STY)	sp|Q9NVM9|ASUN_HUMAN	0.955
_APQTSSS(ph)PPPVRR_	Phospho (STY)	sp|Q8IYB3|SRRM1_HUMAN	0.805		_ASAPERT(ph)PS(ph)PAPK_	2 Phospho (STY)	sp|Q63ZY6|NSN5C_HUMAN	1		_ARGPGGS(ph)PGGLQK_	Phospho (STY)	sp|Q96A00|PP14A_HUMAN	1		_ARSRT(ph)PPS(ph)APSQSR_	Phospho (STY)	sp|Q9UQ35|SRRM2_HUMAN	0.884		_ASSPS(ph)PLTIGTPESQR_	Phospho (STY)	sp|Q9NPI6|DCP1A_HUMAN	1		_DGLAPEKTS(ph)PDRDK_	Phospho (STY)	sp|Q7L4I2|RSRC2_HUMAN	0.954		_EDTDHEEKAS(ph)NEDVTK_	Phospho (STY)	sp|O75475|PSIP1_HUMAN	0.999		_ENPPVEDS(ph)S(ph)DEDDKRNQGNLYDK_	2 Phospho (STY)	sp|Q8TCJ2|STT3B_HUMAN	1		_EPAITS(ph)QNSPEAR_	Phospho (STY)	sp|P23193|TCEA1_HUMAN	0.959		_GKEELAEAEIIKDSPDS(ph)PEPPNK_	Phospho (STY)	sp|Q9NVM9|ASUN_HUMAN	0.918
_APS(ph)ASPLALHASR_	Phospho (STY)	sp|Q8N3F8|MILK1_HUMAN	0.942		_ASAPS(ph)PNAQVACDHCLK_	2 Phospho (STY)	sp|Q14258|TRI25_HUMAN	0.99		_ARHDS(ph)PDLAPNVTYSLPR_	Phospho (STY)	sp|Q9BRD0|BUD13_HUMAN	1		_AS(ph)DLEDEESAAR_	Phospho (STY)	sp|Q86VM9|ZCH18_HUMAN	1		_ASSSGPRS(ph)PLDQRS(ph)PYGSR_	2 Phospho (STY)	sp|O14646|CHD1_HUMAN	0.908		_DGLNQTTIPVS(ph)PPSTTKPSR_	Phospho (STY)	sp|Q71RC2|LARP4_HUMAN	0.998		_EDVEVAES(ph)PLR_	Phospho (STY)	sp|Q99567|NUP88_HUMAN	1		_ENSFGS(ph)PLEFR_	Phospho (STY)	sp|Q9UQ35|SRRM2_HUMAN	0.97		_EPAITSQNS(ph)PEAR_	Phospho (STY)	sp|P23193|TCEA1_HUMAN	0.86		_GKLS(ph)AEENPDDSEVPSSSGINSTK_	Phospho (STY)	sp|Q9Y5Q9|TF3C3_HUMAN	0.99
_APS(ph)DSSLGTPSDGRPELR_	Phospho (STY)	sp|Q15642|CIP4_HUMAN	1		_ASASRPQPAPADGADPPPAEEPEARPDGEGS(ph)PGK_	Phospho (STY)	sp|P11274|BCR_HUMAN	1		_ARPAPSRDPS(ph)PPR_	Phospho (STY)	sp|Q5C9Z4|NOM1_HUMAN	0.996		_AS(ph)LEDAPVDDLTR_	Oxidation (M),Phospho (STY)	sp|Q7Z2W4|ZCCHV_HUMAN	1		_ASSTST(ph)PEPTR_	Phospho (STY)	sp|Q8N8S7|ENAH_HUMAN	0.898		_DGLPRT(ph)PSRR_	Phospho (STY)	sp|Q9UQ35|SRRM2_HUMAN	0.999		_EEAS(ph)DDDM(ox)EGDEAVVR_	Oxidation (M),Phospho (STY)	sp|O75643|U520_HUMAN	1		_ENT(ph)EFSELELQEWY(ph)K_	2 Phospho (STY)	sp|P84074|HPCA_HUMAN	0.99		_EPHS(ph)PADQPEQQAESTLTSAETR_	Phospho (STY)	sp|Q9H2Y7|ZN106_HUMAN	1		_GKS(ph)PVPKS(ph)PVEEK_	2 Phospho (STY)	sp|P07197|NFM_HUMAN	1
_APS(ph)LTDLVK_	2 Phospho (STY)	sp|O15014|ZN609_HUMAN	0.946		_ASAVSELS(ph)PR_	Phospho (STY)	sp|Q9Y2W1|TR150_HUMAN	1		_ARPGSGASRGQGPGS(ph)R_	Phospho (STY)	sp|Q9H2J1|CI037_HUMAN	1		_AS(ph)PAPGSGHPEGPGAHLDM(ox)NSLDR_	Phospho (STY)	sp|O94826|TOM70_HUMAN	0.998		_ASSVSTKES(ph)PAR_	Phospho (STY)	sp|Q13428|TCOF_HUMAN	0.998		_DGPGLERS(ph)PGEPGGAAPER_	Phospho (STY)	sp|Q96EB6|SIR1_HUMAN	1		_EEATYGVWAERDS(ph)DDERPSFGGK_	Phospho (STY)	sp|Q9UBB9|TFP11_HUMAN	0.998		_ENTEFS(ph)ELELQEWY(ph)K_	2 Phospho (STY)	sp|P84074|HPCA_HUMAN	0.952		_EPVADEEEEDS(ph)DDDVEPITEFR_	Phospho (STY)	sp|P54105|ICLN_HUMAN	1		_GKS(ph)PVS(ph)KSPVEEK_	2 Phospho (STY)	sp|P07197|NFM_HUMAN	0.812
_APS(ph)PPLSQVFQTR_	Phospho (STY)	sp|Q9NRA8|4ET_HUMAN	1		_ASEGLDACASPT(ph)K_	2 Phospho (STY)	sp|Q92618|ZN516_HUMAN	0.917		_ARPSQFPEQSSSAQQNGSVSDIS(ph)PVQAAK_	Phospho (STY)	sp|O00139|KIF2A_HUMAN	0.974		_AS(ph)PAPGSGHPEGPGAHLDMNSLDR_	Phospho (STY)	sp|O94826|TOM70_HUMAN	0.998		_ASSVSTKES(ph)PARK_	Phospho (STY)	sp|Q13428|TCOF_HUMAN	0.993		_DGQDAIAQS(ph)PEK_	Phospho (STY)	sp|Q9NWH9|SLTM_HUMAN	1		_EEDCHS(ph)PTSKPPKPDQPLK_	Phospho (STY)	sp|P23588|IF4B_HUMAN	0.808		_ENVEYIEREES(ph)DGEYDEFGR_	Phospho (STY)	sp|O95218|ZRAB2_HUMAN	1		_EQDLPLAEAVRPKT(ph)PPVVIK_	Phospho (STY)	sp|Q96A49|SYAP1_HUMAN	1		_GKS(ph)PVSKS(ph)PVEEK_	2 Phospho (STY)	sp|P07197|NFM_HUMAN	0.998
_APS(ph)PPPTASNSSNSQSEK_	Phospho (STY)	sp|Q8N108|MIER1_HUMAN	1		_ASEIDQVVPAAQS(ph)SPINCEK_	Phospho (STY)	sp|O94782|UBP1_HUMAN	0.831		_ARQEEGADAS(ph)EEDPTPAGEEDVK_	Phospho (STY)	sp|Q86X53|ERIC1_HUMAN	1		_AS(ph)PPPQGPLPGPPGALHR_	Phospho (STY)	sp|Q96G74|OTUD5_HUMAN	1		_ASTAS(ph)PCNNNINAATAVALQEPR_	Phospho (STY)	sp|Q71RC2|LARP4_HUMAN	0.81		_DGQVINET(ph)SQHHDDLE_	Phospho (STY)	sp|P08670|VIME_HUMAN	0.806		_EEDCHSPTS(ph)KPPKPDQPLK_	Phospho (STY)	sp|P23588|IF4B_HUMAN	0.842		_ENVEYIEREES(ph)DGEYDEFGRK_	Phospho (STY)	sp|O95218|ZRAB2_HUMAN	1		_EQS(ph)EVSVSPR_	Phospho (STY)	sp|Q7L4I2|RSRC2_HUMAN	0.999		_GLAAEDS(ph)GGDSK_	Phospho (STY)	sp|P41227|NAA10_HUMAN	0.999
_APS(ph)SDEECFFDLLTK_	Phospho (STY)	sp|Q86YR5|GPSM1_HUMAN	0.861		_ASEIDQVVPAAQSS(ph)PINCEK_	Phospho (STY)	sp|O94782|UBP1_HUMAN	0.926		_ARS(ph)RT(ph)PPSAPSQSR_	2 Phospho (STY)	sp|Q9UQ35|SRRM2_HUMAN	1		_AS(ph)WESLDEEWR_	Phospho (STY)	sp|Q00587|BORG5_HUMAN	0.998		_ASVS(ph)GPNS(ph)PSETRR_	2 Phospho (STY)	sp|O15344|TRI18_HUMAN	0.995		_DGQVINETS(ph)QHHDDLE_	Phospho (STY)	sp|P08670|VIME_HUMAN	0.814		_EEDEEPES(ph)PPEK_	Phospho (STY)	sp|Q9H1E3|NUCKS_HUMAN	1		_EPAITSQNS(ph)PEAR_	Phospho (STY)	sp|P23193|TCEA1_HUMAN	0.945		_EQYVPPRS(ph)PK_	Phospho (STY)	sp|Q71RC2|LARP4_HUMAN	1		_GLAEVQQDGEAEEGATS(ph)DGEK_	Phospho (STY)	sp|Q02952|AKA12_HUMAN	0.995
_APSAS(ph)PLALHASR_	Phospho (STY)	sp|Q8N3F8|MILK1_HUMAN	0.956		_ASFDHS(ph)PDSLPLR_	Phospho (STY)	sp|Q8NB78|KDM1B_HUMAN	0.999		_ARS(ph)VDALDDLTPPSTAESGSR_	Phospho (STY)	sp|Q86X29|LSR_HUMAN	0.997		_ASAPS(ph)PNAQVACDHCLK_	Phospho (STY)	sp|Q14258|TRI25_HUMAN	1		_ASVSGPNS(ph)PSETRR_	Phospho (STY)	sp|O15344|TRI18_HUMAN	0.999		_DGSS(ph)PPLLEK_	Phospho (STY)	sp|Q6W2J9|BCOR_HUMAN	0.985		_EEDEEPES(ph)PPEKK_	Phospho (STY)	sp|Q9H1E3|NUCKS_HUMAN	1		_EPVADEEEEDS(ph)DDDVEPITEFR_	Phospho (STY)	sp|P54105|ICLN_HUMAN	1		_ERDKEVS(ph)DDEAEEK_	Phospho (STY)	sp|P07900|HS90A_HUMAN	1		_GLLYDS(ph)DEEDEERPAR_	Phospho (STY)	sp|P49736|MCM2_HUMAN	1
_APVPEPGLDLSLSPRPDS(ph)PQPR_	Oxidation (M),Phospho (STY)	sp|Q8TAP8|PPR35_HUMAN	0.997		_ASGDPGAS(ph)GMSPR_	2 Phospho (STY)	sp|Q8NDT2|RB15B_HUMAN	0.829		_ARS(ph)VS(ph)PPPK_	2 Phospho (STY)	sp|Q13247|SRSF6_HUMAN	1		_ASASRPQPAPADGADPPPAEEPEARPDGEGS(ph)PGK_	Phospho (STY)	sp|P11274|BCR_HUMAN	1		_ASVSQTS(ph)PQSASSPR_	Phospho (STY)	sp|Q8TDY2|RBCC1_HUMAN	0.895		_DGTAPPPQSPGSPGTGQDEEWS(ph)DEESPRK_	Phospho (STY)	sp|Q9UKS6|PACN3_HUMAN	0.998		_EEDEPEERS(ph)GDETPGSEVPGDK_	Phospho (STY)	sp|Q1KMD3|HNRL2_HUMAN	1		_EQS(ph)EVSVSPR_	Phospho (STY)	sp|Q7L4I2|RSRC2_HUMAN	0.997		_EREES(ph)EDELEEANGNNPIDIEVDQNK_	Phospho (STY)	sp|Q9UKL0|RCOR1_HUMAN	1		_GLLYDS(ph)DEEDEERPARK_	Phospho (STY)	sp|P49736|MCM2_HUMAN	0.999
_APVPSTCSSTFPEELS(ph)PPSHQAK_	Oxidation (M),Phospho (STY)	sp|Q14980|NUMA1_HUMAN	1		_ASGDPGASGMS(ph)PR_	Phospho (STY)	sp|Q8NDT2|RB15B_HUMAN	0.994		_ARSRT(ph)PPSAPSQS(ph)R_	2 Phospho (STY)	sp|Q9UQ35|SRRM2_HUMAN	0.964		_ASAVSELS(ph)PR_	Phospho (STY)	sp|Q9Y2W1|TR150_HUMAN	1		_ASVVDPSTESSPAPQEGSEQPASPAS(ph)PLSSR_	Phospho (STY)	sp|Q66K14|TBC9B_HUMAN	0.842		_DGVLTLANNVT(ph)PAK_	Phospho (STY)	sp|P27816|MAP4_HUMAN	1		_EEDGADAS(ph)EEDLTR_	Phospho (STY)	sp|Q86X53|ERIC1_HUMAN	0.811		_EQSEVS(ph)VS(ph)PR_	2 Phospho (STY)	sp|Q7L4I2|RSRC2_HUMAN	0.84		_ERPISLGIFPLPAGDGLLT(ph)PDAQK_	Phospho (STY)	sp|O60271|JIP4_HUMAN	1		_GLVAAYSGES(ph)DS(ph)EEEQER_	2 Phospho (STY)	sp|P98175|RBM10_HUMAN	1
_APVQPQQS(ph)PAAAPGGTDEKPSGK_	Phospho (STY)	sp|Q13200|PSMD2_HUMAN	1		_ASGQAFELILS(ph)PR_	Phospho (STY)	sp|P16949|STMN1_HUMAN	1		_ARST(ph)PS(ph)PVLQPR_	2 Phospho (STY)	sp|Q8TEK3|DOT1L_HUMAN	0.924		_ASEENLLSSSSVPS(ph)ADRDSSPTTNSK_	Phospho (STY)	sp|Q9NRA8|4ET_HUMAN	0.986		_AT(ph)NESEDEIPQLVPIGK_	Phospho (STY)	sp|O76021|RL1D1_HUMAN	0.937		_DHFGLEGDEESTM(ox)LEDSVS(ph)PKK_	Oxidation (M),Phospho (STY)	sp|Q9Y490|TLN1_HUMAN	0.956		_EEEDKDDEEKPKIEDVGS(ph)DEEDDSGK_	Phospho (STY)	sp|P08238|HS90B_HUMAN	1		_EQSEVSVS(ph)PR_	Phospho (STY)	sp|Q7L4I2|RSRC2_HUMAN	0.826		_ERS(ph)PALKS(ph)PLQSVVVR_	2 Phospho (STY)	sp|Q9Y2W1|TR150_HUMAN	0.983		_GLVAAYSGES(ph)DS(ph)EEEQERGGPER_	2 Phospho (STY)	sp|P98175|RBM10_HUMAN	0.879
_APVSGS(ph)RS(ph)PDREASGSGGR_	Phospho (STY)	sp|Q8N5F7|NKAP_HUMAN	0.935		_ASIGQS(ph)PGLPSTTFK_	Phospho (STY)	sp|Q5VT52|RPRD2_HUMAN	0.998		_ART(ph)GLS(ph)GPRSSPSR_	2 Phospho (STY)	sp|Q2TAZ0|ATG2A_HUMAN	0.963		_ASEGLDACASPT(ph)K_	Phospho (STY)	sp|Q92618|ZN516_HUMAN	0.977		_ATAEQIS(ph)S(ph)QT(ph)GNK_	3 Phospho (STY)	sp|Q16698|DECR_HUMAN	1		_DHS(ph)PT(ph)PSVFNSDEER_	2 Phospho (STY)	sp|Q6UN15|FIP1_HUMAN	0.897		_EEEPEAEEEEVAAKKS(ph)PVK_	Phospho (STY)	sp|P07197|NFM_HUMAN	1		_EQSSDLTPS(ph)GDVS(ph)PVKPLSR_	2 Phospho (STY)	sp|Q8WYQ5|DGCR8_HUMAN	0.841		_ES(ph)SPPREEAPPPPPPTEDSCAK_	Phospho (STY)	sp|Q9UPW6|SATB2_HUMAN	0.839		_GLVAAYSGES(ph)DS(ph)EEEQERGGPEREEK_	2 Phospho (STY)	sp|P98175|RBM10_HUMAN	0.998
_APVSSTESVIQSNT(ph)PT(ph)PPPSQPLNETAEEESR_	Oxidation (M),Phospho (STY)	sp|Q9HC35|EMAL4_HUMAN	0.832		_ASM(ox)SEFLES(ph)EDGEVEQQR_	Phospho (STY)	sp|Q15022|SUZ12_HUMAN	1		_AS(ph)DLEDEESAAR_	Phospho (STY)	sp|Q86VM9|ZCH18_HUMAN	1		_ASES(ph)SSEEKDDYEIFVK_	Phospho (STY)	sp|P18583|SON_HUMAN	0.862		_ATAPQTQHVS(ph)PM(ox)R_	Oxidation (M),Phospho (STY)	sp|P29692|EF1D_HUMAN	1		_DHS(ph)PTPSVFNS(ph)DEERYR_	2 Phospho (STY)	sp|Q6UN15|FIP1_HUMAN	0.986		_EEETS(ph)IDVAGKPNEVTK_	Phospho (STY)	sp|P53985|MOT1_HUMAN	0.814		_ERDHS(ph)PT(ph)PSVFNSDEER_	2 Phospho (STY)	sp|Q6UN15|FIP1_HUMAN	0.948		_ESDQTLAALLS(ph)PK_	Phospho (STY)	sp|P18583|SON_HUMAN	1		_GM(ox)KDDKEEEEDGTGS(ph)PQLNNR_	Oxidation (M),Phospho (STY)	sp|P49407|ARRB1_HUMAN	0.929
_AQAVS(ph)EEEEEEEGK_	Phospho (STY)	sp|Q9GZR7|DDX24_HUMAN	1		_ASPS(ph)CSSPTRDSSGVPVSK_	Phospho (STY)	sp|Q8N5I9|CL045_HUMAN	0.889		_AS(ph)DPGLPAEEPK_	Phospho (STY)	sp|P27708|PYR1_HUMAN	1		_ASGDPGASGMS(ph)PR_	Phospho (STY)	sp|Q8NDT2|RB15B_HUMAN	0.992		_ATAPQTQHVS(ph)PMR_	Phospho (STY)	sp|P29692|EF1D_HUMAN	1		_DHS(ph)PTPSVFNSDEER_	Phospho (STY)	sp|Q6UN15|FIP1_HUMAN	1		_EEHGGLIRS(ph)PR_	Phospho (STY)	sp|P26368|U2AF2_HUMAN	1		_ERDHS(ph)PTPSVFNS(ph)DEER_	2 Phospho (STY)	sp|Q6UN15|FIP1_HUMAN	0.985		_ESEDKPEIEDVGS(ph)DEEEEK_	Phospho (STY)	sp|P07900|HS90A_HUMAN	1		_GNAEGS(ph)S(ph)DEEGKLVIDEPAK_	2 Phospho (STY)	sp|P51858|HDGF_HUMAN	1
_AQDGENEKNS(ph)EKEQDSEVSEDTK_	Phospho (STY)	sp|Q92922|SMRC1_HUMAN	1		_ASPS(ph)PQPSSQPLQIHR_	2 Phospho (STY)	sp|Q9HC35|EMAL4_HUMAN	0.909		_AS(ph)LEDAPVDDLTR_	Phospho (STY)	sp|Q7Z2W4|ZCCHV_HUMAN	1		_ASGQAFELILS(ph)PR_	Phospho (STY)	sp|P16949|STMN1_HUMAN	1		_ATDGDLAQEPGPGLTFEDS(ph)GNPKSPDK_	Phospho (STY)	sp|O15417|TNC18_HUMAN	0.802		_DHS(ph)PTPSVFNSDEERYR_	Phospho (STY)	sp|Q6UN15|FIP1_HUMAN	0.981		_EELM(ox)SS(ph)DLEETAGSTSIPK_	Oxidation (M),Phospho (STY)	sp|O00567|NOP56_HUMAN	0.803		_ERDHS(ph)PTPSVFNS(ph)DEERYR_	2 Phospho (STY)	sp|Q6UN15|FIP1_HUMAN	0.84		_ESEDKPEIEDVGS(ph)DEEEEKK_	Phospho (STY)	sp|P07900|HS90A_HUMAN	1		_GNDPLTS(ph)S(ph)PGR_	2 Phospho (STY)	sp|P49736|MCM2_HUMAN	0.996
_AQGEPVAGHES(ph)PKIPYEK_	Phospho (STY)	sp|O94979|SC31A_HUMAN	1		_ASPSCSS(ph)PTRDSSGVPVSK_	Phospho (STY)	sp|Q8N5I9|CL045_HUMAN	0.877		_AS(ph)PAPGSGHPEGPGAHLDM(ox)NSLDR_	Oxidation (M),Phospho (STY)	sp|O94826|TOM70_HUMAN	0.979		_ASIGQS(ph)PGLPSTTFK_	2 Phospho (STY)	sp|Q5VT52|RPRD2_HUMAN	1		_ATDSDLSS(ph)PR_	Phospho (STY)	sp|Q9BRD0|BUD13_HUMAN	0.99		_DHSPT(ph)PSVFNSDEER_	Phospho (STY)	sp|Q6UN15|FIP1_HUMAN	0.947		_EENPES(ph)DGEPVVEDGTSVK_	Phospho (STY)	sp|Q13439|GOGA4_HUMAN	1		_ERDKEVS(ph)DDEAEEK_	Phospho (STY)	sp|P07900|HS90A_HUMAN	1		_ESEDKPEIEDVGS(ph)DEEEEKKDGDK_	Phospho (STY)	sp|P07900|HS90A_HUMAN	1		_GNDPLTSS(ph)PGR_	Phospho (STY)	sp|P49736|MCM2_HUMAN	0.995
_AQGVRS(ph)PLLR_	Oxidation (M),Phospho (STY)	sp|O60343|TBCD4_HUMAN	1		_ASPVTSPAAAFPTAS(ph)PANK_	Phospho (STY)	sp|Q9UIF9|BAZ2A_HUMAN	0.832		_AS(ph)PAPGSGHPEGPGAHLDMNSLDR_	Phospho (STY)	sp|O94826|TOM70_HUMAN	0.992		_ASLGS(ph)LEGEAEAEASSPK_	Phospho (STY)	sp|Q09666|AHNK_HUMAN	0.997		_ATEDGEEDEVS(ph)AGEK_	Phospho (STY)	sp|Q9BXW9|FACD2_HUMAN	1		_DIEVLS(ph)EDT(ph)DYEEDEVTK_	2 Phospho (STY)	sp|Q4LE39|ARI4B_HUMAN	0.929		_EEPLS(ph)EEEPCTSTAIAS(ph)PEK_	2 Phospho (STY)	sp|Q9Y2X3|NOP58_HUMAN	1		_ERECS(ph)PSS(ph)PLPPLPEDEEGSEVTNSK_	2 Phospho (STY)	sp|Q96GY3|LIN37_HUMAN	0.849		_ESEDSETQPFDTHLEAYGPCLS(ph)PPR_	Phospho (STY)	sp|Q14676|MDC1_HUMAN	0.988		_GNDS(ph)DGEGESDDPEKK_	Phospho (STY)	sp|O75351|VPS4B_HUMAN	1
_AQLGINEDHS(ph)EGDEK_	Phospho (STY)	sp|Q69YQ0|CYTSA_HUMAN	1		_ASS(ph)FSGISILTR_	Phospho (STY)	sp|Q9Y2K5|R3HD2_HUMAN	0.902		_AS(ph)PDQNASTHTPQSSVK_	Phospho (STY)	sp|Q14677|EPN4_HUMAN	0.999		_ASLVALPEQTAS(ph)EEETPPPLLTK_	Phospho (STY)	sp|Q9UKV3|ACINU_HUMAN	0.964		_ATEETGQAQSGQANCQGLS(ph)PVSVASK_	Phospho (STY)	sp|Q9UHF7|TRPS1_HUMAN	0.958		_DIIRQPS(ph)EEEIIK_	Phospho (STY)	sp|Q15121|PEA15_HUMAN	1		_EEPLS(ph)EEEPCTSTAIAS(ph)PEKK_	2 Phospho (STY)	sp|Q9Y2X3|NOP58_HUMAN	0.973		_EREDS(ph)GDAEAHAFKS(ph)PSK_	2 Phospho (STY)	sp|Q9NPI1|BRD7_HUMAN	0.991		_ESEEGNPVRGS(ph)EEDSPKK_	Phospho (STY)	sp|O43719|HTSF1_HUMAN	0.864		_GNEPGSDRS(ph)PS(ph)PSK_	2 Phospho (STY)	sp|Q5VT52|RPRD2_HUMAN	0.97
_AQLS(ph)PGIYDDTSAR_	Phospho (STY)	sp|O75376|NCOR1_HUMAN	1		_ASS(ph)LEDLVLK_	Phospho (STY)	sp|Q15477|SKIV2_HUMAN	0.98		_AS(ph)PEPQRENASPAPGTTAEEAM(ox)SR_	Oxidation (M),Phospho (STY)	sp|P46379|BAG6_HUMAN	0.999		_ASM(ox)SEFLES(ph)EDGEVEQQR_	Oxidation (M),Phospho (STY)	sp|Q15022|SUZ12_HUMAN	1		_ATGDGS(ph)S(ph)PELPSLER_	2 Phospho (STY)	sp|Q9H2Y7|ZN106_HUMAN	0.974		_DIKEES(ph)DEEEEDDEESGRLR_	Phospho (STY)	sp|Q96EV2|RBM33_HUMAN	1		_EEPVS(ph)S(ph)GPEEAVGK_	2 Phospho (STY)	sp|O00567|NOP56_HUMAN	1		_ERFS(ph)PPRHELS(ph)PPQK_	2 Phospho (STY)	sp|Q9BXP5|SRRT_HUMAN	1		_ESEEGNPVRGSEEDS(ph)PKK_	Phospho (STY)	sp|O43719|HTSF1_HUMAN	1		_GNIETTS(ph)EDGQVFS(ph)PKK_	2 Phospho (STY)	sp|Q5T200|ZC3HD_HUMAN	0.943
_AQQQEEQGS(ph)VNDVKEEEK_	Phospho (STY)	sp|Q9Y4W2|LAS1L_HUMAN	1		_ASS(ph)LGEIDESSELR_	Phospho (STY)	sp|Q16513|PKN2_HUMAN	0.931		_AS(ph)PLPPPPPPPGAEPACPGSSAAAPEYK_	Phospho (STY)	sp|Q8NDT2|RB15B_HUMAN	1		_ASPEPQRENAS(ph)PAPGTTAEEAM(ox)SR_	Phospho (STY)	sp|P46379|BAG6_HUMAN	0.992		_ATGGLCLLGAYADS(ph)DDDDNDVSEK_	Phospho (STY)	sp|Q8N3X1|FNBP4_HUMAN	1		_DIPRT(ph)PSR_	Phospho (STY)	sp|Q9UQ35|SRRM2_HUMAN	0.996		_EEPVS(ph)SGPEEAVGK_	Phospho (STY)	sp|O00567|NOP56_HUMAN	0.924		_ERRT(ph)PS(ph)DDEEDNLFAPPK_	2 Phospho (STY)	sp|Q9Y4E1|FA21C_HUMAN	1		_ESKEEETS(ph)IDVAGKPNEVTK_	Phospho (STY)	sp|P53985|MOT1_HUMAN	0.921		_GNVFSS(ph)PTAAGT(ph)PNK_	2 Phospho (STY)	sp|Q05682|CALD1_HUMAN	0.928
_AQQQEEQGS(ph)VNDVKEEEKEEK_	Phospho (STY)	sp|Q9Y4W2|LAS1L_HUMAN	1		_ASS(ph)LNFLNK_	Phospho (STY)	sp|Q9H0B6|KLC2_HUMAN	0.986		_AS(ph)PPGDLQNPK_	Phospho (STY)	sp|O00273|DFFA_HUMAN	1		_ASPS(ph)CSSPTRDSSGVPVSK_	Phospho (STY)	sp|Q8N5I9|CL045_HUMAN	0.89		_ATIS(ph)DEEIER_	Phospho (STY)	sp|Q9UQN3|CHM2B_HUMAN	1		_DIS(ph)PEKSELDLGEPGPPGVEPPPQLLDIQCK_	Phospho (STY)	sp|Q5VUA4|ZN318_HUMAN	0.98		_EEPVSS(ph)GPEEAVGK_	Phospho (STY)	sp|O00567|NOP56_HUMAN	0.841		_ERS(ph)LS(ph)RER_	2 Phospho (STY)	sp|P84103|SRSF3_HUMAN	1		_ESPRPLQLPGAEGPAIS(ph)DGEEGGGEPGAGGGAAGAAGAGR_	Phospho (STY)	sp|Q6PKG0|LARP1_HUMAN	1		_GPAS(ph)DS(ph)ETEDASR_	2 Phospho (STY)	sp|Q96ST2|IWS1_HUMAN	0.967
_AQS(ph)PGAVEEILDRENK_	Oxidation (M),Phospho (STY)	sp|Q9NYM9|BET1L_HUMAN	1		_ASS(ph)PFR_	Phospho (STY)	sp|Q14978|NOLC1_HUMAN	1		_AS(ph)PPPQGPLPGPPGALHR_	Phospho (STY)	sp|Q96G74|OTUD5_HUMAN	1		_ASPVTSPAAAFPTAS(ph)PANK_	Phospho (STY)	sp|Q9UIF9|BAZ2A_HUMAN	0.824		_ATNES(ph)EDEIPQLVPIGK_	Phospho (STY)	sp|O76021|RL1D1_HUMAN	0.999		_DITDPLSLNTCTDEGHVVLAS(ph)PLK_	Phospho (STY)	sp|Q7L2J0|MEPCE_HUMAN	0.993		_EES(ph)DGEYDEFGRK_	Phospho (STY)	sp|O95218|ZRAB2_HUMAN	1		_ERS(ph)PALKS(ph)PLQSVVVR_	2 Phospho (STY)	sp|Q9Y2W1|TR150_HUMAN	1		_ESRQES(ph)DPEDDDVK_	Phospho (STY)	sp|Q9H307|PININ_HUMAN	1		_GPAS(ph)DSET(ph)EDASR_	2 Phospho (STY)	sp|Q96ST2|IWS1_HUMAN	0.972
_AQS(ph)RS(ph)RECDITK_	Phospho (STY)	sp|Q13427|PPIG_HUMAN	1		_ASS(ph)PPDRIDIFGR_	Phospho (STY)	sp|Q9NWB6|ARGL1_HUMAN	0.974		_AS(ph)QQPKRVSQEPM(ox)R_	Oxidation (M),Phospho (STY)	sp|Q8N5Q1|F71E2_HUMAN	0.981		_ASS(ph)FSGISVLTR_	Phospho (STY)	sp|Q15032|R3HD1_HUMAN	0.933		_ATS(ph)SSSGSLSATGR_	Phospho (STY)	sp|Q03252|LMNB2_HUMAN	0.827		_DKDDQEWESPS(ph)PPKPTVFISGVIAR_	Phospho (STY)	sp|P51397|DAP1_HUMAN	0.989		_EES(ph)EES(ph)EAEPVQR_	2 Phospho (STY)	sp|Q9BW71|HIRP3_HUMAN	1		_ERS(ph)PS(ph)PLRGNVVPS(ph)PLPTR_	3 Phospho (STY)	sp|Q9Y2V2|CHSP1_HUMAN	1		_ESS(ph)PEKEAEEGCPEK_	Phospho (STY)	sp|O43719|HTSF1_HUMAN	0.912		_GPGAPGLAHLQESQAGS(ph)DTDVEEGK_	Phospho (STY)	sp|Q14676|MDC1_HUMAN	0.918
_AQS(ph)TDSLGTSGSLQSK_	2 Phospho (STY)	sp|Q15276|RABE1_HUMAN	0.91		_ASS(ph)PSPLTIGTPESQR_	Oxidation (M),Phospho (STY)	sp|Q9NPI6|DCP1A_HUMAN	0.886		_AS(ph)WESLDEEWR_	Phospho (STY)	sp|Q00587|BORG5_HUMAN	0.999		_ASS(ph)LEDLVLK_	Phospho (STY)	sp|Q15477|SKIV2_HUMAN	0.957		_ATSSS(ph)NPSS(ph)PAPDWYK_	2 Phospho (STY)	sp|P46100|ATRX_HUMAN	0.91		_DKEIS(ph)PSVTK_	Phospho (STY)	sp|Q8N488|RYBP_HUMAN	0.828		_EETNGPSNQKPVKS(ph)PDNSIK_	Phospho (STY)	sp|Q9UKL0|RCOR1_HUMAN	0.998		_ERS(ph)PS(ph)PLRGNVVPSPLPTR_	2 Phospho (STY)	sp|Q9Y2V2|CHSP1_HUMAN	1		_ESSIIAPAPAEDVDT(ph)PPR_	Phospho (STY)	sp|Q15910|EZH2_HUMAN	1		_GPKPEPPGS(ph)GS(ph)PAPPR_	2 Phospho (STY)	sp|Q9UKJ3|GPTC8_HUMAN	1
_AQT(ph)PPGPSLSGSK_	Phospho (STY)	sp|Q9UQ35|SRRM2_HUMAN	1		_ASSGDQGS(ph)PPCFLR_	Phospho (STY)	sp|O75147|OBSL1_HUMAN	1		_ASAPS(ph)PNAQVACDHCLK_	Phospho (STY)	sp|Q14258|TRI25_HUMAN	0.902		_ASS(ph)PELPVSVENIK_	Phospho (STY)	sp|Q969R5|LMBL2_HUMAN	0.951		_ATVT(ph)PS(ph)PVK_	2 Phospho (STY)	sp|Q9H1E3|NUCKS_HUMAN	1		_DKEVS(ph)DDEAEEK_	Phospho (STY)	sp|P07900|HS90A_HUMAN	1		_EFITGDVEPTDAESEWHS(ph)ENEEEEK_	Phospho (STY)	sp|Q99733|NP1L4_HUMAN	0.991		_ERS(ph)PS(ph)PPTIQSK_	2 Phospho (STY)	sp|Q14687|GSE1_HUMAN	0.974		_ESSIIAPAPAEDVDT(ph)PPRK_	Phospho (STY)	sp|Q15910|EZH2_HUMAN	1		_GPPDFS(ph)S(ph)DEEREPT(ph)PVLGSGAAAAGR_	3 Phospho (STY)	sp|P42167|LAP2B_HUMAN	0.998
_AQT(ph)PPGPSLSGSKS(ph)PCPQEK_	Oxidation (M),Phospho (STY)	sp|Q9UQ35|SRRM2_HUMAN	0.999		_ASSLSESS(ph)PPK_	Phospho (STY)	sp|Q9UHB6|LIMA1_HUMAN	0.853		_ASASRPQPAPADGADPPPAEEPEARPDGEGS(ph)PGK_	Phospho (STY)	sp|P11274|BCR_HUMAN	1		_ASS(ph)PFR_	Phospho (STY)	sp|Q14978|NOLC1_HUMAN	1		_ATVTPS(ph)PVK_	Phospho (STY)	sp|Q9H1E3|NUCKS_HUMAN	1		_DKFS(ph)PFPVQDRPESSLVFK_	Phospho (STY)	sp|Q9UQ35|SRRM2_HUMAN	1		_EGDVLRRS(ph)EEHS(ph)PPR_	2 Phospho (STY)	sp|Q8IXT5|RB12B_HUMAN	1		_ERVPDS(ph)PS(ph)PAPS(ph)LEEGR_	3 Phospho (STY)	sp|Q9UI36|DACH1_HUMAN	1		_ESVPEFPLS(ph)PPK_	Phospho (STY)	sp|P16949|STMN1_HUMAN	1		_GPPDFS(ph)S(ph)DEEREPTPVLGSGAAAAGR_	2 Phospho (STY)	sp|P42167|LAP2B_HUMAN	1
_AQT(ph)PPGPSLSGSKSPCPQEK_	Oxidation (M),Phospho (STY)	sp|Q9UQ35|SRRM2_HUMAN	0.998		_ASSPS(ph)PLTIGTPESQR_	Phospho (STY)	sp|Q9NPI6|DCP1A_HUMAN	0.996		_ASAVSELS(ph)PR_	Phospho (STY)	sp|Q9Y2W1|TR150_HUMAN	1		_ASS(ph)PPDRIDIFGR_	Phospho (STY)	sp|Q9NWB6|ARGL1_HUMAN	0.99		_AVAS(ph)PEATVSQTDENK_	Phospho (STY)	sp|Q641Q2|FA21A_HUMAN	1		_DKS(ph)PVREPIDNLTPEER_	Phospho (STY)	sp|Q14498|RBM39_HUMAN	1		_EGEEPTVYS(ph)DEEEPK_	Phospho (STY)	sp|O00264|PGRC1_HUMAN	1		_ERVPDSPS(ph)PAPS(ph)LEEGR_	2 Phospho (STY)	sp|Q9UI36|DACH1_HUMAN	0.991		_ESYTEEIVS(ph)EAESHVSGISR_	Phospho (STY)	sp|Q5QJE6|TDIF2_HUMAN	0.909		_GPPS(ph)PPAPVM(ox)HS(ph)PSR_	Oxidation (M),2 Phospho (STY)	sp|Q13573|SNW1_HUMAN	0.993
_AQTLPTSVVTITSESS(ph)PGKR_	Phospho (STY)	sp|Q01082|SPTB2_HUMAN	0.987		_ASSSGPRS(ph)PLDQR_	Phospho (STY)	sp|O14646|CHD1_HUMAN	1		_ASEGLDACASPT(ph)K_	Phospho (STY)	sp|Q92618|ZN516_HUMAN	0.996		_ASS(ph)PSPLTIGTPESQR_	Phospho (STY)	sp|Q9NPI6|DCP1A_HUMAN	0.92		_AVEES(ph)S(ph)DEERQR_	2 Phospho (STY)	sp|Q9BW71|HIRP3_HUMAN	1		_DKSKVS(ph)TSGSSVDSSK_	Phospho (STY)	sp|Q15648|MED1_HUMAN	0.849		_EGEEPTVYS(ph)DEEEPKDESAR_	Phospho (STY)	sp|O00264|PGRC1_HUMAN	0.996		_ES(ph)PRPLQLPGAEGPAIS(ph)DGEEGGGEPGAGGGAAGAAGAGR_	2 Phospho (STY)	sp|Q6PKG0|LARP1_HUMAN	1		_ET(ph)DIPQLS(ph)QASR_	2 Phospho (STY)	sp|Q8IX15|HOMEZ_HUMAN	1		_GPS(ph)PSPVGS(ph)PASVAQSR_	2 Phospho (STY)	sp|O14497|ARI1A_HUMAN	0.926
_AQTPPGPSLSGSKS(ph)PCPQEK_	Phospho (STY)	sp|Q9UQ35|SRRM2_HUMAN	0.948		_ASSVSTKES(ph)PAR_	Oxidation (M),Phospho (STY)	sp|Q13428|TCOF_HUMAN	0.99		_ASEIDQVVPAAQS(ph)SPINCEK_	Phospho (STY)	sp|O94782|UBP1_HUMAN	0.838		_ASSLSESS(ph)PPK_	Oxidation (M),Phospho (STY)	sp|Q9UHB6|LIMA1_HUMAN	0.816		_AVLSDS(ph)PQLSEGK_	Phospho (STY)	sp|Q7Z4H7|HAUS6_HUMAN	0.999		_DLDEDELLGNLS(ph)ETELK_	Phospho (STY)	sp|Q9NYL9|TMOD3_HUMAN	0.988		_EGEEPTVYS(ph)DEEEPKDESARK_	Phospho (STY)	sp|O00264|PGRC1_HUMAN	0.966		_ES(ph)RQESDPEDDDVK_	Phospho (STY)	sp|Q9H307|PININ_HUMAN	0.834		_ETAVPGPLGIEDISPNLS(ph)PDDK_	Phospho (STY)	sp|Q12888|TP53B_HUMAN	1		_GPS(ph)PSS(ph)PTPPAAAAPAEQAPR_	2 Phospho (STY)	sp|Q86VQ1|GLCI1_HUMAN	0.906
_ARGDS(ph)EALDEES_	Phospho (STY)	sp|Q7Z4V5|HDGR2_HUMAN	1		_ASSVSTKES(ph)PARK_	Phospho (STY)	sp|Q13428|TCOF_HUMAN	1		_ASEPLLS(ph)PPPFGESR_	Phospho (STY)	sp|O14686|KMT2D_HUMAN	1		_ASSPS(ph)PLTIGTPESQR_	Phospho (STY)	sp|Q9NPI6|DCP1A_HUMAN	0.992		_AVMLLHT(ph)HTIT(ph)SR_	2 Phospho (STY)	sp|Q92616|GCN1L_HUMAN	0.852		_DLDEEGS(ph)EK_	Phospho (STY)	sp|O43719|HTSF1_HUMAN	1		_EGETQGVAFEHESPADFQNSQS(ph)PVQDQDK_	Phospho (STY)	sp|P78332|RBM6_HUMAN	0.971		_ESAAPAS(ph)PAPS(ph)PAPS(ph)PTPAPPQK_	3 Phospho (STY)	sp|Q3KQU3|MA7D1_HUMAN	0.972		_ETVSEAPPLLFS(ph)DEEEK_	Phospho (STY)	sp|Q641Q2|FA21A_HUMAN	1		_GPSQEEEDNHS(ph)DEEDRASEPK_	Phospho (STY)	sp|Q86VM9|ZCH18_HUMAN	1
_ARHDS(ph)PDLAPNVTYSLPR_	Phospho (STY)	sp|Q9BRD0|BUD13_HUMAN	1		_ASVS(ph)GPNS(ph)PSETRR_	Phospho (STY)	sp|O15344|TRI18_HUMAN	0.884		_ASEPLLSPPPFGES(ph)R_	Phospho (STY)	sp|O14686|KMT2D_HUMAN	0.971		_ASSSGPRS(ph)PLDQR_	Phospho (STY)	sp|O14646|CHD1_HUMAN	0.995		_AVPIAVADEGES(ph)ES(ph)EDDDLKPR_	2 Phospho (STY)	sp|Q9Y2K6|UBP20_HUMAN	1		_DLDRPESQS(ph)PK_	Phospho (STY)	sp|Q8WUA4|TF3C2_HUMAN	0.999		_EGGSKS(ph)DSEDITR_	Phospho (STY)	sp|O00470|MEIS1_HUMAN	0.999		_ESAAPAS(ph)PAPS(ph)PAPSPT(ph)PAPPQK_	3 Phospho (STY)	sp|Q3KQU3|MA7D1_HUMAN	0.909		_EVDEDS(ph)EPEREVR_	Phospho (STY)	sp|Q53GS9|SNUT2_HUMAN	1		_GPTTGEGALDLSDVHS(ph)PPKS(ph)PEGK_	2 Phospho (STY)	sp|O95684|FR1OP_HUMAN	0.999
_ARPGSGASRGQGPGS(ph)R_	Phospho (STY)	sp|Q9H2J1|CI037_HUMAN	1		_ASVSGPNS(ph)PSETRR_	Phospho (STY)	sp|O15344|TRI18_HUMAN	0.998		_ASGDPGASGM(ox)S(ph)PR_	Oxidation (M),Phospho (STY)	sp|Q8NDT2|RB15B_HUMAN	0.987		_ASSVSTKES(ph)PAR_	Phospho (STY)	sp|Q13428|TCOF_HUMAN	0.991		_AVPIAVADEGES(ph)ESEDDDLKPR_	Phospho (STY)	sp|Q9Y2K6|UBP20_HUMAN	0.988		_DLEPGEVPS(ph)DSDEDGEHK_	Phospho (STY)	sp|Q96T58|MINT_HUMAN	0.819		_EGKPEIEGKPES(ph)EGEPGSETR_	Phospho (STY)	sp|Q96EI5|TCAL4_HUMAN	0.999		_ESDQTLAALLS(ph)PK_	Phospho (STY)	sp|P18583|SON_HUMAN	0.998		_EVDGLLTSEPM(ox)GS(ph)PVSSK_	Oxidation (M),Phospho (STY)	sp|Q8WWM7|ATX2L_HUMAN	1		_GRDS(ph)PYQSR_	Phospho (STY)	sp|Q13242|SRSF9_HUMAN	1
_ARPS(ph)PGHCLPEDEDPEER_	Phospho (STY)	sp|Q9BWH6|RPAP1_HUMAN	1		_ASVVDPSTESSPAPQEGSEQPASPAS(ph)PLSSR_	Oxidation (M),Phospho (STY)	sp|Q66K14|TBC9B_HUMAN	0.844		_ASGDPGASGMS(ph)PR_	Phospho (STY)	sp|Q8NDT2|RB15B_HUMAN	0.998		_ASTAS(ph)PCNNNINAATAVALQEPR_	Oxidation (M),2 Phospho (STY)	sp|Q71RC2|LARP4_HUMAN	0.866		_AVQQHQHGYDS(ph)DEEVDSELGTWEHQLR_	Phospho (STY)	sp|Q8IWZ8|SUGP1_HUMAN	0.981		_DLEPGEVPSDS(ph)DEDGEHK_	Phospho (STY)	sp|Q96T58|MINT_HUMAN	0.988		_EGNTTEDDFPSS(ph)PGNGNK_	Phospho (STY)	sp|Q15007|FL2D_HUMAN	0.984		_ESEDKPEIEDVGS(ph)DEEEEK_	Phospho (STY)	sp|P07900|HS90A_HUMAN	1		_EVDGLLTSEPMGS(ph)PVSSK_	Phospho (STY)	sp|Q8WWM7|ATX2L_HUMAN	1		_GRECS(ph)PTSS(ph)LER_	2 Phospho (STY)	sp|Q9P1Y6|PHRF1_HUMAN	0.871
_ARQEEGADAS(ph)EEDPTPAGEEDVK_	Phospho (STY)	sp|Q86X53|ERIC1_HUMAN	1		_ATAPQTQHVS(ph)PM(ox)R_	Phospho (STY)	sp|P29692|EF1D_HUMAN	1		_ASGQAFELILS(ph)PR_	Phospho (STY)	sp|P16949|STMN1_HUMAN	1		_ASTSDYQVISDRQT(ph)PK_	Phospho (STY)	sp|Q8NFH5|NUP53_HUMAN	1		_AVSETPAVPPVS(ph)EDEDDDDDDATPPPVIAPRPEHTK_	Phospho (STY)	sp|Q13153|PAK1_HUMAN	1		_DLESCS(ph)DDDNQGSK_	Phospho (STY)	sp|Q5T3I0|GPTC4_HUMAN	1		_EGPDLDRPGS(ph)DRQER_	Phospho (STY)	sp|Q7Z4V5|HDGR2_HUMAN	1		_ESEDKPEIEDVGS(ph)DEEEEKK_	Phospho (STY)	sp|P07900|HS90A_HUMAN	1		_EVQAEQPSSSS(ph)PR_	Phospho (STY)	sp|Q9Y388|RBMX2_HUMAN	0.994		_GRSECDS(ph)S(ph)PEPK_	2 Phospho (STY)	sp|Q9UQ35|SRRM2_HUMAN	1
_ARS(ph)RT(ph)PPSAPSQSR_	Phospho (STY)	sp|Q9UQ35|SRRM2_HUMAN	1		_ATAPQTQHVS(ph)PMR_	Phospho (STY)	sp|P29692|EF1D_HUMAN	1		_ASIGQS(ph)PGLPSTTFK_	Phospho (STY)	sp|Q5VT52|RPRD2_HUMAN	1		_ASVS(ph)GPNS(ph)PSETRR_	2 Phospho (STY)	sp|O15344|TRI18_HUMAN	0.961		_AVT(ph)PVPTK_	Phospho (STY)	sp|Q6PKG0|LARP1_HUMAN	0.974		_DLFDLNS(ph)SEEDDTEGFSER_	Phospho (STY)	sp|Q9Y3T9|NOC2L_HUMAN	0.984		_EGS(ph)PAPLEPEPGAAQPK_	Phospho (STY)	sp|Q01167|FOXK2_HUMAN	1		_ESEDKPEIEDVGS(ph)DEEEEKKDGDK_	Phospho (STY)	sp|P07900|HS90A_HUMAN	1		_EVS(ph)DDEAEEK_	Phospho (STY)	sp|P07900|HS90A_HUMAN	1		_GS(ph)FSDTGLGDGK_	Phospho (STY)	sp|Q9Y2W1|TR150_HUMAN	0.839
_ARS(ph)VDALDDLTPPSTAESGSR_	Phospho (STY)	sp|Q86X29|LSR_HUMAN	0.984		_ATDGDLAQEPGPGLTFEDS(ph)GNPKSPDK_	Phospho (STY)	sp|O15417|TNC18_HUMAN	0.869		_ASLGS(ph)LEGEAEAEASSPK_	Phospho (STY)	sp|Q09666|AHNK_HUMAN	0.95		_ASVS(ph)PMDEPVPDSESPIEK_	Phospho (STY)	sp|P46821|MAP1B_HUMAN	0.972		_AVTIANS(ph)PSKPSEK_	Phospho (STY)	sp|Q8NEF9|SRFB1_HUMAN	0.999		_DLFDYS(ph)PPLHK_	Phospho (STY)	sp|Q9NYF8|BCLF1_HUMAN	1		_EGS(ph)PIPHDPEFGSK_	Phospho (STY)	sp|P85037|FOXK1_HUMAN	1		_ESEEGNPVRGS(ph)EEDS(ph)PKK_	2 Phospho (STY)	sp|O43719|HTSF1_HUM+N1296AN	1		_EVS(ph)DDEAEEKEDKEEEK_	Phospho (STY)	sp|P07900|HS90A_HUMAN	1		_GS(ph)QGPLPFHEK_	Phospho (STY)	sp|Q9UBX3|DIC_HUMAN	1
_ARS(ph)VS(ph)PPPK_	Phospho (STY)	sp|Q13247|SRSF6_HUMAN	1		_ATDSDLSS(ph)PR_	Phospho (STY)	sp|Q9BRD0|BUD13_HUMAN	0.985		_ASLVALPEQT(ph)ASEEETPPPLLTK_	Phospho (STY)	sp|Q9UKV3|ACINU_HUMAN	0.853		_ASVSGPNS(ph)PSETRR_	Phospho (STY)	sp|O15344|TRI18_HUMAN	0.997		_AVVLPGGTATS(ph)PK_	Phospho (STY)	sp|Q8N1G0|ZN687_HUMAN	0.801		_DLFETGLEDENNS(ph)PLEDEESLESIR_	Phospho (STY)	sp|Q9HAW4|CLSPN_HUMAN	1		_EGSTQQLQTTS(ph)PK_	Phospho (STY)	sp|Q5T8P6|RBM26_HUMAN	0.848		_ESEEGNPVRGSEEDS(ph)PKK_	Phospho (STY)	sp|O43719|HTSF1_HUMAN	0.981		_EVYELLDS(ph)PGK_	Phospho (STY)	sp|P22234|PUR6_HUMAN	1		_GSET(ph)PGAT(ph)PGSK_	2 Phospho (STY)	sp|O75533|SF3B1_HUMAN	0.826
_ARSRT(ph)PPS(ph)APSQSR_	Phospho (STY)	sp|Q9UQ35|SRRM2_HUMAN	0.843		_ATEDGEEDEVS(ph)AGEK_	2 Phospho (STY)	sp|Q9BXW9|FACD2_HUMAN	1		_ASLVALPEQTAS(ph)EEETPPPLLTK_	Phospho (STY)	sp|Q9UKV3|ACINU_HUMAN	0.99		_ASVSPMDEPVPDSES(ph)PIEK_	Phospho (STY)	sp|P46821|MAP1B_HUMAN	0.971		_AVVVS(ph)PKEENK_	Phospho (STY)	sp|O75909|CCNK_HUMAN	1		_DLFSLDSEDPSPAS(ph)PPLR_	Phospho (STY)	sp|Q9BTK6|PAGR1_HUMAN	1		_EHSLQVS(ph)PSLEK_	Phospho (STY)	sp|O95235|KI20A_HUMAN	0.975		_ESGVVAVS(ph)PEKSES(ph)PQK_	2 Phospho (STY)	sp|Q96T58|MINT_HUMAN	0.878		_EYIPGQPPLSQSSDSS(ph)PTR_	Phospho (STY)	sp|P07814|SYEP_HUMAN	0.952		_GSFS(ph)DTGLGDGK_	Phospho (STY)	sp|Q9Y2W1|TR150_HUMAN	0.984
_AS(ph)DLEDEESAAR_	2 Phospho (STY)	sp|Q86VM9|ZCH18_HUMAN	1		_ATEETGQAQSGQANCQGLS(ph)PVSVASK_	Phospho (STY)	sp|Q9UHF7|TRPS1_HUMAN	0.944		_ASM(ox)SEFLES(ph)EDGEVEQQR_	Oxidation (M),Phospho (STY)	sp|Q15022|SUZ12_HUMAN	1		_ASVVDPSTESSPAPQEGSEQPASPAS(ph)PLSSR_	Phospho (STY)	sp|Q66K14|TBC9B_HUMAN	0.915		_AYS(ph)PEYR_	Phospho (STY)	sp|Q9UDY2|ZO2_HUMAN	1		_DLLHPS(ph)PEEEK_	Phospho (STY)	sp|P42677|RS27_HUMAN	1		_EIAIVHS(ph)DAEK_	Phospho (STY)	sp|Q9H307|PININ_HUMAN	1		_ESPRPLQLPGAEGPAIS(ph)DGEEGGGEPGAGGGAAGAAGAGR_	Phospho (STY)	sp|Q6PKG0|LARP1_HUMAN	1		_EYVSNDAAQS(ph)DDEEK_	Phospho (STY)	sp|Q5JSH3|WDR44_HUMAN	1		_GSGDIS(ph)SDS(ph)IDHS(ph)PAKK_	3 Phospho (STY)	sp|Q9H5I1|SUV92_HUMAN	0.868
_AS(ph)PAPGSGHPEGPGAHLDM(ox)NSLDR_	Phospho (STY)	sp|O94826|TOM70_HUMAN	0.979		_ATGDGS(ph)S(ph)PELPSLER_	Oxidation (M),Phospho (STY)	sp|Q9H2Y7|ZN106_HUMAN	0.995		_ASPEPQRENAS(ph)PAPGTTAEEAM(ox)SR_	Oxidation (M),Phospho (STY)	sp|P46379|BAG6_HUMAN	0.986		_AT(ph)NESEDEIPQLVPIGK_	2 Phospho (STY)	sp|O76021|RL1D1_HUMAN	0.807		_CAPS(ph)AGSPAAAVGRES(ph)PGAAATSSSGPQAQQHR_	2 Phospho (STY)	sp|Q7L2J0|MEPCE_HUMAN	0.801		_DLLSDLQDIS(ph)DSER_	Phospho (STY)	sp|Q9UQ88|CD11A_HUMAN	0.941		_EIAIVHS(ph)DAEKEQEEEEQK_	Phospho (STY)	sp|Q9H307|PININ_HUMAN	1		_ESRQES(ph)DPEDDDVK_	Phospho (STY)	sp|Q9H307|PININ_HUMAN	0.943		_FAS(ph)DDEHDEHDENGATGPVK_	Phospho (STY)	sp|P05455|LA_HUMAN	1		_GSGDIS(ph)SDS(ph)IDHSPAK_	2 Phospho (STY)	sp|Q9H5I1|SUV92_HUMAN	0.931
_AS(ph)PAPGSGHPEGPGAHLDMNSLDR_	Oxidation (M),Phospho (STY)	sp|O94826|TOM70_HUMAN	0.997		_ATGGLCLLGAYADS(ph)DDDDNDVSEK_	Oxidation (M),Phospho (STY)	sp|Q8N3X1|FNBP4_HUMAN	1		_ASS(ph)FSGISVLTR_	Phospho (STY)	sp|Q15032|R3HD1_HUMAN	0.966		_ATAPQT(ph)QHVSPMR_	Phospho (STY)	sp|P29692|EF1D_HUMAN	1		_CAPSAGS(ph)PAAAVGRES(ph)PGAAATSSSGPQAQQHR_	2 Phospho (STY)	sp|Q7L2J0|MEPCE_HUMAN	0.942		_DLNLPAS(ph)LPEEK_	Phospho (STY)	sp|Q33E94|RFX4_HUMAN	1		_EIAIVHS(ph)DAEKEQEEEEQKQEM(ox)EVK_	Oxidation (M),Phospho (STY)	sp|Q9H307|PININ_HUMAN	1		_ESRRS(ph)ES(ph)LS(ph)PR_	3 Phospho (STY)	sp|Q99590|SCAFB_HUMAN	0.918		_FDIYDPFHPTDEAYS(ph)PPPAPEQK_	Phospho (STY)	sp|Q9H7N4|SFR19_HUMAN	0.999		_GSGGS(ph)S(ph)GDELREDDEPVK_	2 Phospho (STY)	sp|Q7Z4V5|HDGR2_HUMAN	0.934
_AS(ph)PDQNASTHTPQSSVK_	Phospho (STY)	sp|Q14677|EPN4_HUMAN	0.994		_ATIS(ph)DEEIER_	Phospho (STY)	sp|Q9UQN3|CHM2B_HUMAN	1		_ASS(ph)LEDLVLK_	Phospho (STY)	sp|Q15477|SKIV2_HUMAN	0.948		_ATAPQTQHVS(ph)PM(ox)R_	Phospho (STY)	sp|P29692|EF1D_HUMAN	1		_CDILVQEELLAS(ph)PKK_	Phospho (STY)	sp|Q96JM3|CHAP1_HUMAN	1		_DLPAQRGEES(ph)S(ph)EEEEK_	2 Phospho (STY)	sp|Q9BW71|HIRP3_HUMAN	1		_EIPSATQS(ph)PISK_	Phospho (STY)	sp|Q9BQG0|MBB1A_HUMAN	0.941		_ESSANNSVS(ph)PSESLR_	Phospho (STY)	sp|Q04726|TLE3_HUMAN	0.89		_FEEESKEPVADEEEEDS(ph)DDDVEPITEFR_	Phospho (STY)	sp|P54105|ICLN_HUMAN	1		_GSGT(ph)ASDDEFENLR_	Phospho (STY)	sp|Q7Z6Z7|HUWE1_HUMAN	0.848
_AS(ph)PEPQRENASPAPGTTAEEAM(ox)SR_	Phospho (STY)	sp|P46379|BAG6_HUMAN	0.999		_ATNES(ph)EDEIPQLVPIGK_	Phospho (STY)	sp|O76021|RL1D1_HUMAN	0.995		_ASS(ph)LGEIDESSELR_	Phospho (STY)	sp|Q16513|PKN2_HUMAN	0.82		_ATAPQTQHVS(ph)PMR_	Phospho (STY)	sp|P29692|EF1D_HUMAN	1		_CGGVEQASSS(ph)PR_	Phospho (STY)	sp|Q5VZL5|ZMYM4_HUMAN	0.981		_DLPDGHAAS(ph)PR_	Phospho (STY)	sp|Q9P1Y5|CAMP3_HUMAN	1		_EIS(ph)DDEAEEEK_	Phospho (STY)	sp|P08238|HS90B_HUMAN	1		_ESVPEFPLS(ph)PPK_	Phospho (STY)	sp|P16949|STMN1_HUMAN	1		_FFLS(ph)INWQDVVQK_	Phospho (STY)	sp|P31751|AKT2_HUMAN	1		_GSGTAS(ph)DDEFENLR_	Phospho (STY)	sp|Q7Z6Z7|HUWE1_HUMAN	1
_AS(ph)WESLDEEWR_	Phospho (STY)	sp|Q00587|BORG5_HUMAN	1		_ATPATAPGTS(ph)PR_	Phospho (STY)	sp|Q96P47|AGAP3_HUMAN	0.958		_ASS(ph)PELPVSVENIK_	Phospho (STY)	sp|Q969R5|LMBL2_HUMAN	0.968		_ATDGDLAQEPGPGLTFEDS(ph)GNPKSPDK_	Phospho (STY)	sp|O15417|TNC18_HUMAN	0.825		_CGSGPVHISGQHLVAVEEDAES(ph)EDEEEEDVK_	Phospho (STY)	sp|P06748|NPM_HUMAN	1		_DLPS(ph)PDSR_	Phospho (STY)	sp|Q9UGU0|TCF20_HUMAN	0.996		_EIS(ph)DDEAEEEKGEK_	Phospho (STY)	sp|P08238|HS90B_HUMAN	1		_ETAPEEPGS(ph)PAK_	Phospho (STY)	sp|P35612|ADDB_HUMAN	1		_FGQAATM(ox)EGIGAIGGT(ph)PPAFNR_	Oxidation (M),Phospho (STY)	sp|Q15233|NONO_HUMAN	1		_GSSPT(ph)PPCS(ph)PVQPSK_	2 Phospho (STY)	sp|Q9NUL3|STAU2_HUMAN	0.951
_ASALLFSS(ph)DEEDQWNIPASQTHLASDSR_	Phospho (STY)	sp|Q641Q2|FA21A_HUMAN	0.809		_ATS(ph)PLVSLYPALECR_	Phospho (STY)	sp|Q96G74|OTUD5_HUMAN	0.822		_ASS(ph)PFR_	Phospho (STY)	sp|Q14978|NOLC1_HUMAN	1		_ATDGDLAQEPGPGLTFEDSGNPKS(ph)PDK_	Phospho (STY)	sp|O15417|TNC18_HUMAN	0.815		_CILGMLS(ph)Y(ph)T(ph)TR_	3 Phospho (STY)	sp|Q5T3U5|MRP7_HUMAN	0.995		_DLQEQDADAGS(ph)ER_	Phospho (STY)	sp|Q6P158|DHX57_HUMAN	1		_EIS(ph)DDEAEEEKGEKEEEDK_	Phospho (STY)	sp|P08238|HS90B_HUMAN	1		_ETAPEEPGS(ph)PAKS(ph)APAS(ph)PVQS(ph)PAK_	4 Phospho (STY)	sp|P35612|ADDB_HUMAN	0.995		_FGQAATMEGIGAIGGT(ph)PPAFNR_	Phospho (STY)	sp|Q15233|NONO_HUMAN	1		_GTGQS(ph)DDS(ph)DIWDDTALIK_	2 Phospho (STY)	sp|Q16637|SMN_HUMAN	0.821
_ASAPS(ph)PNAQVACDHCLK_	Phospho (STY)	sp|Q14258|TRI25_HUMAN	0.999		_ATS(ph)PSSSVSGDFDDGHHSVSTPGPSR_	Phospho (STY)	sp|Q86U86|PB1_HUMAN	0.85		_ASS(ph)PPDRIDIFGR_	Phospho (STY)	sp|Q9NWB6|ARGL1_HUMAN	0.973		_ATDIPASAS(ph)PPPVAGVPFFK_	Phospho (STY)	sp|Q8N1G0|ZN687_HUMAN	0.958		_CRS(ph)PGM(ox)LEPLGSSR_	Oxidation (M),Phospho (STY)	sp|Q9UQ35|SRRM2_HUMAN	1		_DLVLPTQALPAS(ph)PALK_	Phospho (STY)	sp|Q15554|TERF2_HUMAN	1		_EKEDNSS(ph)EEEEEIEPFPEER_	Phospho (STY)	sp|Q4LE39|ARI4B_HUMAN	0.817		_ETAPEEPGS(ph)PAKS(ph)APAS(ph)PVQSPAK_	3 Phospho (STY)	sp|P35612|ADDB_HUMAN	0.985		_FLENGS(ph)QEDLLHGNPGSTYLASNSTSAPNWK_	Phospho (STY)	sp|Q7Z2W4|ZCCHV_HUMAN	0.999		_HAS(ph)APSHVQPSDSEK_	Phospho (STY)	sp|O60343|TBCD4_HUMAN	0.973
_ASASRPQPAPADGADPPPAEEPEARPDGEGS(ph)PGK_	Phospho (STY)	sp|P11274|BCR_HUMAN	1		_ATSSS(ph)NPSS(ph)PAPDWYK_	Phospho (STY)	sp|P46100|ATRX_HUMAN	0.978		_ASS(ph)PSPLTIGTPESQR_	Phospho (STY)	sp|Q9NPI6|DCP1A_HUMAN	0.87		_ATEDGEEDEVS(ph)AGEK_	Oxidation (M),Phospho (STY)	sp|Q9BXW9|FACD2_HUMAN	1		_CRS(ph)PGMLEPLGSSR_	Phospho (STY)	sp|Q9UQ35|SRRM2_HUMAN	1		_DLVQPDKPAS(ph)PK_	Phospho (STY)	sp|Q6PJT7|ZC3HE_HUMAN	1		_EKEIS(ph)DDEAEEEK_	Phospho (STY)	sp|P08238|HS90B_HUMAN	1		_ETES(ph)APGS(ph)PR_	2 Phospho (STY)	sp|Q6PKG0|LARP1_HUMAN	0.991		_FLESAAADFS(ph)DEDEDDDVDGREK_	Phospho (STY)	sp|O43815|STRN_HUMAN	1		_HAS(ph)S(ph)S(ph)PESPKPAPAPGSHR_	3 Phospho (STY)	sp|Q9UQ35|SRRM2_HUMAN	0.987
_ASATCSSATAAASS(ph)GLEEWTSRSPR_	Phospho (STY)	sp|Q96G74|OTUD5_HUMAN	0.852		_ATSVALPGWS(ph)PSETR_	Phospho (STY)	sp|Q16513|PKN2_HUMAN	0.965		_ASSGDQGS(ph)PPCFLR_	Phospho (STY)	sp|O75147|OBSL1_HUMAN	1		_ATEETGQAQSGQANCQGLS(ph)PVSVASK_	Phospho (STY)	sp|Q9UHF7|TRPS1_HUMAN	0.942		_CS(ph)PLEPDFVPDEK_	Phospho (STY)	sp|Q5JSZ5|PRC2B_HUMAN	1		_DM(ox)DEPS(ph)PVPNVEEVTLPK_	Oxidation (M),Phospho (STY)	sp|Q8TAQ2|SMRC2_HUMAN	1		_EKEPGEQASVPLS(ph)PKK_	Phospho (STY)	sp|P42858|HD_HUMAN	1		_ETQS(ph)PEQVK_	Phospho (STY)	sp|Q9NYF8|BCLF1_HUMAN	1		_FSGEEGEIEDDES(ph)GTENREEK_	Phospho (STY)	sp|Q9Y2W1|TR150_HUMAN	0.99		_HAS(ph)SSPES(ph)PKPAPAPGSHR_	2 Phospho (STY)	sp|Q9UQ35|SRRM2_HUMAN	0.912
_ASAVSELS(ph)PR_	Phospho (STY)	sp|Q9Y2W1|TR150_HUMAN	1		_ATT(ph)PPNQGRPDS(ph)PVYANLQELK_	Phospho (STY)	sp|Q8IWW6|RHG12_HUMAN	0.838		_ASSLSESS(ph)PPK_	Phospho (STY)	sp|Q9UHB6|LIMA1_HUMAN	0.994		_ATGDGS(ph)S(ph)PELPSLER_	Phospho (STY)	sp|Q9H2Y7|ZN106_HUMAN	0.938		_CTLPEHESPS(ph)QDISDACEAESTER_	Phospho (STY)	sp|Q32MZ4|LRRF1_HUMAN	0.806		_DM(ox)PGGFLFEGLS(ph)DDEDDFHPNTR_	Oxidation (M),Phospho (STY)	sp|Q96S82|UBL7_HUMAN	1		_EKPDS(ph)DDDLDIASLVTAK_	Phospho (STY)	sp|Q86V48|LUZP1_HUMAN	1		_EVAENQQNQS(ph)SDPEEEK_	Phospho (STY)	sp|O43491|E41L2_HUMAN	0.978		_FTDKDQQPS(ph)GS(ph)EGEDDDAEAALKK_	2 Phospho (STY)	sp|Q9NXG2|THUM1_HUMAN	1		_HASS(ph)S(ph)PES(ph)PKPAPAPGSHR_	3 Phospho (STY)	sp|Q9UQ35|SRRM2_HUMAN	0.881
_ASEGLDACASPT(ph)K_	Phospho (STY)	sp|Q92618|ZN516_HUMAN	0.945		_ATVT(ph)PS(ph)PVK_	Phospho (STY)	sp|Q9H1E3|NUCKS_HUMAN	1		_ASSPS(ph)PLTIGTPESQR_	Phospho (STY)	sp|Q9NPI6|DCP1A_HUMAN	0.999		_ATGGLCLLGAYADS(ph)DDDDNDVSEK_	Phospho (STY)	sp|Q8N3X1|FNBP4_HUMAN	0.999		_DAAAHLQTSHKPSAEDAEGQS(ph)PLSQK_	Phospho (STY)	sp|Q96F24|NRBF2_HUMAN	0.983		_DMDEPS(ph)PVPNVEEVTLPK_	Phospho (STY)	sp|Q8TAQ2|SMRC2_HUMAN	1		_EKRT(ph)PAPEPEPCEASELPAK_	Phospho (STY)	sp|Q9ULV3|CIZ1_HUMAN	1		_EVAQT(ph)ADAR_	Phospho (STY)	sp|P19174|PLCG1_HUMAN	1		_FVPAENDSILM(ox)NPAQDGEVQLS(ph)QNDDK_	Oxidation (M),Phospho (STY)	sp|Q12888|TP53B_HUMAN	1		_HCAPS(ph)PDRS(ph)PELSSSR_	2 Phospho (STY)	sp|Q96T37|RBM15_HUMAN	0.993
_ASEPLLS(ph)PPPFGESR_	Oxidation (M),Phospho (STY)	sp|O14686|KMT2D_HUMAN	0.862		_ATVTPS(ph)PVK_	Phospho (STY)	sp|Q9H1E3|NUCKS_HUMAN	1		_ASSSGPRS(ph)PLDQR_	Phospho (STY)	sp|O14646|CHD1_HUMAN	0.997		_ATIS(ph)DEEIER_	Phospho (STY)	sp|Q9UQN3|CHM2B_HUMAN	1		_DAASKPSGEGSFSKPGDGGS(ph)PSKPSDHEPPK_	Phospho (STY)	sp|O14654|IRS4_HUMAN	0.943		_DMES(ph)PTK_	Phospho (STY)	sp|P27816|MAP4_HUMAN	0.978		_EKS(ph)PVREPVDNLSPEER_	Phospho (STY)	sp|Q86U06|RBM23_HUMAN	1		_EVDEDS(ph)EPEREVR_	Phospho (STY)	sp|Q53GS9|SNUT2_HUMAN	1		_GAAEEAELEDS(ph)DDEEKPVKQDDFPK_	Phospho (STY)	sp|Q9UBB9|TFP11_HUMAN	1		_HDS(ph)PDPS(ph)PPR_	2 Phospho (STY)	sp|Q9BRD0|BUD13_HUMAN	1
_ASES(ph)SSEEKDDYEIFVK_	Phospho (STY)	sp|P18583|SON_HUMAN	0.91		_AVAS(ph)PEATVSQTDENK_	Phospho (STY)	sp|Q641Q2|FA21A_HUMAN	1		_ASSVSTKES(ph)PAR_	Phospho (STY)	sp|Q13428|TCOF_HUMAN	0.968		_ATNES(ph)EDEIPQLVPIGK_	Phospho (STY)	sp|O76021|RL1D1_HUMAN	0.991		_DADLS(ph)PVNASIIK_	Phospho (STY)	sp|O75970|MPDZ_HUMAN	1		_DMES(ph)PTKLDVTLAK_	Phospho (STY)	sp|P27816|MAP4_HUMAN	1		_EKT(ph)PELPEPSVK_	Phospho (STY)	sp|Q8IYB3|SRRM1_HUMAN	1		_EVDGLLTSEPM(ox)GS(ph)PVSSK_	Oxidation (M),Phospho (STY)	sp|Q8WWM7|ATX2L_HUMAN	1		_GADNDGS(ph)GSESGYTTPK_	Phospho (STY)	sp|Q7Z417|NUFP2_HUMAN	0.995		_HDT(ph)PDPS(ph)PLR_	2 Phospho (STY)	sp|Q9BRD0|BUD13_HUMAN	1
_ASFDHS(ph)PDSLPLR_	Phospho (STY)	sp|Q8NB78|KDM1B_HUMAN	0.995		_AVEES(ph)S(ph)DEERQR_	Phospho (STY)	sp|Q9BW71|HIRP3_HUMAN	1		_ASSVSTKES(ph)PARK_	Phospho (STY)	sp|Q13428|TCOF_HUMAN	0.94		_ATSS(ph)SSGSLSATGR_	Phospho (STY)	sp|Q03252|LMNB2_HUMAN	0.889		_DAEYIYPS(ph)LES(ph)DDDDPALK_	2 Phospho (STY)	sp|Q9UPP1|PHF8_HUMAN	0.999		_DNEEREQSSDLTPSGDVS(ph)PVKPLSR_	Phospho (STY)	sp|Q8WYQ5|DGCR8_HUMAN	1		_EKT(ph)PS(ph)PKEEDEEPESPPEK_	2 Phospho (STY)	sp|Q9H1E3|NUCKS_HUMAN	1		_EVLYDS(ph)EGLS(ph)GEER_	2 Phospho (STY)	sp|Q9H7N4|SFR19_HUMAN	1		_GADS(ph)GEEKEEGINREDK_	Phospho (STY)	sp|Q9BVG4|PBDC1_HUMAN	1		_HEAPSS(ph)PISGQPCGDDQNAS(ph)PSK_	2 Phospho (STY)	sp|O75376|NCOR1_HUMAN	0.827
_ASGGAQS(ph)PLR_	Phospho (STY)	sp|Q6NXT1|ANR54_HUMAN	0.999		_AVLSDS(ph)PQLSEGK_	Phospho (STY)	sp|Q7Z4H7|HAUS6_HUMAN	0.997		_ASVS(ph)GPNS(ph)PSETRR_	2 Phospho (STY)	sp|O15344|TRI18_HUMAN	0.878		_ATSSS(ph)NPSS(ph)PAPDWYK_	Oxidation (M),Phospho (STY)	sp|P46100|ATRX_HUMAN	0.921		_DAEYIYPSLES(ph)DDDDPALK_	Phospho (STY)	sp|Q9UPP1|PHF8_HUMAN	1		_DNPS(ph)PEPQLDDIKR_	Phospho (STY)	sp|Q96JC9|EAF1_HUMAN	1		_EKTPS(ph)PKEEDEEPES(ph)PPEK_	2 Phospho (STY)	sp|Q9H1E3|NUCKS_HUMAN	0.998		_EVS(ph)DDEAEEK_	Phospho (STY)	sp|P07900|HS90A_HUMAN	1		_GAEAFGDS(ph)EEDGEDVFEVEK_	Phospho (STY)	sp|Q99549|MPP8_HUMAN	1		_HEVSASTQS(ph)T(ph)PASSR_	2 Phospho (STY)	sp|Q01082|SPTB2_HUMAN	1
_ASGQAFELILS(ph)PR_	2 Phospho (STY)	sp|P16949|STMN1_HUMAN	1		_AVPIAVADEGES(ph)ES(ph)EDDDLKPR_	Phospho (STY)	sp|Q9Y2K6|UBP20_HUMAN	1		_ASVSGPNS(ph)PSETRR_	Phospho (STY)	sp|O15344|TRI18_HUMAN	0.999		_ATSSSSGS(ph)LSATGR_	Phospho (STY)	sp|Q03252|LMNB2_HUMAN	0.955		_DAGGPRPES(ph)PVPAGR_	Phospho (STY)	sp|Q9BVG9|PTSS2_HUMAN	1		_DNQESS(ph)DAELSSSEYIK_	Phospho (STY)	sp|Q96JM3|CHAP1_HUMAN	0.973		_EKTPS(ph)PKEEDEEPESPPEK_	Phospho (STY)	sp|Q9H1E3|NUCKS_HUMAN	0.904		_EVS(ph)DDEAEEKEDKEEEK_	Phospho (STY)	sp|P07900|HS90A_HUMAN	1		_GAEETSWS(ph)GEER_	Phospho (STY)	sp|Q9H7N4|SFR19_HUMAN	1		_HGS(ph)FHEDEDPIGS(ph)PR_	2 Phospho (STY)	sp|Q96T58|MINT_HUMAN	1
_ASIGQS(ph)PGLPSTTFK_	Phospho (STY)	sp|Q5VT52|RPRD2_HUMAN	1		_AVPMAPAPAS(ph)PGSSNDSSAR_	2 Phospho (STY)	sp|Q66K74|MAP1S_HUMAN	0.942		_ASVVDPSTESSPAPQEGSEQPASPAS(ph)PLSSR_	Phospho (STY)	sp|Q66K14|TBC9B_HUMAN	0.877		_ATVT(ph)PS(ph)PVK_	Phospho (STY)	sp|Q9H1E3|NUCKS_HUMAN	1		_DAPIS(ph)PASIASSSSTPSSK_	Phospho (STY)	sp|Q04727|TLE4_HUMAN	1		_DNTFFRES(ph)PVGR_	Phospho (STY)	sp|Q8NEY8|PPHLN_HUMAN	1		_EKTPSPKEEDEEPES(ph)PPEK_	Phospho (STY)	sp|Q9H1E3|NUCKS_HUMAN	1		_EVS(ph)PVEIPGQT(ph)LR_	2 Phospho (STY)	sp|A6NGS2|ERIC4_HUMAN	1		_GAGDGS(ph)DEEVDGK_	Phospho (STY)	sp|P35579|MYH9_HUMAN	1		_HGSSDIS(ph)S(ph)PR_	2 Phospho (STY)	sp|Q9BRD0|BUD13_HUMAN	0.892
_ASLGS(ph)LEGEAEAEASSPK_	Phospho (STY)	sp|Q09666|AHNK_HUMAN	0.998		_AVQQHQHGYDS(ph)DEEVDSELGTWEHQLR_	Oxidation (M),Phospho (STY)	sp|Q8IWZ8|SUGP1_HUMAN	0.998		_AT(ph)NESEDEIPQLVPIGK_	Phospho (STY)	sp|O76021|RL1D1_HUMAN	0.82		_ATVT(ph)PSPVK_	Phospho (STY)	sp|Q9H1E3|NUCKS_HUMAN	0.92		_DAPTS(ph)PASVASSSSTPSSK_	Phospho (STY)	sp|Q04726|TLE3_HUMAN	0.997		_DPAQPM(ox)S(ph)PGEATQSGARPADR_	Oxidation (M),Phospho (STY)	sp|Q9BQG0|MBB1A_HUMAN	0.998		_ELAANSSRST(ph)T(ph)PRGK_	2 Phospho (STY)	sp|Q4AC94|C2CD3_HUMAN	0.927		_EVYELLDS(ph)PGK_	Phospho (STY)	sp|P22234|PUR6_HUMAN	1		_GAGDGS(ph)DEEVDGKADGAEAKPAE_	Phospho (STY)	sp|P35579|MYH9_HUMAN	1		_HGT(ph)PDPS(ph)PR_	2 Phospho (STY)	sp|Q9BRD0|BUD13_HUMAN	1
_ASLVALPEQT(ph)ASEEETPPPLLTK_	Phospho (STY)	sp|Q9UKV3|ACINU_HUMAN	0.918		_AVS(ph)PPHLDGPPS(ph)PR_	Phospho (STY)	sp|P29590|PML_HUMAN	1		_ATAPQT(ph)QHVSPM(ox)R_	Oxidation (M),Phospho (STY)	sp|P29692|EF1D_HUMAN	0.975		_ATVTPS(ph)PVK_	Phospho (STY)	sp|Q9H1E3|NUCKS_HUMAN	1		_DAQRLS(ph)PIPEEVPK_	Phospho (STY)	sp|Q96T23|RSF1_HUMAN	1		_DQEPKPS(ph)PEPAAVSR_	Phospho (STY)	sp|Q9H7S9|ZN703_HUMAN	1		_ELDQDM(ox)VT(ph)EDEDDPGSHK_	Oxidation (M),Phospho (STY)	sp|Q9NRL2|BAZ1A_HUMAN	1		_EYFDDST(ph)EER_	Phospho (STY)	sp|Q8NEF9|SRFB1_HUMAN	0.946		_GAVAAEGASDT(ph)EREEPTESQGLAAR_	Phospho (STY)	sp|Q9P1Y6|PHRF1_HUMAN	0.987		_HIKEEPLS(ph)EEEPCTSTAIAS(ph)PEK_	2 Phospho (STY)	sp|Q9Y2X3|NOP58_HUMAN	1
_ASLVALPEQTAS(ph)EEETPPPLLTK_	Phospho (STY)	sp|Q9UKV3|ACINU_HUMAN	0.97		_AVS(ph)VPASFFR_	Phospho (STY)	sp|O14654|IRS4_HUMAN	0.998		_ATAPQTQHVS(ph)PM(ox)R_	Oxidation (M),Phospho (STY)	sp|P29692|EF1D_HUMAN	1		_AVEES(ph)S(ph)DEERQR_	Phospho (STY)	sp|Q9BW71|HIRP3_HUMAN	1		_DAS(ph)PINR_	Phospho (STY)	sp|Q13523|PRP4B_HUMAN	1		_DQHLNNSSSS(ph)PQR_	Phospho (STY)	sp|Q15154|PCM1_HUMAN	0.981		_ELES(ph)SEEGGSAEER_	Phospho (STY)	sp|Q9HAS0|NJMU_HUMAN	0.88		_EYT(ph)MHDHNTLLK_	Phospho (STY)	sp|Q96PY5|FMNL2_HUMAN	0.989		_GDDDEES(ph)DEEAVKK_	Phospho (STY)	sp|O43395|PRPF3_HUMAN	1		_HIKEEPLS(ph)EEEPCTSTAIAS(ph)PEKK_	2 Phospho (STY)	sp|Q9Y2X3|NOP58_HUMAN	0.999
_ASLVALPEQTASEEET(ph)PPPLLTK_	2 Phospho (STY)	sp|Q9UKV3|ACINU_HUMAN	0.969		_AVSETPAVPPVS(ph)EDEDDDDDDATPPPVIAPRPEHTK_	Phospho (STY)	sp|Q13153|PAK1_HUMAN	1		_ATAPQTQHVS(ph)PMR_	Phospho (STY)	sp|P29692|EF1D_HUMAN	1		_AVLSDS(ph)PQLSEGK_	Phospho (STY)	sp|Q7Z4H7|HAUS6_HUMAN	0.999		_DAS(ph)PINRWS(ph)PTR_	2 Phospho (STY)	sp|Q13523|PRP4B_HUMAN	1		_DQKKVM(ox)VM(ox)T(ph)S(ph)S(ph)EHTETK_	2 Oxidation (M),3 Phospho (STY)	sp|A4UGR9|XIRP2_HUMAN	0.997		_ELQS(ph)LS(ph)LQR_	2 Phospho (STY)	sp|Q9NW81|AT5SL_HUMAN	1		_EYVSNDAAQS(ph)DDEEK_	Phospho (STY)	sp|Q5JSH3|WDR44_HUMAN	1		_GDLAFGAPGPRPPS(ph)PFDDPADDPEHK_	Phospho (STY)	sp|Q93074|MED12_HUMAN	1		_HIKEEPLS(ph)EEEPCTSTAIASPEK_	Phospho (STY)	sp|Q9Y2X3|NOP58_HUMAN	1
_ASM(ox)SEFLES(ph)EDGEVEQQR_	2 Phospho (STY)	sp|Q15022|SUZ12_HUMAN	1		_AVSTVVVTTAPS(ph)PK_	Phospho (STY)	sp|Q6P4R8|NFRKB_HUMAN	0.98		_ATDIPAS(ph)ASPPPVAGVPFFK_	Phospho (STY)	sp|Q8N1G0|ZN687_HUMAN	0.864		_AVPALGKS(ph)PPHHSGFQQYQQADASK_	Phospho (STY)	sp|Q92540|SMG7_HUMAN	0.931		_DAS(ph)PTPSTDAEYPANGSGADR_	Phospho (STY)	sp|O43639|NCK2_HUMAN	0.958		_DQQPS(ph)GS(ph)EGEDDDAEAALKK_	2 Phospho (STY)	sp|Q9NXG2|THUM1_HUMAN	1		_ELS(ph)PAALEK_	Phospho (STY)	sp|O75683|SURF6_HUMAN	1		_FAS(ph)DDEHDEHDENGATGPVK_	Phospho (STY)	sp|P05455|LA_HUMAN	1		_GDLS(ph)DVEEEEEEEMDVDEATGAVK_	Phospho (STY)	sp|Q96ST3|SIN3A_HUMAN	1		_HIVSNDSSDS(ph)DDESHEPK_	Phospho (STY)	sp|P47712|PA24A_HUMAN	0.927
_ASPEPQRENAS(ph)PAPGTTAEEAM(ox)SR_	Phospho (STY)	sp|P46379|BAG6_HUMAN	0.994		_AVT(ph)PVPTK_	Phospho (STY)	sp|Q6PKG0|LARP1_HUMAN	0.994		_ATDSDLSS(ph)PR_	Phospho (STY)	sp|Q9BRD0|BUD13_HUMAN	0.999		_AVPGGS(ph)PK_	Phospho (STY)	sp|Q96DR7|ARHGQ_HUMAN	1		_DASSS(ph)PASTASSASSTSLK_	Phospho (STY)	sp|Q04724|TLE1_HUMAN	0.921		_DQS(ph)PFSK_	Phospho (STY)	sp|Q13427|PPIG_HUMAN	1		_ELS(ph)PAGSISK_	Phospho (STY)	sp|O95453|PARN_HUMAN	0.987		_FEEESKEPVADEEEEDS(ph)DDDVEPITEFR_	Phospho (STY)	sp|P54105|ICLN_HUMAN	1		_GDPPRLS(ph)PDPVAGSAVSQELR_	Phospho (STY)	sp|Q9BUR4|WAP53_HUMAN	1		_HKS(ph)ES(ph)PCESPYPNEK_	2 Phospho (STY)	sp|Q8NI27|THOC2_HUMAN	0.998
_ASPFSVESLLSDS(ph)PPR_	Phospho (STY)	sp|A6NJT0|UNC4_HUMAN	0.996		_AVTIANS(ph)PSKPSEK_	Phospho (STY)	sp|Q8NEF9|SRFB1_HUMAN	1		_ATEDGEEDEVS(ph)AGEK_	Phospho (STY)	sp|Q9BXW9|FACD2_HUMAN	1		_AVPM(ox)APAPAS(ph)PGSSNDSSAR_	Phospho (STY)	sp|Q66K74|MAP1S_HUMAN	0.931		_DCLIEDS(ph)DDEAGQS_	Phospho (STY)	sp|Q2VPK5|CTU2_HUMAN	1		_DQSPFS(ph)K_	Phospho (STY)	sp|Q13427|PPIG_HUMAN	0.963		_EM(ox)EHNT(ph)VCAAGTSPVGEIGEEK_	Oxidation (M),Phospho (STY)	sp|P18583|SON_HUMAN	0.95		_FGSTGST(ph)PPVS(ph)PTPSER_	2 Phospho (STY)	sp|Q969V6|MKL1_HUMAN	0.816		_GDQPAASGDS(ph)DDDEPPPLPR_	Phospho (STY)	sp|O00264|PGRC1_HUMAN	1		_HKSDS(ph)PES(ph)DAEREK_	2 Phospho (STY)	sp|O75400|PR40A_HUMAN	1
_ASPS(ph)PQPSSQPLQIHR_	2 Phospho (STY)	sp|Q9HC35|EMAL4_HUMAN	0.977		_AVTTVTQSTPVPGPSVPPPEELQVS(ph)PGPR_	Phospho (STY)	sp|P51610|HCFC1_HUMAN	1		_ATEETGQAQSGQANCQGLS(ph)PVSVASK_	Phospho (STY)	sp|Q9UHF7|TRPS1_HUMAN	0.986		_AVPMAPAPAS(ph)PGSSNDSSAR_	Phospho (STY)	sp|Q66K74|MAP1S_HUMAN	0.923		_DCSYGAVTS(ph)PTSTLESR_	Phospho (STY)	sp|Q9HCD6|TANC2_HUMAN	0.808		_DRHDT(ph)PDPS(ph)PR_	2 Phospho (STY)	sp|Q9BRD0|BUD13_HUMAN	1		_EM(ox)EHNTVCAAGTS(ph)PVGEIGEEK_	Oxidation (M),Phospho (STY)	sp|P18583|SON_HUMAN	0.982		_FHS(ph)PSTTWS(ph)PNK_	2 Phospho (STY)	sp|Q99590|SCAFB_HUMAN	0.998		_GDQVLNFS(ph)DAEDLIDDSK_	Phospho (STY)	sp|Q96EZ8|MCRS1_HUMAN	1		_HM(ox)DPPPAPVQDRS(ph)PS(ph)PR_	Oxidation (M),2 Phospho (STY)	sp|P46821|MAP1B_HUMAN	1
_ASPSCSS(ph)PTRDSSGVPVSK_	Phospho (STY)	sp|Q8N5I9|CL045_HUMAN	0.9		_AVVVS(ph)PKEENK_	Phospho (STY)	sp|O75909|CCNK_HUMAN	1		_ATGDGS(ph)S(ph)PELPSLER_	2 Phospho (STY)	sp|Q9H2Y7|ZN106_HUMAN	0.999		_AVPMAPAPASPGS(ph)SNDSSAR_	Phospho (STY)	sp|Q66K74|MAP1S_HUMAN	0.802		_DDEEKPKIEDVGS(ph)DEEDDSGK_	Phospho (STY)	sp|P08238|HS90B_HUMAN	1		_DRICS(ph)DEEEDEEK_	Phospho (STY)	sp|Q9NPG3|UBN1_HUMAN	1		_ENAS(ph)PAPGTTAEEAM(ox)SR_	Oxidation (M),Phospho (STY)	sp|P46379|BAG6_HUMAN	1		_FKEGAEMES(ph)S(ph)KEDK_	2 Phospho (STY)	sp|Q9H173|SIL1_HUMAN	1		_GDSET(ph)DLEALFNAVM(ox)NPK_	Oxidation (M),Phospho (STY)	sp|P46937|YAP1_HUMAN	0.831		_HPKGEEGS(ph)DDDETENGPKPK_	Phospho (STY)	sp|Q6PD62|CTR9_HUMAN	1
_ASQEPS(ph)PKPGTEVIPAAPR_	Phospho (STY)	sp|Q96CP2|FWCH2_HUMAN	0.931		_AYRPPS(ph)GEK_	Oxidation (M),Phospho (STY)	sp|P30414|NKTR_HUMAN	1		_ATGGLCLLGAYADS(ph)DDDDNDVSEK_	Phospho (STY)	sp|Q8N3X1|FNBP4_HUMAN	1		_AVPPVS(ph)PELR_	2 Phospho (STY)	sp|Q96JM3|CHAP1_HUMAN	1		_DDEEKPKIEDVGS(ph)DEEDDSGKDK_	Phospho (STY)	sp|P08238|HS90B_HUMAN	0.999		_DRS(ph)PHRS(ph)SPSDTRPK_	2 Phospho (STY)	sp|Q8IWS0|PHF6_HUMAN	0.986		_ENIKPNETS(ph)PSFSK_	Phospho (STY)	sp|Q99700|ATX2_HUMAN	0.827		_FM(ox)EQSRSPS(ph)VS(ph)PSK_	Oxidation (M),2 Phospho (STY)	sp|Q96JG6|CC132_HUMAN	0.859		_GDVTAEEAAGAS(ph)PAK_	Phospho (STY)	sp|P49006|MRP_HUMAN	1		_HPNYS(ph)PPGS(ph)PIEK_	2 Phospho (STY)	sp|Q9UHF7|TRPS1_HUMAN	0.997
_ASS(ph)FADM(ox)M(ox)GILK_	Phospho (STY)	sp|Q9H019|MFR1L_HUMAN	0.94		_AYS(ph)PEYR_	Phospho (STY)	sp|Q9UDY2|ZO2_HUMAN	1		_ATIS(ph)DEEIER_	Phospho (STY)	sp|Q9UQN3|CHM2B_HUMAN	1		_AVQQHQHGYDS(ph)DEEVDSELGTWEHQLR_	2 Phospho (STY)	sp|Q8IWZ8|SUGP1_HUMAN	0.997		_DDFES(ph)EEEDVK_	Phospho (STY)	sp|Q7Z6E9|RBBP6_HUMAN	1		_DRS(ph)PHRSS(ph)PSDTRPK_	2 Phospho (STY)	sp|Q8IWS0|PHF6_HUMAN	0.896		_ENIT(ph)VPLQT(ph)DLR_	2 Phospho (STY)	sp|O75460|ERN1_HUMAN	1		_FNGGHS(ph)PTHS(ph)PEK_	2 Phospho (STY)	sp|Q9Y5K6|CD2AP_HUMAN	0.988		_GEAAAERPGEAAVASS(ph)PSK_	Phospho (STY)	sp|P29966|MARCS_HUMAN	0.839		_HQAS(ph)DS(ph)ENEELPKPR_	2 Phospho (STY)	sp|Q96ST2|IWS1_HUMAN	1
_ASS(ph)FSGISVLTR_	Phospho (STY)	sp|Q15032|R3HD1_HUMAN	0.929		_AYT(ph)HQVVTR_	Phospho (STY)	sp|P50613|CDK7_HUMAN	1		_ATNES(ph)EDEIPQLVPIGK_	Phospho (STY)	sp|O76021|RL1D1_HUMAN	1		_AVSETPAVPPVS(ph)EDEDDDDDDATPPPVIAPRPEHTK_	Phospho (STY)	sp|Q13153|PAK1_HUMAN	1		_DDGSSM(ox)SFYVRPS(ph)PAK_	Oxidation (M),Phospho (STY)	sp|Q9NYB0|TE2IP_HUMAN	1		_DRT(ph)PPHLLYSDR_	Phospho (STY)	sp|Q8NDT2|RB15B_HUMAN	1		_ENSFGS(ph)PLEFR_	Phospho (STY)	sp|Q9UQ35|SRRM2_HUMAN	1		_FNGGHSPT(ph)HS(ph)PEK_	2 Phospho (STY)	sp|Q9Y5K6|CD2AP_HUMAN	0.873		_GEEGS(ph)DDDETENGPKPK_	Phospho (STY)	sp|Q6PD62|CTR9_HUMAN	1		_HQAS(ph)DS(ph)ENEEPPKPR_	2 Phospho (STY)	sp|Q96ST2|IWS1_HUMAN	1
_ASS(ph)LEDLVLK_	Phospho (STY)	sp|Q15477|SKIV2_HUMAN	0.956		_CAPSAGS(ph)PAAAVGRES(ph)PGAAATSSSGPQAQQHR_	Phospho (STY)	sp|Q7L2J0|MEPCE_HUMAN	0.97		_ATPATAPGTS(ph)PR_	Phospho (STY)	sp|Q96P47|AGAP3_HUMAN	0.973		_AVT(ph)PVPTK_	Oxidation (M),Phospho (STY)	sp|Q6PKG0|LARP1_HUMAN	0.996		_DDKEEEEDGTGS(ph)PQLNNR_	Phospho (STY)	sp|P49407|ARRB1_HUMAN	0.96		_DRT(ph)PPLLYR_	Phospho (STY)	sp|Q96T37|RBM15_HUMAN	1		_ENSKREEEEQQEGGFAS(ph)PR_	Phospho (STY)	sp|Q96T88|UHRF1_HUMAN	1		_FRWNGM(ox)S(ph)R_	Oxidation (M),Phospho (STY)	sp|Q9HAV4|XPO5_HUMAN	1		_GEFSAS(ph)PM(ox)LK_	Oxidation (M),Phospho (STY)	sp|Q9UQ35|SRRM2_HUMAN	0.993		_HRPS(ph)PPAT(ph)PPPK_	2 Phospho (STY)	sp|Q8IYB3|SRRM1_HUMAN	1
_ASS(ph)LGEIDESSELR_	Phospho (STY)	sp|Q16513|PKN2_HUMAN	0.911		_CDILVQEELLAS(ph)PKK_	2 Phospho (STY)	sp|Q96JM3|CHAP1_HUMAN	1		_ATS(ph)PLVSLYPALECR_	Phospho (STY)	sp|Q96G74|OTUD5_HUMAN	0.811		_AVTIANS(ph)PSKPSEK_	Phospho (STY)	sp|Q8NEF9|SRFB1_HUMAN	0.999		_DDPDGKQEAKPQQAAGM(ox)LS(ph)PK_	Oxidation (M),Phospho (STY)	sp|Q13428|TCOF_HUMAN	1		_DS(ph)ELKTPPS(ph)VGPPSVTVVTLESAPSALEK_	2 Phospho (STY)	sp|Q96T58|MINT_HUMAN	0.811		_ENTT(ph)T(ph)IVFR_	2 Phospho (STY)	sp|P50748|KNTC1_HUMAN	0.97		_FS(ph)AS(ph)GELGNGNIK_	2 Phospho (STY)	sp|P12004|PCNA_HUMAN	1		_GEFSAS(ph)PMLK_	Phospho (STY)	sp|Q9UQ35|SRRM2_HUMAN	0.999		_HRRS(ph)PS(ph)VS(ph)S(ph)PEPAEK_	4 Phospho (STY)	sp|Q9UQ35|SRRM2_HUMAN	1
_ASS(ph)PFR_	Phospho (STY)	sp|Q14978|NOLC1_HUMAN	1		_CGGVEQASSS(ph)PR_	Phospho (STY)	sp|Q5VZL5|ZMYM4_HUMAN	0.911		_ATS(ph)PSSSVSGDFDDGHHSVSTPGPSR_	Phospho (STY)	sp|Q86U86|PB1_HUMAN	0.81		_AVTTVTQSTPVPGPSVPPPEELQVS(ph)PGPR_	Phospho (STY)	sp|P51610|HCFC1_HUMAN	1		_DDPDGKQEAKPQQAAGMLS(ph)PK_	Phospho (STY)	sp|Q13428|TCOF_HUMAN	1		_DSAIPVES(ph)DTDDEGAPR_	Phospho (STY)	sp|Q96D46|NMD3_HUMAN	0.909		_ENVEYIEREES(ph)DGEYDEFGR_	Phospho (STY)	sp|O95218|ZRAB2_HUMAN	1		_FSGEEGEIEDDES(ph)GTENR_	Phospho (STY)	sp|Q9Y2W1|TR150_HUMAN	0.994		_GESAEDKEHEEGRDS(ph)EEGPR_	Phospho (STY)	sp|Q7Z4V5|HDGR2_HUMAN	0.999		_HSDS(ph)IARS(ph)PCKS(ph)PK_	3 Phospho (STY)	sp|Q8WXF0|SRS12_HUMAN	0.998
_ASS(ph)PPDRIDIFGR_	Phospho (STY)	sp|Q9NWB6|ARGL1_HUMAN	0.977		_CGSGPVHISGQHLVAVEEDAES(ph)EDEEEEDVK_	Phospho (STY)	sp|P06748|NPM_HUMAN	1		_ATSDTLES(ph)PPK_	Phospho (STY)	sp|O94782|UBP1_HUMAN	0.999		_AVVLPGGTATS(ph)PK_	Phospho (STY)	sp|Q8N1G0|ZN687_HUMAN	0.805		_DEILPTT(ph)PISEQK_	Phospho (STY)	sp|P23396|RS3_HUMAN	0.989		_DSAIPVESDT(ph)DDEGAPR_	Phospho (STY)	sp|Q96D46|NMD3_HUMAN	0.992		_ENVEYIEREES(ph)DGEYDEFGRK_	Phospho (STY)	sp|O95218|ZRAB2_HUMAN	1		_FSGEEGEIEDDES(ph)GTENREEK_	Phospho (STY)	sp|Q9Y2W1|TR150_HUMAN	0.999		_GEVPPKET(ph)PK_	Phospho (STY)	sp|P49006|MRP_HUMAN	1		_HSDSIARS(ph)PCKS(ph)PK_	2 Phospho (STY)	sp|Q8WXF0|SRS12_HUMAN	0.981
_ASS(ph)PSPLTIGTPESQR_	Phospho (STY)	sp|Q9NPI6|DCP1A_HUMAN	0.85		_CIACQAAKLS(ph)PR_	Phospho (STY)	sp|P49790|NU153_HUMAN	1		_ATSS(ph)SSGSLSATGR_	Phospho (STY)	sp|Q03252|LMNB2_HUMAN	0.866		_AVVVS(ph)PKEENK_	Phospho (STY)	sp|O75909|CCNK_HUMAN	1		_DELAELS(ph)EAES(ph)EGDEKPK_	2 Phospho (STY)	sp|Q3L8U1|CHD9_HUMAN	1		_DSALAEAPEGLS(ph)PAPPAR_	Phospho (STY)	sp|Q9H9J4|UBP42_HUMAN	1		_EPAITSQNS(ph)PEAR_	Phospho (STY)	sp|P23193|TCEA1_HUMAN	0.926		_FSKEEPVS(ph)S(ph)GPEEAVGK_	2 Phospho (STY)	sp|O00567|NOP56_HUMAN	1		_GFGDGYNGYGGGPGGGNFGGS(ph)PGYGGGR_	Phospho (STY)	sp|P22626|ROA2_HUMAN	1		_HSS(ph)IS(ph)PSTLTLK_	2 Phospho (STY)	sp|Q14004|CDK13_HUMAN	0.971
_ASSLSES(ph)SPPK_	Phospho (STY)	sp|Q9UHB6|LIMA1_HUMAN	0.892		_CNRGWTALHESVS(ph)R_	2 Phospho (STY)	sp|Q96Q27|ASB2_HUMAN	0.996		_ATSSS(ph)NPSS(ph)PAPDWYK_	2 Phospho (STY)	sp|P46100|ATRX_HUMAN	0.882		_AYS(ph)PEYR_	2 Phospho (STY)	sp|Q9UDY2|ZO2_HUMAN	1		_DELHIVEAEAM(ox)NYEGS(ph)PIK_	Oxidation (M),Phospho (STY)	sp|P06748|NPM_HUMAN	1		_DSDQVAQS(ph)DGEESPAAEEQLLGEHIK_	Phospho (STY)	sp|O94979|SC31A_HUMAN	1		_EPHS(ph)PADQPEQQAESTLTSAETR_	Phospho (STY)	sp|Q9H2Y7|ZN106_HUMAN	1		_FTDKDQQPS(ph)GS(ph)EGEDDDAEAALKK_	2 Phospho (STY)	sp|Q9NXG2|THUM1_HUMAN	1		_GGDSIGET(ph)PTPGASK_	Phospho (STY)	sp|O75533|SF3B1_HUMAN	0.982		_HTGPNS(ph)PDTANDGFVR_	Phospho (STY)	sp|P31943|HNRH1_HUMAN	0.997
_ASSPS(ph)PLTIGTPESQR_	Phospho (STY)	sp|Q9NPI6|DCP1A_HUMAN	0.998		_CRS(ph)PGM(ox)LEPLGSSR_	Phospho (STY)	sp|Q9UQ35|SRRM2_HUMAN	1		_ATSSSSGS(ph)LSATGR_	Phospho (STY)	sp|Q03252|LMNB2_HUMAN	0.827		_AYT(ph)PVVVTQWYR_	Oxidation (M),Phospho (STY)	sp|Q9UQ88|CD11A_HUMAN	0.933		_DELTES(ph)PK_	Phospho (STY)	sp|Q8NC51|PAIRB_HUMAN	0.984		_DSENLAS(ph)PSEYPENGER_	Phospho (STY)	sp|P52948|NUP98_HUMAN	0.999		_EQDRVHS(ph)PCPTSGSEK_	Phospho (STY)	sp|Q96LT9|RBM40_HUMAN	1		_GAAEEAELEDS(ph)DDEEKPVK_	Phospho (STY)	sp|Q9UBB9|TFP11_HUMAN	1		_GGEFDEFVNDDT(ph)DDDLPISK_	Phospho (STY)	sp|Q6PD62|CTR9_HUMAN	1		_IAAPELHKGDS(ph)DS(ph)EEDEPTK_	2 Phospho (STY)	sp|Q92733|PRCC_HUMAN	1
_ASSSGPRS(ph)PLDQR_	Phospho (STY)	sp|O14646|CHD1_HUMAN	1		_CRS(ph)PGMLEPLGSSR_	Phospho (STY)	sp|Q9UQ35|SRRM2_HUMAN	1		_ATSSSSGSLS(ph)ATGR_	Phospho (STY)	sp|Q03252|LMNB2_HUMAN	0.814		_CAPSAGS(ph)PAAAVGRES(ph)PGAAATSSSGPQAQQHR_	2 Phospho (STY)	sp|Q7L2J0|MEPCE_HUMAN	0.913		_DFQDYM(ox)EPEEGCQGS(ph)PQRR_	Oxidation (M),Phospho (STY)	sp|O43237|DC1L2_HUMAN	1		_DSENLASPS(ph)EYPENGER_	Phospho (STY)	sp|P52948|NUP98_HUMAN	0.834		_EQS(ph)EVSVSPR_	Phospho (STY)	sp|Q7L4I2|RSRC2_HUMAN	1		_GAAEEAELEDS(ph)DDEEKPVKQDDFPK_	Phospho (STY)	sp|Q9UBB9|TFP11_HUMAN	1		_GGNVFAALIQDQS(ph)EEEEEEEK_	Phospho (STY)	sp|Q8NE71|ABCF1_HUMAN	1		_IASNT(ph)QS(ph)RR_	2 Phospho (STY)	sp|P36222|CH3L1_HUMAN	1
_ASSVSTKES(ph)PAR_	Phospho (STY)	sp|Q13428|TCOF_HUMAN	0.993		_CS(ph)PLEPDFVPDEK_	Phospho (STY)	sp|Q5JSZ5|PRC2B_HUMAN	1		_ATVT(ph)PS(ph)PVK_	2 Phospho (STY)	sp|Q9H1E3|NUCKS_HUMAN	1		_CGSGPVHISGQHLVAVEEDAES(ph)EDEEEEDVK_	Phospho (STY)	sp|P06748|NPM_HUMAN	1		_DFQDYMEPEEGCQGS(ph)PQRR_	Phospho (STY)	sp|O43237|DC1L2_HUMAN	1		_DSGRGDS(ph)VSDSGSDALR_	Phospho (STY)	sp|Q53EL6|PDCD4_HUMAN	0.995		_EQYVPPRS(ph)PK_	Phospho (STY)	sp|Q71RC2|LARP4_HUMAN	1		_GAASTLVPGVSETSAS(ph)PGS(ph)PSVR_	2 Phospho (STY)	sp|Q6ZRS2|SRCAP_HUMAN	0.822		_GGPEGVAAQAVASAASAGPADAEM(ox)EEIFDDAS(ph)PGK_	Oxidation (M),Phospho (STY)	sp|O60264|SMCA5_HUMAN	1		_IDASKNEEDEGHS(ph)NS(ph)SPR_	2 Phospho (STY)	sp|Q14103|HNRPD_HUMAN	0.972
_ASSVSTKES(ph)PARK_	Phospho (STY)	sp|Q13428|TCOF_HUMAN	0.999		_CS(ph)YCNMYFSPNK_	2 Phospho (STY)	sp|Q2VWA4|SKOR2_HUMAN	0.963		_ATVTPS(ph)PVK_	Phospho (STY)	sp|Q9H1E3|NUCKS_HUMAN	1		_CIACQAAKLS(ph)PR_	Phospho (STY)	sp|P49790|NU153_HUMAN	1		_DFQEYVEPGEDFPAS(ph)PQR_	Phospho (STY)	sp|Q9Y6G9|DC1L1_HUMAN	1		_DSISAVSSEKVS(ph)PSK_	Phospho (STY)	sp|P46821|MAP1B_HUMAN	0.979		_ERDHS(ph)PTPSVFNSDEER_	Phospho (STY)	sp|Q6UN15|FIP1_HUMAN	0.921		_GADNDGS(ph)GSESGYTTPK_	Phospho (STY)	sp|Q7Z417|NUFP2_HUMAN	0.979		_GGSISVQVNSIKFDS(ph)E_	Phospho (STY)	sp|Q14978|NOLC1_HUMAN	0.999		_IDASKNEEDEGHS(ph)NSS(ph)PR_	2 Phospho (STY)	sp|Q14103|HNRPD_HUMAN	0.972
_ASTAS(ph)PCNNNINAATAVALQEPR_	Phospho (STY)	sp|Q71RC2|LARP4_HUMAN	0.822		_CSS(ph)VTGVQR_	Phospho (STY)	sp|O60343|TBCD4_HUMAN	0.999		_AVAS(ph)PEATVSQTDENK_	Phospho (STY)	sp|Q641Q2|FA21A_HUMAN	1		_CRS(ph)PGM(ox)LEPLGSSR_	Oxidation (M),3 Phospho (STY)	sp|Q9UQ35|SRRM2_HUMAN	1		_DFQEYVEPGEDFPAS(ph)PQRR_	Phospho (STY)	sp|Q9Y6G9|DC1L1_HUMAN	1		_DSLGDFIEHYAQLGPSS(ph)PEQLAAGAEEGGGPR_	Phospho (STY)	sp|Q96QR8|PURB_HUMAN	0.935		_ERDKEVS(ph)DDEAEEK_	Phospho (STY)	sp|P07900|HS90A_HUMAN	1		_GAEAFGDS(ph)EEDGEDVFEVEK_	Phospho (STY)	sp|Q99549|MPP8_HUMAN	1		_GHLSRPEAQSLS(ph)PYTTSANR_	Phospho (STY)	sp|O94776|MTA2_HUMAN	0.98		_IDASKNEEDEGHSNS(ph)SPR_	Phospho (STY)	sp|Q14103|HNRPD_HUMAN	0.941
_ASTSDYQVISDRQT(ph)PK_	Oxidation (M),Phospho (STY)	sp|Q8NFH5|NUP53_HUMAN	1		_CTLPEHES(ph)PSQDISDACEAESTER_	Phospho (STY)	sp|Q32MZ4|LRRF1_HUMAN	0.973		_AVEES(ph)S(ph)DEERQR_	2 Phospho (STY)	sp|Q9BW71|HIRP3_HUMAN	1		_CRS(ph)PGMLEPLGSSR_	2 Phospho (STY)	sp|Q9UQ35|SRRM2_HUMAN	1		_DGDKS(ph)PMSSLQISNEK_	Phospho (STY)	sp|Q9UER7|DAXX_HUMAN	0.988		_DSQDAS(ph)AEQSDHDDEVASLASASGGFGTK_	Phospho (STY)	sp|Q6P2E9|EDC4_HUMAN	0.993		_EREDS(ph)GDAEAHAFK_	Phospho (STY)	sp|Q9NPI1|BRD7_HUMAN	1		_GAGDGS(ph)DEEVDGK_	Phospho (STY)	sp|P35579|MYH9_HUMAN	1		_GHYEVTGS(ph)DDETGK_	Phospho (STY)	sp|Q09666|AHNK_HUMAN	1		_IDASKNEEDEGHSNSS(ph)PR_	Phospho (STY)	sp|Q14103|HNRPD_HUMAN	0.936
_ASTTSLSGS(ph)DSETEGK_	Phospho (STY)	sp|Q8N1G2|CMTR1_HUMAN	0.804		_CTLPEHESPS(ph)QDISDACEAESTER_	2 Phospho (STY)	sp|Q32MZ4|LRRF1_HUMAN	0.854		_AVIVS(ph)SPK_	Phospho (STY)	sp|Q14966|ZN638_HUMAN	0.948		_CS(ph)PLEPDFVPDEK_	Oxidation (M),Phospho (STY)	sp|Q5JSZ5|PRC2B_HUMAN	1		_DGEGT(ph)EEGEK_	Phospho (STY)	sp|P23470|PTPRG_HUMAN	1		_DSQDASAEQS(ph)DHDDEVASLASASGGFGTK_	Phospho (STY)	sp|Q6P2E9|EDC4_HUMAN	0.82		_EREDSGDAEAHAFKS(ph)PSK_	Phospho (STY)	sp|Q9NPI1|BRD7_HUMAN	0.956		_GAGDGS(ph)DEEVDGKADGAEAKPAE_	Phospho (STY)	sp|P35579|MYH9_HUMAN	1		_GIASTSDPPTANIKPT(ph)PVVSTPSK_	Phospho (STY)	sp|P12270|TPR_HUMAN	0.889		_IDDRDS(ph)DEEGASDR_	Phospho (STY)	sp|Q8TDD1|DDX54_HUMAN	1
_ASVS(ph)GPNS(ph)PSETRR_	Phospho (STY)	sp|O15344|TRI18_HUMAN	0.949		_DAAAHLQTSHKPSAEDAEGQS(ph)PLSQK_	Phospho (STY)	sp|Q96F24|NRBF2_HUMAN	0.987		_AVLSDS(ph)PQLSEGK_	Phospho (STY)	sp|Q7Z4H7|HAUS6_HUMAN	1		_CSGPGLS(ph)PGMVR_	Phospho (STY)	sp|P21333|FLNA_HUMAN	1		_DGETLEGS(ph)DAEESLDK_	Phospho (STY)	sp|Q9P2D1|CHD7_HUMAN	1		_DSSDSADGRAT(ph)PSENLVPSSAR_	Phospho (STY)	sp|Q8N684|CPSF7_HUMAN	0.985		_EREES(ph)EDELEEANGNNPIDIEVDQNK_	Phospho (STY)	sp|Q9UKL0|RCOR1_HUMAN	1		_GAPS(ph)SPATGVLPS(ph)PQGK_	2 Phospho (STY)	sp|Q5SRE5|NU188_HUMAN	0.912		_GIPLATGDTS(ph)PEPELLPGAPLPPPK_	Phospho (STY)	sp|O75821|EIF3G_HUMAN	0.974		_IDENS(ph)DKEM(ox)EVEES(ph)PEK_	Oxidation (M),2 Phospho (STY)	sp|Q8N3X1|FNBP4_HUMAN	1
_ASVS(ph)PM(ox)DEPVPDSESPIEK_	Phospho (STY)	sp|P46821|MAP1B_HUMAN	0.934		_DAASKPSGEGSFSKPGDGGS(ph)PSKPSDHEPPK_	Phospho (STY)	sp|O14654|IRS4_HUMAN	0.925		_AVPIAVADEGES(ph)ES(ph)EDDDLKPR_	2 Phospho (STY)	sp|Q9Y2K6|UBP20_HUMAN	1		_CTLPEHES(ph)PSQDISDACEAESTER_	Phospho (STY)	sp|Q32MZ4|LRRF1_HUMAN	0.964		_DGGS(ph)GNS(ph)TIIVSR_	2 Phospho (STY)	sp|Q7Z6Z7|HUWE1_HUMAN	0.886		_DTDGGPKEEES(ph)PV_	Phospho (STY)	sp|P53985|MOT1_HUMAN	1		_ERFS(ph)PPRHELS(ph)PPQK_	2 Phospho (STY)	sp|Q9BXP5|SRRT_HUMAN	1		_GAPSS(ph)PATGVLPS(ph)PQGK_	2 Phospho (STY)	sp|Q5SRE5|NU188_HUMAN	0.922		_GKEELAEAEIIKDSPDS(ph)PEPPNK_	Phospho (STY)	sp|Q9NVM9|ASUN_HUMAN	0.993		_IDENS(ph)DKEMEVEES(ph)PEK_	2 Phospho (STY)	sp|Q8N3X1|FNBP4_HUMAN	1
_ASVSGPNS(ph)PSETRR_	Phospho (STY)	sp|O15344|TRI18_HUMAN	0.988		_DADLS(ph)PVNASIIK_	Phospho (STY)	sp|O75970|MPDZ_HUMAN	1		_AVPPVS(ph)PELR_	Phospho (STY)	sp|Q96JM3|CHAP1_HUMAN	1		_DAAAHLQTSHKPSAEDAEGQS(ph)PLSQK_	Phospho (STY)	sp|Q96F24|NRBF2_HUMAN	0.997		_DGGS(ph)GNST(ph)IIVSR_	2 Phospho (STY)	sp|Q7Z6Z7|HUWE1_HUMAN	0.967		_DTFEHDPSES(ph)IDEFNK_	Phospho (STY)	sp|Q9NYF8|BCLF1_HUMAN	0.998		_ERRT(ph)PS(ph)DDEEDNLFAPPK_	2 Phospho (STY)	sp|Q9Y4E1|FA21C_HUMAN	1		_GAVAAEGAS(ph)DTEREEPTESQGLAAR_	Phospho (STY)	sp|Q9P1Y6|PHRF1_HUMAN	0.823		_GKGS(ph)PRPQAPK_	Phospho (STY)	sp|Q14978|NOLC1_HUMAN	1		_IDIS(ph)PSTFR_	Phospho (STY)	sp|Q9Y2W1|TR150_HUMAN	0.999
_ASVSQT(ph)SPQSASSPR_	Phospho (STY)	sp|Q8TDY2|RBCC1_HUMAN	0.951		_DAESVECPDADS(ph)LNIPDVDEEGYSIKPETNQNDTK_	Phospho (STY)	sp|Q0JRZ9|FCHO2_HUMAN	0.872		_AVSETPAVPPVS(ph)EDEDDDDDDATPPPVIAPRPEHTK_	Phospho (STY)	sp|Q13153|PAK1_HUMAN	1		_DAASKPSGEGSFSKPGDGGSPS(ph)KPSDHEPPK_	Phospho (STY)	sp|O14654|IRS4_HUMAN	0.92		_DGGS(ph)GNSTIIVSR_	Phospho (STY)	sp|Q7Z6Z7|HUWE1_HUMAN	1		_DTFM(ox)T(ph)ELLNRVDK_	Oxidation (M),Phospho (STY)	sp|O14513|NCKP5_HUMAN	0.904		_ERS(ph)PALKS(ph)PLQSVVVR_	2 Phospho (STY)	sp|Q9Y2W1|TR150_HUMAN	1		_GDQPAASGDS(ph)DDDEPPPLPR_	Phospho (STY)	sp|O00264|PGRC1_HUMAN	1		_GKS(ph)PVPKS(ph)PVEEK_	2 Phospho (STY)	sp|P07197|NFM_HUMAN	1		_IDIS(ph)PSTLR_	Phospho (STY)	sp|Q9NYF8|BCLF1_HUMAN	0.889
_AT(ph)NESEDEIPQLVPIGK_	Phospho (STY)	sp|O76021|RL1D1_HUMAN	0.823		_DAEYIYPSLES(ph)DDDDPALK_	Oxidation (M),Phospho (STY)	sp|Q9UPP1|PHF8_HUMAN	1		_AVSPPHLDGPPS(ph)PR_	Phospho (STY)	sp|P29590|PML_HUMAN	1		_DADLS(ph)PVNASIIK_	Phospho (STY)	sp|O75970|MPDZ_HUMAN	1		_DGKFS(ph)PIQEK_	Phospho (STY)	sp|O43683|BUB1_HUMAN	1		_DTGSEVPSGSGHGPCT(ph)PPPAPANFEDVAPTGSGEPGATRES(ph)PK_	2 Phospho (STY)	sp|O15047|SET1A_HUMAN	0.847		_ERS(ph)PALKSPLQS(ph)VVVR_	2 Phospho (STY)	sp|Q9Y2W1|TR150_HUMAN	0.923		_GDS(ph)ES(ph)EEDEDLEVPVPSR_	2 Phospho (STY)	sp|P13861|KAP2_HUMAN	1		_GKS(ph)PVSKS(ph)PVEEK_	2 Phospho (STY)	sp|P07197|NFM_HUMAN	0.998		_IEDVGS(ph)DEEDDS(ph)GKDKK_	2 Phospho (STY)	sp|P08238|HS90B_HUMAN	1
_ATAPQT(ph)QHVSPM(ox)R_	Phospho (STY)	sp|P29692|EF1D_HUMAN	0.999		_DAGGPRPES(ph)PVPAGR_	Phospho (STY)	sp|Q9BVG9|PTSS2_HUMAN	1		_AVSTVVVTTAPS(ph)PK_	Phospho (STY)	sp|Q6P4R8|NFRKB_HUMAN	0.994		_DAEYIYPSLES(ph)DDDDPALK_	Phospho (STY)	sp|Q9UPP1|PHF8_HUMAN	1		_DGLAPEKT(ph)SPDRDK_	Phospho (STY)	sp|Q7L4I2|RSRC2_HUMAN	0.851		_DTIIDVVGAPLT(ph)PNSR_	Phospho (STY)	sp|Q9NPF5|DMAP1_HUMAN	0.943		_ERSDS(ph)GGSSSEPFDR_	Phospho (STY)	sp|P48634|PRC2A_HUMAN	0.991		_GDVTAEEAAGAS(ph)PAK_	Phospho (STY)	sp|P49006|MRP_HUMAN	1		_GKY(ph)LPS(ph)LEM(ox)FRQR_	Oxidation (M),2 Phospho (STY)	sp|Q9Y5A6|ZSC21_HUMAN	1		_IEDVGS(ph)DEEDDSGK_	Phospho (STY)	sp|P08238|HS90B_HUMAN	1
_ATAPQTQHVS(ph)PM(ox)R_	Phospho (STY)	sp|P29692|EF1D_HUMAN	1		_DALGDSLQVPVS(ph)PSSTTSSR_	Phospho (STY)	sp|Q9Y2D5|AKAP2_HUMAN	0.975		_AVT(ph)PVPTK_	Phospho (STY)	sp|Q6PKG0|LARP1_HUMAN	0.999		_DALGDSLQVPVS(ph)PSSTTSSR_	Phospho (STY)	sp|Q9Y2D5|AKAP2_HUMAN	0.862		_DGLAPEKTS(ph)PDRDK_	Phospho (STY)	sp|Q7L4I2|RSRC2_HUMAN	0.965		_DTS(ph)GLER_	Phospho (STY)	sp|Q9H307|PININ_HUMAN	1		_ERSNIYGKT(ph)FT(ph)LGK_	2 Phospho (STY)	sp|Q96SR6|ZN382_HUMAN	0.999		_GEAAAERPGEAAVAS(ph)SPSK_	Phospho (STY)	sp|P29966|MARCS_HUMAN	0.846		_GLAEVQQDGEAEEGATS(ph)DGEK_	Phospho (STY)	sp|Q02952|AKA12_HUMAN	0.998		_IEDVGS(ph)DEEDDSGKDK_	Phospho (STY)	sp|P08238|HS90B_HUMAN	1
_ATAPQTQHVS(ph)PMR_	2 Oxidation (M),Phospho (STY)	sp|P29692|EF1D_HUMAN	1		_DAPIS(ph)PASIASSSSTPSSK_	Phospho (STY)	sp|Q04727|TLE4_HUMAN	1		_AVTIANS(ph)PSKPSEK_	Phospho (STY)	sp|Q8NEF9|SRFB1_HUMAN	1		_DAPIS(ph)PASIASSSSTPSSK_	Phospho (STY)	sp|Q04727|TLE4_HUMAN	0.999		_DGLNQTTIPVS(ph)PPSTTKPSR_	Phospho (STY)	sp|Q71RC2|LARP4_HUMAN	0.971		_DTS(ph)PSSGSAVSSSK_	Phospho (STY)	sp|Q8NEY8|PPHLN_HUMAN	0.998		_ES(ph)EQESEEEILAQK_	Phospho (STY)	sp|Q9BW71|HIRP3_HUMAN	0.989		_GEEGS(ph)DDDETENGPKPK_	Phospho (STY)	sp|Q6PD62|CTR9_HUMAN	1		_GLFS(ph)DEEDSEDLFSSQSASK_	Phospho (STY)	sp|Q641Q2|FA21A_HUMAN	1		_IEEVLS(ph)PEGS(ph)PS(ph)KSPSKK_	3 Phospho (STY)	sp|Q9UEY8|ADDG_HUMAN	0.96
_ATDGDLAQEPGPGLTFEDS(ph)GNPKSPDK_	Phospho (STY)	sp|O15417|TNC18_HUMAN	0.956		_DAPTS(ph)PASVASSSSTPSSK_	Phospho (STY)	sp|Q04726|TLE3_HUMAN	0.997		_AVTTVTQSTPVPGPSVPPPEELQVS(ph)PGPR_	Phospho (STY)	sp|P51610|HCFC1_HUMAN	1		_DAPTS(ph)PASVASSSSTPSSK_	Phospho (STY)	sp|Q04726|TLE3_HUMAN	0.986		_DGLPRT(ph)PSRR_	Phospho (STY)	sp|Q9UQ35|SRRM2_HUMAN	1		_DTSATSQSVNGS(ph)PQAEQPSLESTSK_	Phospho (STY)	sp|Q86WB0|NIPA_HUMAN	0.999		_ES(ph)EQESEEEILAQKK_	Phospho (STY)	sp|Q9BW71|HIRP3_HUMAN	0.996		_GEFSAS(ph)PM(ox)LK_	Oxidation (M),Phospho (STY)	sp|Q9UQ35|SRRM2_HUMAN	0.999		_GLFS(ph)DEEDSEDLFSSQSASNLK_	Phospho (STY)	sp|Q9Y4E1|FA21C_HUMAN	1		_IEEVLS(ph)PEGS(ph)PSKS(ph)PSK_	3 Phospho (STY)	sp|Q9UEY8|ADDG_HUMAN	0.985
_ATDGDLAQEPGPGLTFEDSGNPKS(ph)PDK_	Phospho (STY)	sp|O15417|TNC18_HUMAN	0.884		_DAQRLS(ph)PIPEEVPK_	Phospho (STY)	sp|Q96T23|RSF1_HUMAN	1		_AVVLPGGTAT(ph)SPK_	Phospho (STY)	sp|Q8N1G0|ZN687_HUMAN	0.876		_DAQRLS(ph)PIPEEVPK_	Phospho (STY)	sp|Q96T23|RSF1_HUMAN	1		_DGPGLERS(ph)PGEPGGAAPER_	Phospho (STY)	sp|Q96EB6|SIR1_HUMAN	1		_DTSPDKGELVS(ph)DEEEDT_	Phospho (STY)	sp|Q9UPU7|TBD2B_HUMAN	1		_ESDKEDGRES(ph)PSYDTPSQR_	Phospho (STY)	sp|Q9Y6M7|S4A7_HUMAN	0.992		_GEGDAPFSEPGTTSTQRPS(ph)S(ph)PETATK_	2 Phospho (STY)	sp|Q9UQ35|SRRM2_HUMAN	0.971		_GLLYDS(ph)DEEDEERPAR_	Phospho (STY)	sp|P49736|MCM2_HUMAN	1		_IEEVLSPEGS(ph)PSKS(ph)PSK_	2 Phospho (STY)	sp|Q9UEY8|ADDG_HUMAN	0.983
_ATDIPAS(ph)ASPPPVAGVPFFK_	Phospho (STY)	sp|Q8N1G0|ZN687_HUMAN	0.863		_DAS(ph)PINR_	Phospho (STY)	sp|Q13523|PRP4B_HUMAN	1		_AVVLPGGTATS(ph)PK_	Phospho (STY)	sp|Q8N1G0|ZN687_HUMAN	0.892		_DAS(ph)PINRWS(ph)PTR_	Phospho (STY)	sp|Q13523|PRP4B_HUMAN	1		_DGQDAIAQS(ph)PEK_	Phospho (STY)	sp|Q9NWH9|SLTM_HUMAN	1		_DTTVISHS(ph)PNTSYDTALEAR_	Phospho (STY)	sp|Q4VCS5|AMOT_HUMAN	1		_ESDQTLAALLS(ph)PK_	Phospho (STY)	sp|P18583|SON_HUMAN	0.999		_GEIGGLSLS(ph)PS(ph)PER_	2 Phospho (STY)	sp|Q96GP6|SREC2_HUMAN	0.908		_GLLYDS(ph)DEEDEERPARK_	Phospho (STY)	sp|P49736|MCM2_HUMAN	1		_IES(ph)DEEEDFENVGK_	Phospho (STY)	sp|Q96T23|RSF1_HUMAN	1
_ATDIPASAS(ph)PPPVAGVPFFK_	Phospho (STY)	sp|Q8N1G0|ZN687_HUMAN	0.938		_DAS(ph)PINRWS(ph)PTR_	Phospho (STY)	sp|Q13523|PRP4B_HUMAN	1		_AVVVS(ph)PKEENK_	Phospho (STY)	sp|O75909|CCNK_HUMAN	1		_DASSS(ph)PASTASSASSTSLK_	Phospho (STY)	sp|Q04724|TLE1_HUMAN	0.975		_DGQVINET(ph)SQHHDDLE_	Phospho (STY)	sp|P08670|VIME_HUMAN	0.833		_DVEDM(ox)ELS(ph)DVEDDGSK_	Oxidation (M),Phospho (STY)	sp|Q5VT52|RPRD2_HUMAN	1		_ESEDDLNKES(ph)EEEVGPTK_	Phospho (STY)	sp|O43719|HTSF1_HUMAN	1		_GEPNVS(ph)YICSR_	Phospho (STY)	sp|P49841|GSK3B_HUMAN	0.827		_GLPLGSAVSS(ph)PVLFS(ph)PVGR_	2 Phospho (STY)	sp|Q8WUM0|NU133_HUMAN	0.909		_IEVKEES(ph)PQS(ph)K_	2 Phospho (STY)	sp|P11171|41_HUMAN	1
_ATEDGEEDEVS(ph)AGEK_	Phospho (STY)	sp|Q9BXW9|FACD2_HUMAN	1		_DAS(ph)PTPSTDAEYPANGSGADR_	Oxidation (M),Phospho (STY)	sp|O43639|NCK2_HUMAN	0.916		_AYRPPS(ph)GEK_	Phospho (STY)	sp|P30414|NKTR_HUMAN	1		_DDAT(ph)PVRDEPMDAESITFK_	2 Phospho (STY)	sp|Q7Z6E9|RBBP6_HUMAN	1		_DGQVINETS(ph)QHHDDLE_	Phospho (STY)	sp|P08670|VIME_HUMAN	0.866		_DVEDMELS(ph)DVEDDGSK_	Phospho (STY)	sp|Q5VT52|RPRD2_HUMAN	1		_ESEDKPEIEDVGS(ph)DEEEEK_	Phospho (STY)	sp|P07900|HS90A_HUMAN	1		_GEPNVSY(ph)ICSR_	Phospho (STY)	sp|P49841|GSK3B_HUMAN	0.85		_GNAEGS(ph)S(ph)DEEGKLVIDEPAK_	2 Phospho (STY)	sp|P51858|HDGF_HUMAN	1		_IEVKEES(ph)PQS(ph)KAETELK_	2 Phospho (STY)	sp|P11171|41_HUMAN	0.994
_ATEETGQAQSGQANCQGLS(ph)PVSVASK_	Phospho (STY)	sp|Q9UHF7|TRPS1_HUMAN	0.943		_DASPT(ph)PSTDAEYPANGSGADR_	Phospho (STY)	sp|O43639|NCK2_HUMAN	0.843		_AYS(ph)PEYR_	Phospho (STY)	sp|Q9UDY2|ZO2_HUMAN	1		_DDEEKPKIEDVGS(ph)DEEDDSGK_	2 Phospho (STY)	sp|P08238|HS90B_HUMAN	1		_DGSS(ph)PPLLEK_	Phospho (STY)	sp|Q6W2J9|BCOR_HUMAN	0.999		_DVT(ph)PPPETEVVLIK_	Phospho (STY)	sp|P27816|MAP4_HUMAN	1		_ESEDKPEIEDVGS(ph)DEEEEKK_	Phospho (STY)	sp|P07900|HS90A_HUMAN	1		_GEQVSQNGLPAEQGS(ph)PR_	Phospho (STY)	sp|Q01082|SPTB2_HUMAN	1		_GNDPLTSS(ph)PGR_	Phospho (STY)	sp|P49736|MCM2_HUMAN	0.997		_IGEGTY(ph)GVVYK_	Phospho (STY)	sp|P06493|CDK1_HUMAN	0.951
_ATGGLCLLGAYADS(ph)DDDDNDVSEK_	2 Phospho (STY)	sp|Q8N3X1|FNBP4_HUMAN	1		_DASS(ph)SPASTASSASSTSLK_	Phospho (STY)	sp|Q04724|TLE1_HUMAN	0.849		_CAPSAGS(ph)PAAAVGRES(ph)PGAAATSSSGPQAQQHR_	2 Phospho (STY)	sp|Q7L2J0|MEPCE_HUMAN	0.988		_DDFES(ph)EEEDVK_	2 Phospho (STY)	sp|Q7Z6E9|RBBP6_HUMAN	1		_DGTAPPPQSPGSPGTGQDEEWS(ph)DEESPRK_	Phospho (STY)	sp|Q9UKS6|PACN3_HUMAN	0.985		_DVTLS(ph)PVK_	Phospho (STY)	sp|Q8NFC6|BD1L1_HUMAN	0.999		_ESEDKPEIEDVGS(ph)DEEEEKKDGDK_	Phospho (STY)	sp|P07900|HS90A_HUMAN	1		_GFGDGYNGYGGGPGGGNFGGS(ph)PGYGGGR_	Phospho (STY)	sp|P22626|ROA2_HUMAN	1		_GNIETTSEDGQVFS(ph)PKK_	Phospho (STY)	sp|Q5T200|ZC3HD_HUMAN	1		_IPRPSVS(ph)QGCS(ph)R_	2 Phospho (STY)	sp|O75122|CLAP2_HUMAN	0.987
_ATIS(ph)DEEIER_	Phospho (STY)	sp|Q9UQN3|CHM2B_HUMAN	1		_DASSS(ph)PASTASSASSTSLK_	Phospho (STY)	sp|Q04724|TLE1_HUMAN	0.887		_CDS(ph)T(ph)QPLLAGLT(ph)PS(ph)PK_	4 Phospho (STY)	sp|Q99062|CSF3R_HUMAN	1		_DDPDGKQEAKPQQAAGM(ox)LS(ph)PK_	3 Phospho (STY)	sp|Q13428|TCOF_HUMAN	1		_DGTS(ph)PEEEIEIER_	Phospho (STY)	sp|Q9H501|ESF1_HUMAN	0.967		_DVTNFTVGGFAPM(ox)S(ph)PR_	Oxidation (M),Phospho (STY)	sp|O00267|SPT5H_HUMAN	1		_ESEEGNPVRGS(ph)EEDS(ph)PKK_	2 Phospho (STY)	sp|O43719|HTSF1_HUMAN	1		_GGDSIGET(ph)PT(ph)PGAS(ph)K_	3 Phospho (STY)	sp|O75533|SF3B1_HUMAN	1		_GNTQT(ph)S(ph)KVS(ph)S(ph)LQAEPLPR_	4 Phospho (STY)	sp|Q9H2M9|RBGPR_HUMAN	0.969		_IQEQES(ph)S(ph)GEEDSDLSPEEREK_	2 Phospho (STY)	sp|Q6NXS1|IPP2M_HUMAN	0.995
_ATLPS(ph)PDKLPGFK_	Oxidation (M),Phospho (STY)	sp|P22314|UBA1_HUMAN	0.998		_DASTS(ph)PPNRETIGSAQCK_	Phospho (STY)	sp|Q15154|PCM1_HUMAN	0.822		_CGSGPVHISGQHLVAVEEDAES(ph)EDEEEEDVK_	Phospho (STY)	sp|P06748|NPM_HUMAN	1		_DDPDGKQEAKPQQAAGMLS(ph)PK_	2 Phospho (STY)	sp|Q13428|TCOF_HUMAN	1		_DGVLTLANNVT(ph)PAK_	Phospho (STY)	sp|P27816|MAP4_HUMAN	1		_DVTNFTVGGFAPMS(ph)PR_	Phospho (STY)	sp|O00267|SPT5H_HUMAN	1		_ESEEGNPVRGSEEDS(ph)PKK_	Phospho (STY)	sp|O43719|HTSF1_HUMAN	1		_GGDSIGET(ph)PT(ph)PGASK_	2 Phospho (STY)	sp|O75533|SF3B1_HUMAN	1		_GPGAPGLAHLQES(ph)QAGSDTDVEEGK_	Phospho (STY)	sp|Q14676|MDC1_HUMAN	0.954		_IRHDS(ph)S(ph)DTS(ph)PPR_	3 Phospho (STY)	sp|Q9BRD0|BUD13_HUMAN	0.822
_ATNES(ph)EDEIPQLVPIGK_	Phospho (STY)	sp|O76021|RL1D1_HUMAN	0.998		_DCEYQQISPGAAPLPAS(ph)PGAR_	Phospho (STY)	sp|Q9NUE0|ZDH18_HUMAN	1		_CIACQAAKLS(ph)PR_	Phospho (STY)	sp|P49790|NU153_HUMAN	1		_DEILPTT(ph)PISEQK_	Phospho (STY)	sp|P23396|RS3_HUMAN	0.996		_DGYGGS(ph)RDSYSSSR_	Phospho (STY)	sp|P38159|RBMX_HUMAN	0.839		_DVYLS(ph)PR_	Phospho (STY)	sp|P38159|RBMX_HUMAN	1		_ESEQES(ph)EEEILAQKK_	Phospho (STY)	sp|Q9BW71|HIRP3_HUMAN	0.841		_GGRS(ph)RS(ph)S(ph)SPVTELASR_	3 Phospho (STY)	sp|Q9UQ35|SRRM2_HUMAN	0.864		_GPPDFS(ph)S(ph)DEEREPTPVLGSGAAAAGR_	2 Phospho (STY)	sp|P42166|LAP2A_HUMAN	1		_IS(ph)DS(ph)ESEDPPR_	2 Phospho (STY)	sp|Q96ST2|IWS1_HUMAN	1
_ATNS(ph)PKPHM(ox)VPR_	Phospho (STY)	sp|O75179|ANR17_HUMAN	0.998		_DCIHEHLS(ph)GDEFEK_	Phospho (STY)	sp|A0AVK6|E2F8_HUMAN	1		_CNFFS(ph)DFGS(ph)LMTMLVS(ph)CKKLTEIK_	3 Phospho (STY)	sp|Q13075|BIRC1_HUMAN	0.918		_DELHIVEAEAM(ox)NYEGS(ph)PIK_	Phospho (STY)	sp|P06748|NPM_HUMAN	1		_DGYGGSRDS(ph)YSSSR_	Phospho (STY)	sp|P38159|RBMX_HUMAN	0.996		_DVYLS(ph)PRDDGYSTK_	Phospho (STY)	sp|P38159|RBMX_HUMAN	1		_ESESSPGQLS(ph)ISLR_	Phospho (STY)	sp|P42684|ABL2_HUMAN	0.944		_GGRS(ph)RS(ph)SS(ph)PVTELASR_	3 Phospho (STY)	sp|Q9UQ35|SRRM2_HUMAN	0.938		_GPPDFS(ph)SDEEREPTPVLGSGAAAAGR_	Phospho (STY)	sp|P42166|LAP2A_HUMAN	0.809		_ISYIPDEEVSS(ph)PS(ph)PPQR_	2 Phospho (STY)	sp|Q9Y6M1|IF2B2_HUMAN	0.904
_ATS(ph)PLCTSTASM(ox)VSSSPSTPSNIPQKPSQPAAK_	Oxidation (M),Phospho (STY)	sp|P30622|CLIP1_HUMAN	0.855		_DCLIEDS(ph)DDEAGQS_	Phospho (STY)	sp|Q2VPK5|CTU2_HUMAN	1		_CRS(ph)PGM(ox)LEPLGSSR_	Oxidation (M),Phospho (STY)	sp|Q9UQ35|SRRM2_HUMAN	1		_DFQDYMEPEEGCQGS(ph)PQRR_	Phospho (STY)	sp|O43237|DC1L2_HUMAN	1		_DHANYEEDENGDIT(ph)PIK_	Phospho (STY)	sp|Q99547|MPH6_HUMAN	1		_DYDDM(ox)S(ph)PR_	Oxidation (M),Phospho (STY)	sp|P61978|HNRPK_HUMAN	1		_ESKEEETS(ph)IDVAGKPNEVTK_	Phospho (STY)	sp|P53985|MOT1_HUMAN	0.996		_GGS(ph)GYHS(ph)RS(ph)PAR_	3 Phospho (STY)	sp|Q9UQ35|SRRM2_HUMAN	0.983		_GPPEDRDAEPQPGS(ph)PAAESLEEPDAAAGLSSTK_	Phospho (STY)	sp|Q9H9J4|UBP42_HUMAN	0.991		_IYHLPDAES(ph)DEDEDFK_	Phospho (STY)	sp|Q15019|SEPT2_HUMAN	1
_ATS(ph)PLVSLYPALECR_	Phospho (STY)	sp|Q96G74|OTUD5_HUMAN	0.871		_DDAT(ph)PVRDEPMDAESITFK_	Phospho (STY)	sp|Q7Z6E9|RBBP6_HUMAN	1		_CS(ph)PLEPDFVPDEK_	Phospho (STY)	sp|Q5JSZ5|PRC2B_HUMAN	1		_DFQEYVEPGEDFPAS(ph)PQR_	Phospho (STY)	sp|Q9Y6G9|DC1L1_HUMAN	1		_DHFGLEGDEESTM(ox)LEDSVS(ph)PKK_	Oxidation (M),Phospho (STY)	sp|Q9Y490|TLN1_HUMAN	0.847		_DYDDMS(ph)PR_	Phospho (STY)	sp|P61978|HNRPK_HUMAN	1		_ESRQES(ph)DPEDDDVK_	Phospho (STY)	sp|Q9H307|PININ_HUMAN	1		_GGSGS(ph)GPTIEEVD_	Phospho (STY)	sp|P08107|HSP71_HUMAN	0.888		_GPPS(ph)PPAPVM(ox)HS(ph)PSRK_	Oxidation (M),2 Phospho (STY)	sp|Q13573|SNW1_HUMAN	0.878		_IYHLPDAES(ph)DEDEDFKEQTR_	Phospho (STY)	sp|Q15019|SEPT2_HUMAN	0.993
_ATSDTLES(ph)PPK_	2 Phospho (STY)	sp|O94782|UBP1_HUMAN	0.99		_DDEEKPKIEDVGS(ph)DEEDDSGK_	Phospho (STY)	sp|P08238|HS90B_HUMAN	1		_CTLPEHES(ph)PSQDISDACEAESTER_	Phospho (STY)	sp|Q32MZ4|LRRF1_HUMAN	0.862		_DFQEYVEPGEDFPAS(ph)PQRR_	Phospho (STY)	sp|Q9Y6G9|DC1L1_HUMAN	1		_DHS(ph)DS(ph)DDQM(ox)LVAK_	Oxidation (M),2 Phospho (STY)	sp|Q9NW75|GPTC2_HUMAN	1		_DYEIESQNPLAS(ph)PTNTLLGSAK_	Phospho (STY)	sp|Q7Z417|NUFP2_HUMAN	0.977		_ESRQES(ph)DPEDDDVKKPALQSSVVATSK_	Phospho (STY)	sp|Q9H307|PININ_HUMAN	0.858		_GGSISVQVNSIKFDS(ph)E_	Phospho (STY)	sp|Q14978|NOLC1_HUMAN	1		_GPPS(ph)PPAPVMHS(ph)PSRK_	2 Phospho (STY)	sp|Q13573|SNW1_HUMAN	0.983		_KAAS(ph)PS(ph)PQS(ph)VR_	3 Phospho (STY)	sp|Q8IYB3|SRRM1_HUMAN	1
_ATSSS(ph)SGSLSATGR_	Phospho (STY)	sp|Q03252|LMNB2_HUMAN	0.891		_DDFES(ph)EEEDVK_	Phospho (STY)	sp|Q7Z6E9|RBBP6_HUMAN	1		_CTLPEHESPS(ph)QDISDACEAESTER_	Phospho (STY)	sp|Q32MZ4|LRRF1_HUMAN	0.808		_DFTNEAPPAPLPDASASPLS(ph)PHRR_	Phospho (STY)	sp|Q6WCQ1|MPRIP_HUMAN	0.873		_DHS(ph)NNDREVPPDLTK_	Phospho (STY)	sp|Q8NI27|THOC2_HUMAN	1		_DYGHS(ph)SSRDDYPSR_	Phospho (STY)	sp|P38159|RBMX_HUMAN	0.964		_ESS(ph)PEKEAEEGCPEK_	Phospho (STY)	sp|O43719|HTSF1_HUMAN	0.95		_GHNEGNQSLISAEPIVVS(ph)S(ph)DEEGPVEHK_	2 Phospho (STY)	sp|Q9BQF6|SENP7_HUMAN	1		_GPS(ph)PSPVGSPASVAQSR_	Phospho (STY)	sp|O14497|ARI1A_HUMAN	0.998		_KAAS(ph)PS(ph)PQSVR_	2 Phospho (STY)	sp|Q8IYB3|SRRM1_HUMAN	1
_ATVT(ph)PS(ph)PVK_	Phospho (STY)	sp|Q9H1E3|NUCKS_HUMAN	1		_DDGSSM(ox)SFYVRPS(ph)PAK_	Phospho (STY)	sp|Q9NYB0|TE2IP_HUMAN	1		_DAAAHLQTSHKPSAEDAEGQS(ph)PLSQK_	Phospho (STY)	sp|Q96F24|NRBF2_HUMAN	0.985		_DGDKS(ph)PMSSLQISNEK_	2 Phospho (STY)	sp|Q9UER7|DAXX_HUMAN	1		_DHS(ph)PTPS(ph)VFNSDEER_	2 Phospho (STY)	sp|Q6UN15|FIP1_HUMAN	0.958		_DYS(ph)YER_	Phospho (STY)	sp|P48634|PRC2A_HUMAN	0.991		_ESS(ph)PLYSPTFSDSTSAVK_	Phospho (STY)	sp|P46821|MAP1B_HUMAN	0.805		_GHYEVTGS(ph)DDETGK_	Phospho (STY)	sp|Q09666|AHNK_HUMAN	0.988		_GPSQEEEDNHS(ph)DEEDRASEPK_	Phospho (STY)	sp|Q86VM9|ZCH18_HUMAN	1		_KAEDS(ph)DS(ph)EPEPEDNVR_	2 Phospho (STY)	sp|Q9H0D6|XRN2_HUMAN	1
_ATVT(ph)PSPVK_	Phospho (STY)	sp|Q9H1E3|NUCKS_HUMAN	0.91		_DDHS(ph)ASRQPEYR_	Phospho (STY)	sp|Q8NEY8|PPHLN_HUMAN	0.969		_DAASKPSGEGSFSKPGDGGS(ph)PSKPSDHEPPK_	Phospho (STY)	sp|O14654|IRS4_HUMAN	0.952		_DGEGT(ph)EEGEK_	Phospho (STY)	sp|P23470|PTPRG_HUMAN	1		_DHS(ph)PTPSVFNS(ph)DEER_	2 Phospho (STY)	sp|Q6UN15|FIP1_HUMAN	0.989		_DYTGCSTSESLS(ph)PVK_	Phospho (STY)	sp|O95297|MPZL1_HUMAN	0.969		_ESSANNSVS(ph)PSESLR_	Phospho (STY)	sp|Q04726|TLE3_HUMAN	0.98		_GIS(ph)QTNLITTVT(ph)PEK_	2 Phospho (STY)	sp|Q9Y2J2|E41L3_HUMAN	0.945		_GPTSTSIDNIDGT(ph)PVRDER_	Phospho (STY)	sp|Q5VT52|RPRD2_HUMAN	1		_KAEGEPQEES(ph)PLK_	Phospho (STY)	sp|Q9NYF8|BCLF1_HUMAN	1
_ATVTPS(ph)PVK_	Oxidation (M),2 Phospho (STY)	sp|Q9H1E3|NUCKS_HUMAN	0.996		_DDPDGKQEAKPQQAAGM(ox)LS(ph)PK_	Phospho (STY)	sp|Q13428|TCOF_HUMAN	1		_DAASKPSGEGSFSKPGDGGSPS(ph)KPSDHEPPK_	Phospho (STY)	sp|O14654|IRS4_HUMAN	0.862		_DGETLEGS(ph)DAEESLDK_	Phospho (STY)	sp|Q9P2D1|CHD7_HUMAN	0.827		_DHS(ph)PTPSVFNS(ph)DEERYR_	2 Phospho (STY)	sp|Q6UN15|FIP1_HUMAN	0.997		_EAAGPAPS(ph)PM(ox)R_	Oxidation (M),Phospho (STY)	sp|Q12834|CDC20_HUMAN	1		_ESVPEFPLS(ph)PPK_	Phospho (STY)	sp|P16949|STMN1_HUMAN	1		_GKEELAEAEIIKDS(ph)PDSPEPPNK_	Phospho (STY)	sp|Q9NVM9|ASUN_HUMAN	0.9		_GPTTGEGALDLSDVHS(ph)PPKS(ph)PEGK_	2 Phospho (STY)	sp|O95684|FR1OP_HUMAN	0.999		_KAENAEGQTPAIGPDGEPLDET(ph)S(ph)QM(ox)SDLPVK_	Oxidation (M),2 Phospho (STY)	sp|P51532|SMCA4_HUMAN	0.801
_AVAS(ph)PEATVSQTDENK_	Oxidation (M),Phospho (STY)	sp|Q641Q2|FA21A_HUMAN	1		_DDPDGKQEAKPQQAAGMLS(ph)PK_	Phospho (STY)	sp|Q13428|TCOF_HUMAN	1		_DADLS(ph)PVNASIIK_	Phospho (STY)	sp|O75970|MPDZ_HUMAN	1		_DGGS(ph)GNSTIIVSR_	Phospho (STY)	sp|Q7Z6Z7|HUWE1_HUMAN	1		_DHS(ph)PTPSVFNSDEER_	Phospho (STY)	sp|Q6UN15|FIP1_HUMAN	1		_EAALPPVS(ph)PLK_	Phospho (STY)	sp|Q04637|IF4G1_HUMAN	1		_ETAPEEPGS(ph)PAK_	Phospho (STY)	sp|P35612|ADDB_HUMAN	1		_GKEELAEAEIIKDSPDS(ph)PEPPNK_	Phospho (STY)	sp|Q9NVM9|ASUN_HUMAN	0.935		_GQPGNAYDGAGQPSAAYLSMSQGAVANANST(ph)PPPYER_	Phospho (STY)	sp|Q96PK6|RBM14_HUMAN	0.915		_KAENAEGQTPAIGPDGEPLDETS(ph)QM(ox)S(ph)DLPVK_	Oxidation (M),2 Phospho (STY)	sp|P51532|SMCA4_HUMAN	0.84
_AVDITT(ph)PK_	Oxidation (M),Phospho (STY)	sp|O75475|PSIP1_HUMAN	0.962		_DEALQNIS(ph)ADDLPDSASQAAHPQDSAFSYR_	Phospho (STY)	sp|Q14C86|GAPD1_HUMAN	1		_DAEPQPGS(ph)PAAESLEEPDAAAGLSSTK_	Phospho (STY)	sp|Q9H9J4|UBP42_HUMAN	0.992		_DGLAPEKT(ph)SPDRDK_	Phospho (STY)	sp|Q7L4I2|RSRC2_HUMAN	0.882		_DHS(ph)PTPSVFNSDEERYR_	Phospho (STY)	sp|Q6UN15|FIP1_HUMAN	0.999		_EAANEAGDS(ph)SQDEAEDDVK_	Phospho (STY)	sp|Q9NVU0|RPC5_HUMAN	0.961		_ETDPVKS(ph)PPLPEHQK_	Phospho (STY)	sp|Q96JM3|CHAP1_HUMAN	0.988		_GKGS(ph)PRPQAPK_	Phospho (STY)	sp|Q14978|NOLC1_HUMAN	1		_GRAEGEWEDQEALDYFS(ph)DK_	Phospho (STY)	sp|Q9NYF8|BCLF1_HUMAN	1		_KDSNELS(ph)DS(ph)AGEEDSADLK_	2 Phospho (STY)	sp|Q9Y6X9|MORC2_HUMAN	1
_AVEES(ph)S(ph)DEERQR_	Oxidation (M),Phospho (STY)	sp|Q9BW71|HIRP3_HUMAN	1		_DEDM(ox)LYS(ph)PELAQR_	Phospho (STY)	sp|Q9Y2W2|WBP11_HUMAN	0.938		_DAEYIYPSLES(ph)DDDDPALK_	Phospho (STY)	sp|Q9UPP1|PHF8_HUMAN	1		_DGLAPEKTS(ph)PDRDK_	Phospho (STY)	sp|Q7L4I2|RSRC2_HUMAN	0.873		_DHSPTPS(ph)VFNS(ph)DEER_	2 Phospho (STY)	sp|Q6UN15|FIP1_HUMAN	0.885		_EAARS(ph)PDKPGGS(ph)PSASR_	2 Phospho (STY)	sp|Q9Y3T9|NOC2L_HUMAN	0.978		_ETPHS(ph)PGVEDAPIAK_	Phospho (STY)	sp|Q9UHB6|LIMA1_HUMAN	0.976		_GKS(ph)PVPKS(ph)PVEEK_	2 Phospho (STY)	sp|P07197|NFM_HUMAN	1		_GRAEGEWEDQEALDYFS(ph)DKESGK_	Phospho (STY)	sp|Q9NYF8|BCLF1_HUMAN	0.999		_KES(ph)KEEET(ph)S(ph)IDVAGKPNEVTK_	3 Phospho (STY)	sp|P53985|MOT1_HUMAN	0.999
_AVLSDS(ph)PQLSEGK_	2 Phospho (STY)	sp|Q7Z4H7|HAUS6_HUMAN	0.998		_DEEQSEADAGS(ph)GPPTPGPTTLGPK_	2 Phospho (STY)	sp|Q6ZRS2|SRCAP_HUMAN	0.994		_DAGGPRPES(ph)PVPAGR_	Phospho (STY)	sp|Q9BVG9|PTSS2_HUMAN	1		_DGLNQTTIPVS(ph)PPSTTKPSR_	Phospho (STY)	sp|Q71RC2|LARP4_HUMAN	0.996		_DIDISS(ph)PEFK_	Phospho (STY)	sp|Q09666|AHNK_HUMAN	0.981		_EAARS(ph)PDKPGGSPSASR_	Phospho (STY)	sp|Q9Y3T9|NOC2L_HUMAN	1		_ETQS(ph)PEQVK_	Phospho (STY)	sp|Q9NYF8|BCLF1_HUMAN	0.971		_GKS(ph)PVS(ph)KSPVEEK_	2 Phospho (STY)	sp|P07197|NFM_HUMAN	0.971		_GREDVSNFDDEFTSEAPILT(ph)PPREPR_	Phospho (STY)	sp|Q16513|PKN2_HUMAN	1		_KES(ph)KEEETSIDVAGKPNEVTK_	Phospho (STY)	sp|P53985|MOT1_HUMAN	0.965
_AVPIAVADEGES(ph)ESEDDDLKPR_	Phospho (STY)	sp|Q9Y2K6|UBP20_HUMAN	0.93		_DEILPTT(ph)PISEQK_	Phospho (STY)	sp|P23396|RS3_HUMAN	1		_DALGDSLQVPVS(ph)PSSTTSSR_	Phospho (STY)	sp|Q9Y2D5|AKAP2_HUMAN	0.942		_DGLPRT(ph)PSRR_	Phospho (STY)	sp|Q9UQ35|SRRM2_HUMAN	1		_DIEIS(ph)T(ph)EEEK_	2 Phospho (STY)	sp|Q4G0J3|LARP7_HUMAN	1		_EAARSPDKPGGS(ph)PS(ph)ASR_	2 Phospho (STY)	sp|Q9Y3T9|NOC2L_HUMAN	0.866		_ETS(ph)VSKEDT(ph)DHEEKASNEDVTK_	2 Phospho (STY)	sp|O75475|PSIP1_HUMAN	0.805		_GKS(ph)PVSKS(ph)PVEEK_	2 Phospho (STY)	sp|P07197|NFM_HUMAN	0.999		_GRPPAEKLS(ph)PNPPNLTK_	Phospho (STY)	sp|P51532|SMCA4_HUMAN	1		_KET(ph)ES(ph)EAEDNLDDLEK_	2 Phospho (STY)	sp|Q8IYB3|SRRM1_HUMAN	1
_AVPM(ox)APAPAS(ph)PGSSNDSSAR_	Phospho (STY)	sp|Q66K74|MAP1S_HUMAN	0.859		_DELHIVEAEAM(ox)NYEGS(ph)PIK_	Phospho (STY)	sp|P06748|NPM_HUMAN	1		_DAPIS(ph)PASIASSSSTPSSK_	Phospho (STY)	sp|Q04727|TLE4_HUMAN	1		_DGPGLERS(ph)PGEPGGAAPER_	Phospho (STY)	sp|Q96EB6|SIR1_HUMAN	1		_DIEIS(ph)T(ph)EEEKDTGDLK_	2 Phospho (STY)	sp|Q4G0J3|LARP7_HUMAN	1		_EAASSSSGTQPAPPAPAS(ph)PWDSK_	Phospho (STY)	sp|Q9H7N4|SFR19_HUMAN	0.997		_ETSVSKEDT(ph)DHEEKAS(ph)NEDVTK_	2 Phospho (STY)	sp|O75475|PSIP1_HUMAN	0.894		_GLAAEDS(ph)GGDSK_	Phospho (STY)	sp|P41227|NAA10_HUMAN	0.998		_GRRS(ph)PILLPK_	Phospho (STY)	sp|Q8TD16|BICD2_HUMAN	1		_KET(ph)QSPEQVK_	Phospho (STY)	sp|Q9NYF8|BCLF1_HUMAN	0.997
_AVPM(ox)APAPASPGS(ph)SNDSSAR_	Oxidation (M),Phospho (STY)	sp|Q66K74|MAP1S_HUMAN	0.862		_DFQDYMEPEEGCQGS(ph)PQRR_	Oxidation (M),Phospho (STY)	sp|O43237|DC1L2_HUMAN	1		_DAPTS(ph)PASVASSSSTPSSK_	Phospho (STY)	sp|Q04726|TLE3_HUMAN	0.991		_DGQDAIAQS(ph)PEK_	Phospho (STY)	sp|Q9NWH9|SLTM_HUMAN	1		_DIEVLS(ph)EDT(ph)DYEEDEVTK_	2 Phospho (STY)	sp|Q4LE39|ARI4B_HUMAN	0.999		_EAASSSSGTQPAPPAPAS(ph)PWDSKK_	Phospho (STY)	sp|Q9H7N4|SFR19_HUMAN	0.961		_ETVQTTQSPT(ph)PVEK_	Phospho (STY)	sp|Q9UPN6|SCAF8_HUMAN	0.819		_GLAEVQQDGEAEEGATS(ph)DGEK_	Phospho (STY)	sp|Q02952|AKA12_HUMAN	0.999		_GRS(ph)PQPPAEEDEDDFDDTLVAIDTYNCDLHFK_	Phospho (STY)	sp|Q9BUJ2|HNRL1_HUMAN	1		_KETES(ph)EAEDNLDDLEK_	Phospho (STY)	sp|Q8IYB3|SRRM1_HUMAN	1
_AVPPVS(ph)PELR_	2 Phospho (STY)	sp|Q96JM3|CHAP1_HUMAN	1		_DFQEYVEPGEDFPAS(ph)PQR_	Phospho (STY)	sp|Q9Y6G9|DC1L1_HUMAN	1		_DAQRLS(ph)PIPEEVPK_	Phospho (STY)	sp|Q96T23|RSF1_HUMAN	1		_DGQVINET(ph)SQHHDDLE_	Phospho (STY)	sp|P08670|VIME_HUMAN	0.806		_DIEVLS(ph)EDT(ph)DYEEDEVTKK_	2 Phospho (STY)	sp|Q4LE39|ARI4B_HUMAN	0.997		_EAATQEDPEQLPELEAHGVS(ph)ESEGEERPVAEEEILLR_	Phospho (STY)	sp|Q9BVJ6|UT14A_HUMAN	0.962		_EVAENQQNQS(ph)SDPEEEK_	Phospho (STY)	sp|O43491|E41L2_HUMAN	0.948		_GLLYDS(ph)DEEDEERPAR_	Phospho (STY)	sp|P49736|MCM2_HUMAN	1		_GS(ph)HS(ph)SALERLETK_	2 Phospho (STY)	sp|Q8IV03|LUR1L_HUMAN	1		_KETQS(ph)PEQVK_	Phospho (STY)	sp|Q9NYF8|BCLF1_HUMAN	0.894
_AVQQHQHGYDS(ph)DEEVDSELGTWEHQLR_	2 Phospho (STY)	sp|Q8IWZ8|SUGP1_HUMAN	0.998		_DFQEYVEPGEDFPAS(ph)PQRR_	Phospho (STY)	sp|Q9Y6G9|DC1L1_HUMAN	1		_DAS(ph)PINR_	Phospho (STY)	sp|Q13523|PRP4B_HUMAN	1		_DGQVINETS(ph)QHHDDLE_	Phospho (STY)	sp|P08670|VIME_HUMAN	0.954		_DIFYYEDDS(ph)EGEDIEK_	Phospho (STY)	sp|Q15361|TTF1_HUMAN	1		_EAAVSASDILQES(ph)AIHSPGTVEK_	Phospho (STY)	sp|Q96C57|CL043_HUMAN	0.861		_EVDEDS(ph)EPER_	Phospho (STY)	sp|Q53GS9|SNUT2_HUMAN	1		_GLLYDS(ph)DEEDEERPARK_	Phospho (STY)	sp|P49736|MCM2_HUMAN	0.999		_GS(ph)PDGSLQTGKPSAPK_	Phospho (STY)	sp|Q8IZL8|PELP1_HUMAN	0.98		_KFDHES(ph)SPGT(ph)DEDK_	2 Phospho (STY)	sp|Q13427|PPIG_HUMAN	0.927
_AVS(ph)VPASFFR_	Phospho (STY)	sp|O14654|IRS4_HUMAN	0.999		_DFQHLISS(ph)PLK_	Oxidation (M),Phospho (STY)	sp|Q15361|TTF1_HUMAN	0.811		_DAS(ph)PINRWS(ph)PTR_	2 Phospho (STY)	sp|Q13523|PRP4B_HUMAN	1		_DGSS(ph)PPLLEK_	Phospho (STY)	sp|Q6W2J9|BCOR_HUMAN	0.969		_DIIRQPS(ph)EEEIIK_	Phospho (STY)	sp|Q15121|PEA15_HUMAN	1		_EAAVSASDILQESAIHS(ph)PGTVEK_	Phospho (STY)	sp|Q96C57|CL043_HUMAN	0.802		_EVDEDS(ph)EPEREVR_	Phospho (STY)	sp|Q53GS9|SNUT2_HUMAN	1		_GLS(ph)HVAM(ox)GQFY(ph)EGIKAQTK_	Oxidation (M),2 Phospho (STY)	sp|Q8NBP0|TTC13_HUMAN	1		_GS(ph)PHYFS(ph)PFRPY_	2 Phospho (STY)	sp|Q13242|SRSF9_HUMAN	1		_KFDHESS(ph)PGT(ph)DEDKSG_	2 Phospho (STY)	sp|Q13427|PPIG_HUMAN	0.991
_AVSETPAVPPVS(ph)EDEDDDDDDATPPPVIAPRPEHTK_	Phospho (STY)	sp|Q13153|PAK1_HUMAN	1		_DFQHLISS(ph)PLKK_	Phospho (STY)	sp|Q15361|TTF1_HUMAN	0.997		_DASSS(ph)PASTASSASSTSLK_	Phospho (STY)	sp|Q04724|TLE1_HUMAN	0.916		_DGTAPPPQSPGSPGTGQDEEWS(ph)DEESPRK_	Phospho (STY)	sp|Q9UKS6|PACN3_HUMAN	0.999		_DIKEES(ph)DEEEEDDEESGRLR_	Phospho (STY)	sp|Q96EV2|RBM33_HUMAN	1		_EAAVSASDILQESAIHSPGT(ph)VEK_	Phospho (STY)	sp|Q96C57|CL043_HUMAN	0.989		_EVDGLLTSEPM(ox)GS(ph)PVSSK_	Oxidation (M),Phospho (STY)	sp|Q8WWM7|ATX2L_HUMAN	1		_GLS(ph)PAM(ox)S(ph)PALQR_	Oxidation (M),2 Phospho (STY)	sp|Q96DF8|DGC14_HUMAN	1		_GS(ph)PHYFSPFRPY_	Phospho (STY)	sp|Q13242|SRSF9_HUMAN	1		_KGAAEEAELEDS(ph)DDEEKPVK_	Phospho (STY)	sp|Q9UBB9|TFP11_HUMAN	1
_AVSPPHLDGPPS(ph)PR_	Phospho (STY)	sp|P29590|PML_HUMAN	1		_DFS(ph)PEALKK_	2 Phospho (STY)	sp|O15372|EIF3H_HUMAN	1		_DASTS(ph)PPNRETIGSAQCK_	Phospho (STY)	sp|Q15154|PCM1_HUMAN	0.812		_DGTS(ph)PEEEIEIER_	Oxidation (M),Phospho (STY)	sp|Q9H501|ESF1_HUMAN	0.99		_DIPRT(ph)PSR_	Phospho (STY)	sp|Q9UQ35|SRRM2_HUMAN	0.996		_EADDDEEVDDNIPEM(ox)PS(ph)PKK_	Oxidation (M),Phospho (STY)	sp|P26358|DNMT1_HUMAN	1		_EVLYDS(ph)EGLS(ph)GEER_	2 Phospho (STY)	sp|Q9H7N4|SFR19_HUMAN	0.997		_GLVAAYSGDS(ph)DNEEELVER_	Phospho (STY)	sp|P52756|RBM5_HUMAN	0.995		_GS(ph)SPGPRPVEGTPASR_	Phospho (STY)	sp|Q13112|CAF1B_HUMAN	0.828		_KGAAEEAELEDS(ph)DDEEKPVKQDDFPK_	Phospho (STY)	sp|Q9UBB9|TFP11_HUMAN	1
_AVSTVVVTTAPS(ph)PK_	Phospho (STY)	sp|Q6P4R8|NFRKB_HUMAN	0.904		_DGDKS(ph)PMSSLQISNEK_	Phospho (STY)	sp|Q9UER7|DAXX_HUMAN	1		_DCEYQQISPGAAPLPAS(ph)PGAR_	Phospho (STY)	sp|Q9NUE0|ZDH18_HUMAN	1		_DGVLTLANNVT(ph)PAK_	Phospho (STY)	sp|P27816|MAP4_HUMAN	1		_DITDPLSLNTCTDEGHVVLAS(ph)PLK_	Phospho (STY)	sp|Q7L2J0|MEPCE_HUMAN	0.917		_EADDDEEVDDNIPEMPS(ph)PKK_	Phospho (STY)	sp|P26358|DNMT1_HUMAN	1		_EVPSKEEPS(ph)PVK_	Phospho (STY)	sp|P46821|MAP1B_HUMAN	0.999		_GLVAAYSGES(ph)DS(ph)EEEQER_	2 Phospho (STY)	sp|P98175|RBM10_HUMAN	1		_GS(ph)YGDLGGPIITTQVTIPK_	Phospho (STY)	sp|P61978|HNRPK_HUMAN	1		_KGDVEGS(ph)QSQDEGEGSGESER_	Phospho (STY)	sp|Q9UQE7|SMC3_HUMAN	0.812
_AVT(ph)PENHESM(ox)TSIFPSAAVGLK_	Phospho (STY)	sp|Q86UW6|N4BP2_HUMAN	0.941		_DGETLEGS(ph)DAEESLDK_	Phospho (STY)	sp|Q9P2D1|CHD7_HUMAN	1		_DCLIEDS(ph)DDEAGQS_	Phospho (STY)	sp|Q2VPK5|CTU2_HUMAN	1		_DGYGGSRDS(ph)YSSSR_	2 Phospho (STY)	sp|P38159|RBMX_HUMAN	0.995		_DKAPVQPQQS(ph)PAAAPGGTDEKPSGK_	Phospho (STY)	sp|Q13200|PSMD2_HUMAN	1		_EAGS(ph)PAQEFK_	Phospho (STY)	sp|Q5JSZ5|PRC2B_HUMAN	1		_EVQAEQPSSSS(ph)PR_	Phospho (STY)	sp|Q9Y388|RBMX2_HUMAN	0.994		_GLVAAYSGES(ph)DS(ph)EEEQERGGPER_	2 Phospho (STY)	sp|P98175|RBM10_HUMAN	0.977		_GSFS(ph)DTGLGDGK_	Phospho (STY)	sp|Q9Y2W1|TR150_HUMAN	0.969		_KGDVEGSQS(ph)QDEGEGSGESER_	Phospho (STY)	sp|Q9UQE7|SMC3_HUMAN	0.999
_AVT(ph)PVPTK_	2 Phospho (STY)	sp|Q6PKG0|LARP1_HUMAN	0.994		_DGGS(ph)GNSTIIVSR_	Oxidation (M),Phospho (STY)	sp|Q7Z6Z7|HUWE1_HUMAN	0.999		_DDEEKPKIEDVGS(ph)DEEDDSGK_	Phospho (STY)	sp|P08238|HS90B_HUMAN	0.999		_DHANYEEDENGDIT(ph)PIK_	Phospho (STY)	sp|Q99547|MPH6_HUMAN	1		_DKDVTLS(ph)PVK_	Phospho (STY)	sp|Q8NFC6|BD1L1_HUMAN	0.996		_EALAEAALES(ph)PRPALVR_	Phospho (STY)	sp|O14745|NHRF1_HUMAN	1		_EVS(ph)DDEAEEK_	Phospho (STY)	sp|P07900|HS90A_HUMAN	1		_GLVAAYSGES(ph)DS(ph)EEEQERGGPEREEK_	2 Phospho (STY)	sp|P98175|RBM10_HUMAN	0.999		_GSPHYFS(ph)PFRPY_	Phospho (STY)	sp|Q13242|SRSF9_HUMAN	1		_KGGEFDEFVNDDT(ph)DDDLPISK_	Phospho (STY)	sp|Q6PD62|CTR9_HUMAN	1
_AVT(ph)PVSQGSNSSSADPK_	Phospho (STY)	sp|O00512|BCL9_HUMAN	1		_DGKFS(ph)PIQEK_	Oxidation (M),Phospho (STY)	sp|O43683|BUB1_HUMAN	1		_DDFES(ph)EEEDVK_	Phospho (STY)	sp|Q7Z6E9|RBBP6_HUMAN	1		_DHS(ph)PT(ph)PSVFNSDEERYR_	Phospho (STY)	sp|Q6UN15|FIP1_HUMAN	0.899		_DKEDS(ph)DELEEGRGGVSEGEPDPADPK_	Phospho (STY)	sp|Q8IZ40|RCOR2_HUMAN	0.919		_EALGLGPPAAQLT(ph)PPPAPVGLR_	Phospho (STY)	sp|Q8IY67|RAVR1_HUMAN	1		_EVS(ph)DDEAEEKEDK_	Phospho (STY)	sp|P07900|HS90A_HUMAN	1		_GNAEGS(ph)S(ph)DEEGKLVIDEPAK_	2 Phospho (STY)	sp|P51858|HDGF_HUMAN	1		_GSRIIS(ph)T(ph)IVKLVT(ph)T(ph)Q_	4 Phospho (STY)	sp|Q6P158|DHX57_HUMAN	0.894		_KGNAEGS(ph)S(ph)DEEGKLVIDEPAK_	2 Phospho (STY)	sp|P51858|HDGF_HUMAN	1
_AVTIANS(ph)PSKPSEK_	Phospho (STY)	sp|Q8NEF9|SRFB1_HUMAN	0.999		_DGLAPEKTS(ph)PDRDK_	Oxidation (M),2 Phospho (STY)	sp|Q7L4I2|RSRC2_HUMAN	0.978		_DDGSSM(ox)SFYVRPS(ph)PAK_	Oxidation (M),Phospho (STY)	sp|Q9NYB0|TE2IP_HUMAN	1		_DHS(ph)PTPS(ph)VFNSDEER_	Phospho (STY)	sp|Q6UN15|FIP1_HUMAN	1		_DKEIS(ph)PSVTK_	Phospho (STY)	sp|Q8N488|RYBP_HUMAN	0.803		_EAS(ph)PAPLAQGEPGREDLPTR_	Phospho (STY)	sp|Q9P1Y6|PHRF1_HUMAN	1		_EVS(ph)DDEAEEKEDKEEEK_	Phospho (STY)	sp|P07900|HS90A_HUMAN	1		_GNDPLTS(ph)S(ph)PGR_	2 Phospho (STY)	sp|P49736|MCM2_HUMAN	0.988		_GSRPPLILQSQSLPCSS(ph)PR_	Phospho (STY)	sp|Q6KC79|NIPBL_HUMAN	0.987		_KHIKEEPLS(ph)EEEPCTSTAIAS(ph)PEK_	2 Phospho (STY)	sp|Q9Y2X3|NOP58_HUMAN	0.992
_AVTIANSPSKPS(ph)EK_	Oxidation (M),Phospho (STY)	sp|Q8NEF9|SRFB1_HUMAN	0.931		_DGLNQTTIPVS(ph)PPSTTKPSR_	Phospho (STY)	sp|Q71RC2|LARP4_HUMAN	0.999		_DDPDGKQEAKPQQAAGM(ox)LS(ph)PK_	Oxidation (M),Phospho (STY)	sp|Q13428|TCOF_HUMAN	1		_DHS(ph)PTPSVFNS(ph)DEER_	Phospho (STY)	sp|Q6UN15|FIP1_HUMAN	0.984		_DKEVS(ph)DDEAEEK_	Phospho (STY)	sp|P07900|HS90A_HUMAN	1		_EASRPPEEPSAPS(ph)PTLPAQFK_	Phospho (STY)	sp|Q9H3P2|NELFA_HUMAN	1		_EVYELLDS(ph)PGK_	Phospho (STY)	sp|P22234|PUR6_HUMAN	1		_GNDPLTSS(ph)PGR_	Phospho (STY)	sp|P49736|MCM2_HUMAN	0.998		_GSVPLSSSPPAT(ph)HFPDETEITNPVPK_	Phospho (STY)	sp|P11388|TOP2A_HUMAN	0.896		_KHS(ph)PS(ph)PPPPTPTESR_	2 Phospho (STY)	sp|Q92922|SMRC1_HUMAN	1
_AVTTVTQSTPVPGPSVPPPEELQVS(ph)PGPR_	Phospho (STY)	sp|P51610|HCFC1_HUMAN	1		_DGLPRT(ph)PSR_	Phospho (STY)	sp|Q9UQ35|SRRM2_HUMAN	1		_DDPDGKQEAKPQQAAGMLS(ph)PK_	Phospho (STY)	sp|Q13428|TCOF_HUMAN	1		_DHS(ph)PTPSVFNS(ph)DEERYR_	Phospho (STY)	sp|Q6UN15|FIP1_HUMAN	0.955		_DKM(ox)EGS(ph)DFESSGGR_	Oxidation (M),Phospho (STY)	sp|Q8WYH8|ING5_HUMAN	1		_EATAQKPTGSVGSTVTT(ph)PPPLVR_	Phospho (STY)	sp|Q86YP4|P66A_HUMAN	0.926		_EY(ph)IQAGYSSPR_	Phospho (STY)	sp|Q9H9V9|JMJD4_HUMAN	0.999		_GNEPGSDRS(ph)PS(ph)PSK_	2 Phospho (STY)	sp|Q5VT52|RPRD2_HUMAN	0.929		_GSYGS(ph)DAEEEEYRQQLSEHSK_	Phospho (STY)	sp|Q9UDY2|ZO2_HUMAN	0.986		_KIPDPDS(ph)DDVS(ph)EVDAR_	2 Phospho (STY)	sp|P51532|SMCA4_HUMAN	1
_AVVVS(ph)PKEENK_	Phospho (STY)	sp|O75909|CCNK_HUMAN	1		_DGM(ox)DT(ph)VKKIES(ph)FGSPK_	Oxidation (M),Phospho (STY)	sp|P49792|RBP2_HUMAN	0.975		_DDQVGVWS(ph)SPPPR_	Phospho (STY)	sp|P17927|CR1_HUMAN	0.914		_DHS(ph)PTPSVFNSDEER_	Phospho (STY)	sp|Q6UN15|FIP1_HUMAN	1		_DKMEGS(ph)DFESSGGR_	Phospho (STY)	sp|Q8WYH8|ING5_HUMAN	1		_ECINAAPDS(ph)PSK_	Phospho (STY)	sp|Q7Z569|BRAP_HUMAN	0.834		_EYFDDS(ph)TEER_	Phospho (STY)	sp|Q8NEF9|SRFB1_HUMAN	0.904		_GNEPGSDRS(ph)PSPS(ph)K_	2 Phospho (STY)	sp|Q5VT52|RPRD2_HUMAN	0.973		_GTDTQTPAVLS(ph)PSK_	Phospho (STY)	sp|P46087|NOP2_HUMAN	1		_KIQQGEEEEKES(ph)S(ph)GEIEAAPVTGTGR_	2 Phospho (STY)	sp|Q6AI08|HEAT6_HUMAN	1
_AYS(ph)PEYR_	Oxidation (M),Phospho (STY)	sp|Q9UDY2|ZO2_HUMAN	1		_DGPGLERS(ph)PGEPGGAAPER_	Phospho (STY)	sp|Q96EB6|SIR1_HUMAN	1		_DEILPTT(ph)PISEQK_	Phospho (STY)	sp|P23396|RS3_HUMAN	0.995		_DHS(ph)PTPSVFNSDEERYR_	Phospho (STY)	sp|Q6UN15|FIP1_HUMAN	0.988		_DKS(ph)PVREPIDNLTPEER_	Phospho (STY)	sp|Q14498|RBM39_HUMAN	1		_ECINAAPDSPS(ph)K_	Phospho (STY)	sp|Q7Z569|BRAP_HUMAN	0.932		_EYIPGQPPLSQSSDSS(ph)PTR_	Phospho (STY)	sp|P07814|SYEP_HUMAN	0.88		_GNIETT(ph)SEDGQVFS(ph)PKK_	2 Phospho (STY)	sp|Q5T200|ZC3HD_HUMAN	0.866		_GTEPSPGGTPQPSRPVS(ph)PAGPPEGVPEEAQPPR_	Phospho (STY)	sp|Q8WUZ0|BCL7C_HUMAN	0.991		_KKAEPSEVDM(ox)NS(ph)PK_	Oxidation (M),Phospho (STY)	sp|Q9NR30|DDX21_HUMAN	1
_AYT(ph)HQVVTR_	Phospho (STY)	sp|P50613|CDK7_HUMAN	1		_DGQDAIAQS(ph)PEK_	2 Phospho (STY)	sp|Q9NWH9|SLTM_HUMAN	1		_DELHIVEAEAM(ox)NYEGS(ph)PIK_	Oxidation (M),Phospho (STY)	sp|P06748|NPM_HUMAN	1		_DHYQDPVPGIT(ph)PSSSSR_	Phospho (STY)	sp|Q7KZ85|SPT6H_HUMAN	0.987		_DKVEENS(ph)VRSPR_	Phospho (STY)	sp|Q92576|PHF3_HUMAN	0.926		_EDDDVIVNKPHVS(ph)DEEEEEPPFYHHPFK_	Phospho (STY)	sp|P18583|SON_HUMAN	0.999		_EYVSNDAAQS(ph)DDEEK_	Phospho (STY)	sp|Q5JSH3|WDR44_HUMAN	1		_GNIETTS(ph)EDGQVFS(ph)PK_	2 Phospho (STY)	sp|Q5T200|ZC3HD_HUMAN	0.991		_GTGQS(ph)DDSDIWDDTALIK_	Phospho (STY)	sp|Q16637|SMN_HUMAN	0.998		_KKEEPSQNDIS(ph)PK_	Phospho (STY)	sp|Q9NR30|DDX21_HUMAN	1
_AYT(ph)PVVVTLWYR_	Phospho (STY)	sp|P21127|CD11B_HUMAN	0.998		_DGQVINETS(ph)QHHDDLE_	Oxidation (M),3 Phospho (STY)	sp|P08670|VIME_HUMAN	0.997		_DELTES(ph)PK_	Phospho (STY)	sp|Q8NC51|PAIRB_HUMAN	0.989		_DIDIS(ph)SPEFK_	Phospho (STY)	sp|Q09666|AHNK_HUMAN	0.932		_DKVEENSVRS(ph)PR_	Phospho (STY)	sp|Q92576|PHF3_HUMAN	0.983		_EDILENEDEQNS(ph)PPKK_	Phospho (STY)	sp|Q9NTI5|PDS5B_HUMAN	1		_FAS(ph)DDEHDEHDENGATGPVK_	Phospho (STY)	sp|P05455|LA_HUMAN	1		_GNIETTS(ph)EDGQVFS(ph)PKK_	2 Phospho (STY)	sp|Q5T200|ZC3HD_HUMAN	0.985		_GVEPSPS(ph)PIKPGDIK_	Phospho (STY)	sp|Q92890|UFD1_HUMAN	0.999		_KKEPAITSQNS(ph)PEAR_	Phospho (STY)	sp|P23193|TCEA1_HUMAN	1
_AYT(ph)PVVVTQWYR_	Phospho (STY)	sp|Q9UQ88|CD11A_HUMAN	0.974		_DGSS(ph)PPLLEK_	Oxidation (M),Phospho (STY)	sp|Q6W2J9|BCOR_HUMAN	0.999		_DFQDYM(ox)EPEEGCQGS(ph)PQRR_	Oxidation (M),Phospho (STY)	sp|O43237|DC1L2_HUMAN	1		_DIDISS(ph)PEFK_	Phospho (STY)	sp|Q09666|AHNK_HUMAN	0.88		_DLDEEGS(ph)EK_	Phospho (STY)	sp|O43719|HTSF1_HUMAN	1		_EDKPEGQS(ph)PVK_	Phospho (STY)	sp|Q9C0C9|UBE2O_HUMAN	1		_FDALKDDDS(ph)GDHDQNEENSTQK_	Phospho (STY)	sp|O60573|IF4E2_HUMAN	1		_GNS(ph)RPGT(ph)PSAEGGSTSSTLR_	2 Phospho (STY)	sp|P35269|T2FA_HUMAN	0.988		_GVHIHQAGGS(ph)PPASSTSSSSLTNDVAK_	Phospho (STY)	sp|Q8N122|RPTOR_HUMAN	0.999		_KKY(ph)PEYGS(ph)LDLR_	2 Phospho (STY)	sp|Q30KQ9|DB110_HUMAN	0.996
_CDILVQEELLAS(ph)PKK_	Phospho (STY)	sp|Q96JM3|CHAP1_HUMAN	1		_DGTAPPPQSPGSPGTGQDEEWS(ph)DEESPRK_	Phospho (STY)	sp|Q9UKS6|PACN3_HUMAN	0.998		_DFQEYVEPGEDFPAS(ph)PQR_	Phospho (STY)	sp|Q9Y6G9|DC1L1_HUMAN	1		_DIEIS(ph)T(ph)EEEK_	Phospho (STY)	sp|Q4G0J3|LARP7_HUMAN	1		_DLDLLASVPS(ph)PSSSGSR_	Phospho (STY)	sp|Q8WU79|SMAP2_HUMAN	0.974		_EDLPAENGETKTEES(ph)PASDEAGEK_	Phospho (STY)	sp|P05114|HMGN1_HUMAN	0.977		_FEEESKEPVADEEEEDS(ph)DDDVEPITEFR_	Phospho (STY)	sp|P54105|ICLN_HUMAN	1		_GPAS(ph)DS(ph)ETEDASR_	2 Phospho (STY)	sp|Q96ST2|IWS1_HUMAN	0.999		_GVPAGNS(ph)DTEGGQPGRK_	Phospho (STY)	sp|Q9UKV3|ACINU_HUMAN	0.999		_KLEKEEEEGISQES(ph)S(ph)EEEQ_	2 Phospho (STY)	sp|P17096|HMGA1_HUMAN	1
_CGGVEQASSS(ph)PR_	Phospho (STY)	sp|Q5VZL5|ZMYM4_HUMAN	0.86		_DGTS(ph)PEEEIEIER_	Phospho (STY)	sp|Q9H501|ESF1_HUMAN	0.989		_DFQEYVEPGEDFPAS(ph)PQRR_	Phospho (STY)	sp|Q9Y6G9|DC1L1_HUMAN	1		_DIEIS(ph)T(ph)EEEKDTGDLK_	Phospho (STY)	sp|Q4G0J3|LARP7_HUMAN	0.999		_DLDRPESQS(ph)PK_	Phospho (STY)	sp|Q8WUA4|TF3C2_HUMAN	1		_EDLPAENGETKTEESPAS(ph)DEAGEK_	Phospho (STY)	sp|P05114|HMGN1_HUMAN	0.995		_FESLM(ox)NIHGFDLGS(ph)R_	Oxidation (M),Phospho (STY)	sp|Q16659|MK06_HUMAN	1		_GPAS(ph)DSET(ph)EDASR_	2 Phospho (STY)	sp|Q96ST2|IWS1_HUMAN	0.997		_GVVTNGLDLS(ph)PADEK_	Phospho (STY)	sp|P07197|NFM_HUMAN	1		_KLGAGEGGEAS(ph)VS(ph)PEK_	2 Phospho (STY)	sp|Q13428|TCOF_HUMAN	1
_CGSGPVHISGQHLVAVEEDAES(ph)EDEEEEDVK_	2 Phospho (STY)	sp|P06748|NPM_HUMAN	1		_DGVLTLANNVT(ph)PAK_	Phospho (STY)	sp|P27816|MAP4_HUMAN	1		_DFQHLISS(ph)PLKK_	Phospho (STY)	sp|Q15361|TTF1_HUMAN	0.983		_DIEVLS(ph)EDT(ph)DYEEDEVTK_	Phospho (STY)	sp|Q4LE39|ARI4B_HUMAN	0.997		_DLEPGEVPS(ph)DSDEDGEHK_	Phospho (STY)	sp|Q96T58|MINT_HUMAN	0.978		_EDLSPAFDHS(ph)PNK_	Phospho (STY)	sp|P17706|PTN2_HUMAN	1		_FHS(ph)PSTTWS(ph)PNK_	2 Phospho (STY)	sp|Q99590|SCAFB_HUMAN	0.987		_GPGAPGLAHLQESQAGS(ph)DTDVEEGK_	Phospho (STY)	sp|Q14676|MDC1_HUMAN	0.861		_GYTS(ph)DSEVYTDHGRPGK_	Phospho (STY)	sp|Q92538|GBF1_HUMAN	0.902		_KLGAGEGGEASVS(ph)PEK_	Phospho (STY)	sp|Q13428|TCOF_HUMAN	0.999
_CIACQAAKLS(ph)PR_	Phospho (STY)	sp|P49790|NU153_HUMAN	1		_DGYGGS(ph)RDSYSSSR_	Phospho (STY)	sp|P38159|RBMX_HUMAN	0.964		_DFVSYPS(ph)AGNERLHCT(ph)M(ox)KR_	Oxidation (M),2 Phospho (STY)	sp|Q9NRJ4|TULP4_HUMAN	0.864		_DIIRQPS(ph)EEEIIK_	Phospho (STY)	sp|Q15121|PEA15_HUMAN	1		_DLEPGEVPSDS(ph)DEDGEHK_	Phospho (STY)	sp|Q96T58|MINT_HUMAN	0.883		_EDPQARPLEGSSSEDSPPEGQAPPSHS(ph)PR_	Phospho (STY)	sp|Q12789|TF3C1_HUMAN	0.989		_FIIQS(ph)EKPPHYLES(ph)R_	2 Phospho (STY)	sp|P14735|IDE_HUMAN	0.998		_GPGAPGLAHLQESQAGSDT(ph)DVEEGK_	Phospho (STY)	sp|Q14676|MDC1_HUMAN	0.858		_HAS(ph)APSHVQPSDSEK_	Phospho (STY)	sp|O60343|TBCD4_HUMAN	0.99		_KLGVS(ph)VS(ph)PSR_	2 Phospho (STY)	sp|Q86VM9|ZCH18_HUMAN	0.997
_CNFFS(ph)DFGS(ph)LMTMLVS(ph)CKKLTEIK_	2 Phospho (STY)	sp|Q13075|BIRC1_HUMAN	0.815		_DHANYEEDENGDIT(ph)PIK_	Phospho (STY)	sp|Q99547|MPH6_HUMAN	1		_DGDLGLGPIS(ph)DSK_	Phospho (STY)	sp|P78415|IRX3_HUMAN	0.995		_DIKEES(ph)DEEEEDDEESGRLR_	Phospho (STY)	sp|Q96EV2|RBM33_HUMAN	1		_DLESCS(ph)DDDNQGSK_	Phospho (STY)	sp|Q5T3I0|GPTC4_HUMAN	1		_EDTDHEEKAS(ph)NEDVTK_	Phospho (STY)	sp|O75475|PSIP1_HUMAN	1		_FNISSHNQS(ph)PK_	Phospho (STY)	sp|Q9H1A4|APC1_HUMAN	0.998		_GPGGSQGS(ph)QGPSPQGAR_	Phospho (STY)	sp|Q96MG7|MAGG1_HUMAN	0.971		_HAS(ph)PILPITEFSDIPR_	Phospho (STY)	sp|P42167|LAP2B_HUMAN	1		_KLS(ph)GDQPAAR_	Phospho (STY)	sp|Q13428|TCOF_HUMAN	1
_CRS(ph)PGM(ox)LEPLGSSR_	2 Phospho (STY)	sp|Q9UQ35|SRRM2_HUMAN	1		_DHFGLEGDEESTM(ox)LEDSVS(ph)PKK_	Phospho (STY)	sp|Q9Y490|TLN1_HUMAN	0.816		_DGETLEGS(ph)DAEESLDK_	Phospho (STY)	sp|Q9P2D1|CHD7_HUMAN	1		_DIPRT(ph)PSR_	Oxidation (M),Phospho (STY)	sp|Q9UQ35|SRRM2_HUMAN	1		_DLESCSDDDNQGSKS(ph)PK_	Phospho (STY)	sp|Q5T3I0|GPTC4_HUMAN	0.908		_EDVEVAES(ph)PLR_	Phospho (STY)	sp|Q99567|NUP88_HUMAN	1		_FQEQECPPS(ph)PEPTRK_	Phospho (STY)	sp|P62070|RRAS2_HUMAN	0.999		_GPGGSQGSQGPS(ph)PQGAR_	Phospho (STY)	sp|Q96MG7|MAGG1_HUMAN	0.947		_HASSSPES(ph)PKPAPAPGSHR_	Phospho (STY)	sp|Q9UQ35|SRRM2_HUMAN	1		_KLS(ph)VPT(ph)S(ph)DEEDEVPAPKPR_	3 Phospho (STY)	sp|Q8NE71|ABCF1_HUMAN	1
_CTLPEHES(ph)PSQDISDACEAESTER_	2 Phospho (STY)	sp|Q32MZ4|LRRF1_HUMAN	0.971		_DHS(ph)DS(ph)DDQM(ox)LVAK_	Phospho (STY)	sp|Q9NW75|GPTC2_HUMAN	1		_DGGS(ph)GNST(ph)IIVSR_	2 Phospho (STY)	sp|Q7Z6Z7|HUWE1_HUMAN	0.886		_DIPRTPS(ph)R_	Phospho (STY)	sp|Q9UQ35|SRRM2_HUMAN	0.996		_DLFDLNS(ph)SEEDDTEGFSER_	Phospho (STY)	sp|Q9Y3T9|NOC2L_HUMAN	0.971		_EDVSASGPS(ph)PEATQLAK_	Phospho (STY)	sp|Q96T58|MINT_HUMAN	0.994		_FS(ph)PGAPGGSGSQPNQK_	Phospho (STY)	sp|Q15942|ZYX_HUMAN	0.953		_GPHHLDNSS(ph)PGPGSEAR_	Phospho (STY)	sp|Q8WWM7|ATX2L_HUMAN	0.81		_HDS(ph)PEDVK_	Phospho (STY)	sp|P31948|STIP1_HUMAN	1		_KLSVPT(ph)S(ph)DEEDEVPAPKPR_	2 Phospho (STY)	sp|Q8NE71|ABCF1_HUMAN	1
_DAAAHLQTSHKPSAEDAEGQS(ph)PLSQK_	2 Phospho (STY)	sp|Q96F24|NRBF2_HUMAN	0.995		_DHS(ph)PT(ph)PSVFNSDEER_	Phospho (STY)	sp|Q6UN15|FIP1_HUMAN	0.807		_DGGS(ph)GNSTIIVSR_	Phospho (STY)	sp|Q7Z6Z7|HUWE1_HUMAN	1		_DIQRPDSEHGLS(ph)PDSENFDWK_	Phospho (STY)	sp|P25054|APC_HUMAN	0.978		_DLFDYS(ph)PPLHK_	Phospho (STY)	sp|Q9NYF8|BCLF1_HUMAN	1		_EEAPAS(ph)PLRPLYPQIS(ph)PLK_	2 Phospho (STY)	sp|P85037|FOXK1_HUMAN	1		_FSGEEGEIEDDES(ph)GTENREEK_	Phospho (STY)	sp|Q9Y2W1|TR150_HUMAN	0.991		_GPKPEPPGS(ph)GS(ph)PAPPR_	2 Phospho (STY)	sp|Q9UKJ3|GPTC8_HUMAN	1		_HGGS(ph)PQPLATTPLSQEPVNPPSEAS(ph)PTR_	2 Phospho (STY)	sp|Q9UQ35|SRRM2_HUMAN	0.944		_KLT(ph)S(ph)DEEGEPSGK_	2 Phospho (STY)	sp|Q8WVC0|LEO1_HUMAN	1
_DAASKPSGEGSFSKPGDGGS(ph)PSKPSDHEPPK_	Phospho (STY)	sp|O14654|IRS4_HUMAN	0.972		_DHS(ph)PTPS(ph)VFNSDEER_	Phospho (STY)	sp|Q6UN15|FIP1_HUMAN	0.974		_DGKFS(ph)PIQEK_	Phospho (STY)	sp|O43683|BUB1_HUMAN	1		_DITDPLSLNTCTDEGHVVLAS(ph)PLK_	Phospho (STY)	sp|Q7L2J0|MEPCE_HUMAN	0.912		_DLFNGLDS(ph)EEEK_	Phospho (STY)	sp|Q96S90|LYSM1_HUMAN	1		_EEAS(ph)DDDM(ox)EGDEAVVR_	Oxidation (M),Phospho (STY)	sp|O75643|U520_HUMAN	1		_FSKEEPVS(ph)S(ph)GPEEAVGK_	2 Phospho (STY)	sp|O00567|NOP56_HUMAN	1		_GPKPEPPGSGS(ph)PAPPR_	Phospho (STY)	sp|Q9UKJ3|GPTC8_HUMAN	0.955		_HGGSPQPLATTPLSQEPVNPPSEAS(ph)PTR_	Phospho (STY)	sp|Q9UQ35|SRRM2_HUMAN	0.891		_KLTS(ph)DEEGEPSGK_	Phospho (STY)	sp|Q8WVC0|LEO1_HUMAN	0.9
_DADLS(ph)PVNASIIK_	Phospho (STY)	sp|O75970|MPDZ_HUMAN	1		_DHS(ph)PTPS(ph)VFNSDEERYR_	Phospho (STY)	sp|Q6UN15|FIP1_HUMAN	0.909		_DGLAPEKT(ph)SPDRDK_	Phospho (STY)	sp|Q7L4I2|RSRC2_HUMAN	0.819		_DKEIS(ph)PSVTK_	Phospho (STY)	sp|Q8N488|RYBP_HUMAN	0.951		_DLFSLDSEDPSPAS(ph)PPLR_	Phospho (STY)	sp|Q9BTK6|PAGR1_HUMAN	1		_EEAS(ph)DDDMEGDEAVVR_	Phospho (STY)	sp|O75643|U520_HUMAN	1		_FTDKDQQPS(ph)GS(ph)EGEDDDAEAALKK_	2 Phospho (STY)	sp|Q9NXG2|THUM1_HUMAN	0.999		_GPPDFS(ph)S(ph)DEEREPT(ph)PVLGSGAAAAGR_	3 Phospho (STY)	sp|P42167|LAP2B_HUMAN	0.878		_HGLQLGAQS(ph)PGR_	Phospho (STY)	sp|Q8N1G0|ZN687_HUMAN	1		_KM(ox)S(ph)QPGS(ph)PSPK_	Oxidation (M),2 Phospho (STY)	sp|Q14839|CHD4_HUMAN	0.968
_DAELQDQEFGKRDS(ph)LGTYSSR_	Phospho (STY)	sp|Q9C0C2|TB182_HUMAN	0.804		_DHS(ph)PTPSVFNS(ph)DEER_	Phospho (STY)	sp|Q6UN15|FIP1_HUMAN	0.907		_DGLAPEKTS(ph)PDRDK_	Phospho (STY)	sp|Q7L4I2|RSRC2_HUMAN	0.928		_DKEVS(ph)DDEAEEK_	Phospho (STY)	sp|P07900|HS90A_HUMAN	1		_DLGSTEDGDGT(ph)DDFLTDKEDEK_	Phospho (STY)	sp|Q15527|SURF2_HUMAN	1		_EEATYGVWAERDS(ph)DDERPSFGGK_	Phospho (STY)	sp|Q9UBB9|TFP11_HUMAN	1		_GAAEEAELEDS(ph)DDEEKPVK_	Phospho (STY)	sp|Q9UBB9|TFP11_HUMAN	1		_GPPDFS(ph)S(ph)DEEREPTPVLGSGAAAAGR_	2 Phospho (STY)	sp|P42167|LAP2B_HUMAN	1		_HIKEEPLS(ph)EEEPCTSTAIAS(ph)PEK_	2 Phospho (STY)	sp|Q9Y2X3|NOP58_HUMAN	1		_KNS(ph)STDQGS(ph)DEEGSLQK_	2 Phospho (STY)	sp|Q12789|TF3C1_HUMAN	0.993
_DAEPQPGSPAAES(ph)LEEPDAAAGLSSTK_	Phospho (STY)	sp|Q9H9J4|UBP42_HUMAN	0.85		_DHS(ph)PTPSVFNS(ph)DEERYR_	Phospho (STY)	sp|Q6UN15|FIP1_HUMAN	0.974		_DGLNQTTIPVS(ph)PPSTTKPSR_	Phospho (STY)	sp|Q71RC2|LARP4_HUMAN	0.999		_DKFS(ph)PFPVQDRPESSLVFK_	Phospho (STY)	sp|Q9UQ35|SRRM2_HUMAN	1		_DLLHPS(ph)PEEEK_	Phospho (STY)	sp|P42677|RS27_HUMAN	1		_EEDCHS(ph)PTSKPPKPDQPLK_	Phospho (STY)	sp|P23588|IF4B_HUMAN	0.97		_GAAEEAELEDS(ph)DDEEKPVKQDDFPK_	Phospho (STY)	sp|Q9UBB9|TFP11_HUMAN	1		_GPPS(ph)PPAPVM(ox)HS(ph)PSR_	Oxidation (M),2 Phospho (STY)	sp|Q13573|SNW1_HUMAN	0.987		_HIKEEPLS(ph)EEEPCTSTAIASPEK_	Phospho (STY)	sp|Q9Y2X3|NOP58_HUMAN	1		_KPAQEETEETS(ph)SQESAEED_	Phospho (STY)	sp|P52926|HMGA2_HUMAN	0.951
_DAEYIYPS(ph)LESDDDDPALK_	Phospho (STY)	sp|Q9UPP1|PHF8_HUMAN	0.83		_DHS(ph)PTPSVFNSDEER_	Phospho (STY)	sp|Q6UN15|FIP1_HUMAN	1		_DGPGLERS(ph)PGEPGGAAPER_	Phospho (STY)	sp|Q96EB6|SIR1_HUMAN	1		_DKMEGS(ph)DFESSGGR_	Phospho (STY)	sp|Q8WYH8|ING5_HUMAN	0.995		_DLLPS(ph)PAGPVPSK_	Phospho (STY)	sp|Q9UHB7|AFF4_HUMAN	1		_EEDEEPES(ph)PPEK_	Phospho (STY)	sp|Q9H1E3|NUCKS_HUMAN	1		_GADNDGS(ph)GSESGYTTPK_	Phospho (STY)	sp|Q7Z417|NUFP2_HUMAN	0.999		_GPPS(ph)PPAPVM(ox)HS(ph)PSRK_	Oxidation (M),2 Phospho (STY)	sp|Q13573|SNW1_HUMAN	0.993		_HIKEEPLSEEEPCTSTAIAS(ph)PEK_	Phospho (STY)	sp|Q9Y2X3|NOP58_HUMAN	1		_KPAQEETEETSS(ph)QESAEED_	Phospho (STY)	sp|P52926|HMGA2_HUMAN	0.819
_DAEYIYPSLES(ph)DDDDPALK_	Phospho (STY)	sp|Q9UPP1|PHF8_HUMAN	1		_DHS(ph)PTPSVFNSDEERYR_	Phospho (STY)	sp|Q6UN15|FIP1_HUMAN	0.996		_DGPYIT(ph)AEEAVAVYTT(ph)T(ph)VHWLESR_	3 Phospho (STY)	sp|Q6P2Q9|PRP8_HUMAN	0.81		_DKRPLS(ph)GPDVGTPQPAGLASGAK_	2 Phospho (STY)	sp|O96013|PAK4_HUMAN	1		_DLLPSGSRDEPPPASQSTSQDCSQALKQS(ph)P_	Phospho (STY)	sp|Q5JRA6|MIA3_HUMAN	1		_EEDEEPES(ph)PPEKK_	Phospho (STY)	sp|Q9H1E3|NUCKS_HUMAN	1		_GADS(ph)GEEKEEGINR_	Phospho (STY)	sp|Q9BVG4|PBDC1_HUMAN	1		_GPPS(ph)PPAPVMHS(ph)PSR_	2 Phospho (STY)	sp|Q13573|SNW1_HUMAN	0.818		_HIVSNDSSDS(ph)DDESHEPK_	Phospho (STY)	sp|P47712|PA24A_HUMAN	0.977		_KPAQEETEETSSQES(ph)AEED_	Phospho (STY)	sp|P52926|HMGA2_HUMAN	1
_DAGGPRPES(ph)PVPAGR_	Phospho (STY)	sp|Q9BVG9|PTSS2_HUMAN	1		_DHYQDPVPGIT(ph)PSSSSR_	Phospho (STY)	sp|Q7KZ85|SPT6H_HUMAN	0.993		_DGQDAIAQS(ph)PEK_	Phospho (STY)	sp|Q9NWH9|SLTM_HUMAN	1		_DKS(ph)PVREPIDNLTPEER_	Phospho (STY)	sp|Q14498|RBM39_HUMAN	1		_DLLSDLQDIS(ph)DSER_	Phospho (STY)	sp|Q9UQ88|CD11A_HUMAN	0.923		_EEDEPEERS(ph)GDETPGSEVPGDK_	Phospho (STY)	sp|Q1KMD3|HNRL2_HUMAN	1		_GADS(ph)GEEKEEGINREDK_	Phospho (STY)	sp|Q9BVG4|PBDC1_HUMAN	1		_GPPS(ph)PPAPVMHS(ph)PSRK_	2 Phospho (STY)	sp|Q13573|SNW1_HUMAN	0.862		_HLQS(ph)LHKFVSR_	Phospho (STY)	sp|Q9UPN3|MACF1_HUMAN	1		_KPATPAEDDEDDDIDLFGS(ph)DNEEEDK_	Phospho (STY)	sp|P29692|EF1D_HUMAN	1
_DALGDSLQVPVS(ph)PSSTTSSR_	Phospho (STY)	sp|Q9Y2D5|AKAP2_HUMAN	0.887		_DIDHETVVEEQIIGENS(ph)PPDYSEYM(ox)TGK_	Phospho (STY)	sp|P25490|TYY1_HUMAN	0.985		_DGQVINET(ph)SQHHDDLE_	Phospho (STY)	sp|P08670|VIME_HUMAN	0.98		_DKVEENS(ph)VRSPR_	2 Phospho (STY)	sp|Q92576|PHF3_HUMAN	0.964		_DLPAQRGEES(ph)S(ph)EEEEK_	2 Phospho (STY)	sp|Q9BW71|HIRP3_HUMAN	1		_EEDGADAS(ph)EEDLTR_	Phospho (STY)	sp|Q86X53|ERIC1_HUMAN	1		_GAEETSWS(ph)GEER_	Phospho (STY)	sp|Q9H7N4|SFR19_HUMAN	1		_GPPS(ph)PPAPVMHSPS(ph)RK_	2 Phospho (STY)	sp|Q13573|SNW1_HUMAN	0.97		_HNS(ph)WSSSSR_	Phospho (STY)	sp|Q96F86|EDC3_HUMAN	0.999		_KPGPPLS(ph)PEIRS(ph)PAGS(ph)PELR_	3 Phospho (STY)	sp|Q96JM3|CHAP1_HUMAN	1
_DAPIS(ph)PASIASSSSTPSSK_	2 Phospho (STY)	sp|Q04727|TLE4_HUMAN	1		_DIDISS(ph)PEFK_	2 Phospho (STY)	sp|Q09666|AHNK_HUMAN	0.975		_DGSS(ph)PPLLEK_	Phospho (STY)	sp|Q6W2J9|BCOR_HUMAN	0.991		_DKY(ph)EAELSELEQS(ph)ERK_	2 Phospho (STY)	sp|Q9UPN4|CP131_HUMAN	0.997		_DLPDGHAAS(ph)PR_	Phospho (STY)	sp|Q9P1Y5|CAMP3_HUMAN	1		_EEEDKDDEEKPKIEDVGS(ph)DEEDDSGK_	Phospho (STY)	sp|P08238|HS90B_HUMAN	1		_GAES(ph)PFEEK_	Phospho (STY)	sp|P46821|MAP1B_HUMAN	1		_GPRT(ph)PS(ph)PPPPIPEDIALGK_	2 Phospho (STY)	sp|Q5T200|ZC3HD_HUMAN	1		_HRPS(ph)PPAT(ph)PPPK_	2 Phospho (STY)	sp|Q8IYB3|SRRM1_HUMAN	1		_KPIET(ph)GSPK_	Phospho (STY)	sp|Q05519|SRS11_HUMAN	0.951
_DAPTS(ph)PASVASSSSTPSSK_	Phospho (STY)	sp|Q04726|TLE3_HUMAN	0.997		_DIEIS(ph)T(ph)EEEK_	Phospho (STY)	sp|Q4G0J3|LARP7_HUMAN	1		_DGTAPPPQSPGSPGTGQDEEWS(ph)DEESPRK_	Phospho (STY)	sp|Q9UKS6|PACN3_HUMAN	0.998		_DKYAY(ph)T(ph)KQK_	Phospho (STY)	sp|Q92835|SHIP1_HUMAN	0.991		_DLPS(ph)PDSR_	Phospho (STY)	sp|Q9UGU0|TCF20_HUMAN	0.994		_EEETS(ph)IDVAGKPNEVTK_	Phospho (STY)	sp|P53985|MOT1_HUMAN	0.992		_GAGDGS(ph)DEEVDGK_	Phospho (STY)	sp|P35579|MYH9_HUMAN	1		_GPRT(ph)PS(ph)PPPPIPEDIALGKK_	2 Phospho (STY)	sp|Q5T200|ZC3HD_HUMAN	1		_HSS(ph)IS(ph)PVRLPLNSSLGAELSR_	2 Phospho (STY)	sp|Q9NYV4|CDK12_HUMAN	0.94		_KPPAPPS(ph)PVQSQS(ph)PSTNWSPAVPVK_	2 Phospho (STY)	sp|Q8IYB3|SRRM1_HUMAN	0.957
_DAQRLS(ph)PIPEEVPK_	Phospho (STY)	sp|Q96T23|RSF1_HUMAN	1		_DIEIS(ph)T(ph)EEEKDTGDLK_	2 Phospho (STY)	sp|Q4G0J3|LARP7_HUMAN	1		_DGTS(ph)PEEEIEIER_	Phospho (STY)	sp|Q9H501|ESF1_HUMAN	0.954		_DLDEDELLGNLS(ph)ETELK_	Oxidation (M),Phospho (STY)	sp|Q9NYL9|TMOD3_HUMAN	0.952		_DLQEQDADAGS(ph)ER_	Phospho (STY)	sp|Q6P158|DHX57_HUMAN	1		_EEEWDPEYT(ph)PK_	Phospho (STY)	sp|Q9NYF8|BCLF1_HUMAN	1		_GAGDGS(ph)DEEVDGKADGAEAKPAE_	Phospho (STY)	sp|P35579|MYH9_HUMAN	1		_GPS(ph)PAPAS(ph)SPKR_	2 Phospho (STY)	sp|Q9H7N4|SFR19_HUMAN	0.827		_HSSVSDSQPCEPPSVGTEYSQGAS(ph)PQPQHQLK_	Phospho (STY)	sp|P39880|CUX1_HUMAN	0.912		_KPVTVS(ph)PTTPT(ph)SPTEGEAS_	2 Phospho (STY)	sp|Q9Y6G9|DC1L1_HUMAN	0.917
_DAS(ph)DDLDDLNFFNQK_	Phospho (STY)	sp|P20042|IF2B_HUMAN	1		_DIEVLS(ph)EDT(ph)DYEEDEVTK_	2 Phospho (STY)	sp|Q4LE39|ARI4B_HUMAN	0.993		_DGVLTLANNVT(ph)PAK_	Phospho (STY)	sp|P27816|MAP4_HUMAN	1		_DLDEEGS(ph)EK_	Oxidation (M),2 Phospho (STY)	sp|O43719|HTSF1_HUMAN	1		_DLQS(ph)PDFTTGFHSDK_	Phospho (STY)	sp|Q9P2D0|IBTK_HUMAN	0.999		_EEGS(ph)DIEDEDMEELLNDTR_	Phospho (STY)	sp|Q8NHQ9|DDX55_HUMAN	1		_GAVAAEGASDT(ph)EREEPTESQGLAAR_	Phospho (STY)	sp|Q9P1Y6|PHRF1_HUMAN	0.993		_GPS(ph)PAPASS(ph)PKR_	2 Phospho (STY)	sp|Q9H7N4|SFR19_HUMAN	0.951		_HTGPNS(ph)PDTANDGFVR_	Phospho (STY)	sp|P31943|HNRH1_HUMAN	1		_KPVTVS(ph)PTTPTS(ph)PTEGEAS_	2 Phospho (STY)	sp|Q9Y6G9|DC1L1_HUMAN	0.865
_DAS(ph)PINRWS(ph)PTR_	Phospho (STY)	sp|Q13523|PRP4B_HUMAN	1		_DIEVLS(ph)EDT(ph)DYEEDEVTKK_	3 Phospho (STY)	sp|Q4LE39|ARI4B_HUMAN	0.91		_DGWS(ph)LDRDRGDR_	Phospho (STY)	sp|Q96T37|RBM15_HUMAN	1		_DLDRPESQS(ph)PK_	Phospho (STY)	sp|Q8WUA4|TF3C2_HUMAN	1		_DLQYIT(ph)VSK_	Phospho (STY)	sp|P55196|AFAD_HUMAN	0.968		_EEGS(ph)LSDTEADAVSGQLPDPTTNPSAGK_	Phospho (STY)	sp|Q8N1G4|LRC47_HUMAN	0.814		_GDDDEES(ph)DEEAVKK_	Phospho (STY)	sp|O43395|PRPF3_HUMAN	1		_GPS(ph)PS(ph)SPTPPAAAAPAEQAPR_	2 Phospho (STY)	sp|Q86VQ1|GLCI1_HUMAN	0.857		_IAAPELHKGDS(ph)DS(ph)EEDEPTK_	2 Phospho (STY)	sp|Q92733|PRCC_HUMAN	1		_KQETAAVCGET(ph)DEEAGES(ph)GGEGIFR_	2 Phospho (STY)	sp|Q9ULL5|PRR12_HUMAN	0.998
_DASSS(ph)PASTASSASSTSLK_	Phospho (STY)	sp|Q04724|TLE1_HUMAN	0.949		_DIFYYEDDS(ph)EGEDIEK_	2 Phospho (STY)	sp|Q15361|TTF1_HUMAN	1		_DGYGGSRDS(ph)YSSSR_	Phospho (STY)	sp|P38159|RBMX_HUMAN	0.99		_DLEPGEVPS(ph)DSDEDGEHK_	Phospho (STY)	sp|Q96T58|MINT_HUMAN	0.843		_DLS(ph)LEEIQK_	Phospho (STY)	sp|P16949|STMN1_HUMAN	1		_EEHGGLIRS(ph)PR_	Phospho (STY)	sp|P26368|U2AF2_HUMAN	1		_GDPPRLS(ph)PDPVAGSAVSQELR_	Phospho (STY)	sp|Q9BUR4|WAP53_HUMAN	1		_GPS(ph)PSPVGS(ph)PASVAQSR_	2 Phospho (STY)	sp|O14497|ARI1A_HUMAN	0.995		_IDASKNEEDEGHSNSS(ph)PR_	Phospho (STY)	sp|Q14103|HNRPD_HUMAN	0.997		_KQS(ph)FDDNDS(ph)EELEDKDSK_	2 Phospho (STY)	sp|O60841|IF2P_HUMAN	1
_DASTS(ph)PPNRETIGSAQCK_	Phospho (STY)	sp|Q15154|PCM1_HUMAN	0.81		_DIIRQPS(ph)EEEIIK_	Phospho (STY)	sp|Q15121|PEA15_HUMAN	1		_DHANYEEDENGDIT(ph)PIK_	Phospho (STY)	sp|Q99547|MPH6_HUMAN	1		_DLESCS(ph)DDDNQGSK_	Phospho (STY)	sp|Q5T3I0|GPTC4_HUMAN	1		_DLS(ph)PEPAPDEGPR_	Phospho (STY)	sp|Q8TBE0|BAHD1_HUMAN	1		_EEKETNADWDGRPT(ph)K_	Phospho (STY)	sp|Q5CZC0|FSIP2_HUMAN	1		_GDQPAASGDS(ph)DDDEPPPLPR_	Phospho (STY)	sp|O00264|PGRC1_HUMAN	0.999		_GPS(ph)PSPVGSPASVAQSR_	Phospho (STY)	sp|O14497|ARI1A_HUMAN	1		_IDDRDS(ph)DEEGASDR_	Phospho (STY)	sp|Q8TDD1|DDX54_HUMAN	1		_KQSFDDNDS(ph)EELEDK_	Phospho (STY)	sp|O60841|IF2P_HUMAN	1
_DCLIEDS(ph)DDEAGQS_	Phospho (STY)	sp|Q2VPK5|CTU2_HUMAN	1		_DIKEES(ph)DEEEEDDEESGRLR_	3 Phospho (STY)	sp|Q96EV2|RBM33_HUMAN	1		_DHFGLEGDEESTM(ox)LEDSVS(ph)PKK_	Oxidation (M),Phospho (STY)	sp|Q9Y490|TLN1_HUMAN	0.873		_DLFDLNS(ph)SEEDDTEGFSER_	Phospho (STY)	sp|Q9Y3T9|NOC2L_HUMAN	0.842		_DLS(ph)TSPKPSPIPS(ph)PVLGR_	2 Phospho (STY)	sp|Q8NDI1|EHBP1_HUMAN	0.853		_EELM(ox)S(ph)SDLEETAGSTSIPK_	Oxidation (M),Phospho (STY)	sp|O00567|NOP56_HUMAN	0.841		_GDS(ph)ES(ph)EEDEDLEVPVPSR_	2 Phospho (STY)	sp|P13861|KAP2_HUMAN	1		_GPTTGEGALDLSDVHS(ph)PPKS(ph)PEGK_	2 Phospho (STY)	sp|O95684|FR1OP_HUMAN	0.986		_IDEDGENTQIEDTEPMS(ph)PVLNSK_	Phospho (STY)	sp|Q12888|TP53B_HUMAN	1		_KQSFDDNDS(ph)EELEDKDSK_	Phospho (STY)	sp|O60841|IF2P_HUMAN	0.991
_DDEEKPKIEDVGS(ph)DEEDDSGK_	Phospho (STY)	sp|P08238|HS90B_HUMAN	1		_DIPRT(ph)PSR_	Phospho (STY)	sp|Q9UQ35|SRRM2_HUMAN	1		_DHS(ph)DS(ph)DDQM(ox)LVAK_	Oxidation (M),2 Phospho (STY)	sp|Q9NW75|GPTC2_HUMAN	1		_DLFDYS(ph)PPLHK_	Phospho (STY)	sp|Q9NYF8|BCLF1_HUMAN	1		_DLVLPTQALPAS(ph)PALK_	Phospho (STY)	sp|Q15554|TERF2_HUMAN	1		_EELM(ox)SS(ph)DLEETAGSTSIPK_	Oxidation (M),Phospho (STY)	sp|O00567|NOP56_HUMAN	0.994		_GDVTAEEAAGAS(ph)PAK_	Phospho (STY)	sp|P49006|MRP_HUMAN	1		_GQTPLTEGS(ph)EDLDGHS(ph)DPEESFAR_	2 Phospho (STY)	sp|Q86VR2|F134C_HUMAN	0.9		_IDIS(ph)PSTFR_	Phospho (STY)	sp|Q9Y2W1|TR150_HUMAN	1		_KRES(ph)ES(ph)ES(ph)DETPPAAPQLIK_	3 Phospho (STY)	sp|O60832|DKC1_HUMAN	1
_DDFES(ph)EEEDVK_	Phospho (STY)	sp|Q7Z6E9|RBBP6_HUMAN	1		_DIYLS(ph)PDR_	Phospho (STY)	sp|Q15696|U2AFM_HUMAN	1		_DHS(ph)PTPS(ph)VFNSDEER_	2 Phospho (STY)	sp|Q6UN15|FIP1_HUMAN	0.992		_DLFSLDSEDPSPAS(ph)PPLR_	Phospho (STY)	sp|Q9BTK6|PAGR1_HUMAN	1		_DLVQPDKPAS(ph)PK_	Phospho (STY)	sp|Q6PJT7|ZC3HE_HUMAN	1		_EELMS(ph)SDLEETAGSTSIPK_	Phospho (STY)	sp|O00567|NOP56_HUMAN	0.818		_GEAAAERPGEAAVASSPS(ph)K_	Phospho (STY)	sp|P29966|MARCS_HUMAN	0.813		_GRDS(ph)PYQSR_	Phospho (STY)	sp|Q13242|SRSF9_HUMAN	0.986		_IDIS(ph)PSTLR_	Phospho (STY)	sp|Q9NYF8|BCLF1_HUMAN	1		_KRES(ph)ES(ph)ESDETPPAAPQLIK_	2 Phospho (STY)	sp|O60832|DKC1_HUMAN	0.978
_DDGSSM(ox)SFYVRPS(ph)PAK_	Phospho (STY)	sp|Q9NYB0|TE2IP_HUMAN	1		_DKAPVQPQQS(ph)PAAAPGGTDEKPSGK_	Phospho (STY)	sp|Q13200|PSMD2_HUMAN	1		_DHS(ph)PTPS(ph)VFNSDEERYR_	2 Phospho (STY)	sp|Q6UN15|FIP1_HUMAN	0.916		_DLGSTEDGDGT(ph)DDFLTDKEDEK_	Phospho (STY)	sp|Q15527|SURF2_HUMAN	1		_DM(ox)DEPS(ph)PVPNVEEVTLPK_	Oxidation (M),Phospho (STY)	sp|Q8TAQ2|SMRC2_HUMAN	1		_EELMSS(ph)DLEETAGSTSIPK_	Phospho (STY)	sp|O00567|NOP56_HUMAN	0.965		_GEEGS(ph)DDDETENGPKPK_	Phospho (STY)	sp|Q6PD62|CTR9_HUMAN	1		_GRECS(ph)PTS(ph)SLER_	2 Phospho (STY)	sp|Q9P1Y6|PHRF1_HUMAN	0.973		_IDIS(ph)PSTLRK_	Phospho (STY)	sp|Q9NYF8|BCLF1_HUMAN	0.996		_KRS(ph)PS(ph)PSPTPEAK_	2 Phospho (STY)	sp|Q8TAQ2|SMRC2_HUMAN	0.966
_DDPDGKQEAKPQQAAGM(ox)LS(ph)PK_	2 Phospho (STY)	sp|Q13428|TCOF_HUMAN	1		_DKDVTLS(ph)PVK_	Phospho (STY)	sp|Q8NFC6|BD1L1_HUMAN	0.989		_DHS(ph)PTPSVFNS(ph)DEERYR_	2 Phospho (STY)	sp|Q6UN15|FIP1_HUMAN	0.997		_DLLHPS(ph)PEEEK_	Phospho (STY)	sp|P42677|RS27_HUMAN	1		_DM(ox)ES(ph)PTKLDVTLAK_	Oxidation (M),Phospho (STY)	sp|P27816|MAP4_HUMAN	0.999		_EELQANGSAPAADKEEPAAAGSGAAS(ph)PSAAEK_	Phospho (STY)	sp|P29966|MARCS_HUMAN	0.943		_GEFSAS(ph)PM(ox)LK_	Oxidation (M),Phospho (STY)	sp|Q9UQ35|SRRM2_HUMAN	1		_GRECS(ph)PTSS(ph)LER_	2 Phospho (STY)	sp|Q9P1Y6|PHRF1_HUMAN	0.985		_IDTHPS(ph)PSHSSTVK_	Phospho (STY)	sp|Q8NI27|THOC2_HUMAN	0.997		_KRSY(ph)S(ph)PDGK_	2 Phospho (STY)	sp|P43243|MATR3_HUMAN	0.842
_DDPDGKQEAKPQQAAGMLS(ph)PK_	Phospho (STY)	sp|Q13428|TCOF_HUMAN	1		_DKEDS(ph)DELEEGRGGVSEGEPDPADPK_	Phospho (STY)	sp|Q8IZ40|RCOR2_HUMAN	0.9		_DHS(ph)PTPSVFNSDEER_	Phospho (STY)	sp|Q6UN15|FIP1_HUMAN	1		_DLLPS(ph)PAGPVPSK_	Phospho (STY)	sp|Q9UHB7|AFF4_HUMAN	0.999		_DM(ox)PGGFLFEGLS(ph)DDEDDFHPNTR_	Oxidation (M),Phospho (STY)	sp|Q96S82|UBL7_HUMAN	0.999		_EENPES(ph)DGEPVVEDGTSVK_	Phospho (STY)	sp|Q13439|GOGA4_HUMAN	1		_GEGDAPFSEPGTTSTQRPS(ph)S(ph)PETATK_	2 Phospho (STY)	sp|Q9UQ35|SRRM2_HUMAN	0.932		_GRLS(ph)PVPVPR_	Phospho (STY)	sp|Q9UKM9|RALY_HUMAN	1		_IEDVGS(ph)DEEDDSGK_	Phospho (STY)	sp|P08238|HS90B_HUMAN	1		_KS(ph)PSGPVKS(ph)PPLS(ph)PVGTTPVK_	3 Phospho (STY)	sp|Q9BVC5|ASHWN_HUMAN	0.892
_DEALQNIS(ph)ADDLPDSASQAAHPQDSAFSYR_	Phospho (STY)	sp|Q14C86|GAPD1_HUMAN	0.999		_DKEDSDELEEGRGGVS(ph)EGEPDPADPK_	Phospho (STY)	sp|Q8IZ40|RCOR2_HUMAN	0.991		_DHS(ph)PTPSVFNSDEERYR_	Phospho (STY)	sp|Q6UN15|FIP1_HUMAN	0.999		_DLLPSGSRDEPPPASQSTSQDCSQALKQS(ph)P_	Phospho (STY)	sp|Q5JRA6|MIA3_HUMAN	0.999		_DMES(ph)PTKLDVTLAK_	Phospho (STY)	sp|P27816|MAP4_HUMAN	0.997		_EEPDSENIPQELLSNLGHPES(ph)PPRK_	Phospho (STY)	sp|Q13309|SKP2_HUMAN	1		_GEPAAAAAPEAGAS(ph)PVEK_	Phospho (STY)	sp|P29966|MARCS_HUMAN	1		_GRLT(ph)PS(ph)PDIIVLS(ph)DNEASSPR_	3 Phospho (STY)	sp|Q8WXI9|P66B_HUMAN	0.997		_IEDVGS(ph)DEEDDSGKDK_	Phospho (STY)	sp|P08238|HS90B_HUMAN	1		_KS(ph)PVGKS(ph)PPSTGSTYGSSQK_	2 Phospho (STY)	sp|Q9Y2W1|TR150_HUMAN	1
_DEILPTT(ph)PISEQK_	Phospho (STY)	sp|P23396|RS3_HUMAN	0.999		_DKEIS(ph)PSVTK_	Phospho (STY)	sp|Q8N488|RYBP_HUMAN	0.941		_DHSDS(ph)DDQMLVAK_	Phospho (STY)	sp|Q9NW75|GPTC2_HUMAN	0.951		_DLLSDLQDIS(ph)DSER_	Phospho (STY)	sp|P21127|CD11B_HUMAN	0.954		_DNDS(ph)ESDYM(ox)FM(ox)APGAGAIPK_	2 Oxidation (M),Phospho (STY)	sp|O14654|IRS4_HUMAN	0.992		_EEPLS(ph)EEEPCTSTAIAS(ph)PEK_	2 Phospho (STY)	sp|Q9Y2X3|NOP58_HUMAN	1		_GEPNVS(ph)YICSR_	Phospho (STY)	sp|P49841|GSK3B_HUMAN	0.908		_GRLT(ph)PS(ph)PDIIVLSDNEASS(ph)PR_	3 Phospho (STY)	sp|Q8WXI9|P66B_HUMAN	0.956		_IEEVLSPEGS(ph)PSKS(ph)PSK_	2 Phospho (STY)	sp|Q9UEY8|ADDG_HUMAN	0.963		_KSTYFS(ph)DEEELS(ph)D_	2 Phospho (STY)	sp|Q8TBF4|ZCRB1_HUMAN	1
_DELHIVEAEAM(ox)NYEGS(ph)PIK_	Phospho (STY)	sp|P06748|NPM_HUMAN	1		_DKEISPS(ph)VTK_	Phospho (STY)	sp|Q8N488|RYBP_HUMAN	0.845		_DIDISS(ph)PEFK_	Phospho (STY)	sp|Q09666|AHNK_HUMAN	0.95		_DLPAQRGEES(ph)S(ph)EEEEK_	Phospho (STY)	sp|Q9BW71|HIRP3_HUMAN	1		_DNDS(ph)ESDYMFM(ox)APGAGAIPK_	Oxidation (M),Phospho (STY)	sp|O14654|IRS4_HUMAN	0.911		_EEPLS(ph)EEEPCTSTAIASPEK_	Phospho (STY)	sp|Q9Y2X3|NOP58_HUMAN	1		_GEQVSQNGLPAEQGS(ph)PR_	Phospho (STY)	sp|Q01082|SPTB2_HUMAN	1		_GRLTPS(ph)PDIIVLS(ph)DNEASS(ph)PR_	3 Phospho (STY)	sp|Q8WXI9|P66B_HUMAN	0.938		_IEEVLSPEGSPSKS(ph)PSK_	Phospho (STY)	sp|Q9UEY8|ADDG_HUMAN	1		_KVEEDLKADEPS(ph)S(ph)EES(ph)DLEIDK_	3 Phospho (STY)	sp|P50502|F10A1_HUMAN	1
_DELNAT(ph)LKEEM(ox)R_	Phospho (STY)	sp|Q96ST8|CEP89_HUMAN	1		_DKEPFTFSS(ph)PASGR_	Phospho (STY)	sp|Q6P1X5|TAF2_HUMAN	0.996		_DIEIS(ph)T(ph)EEEK_	2 Phospho (STY)	sp|Q4G0J3|LARP7_HUMAN	1		_DLPDGHAAS(ph)PR_	Phospho (STY)	sp|Q9P1Y5|CAMP3_HUMAN	1		_DNEEREQSSDLTPS(ph)GDVS(ph)PVKPLSR_	2 Phospho (STY)	sp|Q8WYQ5|DGCR8_HUMAN	0.978		_EEPLSEEEPCTSTAIAS(ph)PEK_	Phospho (STY)	sp|Q9Y2X3|NOP58_HUMAN	1		_GESAEDKEHEEGRDS(ph)EEGPR_	Phospho (STY)	sp|Q7Z4V5|HDGR2_HUMAN	1		_GRLTPS(ph)PDIIVLSDNEASS(ph)PR_	2 Phospho (STY)	sp|Q8WXI9|P66B_HUMAN	0.884		_IENKTY(ph)T(ph)K_	2 Phospho (STY)	sp|Q8N1W1|ARG28_HUMAN	0.998		_KVEEDLKADEPS(ph)S(ph)EESDLEIDK_	2 Phospho (STY)	sp|P50502|F10A1_HUMAN	0.957
_DELTES(ph)PK_	Phospho (STY)	sp|Q8NC51|PAIRB_HUMAN	0.977		_DKEVS(ph)DDEAEEK_	Phospho (STY)	sp|P07900|HS90A_HUMAN	1		_DIEIS(ph)T(ph)EEEKDTGDLK_	2 Phospho (STY)	sp|Q4G0J3|LARP7_HUMAN	0.999		_DLQEQDADAGS(ph)ER_	Oxidation (M),Phospho (STY)	sp|Q6P158|DHX57_HUMAN	1		_DNEEREQSSDLTPSGDVS(ph)PVKPLSR_	Phospho (STY)	sp|Q8WYQ5|DGCR8_HUMAN	1		_EEPSQNDIS(ph)PK_	Phospho (STY)	sp|Q9NR30|DDX21_HUMAN	0.999		_GEVPPKET(ph)PK_	Phospho (STY)	sp|P49006|MRP_HUMAN	1		_GRSECDS(ph)S(ph)PEPK_	2 Phospho (STY)	sp|Q9UQ35|SRRM2_HUMAN	1		_IES(ph)DEEEDFENVGK_	Phospho (STY)	sp|Q96T23|RSF1_HUMAN	1		_KVEEEQEADEEDVS(ph)EEEAESK_	Phospho (STY)	sp|Q9H3N1|TMX1_HUMAN	1
_DFDIAEQNES(ph)SDEES(ph)LRK_	Phospho (STY)	sp|Q96KC8|DNJC1_HUMAN	0.944		_DKFS(ph)PFPVQDRPESSLVFK_	Phospho (STY)	sp|Q9UQ35|SRRM2_HUMAN	1		_DIEVLS(ph)EDT(ph)DYEEDEVTK_	2 Phospho (STY)	sp|Q4LE39|ARI4B_HUMAN	0.991		_DLQLLQGS(ph)K_	Oxidation (M),Phospho (STY)	sp|Q9NVI1|FANCI_HUMAN	1		_DNEESEQPPVPGT(ph)PTLR_	Phospho (STY)	sp|O15439|MRP4_HUMAN	0.997		_EEPVSS(ph)GPEEAVGK_	Phospho (STY)	sp|O00567|NOP56_HUMAN	0.992		_GFGS(ph)EEGSR_	Phospho (STY)	sp|Q9Y5S9|RBM8A_HUMAN	0.998		_GS(ph)ETPGAT(ph)PGSK_	2 Phospho (STY)	sp|O75533|SF3B1_HUMAN	0.933		_IES(ph)M(ox)VHQNGNKHCVFREK_	Oxidation (M),Phospho (STY)	sp|Q8ND71|GIMA8_HUMAN	1		_KVELS(ph)ES(ph)EEDK_	2 Phospho (STY)	sp|Q8IYB3|SRRM1_HUMAN	1
_DFQDYM(ox)EPEEGCQGS(ph)PQRR_	Phospho (STY)	sp|O43237|DC1L2_HUMAN	1		_DKM(ox)EGS(ph)DFESSGGR_	Phospho (STY)	sp|Q8WYH8|ING5_HUMAN	1		_DIEVLS(ph)EDT(ph)DYEEDEVTKK_	2 Phospho (STY)	sp|Q4LE39|ARI4B_HUMAN	1		_DLQS(ph)PDFTTGFHSDK_	Phospho (STY)	sp|Q9P2D0|IBTK_HUMAN	0.899		_DNPS(ph)PEPQLDDIKR_	Phospho (STY)	sp|Q96JC9|EAF1_HUMAN	1		_EEQTDTS(ph)DGESVTHHIR_	Phospho (STY)	sp|P36915|GNL1_HUMAN	0.852		_GFSQYGVSGS(ph)PTK_	Phospho (STY)	sp|Q9NXC5|MIO_HUMAN	0.977		_GS(ph)PHYFS(ph)PFRPY_	2 Phospho (STY)	sp|Q13242|SRSF9_HUMAN	1		_IET(ph)DEEESCDNAHGDANQPAR_	Phospho (STY)	sp|Q96T23|RSF1_HUMAN	1		_KVELS(ph)ES(ph)EEDKGGK_	2 Phospho (STY)	sp|Q8IYB3|SRRM1_HUMAN	1
_DFQEYVEPGEDFPAS(ph)PQR_	Oxidation (M),Phospho (STY)	sp|Q9Y6G9|DC1L1_HUMAN	1		_DKM(ox)EGSDFES(ph)SGGR_	Phospho (STY)	sp|Q8WYH8|ING5_HUMAN	0.975		_DIEVLS(ph)EDTDY(ph)EEDEVTK_	2 Phospho (STY)	sp|Q4LE39|ARI4B_HUMAN	0.803		_DLS(ph)LEEIQK_	Phospho (STY)	sp|P16949|STMN1_HUMAN	1		_DNQESS(ph)DAELS(ph)SSEYIK_	2 Phospho (STY)	sp|Q96JM3|CHAP1_HUMAN	0.975		_EES(ph)DGEYDEFGR_	Phospho (STY)	sp|O95218|ZRAB2_HUMAN	0.999		_GGDSIGET(ph)PT(ph)PGASK_	2 Phospho (STY)	sp|O75533|SF3B1_HUMAN	1		_GS(ph)PHYFSPFRPY_	Phospho (STY)	sp|Q13242|SRSF9_HUMAN	0.96		_IGEGT(ph)YGVVYK_	Phospho (STY)	sp|P06493|CDK1_HUMAN	0.946		_KVVVSPT(ph)K_	Phospho (STY)	sp|P19338|NUCL_HUMAN	0.954
_DFQEYVEPGEDFPAS(ph)PQRR_	Phospho (STY)	sp|Q9Y6G9|DC1L1_HUMAN	1		_DKMEGS(ph)DFESSGGR_	Phospho (STY)	sp|Q8WYH8|ING5_HUMAN	0.929		_DIFYYEDDS(ph)EGEDIEK_	Phospho (STY)	sp|Q15361|TTF1_HUMAN	1		_DLVLPTQALPAS(ph)PALK_	Phospho (STY)	sp|Q15554|TERF2_HUMAN	1		_DNQESS(ph)DAELSSSEYIK_	Phospho (STY)	sp|Q96JM3|CHAP1_HUMAN	0.953		_EES(ph)EES(ph)EAEPVQR_	2 Phospho (STY)	sp|Q9BW71|HIRP3_HUMAN	1		_GGDVS(ph)PSPYSSSSWR_	Phospho (STY)	sp|Q14004|CDK13_HUMAN	0.994		_GSET(ph)PGAT(ph)PGSK_	2 Phospho (STY)	sp|O75533|SF3B1_HUMAN	0.991		_IGEGTY(ph)GVVYK_	Phospho (STY)	sp|P06493|CDK1_HUMAN	0.985		_KWDGS(ph)EEDEDNSK_	Phospho (STY)	sp|O60841|IF2P_HUMAN	1
_DFQHLISS(ph)PLK_	2 Phospho (STY)	sp|Q15361|TTF1_HUMAN	0.951		_DKRPLS(ph)GPDVGTPQPAGLASGAK_	Phospho (STY)	sp|O96013|PAK4_HUMAN	1		_DIIRQPS(ph)EEEIIK_	Phospho (STY)	sp|Q15121|PEA15_HUMAN	1		_DLVQPDKPAS(ph)PK_	2 Phospho (STY)	sp|Q6PJT7|ZC3HE_HUMAN	1		_DNS(ph)PLREK_	Phospho (STY)	sp|Q5VUA4|ZN318_HUMAN	1		_EES(ph)EESEAEPVQR_	Phospho (STY)	sp|Q9BW71|HIRP3_HUMAN	1		_GGGGGQDNGLEGLGNDS(ph)R_	Phospho (STY)	sp|P08621|RU17_HUMAN	1		_GSFS(ph)DTGLGDGK_	Phospho (STY)	sp|Q9Y2W1|TR150_HUMAN	0.93		_IGELGAPEVWGLS(ph)PK_	Phospho (STY)	sp|Q8N5F7|NKAP_HUMAN	1		_KYES(ph)DEDS(ph)LGSSGR_	2 Phospho (STY)	sp|O00418|EF2K_HUMAN	0.985
_DGELPVEDDIDLS(ph)DVELDDLGK_	Phospho (STY)	sp|Q15084|PDIA6_HUMAN	1		_DKS(ph)PVREPIDNLTPEER_	2 Phospho (STY)	sp|Q14498|RBM39_HUMAN	1		_DIKEES(ph)DEEEEDDEESGRLR_	Phospho (STY)	sp|Q96EV2|RBM33_HUMAN	1		_DM(ox)DEPS(ph)PVPNVEEVTLPK_	Phospho (STY)	sp|Q8TAQ2|SMRC2_HUMAN	1		_DNS(ph)PPPAFKPEPPK_	Phospho (STY)	sp|Q9UDY2|ZO2_HUMAN	1		_EETNGPSNQKPVKS(ph)PDNSIK_	Phospho (STY)	sp|Q9UKL0|RCOR1_HUMAN	0.848		_GGGSAAAAAAAAASGGGVS(ph)PDNSIEHSDYR_	Phospho (STY)	sp|P40425|PBX2_HUMAN	0.993		_GSGDIS(ph)S(ph)DSIDHS(ph)PAKK_	3 Phospho (STY)	sp|Q9H5I1|SUV92_HUMAN	0.833		_IGQQVDREPGDVAT(ph)PPRK_	Phospho (STY)	sp|Q9Y5N6|ORC6_HUMAN	1		_KYQEDS(ph)DPERS(ph)DYEEQQLQK_	2 Phospho (STY)	sp|Q6P6C2|ALKB5_HUMAN	0.91
_DGETLEGS(ph)DAEESLDK_	Phospho (STY)	sp|Q9P2D1|CHD7_HUMAN	1		_DKVEENS(ph)VRSPR_	Phospho (STY)	sp|Q92576|PHF3_HUMAN	0.999		_DIPRT(ph)PSR_	Phospho (STY)	sp|Q9UQ35|SRRM2_HUMAN	1		_DM(ox)ES(ph)PTKLDVTLAK_	Phospho (STY)	sp|P27816|MAP4_HUMAN	1		_DNTFFRES(ph)PVGR_	Phospho (STY)	sp|Q8NEY8|PPHLN_HUMAN	1		_EFITGDVEPTDAESEWHS(ph)ENEEEEK_	Phospho (STY)	sp|Q99733|NP1L4_HUMAN	1		_GGLS(ph)PANDTGAK_	Phospho (STY)	sp|P30419|NMT1_HUMAN	1		_GSGDIS(ph)SDS(ph)IDHS(ph)PAKK_	3 Phospho (STY)	sp|Q9H5I1|SUV92_HUMAN	0.872		_IHRAS(ph)DPGLPAEEPK_	Phospho (STY)	sp|P27708|PYR1_HUMAN	1		_KYVIS(ph)DEEEEDDD_	Phospho (STY)	sp|Q8WVC0|LEO1_HUMAN	1
_DGGS(ph)GNSTIIVSR_	Phospho (STY)	sp|Q7Z6Z7|HUWE1_HUMAN	1		_DKVEENSVRS(ph)PR_	Phospho (STY)	sp|Q92576|PHF3_HUMAN	0.919		_DKAPVQPQQS(ph)PAAAPGGTDEKPSGK_	Phospho (STY)	sp|Q13200|PSMD2_HUMAN	1		_DMDEPS(ph)PVPNVEEVTLPK_	Oxidation (M),Phospho (STY)	sp|Q8TAQ2|SMRC2_HUMAN	1		_DPAQPM(ox)S(ph)PGEATQSGARPADR_	Oxidation (M),Phospho (STY)	sp|Q9BQG0|MBB1A_HUMAN	1		_EGAASPAPETPQPTS(ph)PETSPK_	Phospho (STY)	sp|Q9Y3X0|CCDC9_HUMAN	0.881		_GGS(ph)DDSSKDPIDVNYEK_	Phospho (STY)	sp|P09874|PARP1_HUMAN	0.972		_GSGDIS(ph)SDS(ph)IDHSPAK_	2 Phospho (STY)	sp|Q9H5I1|SUV92_HUMAN	0.993		_IKEEPVS(ph)EEGEEDEEQEAEEEPMDTSPSGLHSK_	Phospho (STY)	sp|Q9NVU0|RPC5_HUMAN	1		_LAEDEGDS(ph)EPEAVGQSR_	Phospho (STY)	sp|Q9UIG0|BAZ1B_HUMAN	1
_DGKFS(ph)PIQEK_	Phospho (STY)	sp|O43683|BUB1_HUMAN	1		_DKY(ph)EAELSELEQS(ph)ERK_	Phospho (STY)	sp|Q9UPN4|CP131_HUMAN	0.988		_DKDVTLS(ph)PVK_	Phospho (STY)	sp|Q8NFC6|BD1L1_HUMAN	0.919		_DMES(ph)PTKLDVTLAK_	Phospho (STY)	sp|P27816|MAP4_HUMAN	1		_DPLQNSPGS(ph)EGK_	Phospho (STY)	sp|Q6IE81|JADE1_HUMAN	0.974		_EGDPVSLSTPLETEFGSPSELS(ph)PR_	Phospho (STY)	sp|Q9BUR4|WAP53_HUMAN	0.995		_GGS(ph)REYDTGGGSSSSR_	Phospho (STY)	sp|Q96T37|RBM15_HUMAN	1		_GSGGS(ph)S(ph)GDELREDDEPVK_	2 Phospho (STY)	sp|Q7Z4V5|HDGR2_HUMAN	0.831		_ILELT(ph)PEPDRPR_	Phospho (STY)	sp|Q14004|CDK13_HUMAN	1		_LAIQGPEDS(ph)PSR_	Phospho (STY)	sp|Q15773|MLF2_HUMAN	0.952
_DGLAPEKT(ph)SPDRDK_	Phospho (STY)	sp|Q7L4I2|RSRC2_HUMAN	0.908		_DLAEFY(ph)MRK_	Phospho (STY)	sp|P48553|TPC10_HUMAN	1		_DKEIS(ph)PSVTK_	Phospho (STY)	sp|Q8N488|RYBP_HUMAN	0.827		_DNDS(ph)ESDYM(ox)FM(ox)APGAGAIPK_	Phospho (STY)	sp|O14654|IRS4_HUMAN	0.988		_DQDLASCDRDRSS(ph)R_	Phospho (STY)	sp|Q9Y383|LC7L2_HUMAN	0.826		_EGEEPTVYS(ph)DEEEPK_	Phospho (STY)	sp|O00264|PGRC1_HUMAN	0.999		_GGSISVQVNSIKFDS(ph)E_	Phospho (STY)	sp|Q14978|NOLC1_HUMAN	1		_GSGTAS(ph)DDEFENLR_	Phospho (STY)	sp|Q7Z6Z7|HUWE1_HUMAN	0.999		_INHTVILDDPFDDPPDLLIPDRS(ph)PEPTR_	Phospho (STY)	sp|Q8WUA2|PPIL4_HUMAN	0.97		_LAPVPS(ph)PEPQKPAPVS(ph)PESVK_	2 Phospho (STY)	sp|Q96JM3|CHAP1_HUMAN	0.988
_DGLAPEKTS(ph)PDRDK_	Phospho (STY)	sp|Q7L4I2|RSRC2_HUMAN	0.895		_DLDEDELLGNLSET(ph)ELK_	Phospho (STY)	sp|Q9NYL9|TMOD3_HUMAN	0.989		_DKEVS(ph)DDEAEEK_	Phospho (STY)	sp|P07900|HS90A_HUMAN	1		_DNDS(ph)ESDYMFM(ox)APGAGAIPK_	Phospho (STY)	sp|O14654|IRS4_HUMAN	0.932		_DQEPKPS(ph)PEPAAVSR_	Phospho (STY)	sp|Q9H7S9|ZN703_HUMAN	1		_EGEEPTVYS(ph)DEEEPKDESAR_	Phospho (STY)	sp|O00264|PGRC1_HUMAN	1		_GGVTGS(ph)PEASISGSK_	Phospho (STY)	sp|Q09666|AHNK_HUMAN	1		_GSSPT(ph)PPCS(ph)PVQPSK_	2 Phospho (STY)	sp|Q9NUL3|STAU2_HUMAN	1		_INHTVILDDPFDDPPDLLIPDRS(ph)PEPTREQLDSGR_	Phospho (STY)	sp|Q8WUA2|PPIL4_HUMAN	0.922		_LDQPVS(ph)APPS(ph)PR_	2 Phospho (STY)	sp|Q16204|CCDC6_HUMAN	1
_DGLNQTTIPVS(ph)PPSTTKPSR_	Phospho (STY)	sp|Q71RC2|LARP4_HUMAN	1		_DLDEEGS(ph)EK_	Oxidation (M),Phospho (STY)	sp|O43719|HTSF1_HUMAN	1		_DKFS(ph)PFPVQDRPESSLVFK_	Phospho (STY)	sp|Q9UQ35|SRRM2_HUMAN	1		_DNDS(ph)ESDYMFMAPGAGAIPK_	Phospho (STY)	sp|O14654|IRS4_HUMAN	0.928		_DQHLNNSSSS(ph)PQR_	Phospho (STY)	sp|Q15154|PCM1_HUMAN	0.996		_EGEEPTVYS(ph)DEEEPKDESARK_	Phospho (STY)	sp|O00264|PGRC1_HUMAN	0.995		_GHLSRPEAQSLS(ph)PYTTSANR_	Phospho (STY)	sp|O94776|MTA2_HUMAN	0.964		_GT(ph)PSQS(ph)PVVGR_	2 Phospho (STY)	sp|P52594|AGFG1_HUMAN	0.992		_INHTVILDDPFDDPPDLLIPDRSPEPT(ph)R_	Phospho (STY)	sp|Q8WUA2|PPIL4_HUMAN	0.81		_LEIS(ph)PDSS(ph)PER_	2 Phospho (STY)	sp|Q99959|PKP2_HUMAN	0.824
_DGLNQTTIPVSPPSTTKPS(ph)R_	Phospho (STY)	sp|Q71RC2|LARP4_HUMAN	0.852		_DLDRPES(ph)QSPKRPPEDFETPSGERPR_	Phospho (STY)	sp|Q8WUA4|TF3C2_HUMAN	0.92		_DKM(ox)EGS(ph)DFESSGGR_	Oxidation (M),Phospho (STY)	sp|Q8WYH8|ING5_HUMAN	1		_DNEEREQSSDLTPSGDVS(ph)PVKPLSR_	Phospho (STY)	sp|Q8WYQ5|DGCR8_HUMAN	1		_DQKKVM(ox)VM(ox)T(ph)S(ph)S(ph)EHTETK_	2 Oxidation (M),3 Phospho (STY)	sp|A4UGR9|XIRP2_HUMAN	0.999		_EGES(ph)PAAGPPPQELVEEEPSAPPTLLEEETEDGSDK_	Phospho (STY)	sp|Q8IZL8|PELP1_HUMAN	1		_GHTDTEGRPPS(ph)PPPTSTPEK_	Phospho (STY)	sp|Q00613|HSF1_HUMAN	0.991		_GTGQS(ph)DDS(ph)DIWDDTALIK_	2 Phospho (STY)	sp|Q16637|SMN_HUMAN	0.971		_IPNYQLS(ph)PTK_	Phospho (STY)	sp|O60934|NBN_HUMAN	0.971		_LEKT(ph)KTR_	Phospho (STY)	sp|P35579|MYH9_HUMAN	1
_DGLPRT(ph)PSRR_	Phospho (STY)	sp|Q9UQ35|SRRM2_HUMAN	1		_DLDRPESQS(ph)PK_	Phospho (STY)	sp|Q8WUA4|TF3C2_HUMAN	1		_DKRPLS(ph)GPDVGTPQPAGLASGAK_	Phospho (STY)	sp|O96013|PAK4_HUMAN	1		_DNEESEQPPVPGT(ph)PTLR_	Phospho (STY)	sp|O15439|MRP4_HUMAN	0.996		_DQQNLPYGVTPAS(ph)PSGHSQGR_	Phospho (STY)	sp|Q7KZI7|MARK2_HUMAN	0.918		_EGETQGVAFEHESPADFQNSQS(ph)PVQDQDK_	Phospho (STY)	sp|P78332|RBM6_HUMAN	0.997		_GHYEVTGS(ph)DDETGK_	Phospho (STY)	sp|Q09666|AHNK_HUMAN	0.999		_GVPAGNS(ph)DTEGGQPGRK_	Phospho (STY)	sp|Q9UKV3|ACINU_HUMAN	0.969		_IQPQPPDEDGDHS(ph)DKEDEQPQVVVLK_	Phospho (STY)	sp|Q96AT1|K1143_HUMAN	1		_LFDEEEDS(ph)S(ph)EK_	2 Phospho (STY)	sp|O43719|HTSF1_HUMAN	1
_DGPGLERS(ph)PGEPGGAAPER_	Phospho (STY)	sp|Q96EB6|SIR1_HUMAN	1		_DLEPGEVPS(ph)DSDEDGEHK_	2 Phospho (STY)	sp|Q96T58|MINT_HUMAN	0.964		_DKS(ph)PVREPIDNLTPEER_	Phospho (STY)	sp|Q14498|RBM39_HUMAN	1		_DNPS(ph)PEPQLDDIKR_	Phospho (STY)	sp|Q96JC9|EAF1_HUMAN	1		_DQQPS(ph)GS(ph)EGEDDDAEAALKK_	2 Phospho (STY)	sp|Q9NXG2|THUM1_HUMAN	1		_EGFT(ph)FEYRYLEDRDLQ_	Phospho (STY)	sp|O75175|CNOT3_HUMAN	0.881		_GIS(ph)PIVFDR_	Phospho (STY)	sp|Q96MU7|YTDC1_HUMAN	1		_HAS(ph)S(ph)S(ph)PESPKPAPAPGSHR_	3 Phospho (STY)	sp|Q9UQ35|SRRM2_HUMAN	0.911		_IQQFDDGGS(ph)DEEDIWEEK_	Phospho (STY)	sp|Q5H9R7|PP6R3_HUMAN	1		_LFDEEEDS(ph)SEK_	Phospho (STY)	sp|O43719|HTSF1_HUMAN	0.95
_DGQDAIAQS(ph)PEK_	Phospho (STY)	sp|Q9NWH9|SLTM_HUMAN	1		_DLESCS(ph)DDDNQGSK_	Phospho (STY)	sp|Q5T3I0|GPTC4_HUMAN	1		_DKVEENS(ph)VRSPR_	Phospho (STY)	sp|Q92576|PHF3_HUMAN	0.941		_DNQESS(ph)DAELS(ph)SSEYIK_	Phospho (STY)	sp|Q96JM3|CHAP1_HUMAN	0.887		_DQS(ph)PFSK_	Phospho (STY)	sp|Q13427|PPIG_HUMAN	0.996		_EGGSKS(ph)DSEDITR_	Phospho (STY)	sp|O00470|MEIS1_HUMAN	0.996		_GKAS(ph)PFEEDQNR_	Phospho (STY)	sp|Q8TB72|PUM2_HUMAN	1		_HAS(ph)SSPES(ph)PKPAPAPGSHR_	2 Phospho (STY)	sp|Q9UQ35|SRRM2_HUMAN	0.992		_IRAEEEDLAAVPFLAS(ph)DNEEEEDEK_	Phospho (STY)	sp|O95714|HERC2_HUMAN	1		_LFDEEEDSS(ph)EK_	Phospho (STY)	sp|O43719|HTSF1_HUMAN	0.986
_DGQVINET(ph)SQHHDDLE_	Phospho (STY)	sp|P08670|VIME_HUMAN	0.822		_DLFDLNS(ph)SEEDDTEGFSER_	Phospho (STY)	sp|Q9Y3T9|NOC2L_HUMAN	0.894		_DKVEENSVRS(ph)PR_	Phospho (STY)	sp|Q92576|PHF3_HUMAN	0.962		_DNQESS(ph)DAELSSSEYIK_	Phospho (STY)	sp|Q96JM3|CHAP1_HUMAN	0.984		_DQS(ph)PPPS(ph)PPPSYHPPPPPTK_	2 Phospho (STY)	sp|Q9P206|K1522_HUMAN	0.939		_EGHSLEMENENLVENGADS(ph)DEDDNSFLK_	Phospho (STY)	sp|Q9UHB6|LIMA1_HUMAN	0.978		_GKDSLS(ph)DDGVDLK_	Phospho (STY)	sp|P07948|LYN_HUMAN	0.998		_HASS(ph)S(ph)PES(ph)PKPAPAPGSHR_	3 Phospho (STY)	sp|Q9UQ35|SRRM2_HUMAN	0.86		_ISTASQVSQGTGS(ph)PVPK_	Phospho (STY)	sp|Q9ULM3|YETS2_HUMAN	0.936		_LFEDDDS(ph)NEK_	Phospho (STY)	sp|O43719|HTSF1_HUMAN	1
_DGSS(ph)PPLLEK_	Phospho (STY)	sp|Q6W2J9|BCOR_HUMAN	0.994		_DLFDY(ph)SPPLHK_	Phospho (STY)	sp|Q9NYF8|BCLF1_HUMAN	0.867		_DKY(ph)EAELSELEQS(ph)ERK_	2 Phospho (STY)	sp|Q9UPN4|CP131_HUMAN	0.993		_DNS(ph)PLREK_	Oxidation (M),Phospho (STY)	sp|Q5VUA4|ZN318_HUMAN	1		_DRDAS(ph)PSKEER_	Phospho (STY)	sp|Q9BUQ8|DDX23_HUMAN	0.978		_EGKPEIEGKPES(ph)EGEPGSETR_	Phospho (STY)	sp|Q96EI5|TCAL4_HUMAN	0.926		_GKEELAEAEIIKDSPDS(ph)PEPPNK_	Phospho (STY)	sp|Q9NVM9|ASUN_HUMAN	0.971		_HCAPS(ph)PDRS(ph)PELSSSR_	2 Phospho (STY)	sp|Q96T37|RBM15_HUMAN	0.998		_IVEPEVVGES(ph)DS(ph)EVEGDAWR_	2 Phospho (STY)	sp|P55081|MFAP1_HUMAN	1		_LFEES(ph)DDKEDEDADGK_	Phospho (STY)	sp|O43719|HTSF1_HUMAN	1
_DGTAPPPQSPGSPGTGQDEEWS(ph)DEESPRK_	Phospho (STY)	sp|Q9UKS6|PACN3_HUMAN	0.995		_DLFDYS(ph)PPLHK_	Phospho (STY)	sp|Q9NYF8|BCLF1_HUMAN	1		_DLDEEGS(ph)EK_	Phospho (STY)	sp|O43719|HTSF1_HUMAN	1		_DNSNS(ph)DS(ph)EGEDRRPAGPPREPVR_	2 Phospho (STY)	sp|Q8NCF5|NF2IP_HUMAN	0.974		_DREPHGYS(ph)PER_	Phospho (STY)	sp|Q9HCM7|FBSL_HUMAN	0.859		_EGLSGDALSSPSAPEPVVGT(ph)PDDKLDADYIK_	Phospho (STY)	sp|Q92503|S14L1_HUMAN	1		_GKGS(ph)PRPQAPK_	Phospho (STY)	sp|Q14978|NOLC1_HUMAN	1		_HDS(ph)PDPS(ph)PPR_	2 Phospho (STY)	sp|Q9BRD0|BUD13_HUMAN	1		_IVEPEVVGES(ph)DSEVEGDAWR_	Phospho (STY)	sp|P55081|MFAP1_HUMAN	0.978		_LFEES(ph)DDKEDEDADGKEVEDADEK_	Phospho (STY)	sp|O43719|HTSF1_HUMAN	1
_DGTS(ph)PEEEIEIER_	Phospho (STY)	sp|Q9H501|ESF1_HUMAN	0.946		_DLFNGLDS(ph)EEEK_	Phospho (STY)	sp|Q96S90|LYSM1_HUMAN	1		_DLDRPESQS(ph)PK_	Phospho (STY)	sp|Q8WUA4|TF3C2_HUMAN	1		_DNTFFRES(ph)PVGR_	Phospho (STY)	sp|Q8NEY8|PPHLN_HUMAN	1		_DRES(ph)RS(ph)PFLKPDER_	2 Phospho (STY)	sp|Q9H7N4|SFR19_HUMAN	1		_EGNTTEDDFPSS(ph)PGNGNK_	Phospho (STY)	sp|Q15007|FL2D_HUMAN	0.999		_GKIEVLDS(ph)PASK_	Phospho (STY)	sp|Q8N5I9|CL045_HUMAN	0.999		_HDS(ph)PDPS(ph)PPRR_	2 Phospho (STY)	sp|Q9BRD0|BUD13_HUMAN	1		_IVQM(ox)LLPVT(ph)S(ph)RTR_	Oxidation (M),2 Phospho (STY)	sp|Q96Q27|ASB2_HUMAN	1		_LGAGEGGEAS(ph)VS(ph)PEK_	2 Phospho (STY)	sp|Q13428|TCOF_HUMAN	1
_DGVLTLANNVT(ph)PAK_	Phospho (STY)	sp|P27816|MAP4_HUMAN	1		_DLFNGLDS(ph)EEEKDGEEK_	Phospho (STY)	sp|Q96S90|LYSM1_HUMAN	1		_DLESCS(ph)DDDNQGSK_	Phospho (STY)	sp|Q5T3I0|GPTC4_HUMAN	1		_DNTRPGANS(ph)PEM(ox)WSEAIK_	Phospho (STY)	sp|Q92499|DDX1_HUMAN	0.996		_DRGLDS(ph)GAET(ph)EEEKDTWEEK_	2 Phospho (STY)	sp|P78559|MAP1A_HUMAN	1		_EGPEPPEEVPPPT(ph)TPPVPK_	Phospho (STY)	sp|P48634|PRC2A_HUMAN	0.898		_GKLS(ph)AEENPDDSEVPSSSGINSTK_	Phospho (STY)	sp|Q9Y5Q9|TF3C3_HUMAN	1		_HDT(ph)PDPS(ph)PLR_	2 Phospho (STY)	sp|Q9BRD0|BUD13_HUMAN	1		_IYHLPDAES(ph)DEDEDFK_	Phospho (STY)	sp|Q15019|SEPT2_HUMAN	1		_LGAGEGGEASVS(ph)PEK_	Phospho (STY)	sp|Q13428|TCOF_HUMAN	1
_DGYGGS(ph)RDSYSSSR_	Oxidation (M),Phospho (STY)	sp|P38159|RBMX_HUMAN	0.946		_DLFSLDSEDPSPAS(ph)PPLR_	Phospho (STY)	sp|Q9BTK6|PAGR1_HUMAN	1		_DLFDYS(ph)PPLHK_	Phospho (STY)	sp|Q9NYF8|BCLF1_HUMAN	1		_DPAQPMS(ph)PGEATQSGARPADR_	Phospho (STY)	sp|Q9BQG0|MBB1A_HUMAN	0.993		_DRGLDS(ph)GAETEEEK_	Phospho (STY)	sp|P78559|MAP1A_HUMAN	1		_EGPEPPEEVPPPTT(ph)PPVPK_	Phospho (STY)	sp|P48634|PRC2A_HUMAN	0.943		_GKS(ph)PVPKS(ph)PVEEK_	2 Phospho (STY)	sp|P07197|NFM_HUMAN	1		_HEVSASTQS(ph)T(ph)PASSR_	2 Phospho (STY)	sp|Q01082|SPTB2_HUMAN	0.998		_IYHLPDAES(ph)DEDEDFKEQTR_	Phospho (STY)	sp|Q15019|SEPT2_HUMAN	1		_LGAGGGS(ph)PEKS(ph)PSAQELK_	2 Phospho (STY)	sp|Q9UNE7|CHIP_HUMAN	0.999
_DGYGGSRDS(ph)YSSSR_	Phospho (STY)	sp|P38159|RBMX_HUMAN	0.911		_DLGSTEDGDGT(ph)DDFLTDKEDEK_	Phospho (STY)	sp|Q15527|SURF2_HUMAN	1		_DLFSLDSEDPSPAS(ph)PPLR_	Phospho (STY)	sp|Q9BTK6|PAGR1_HUMAN	1		_DPSSGQEVAT(ph)PPVPQLQVCEPK_	Phospho (STY)	sp|Q9UKV3|ACINU_HUMAN	0.995		_DRHDT(ph)PDPS(ph)PR_	2 Phospho (STY)	sp|Q9BRD0|BUD13_HUMAN	1		_EGPGEEHFEDMAS(ph)DEDMKPK_	Phospho (STY)	sp|Q99856|ARI3A_HUMAN	1		_GKS(ph)PVSKS(ph)PVEEK_	2 Phospho (STY)	sp|P07197|NFM_HUMAN	0.989		_HFRHDT(ph)PDSS(ph)PR_	2 Phospho (STY)	sp|Q9BRD0|BUD13_HUMAN	0.874		_IYPEEMIQT(ph)GIS(ph)PIDVMNS(ph)IARGQK_	3 Phospho (STY)	sp|P15313|VATB1_HUMAN	0.997		_LGASNS(ph)PGQPNS(ph)VK_	2 Phospho (STY)	sp|P49756|RBM25_HUMAN	0.997
_DHANYEEDENGDIT(ph)PIK_	Phospho (STY)	sp|Q99547|MPH6_HUMAN	1		_DLIDNS(ph)FNR_	Phospho (STY)	sp|Q8IY81|SPB1_HUMAN	1		_DLGSTEDGDGT(ph)DDFLTDKEDEK_	Phospho (STY)	sp|Q15527|SURF2_HUMAN	1		_DQAHT(ph)VT(ph)PDK_	Phospho (STY)	sp|Q6AI39|GSC1L_HUMAN	1		_DRICS(ph)DEEEDEEK_	Phospho (STY)	sp|Q9NPG3|UBN1_HUMAN	1		_EGRGES(ph)ENAGTNQETR_	Phospho (STY)	sp|Q08170|SRSF4_HUMAN	1		_GKT(ph)PEEIRK_	Phospho (STY)	sp|P63208|SKP1_HUMAN	1		_HGGS(ph)PQPLATT(ph)PLSQEPVNPPSEAS(ph)PTR_	3 Phospho (STY)	sp|Q9UQ35|SRRM2_HUMAN	0.834		_KAAS(ph)PS(ph)PQSVR_	2 Phospho (STY)	sp|Q8IYB3|SRRM1_HUMAN	0.999		_LGASNS(ph)PGQPNSVK_	Phospho (STY)	sp|P49756|RBM25_HUMAN	1
_DHFGLEGDEESTM(ox)LEDSVS(ph)PKK_	Phospho (STY)	sp|Q9Y490|TLN1_HUMAN	0.964		_DLISLDSS(ph)PAK_	Phospho (STY)	sp|Q9UN79|SOX13_HUMAN	0.993		_DLLHPS(ph)PEEEK_	Phospho (STY)	sp|P42677|RS27_HUMAN	1		_DQDLASCDRDRS(ph)SR_	Phospho (STY)	sp|Q9Y383|LC7L2_HUMAN	0.808		_DRPHASGT(ph)DGDES(ph)EEDPPEHKPSK_	2 Phospho (STY)	sp|Q96RS0|TGS1_HUMAN	0.942		_EGRPSGEAFVELES(ph)EDEVK_	Phospho (STY)	sp|P31943|HNRH1_HUMAN	1		_GLAAEDS(ph)GGDSK_	Phospho (STY)	sp|P41227|NAA10_HUMAN	1		_HGGS(ph)PQPLATTPLS(ph)QEPVNPPSEAS(ph)PTR_	3 Phospho (STY)	sp|Q9UQ35|SRRM2_HUMAN	0.899		_KADRDQSPFS(ph)K_	Phospho (STY)	sp|Q13427|PPIG_HUMAN	0.995		_LHQLS(ph)GS(ph)DQLESTAHSR_	2 Phospho (STY)	sp|O60271|JIP4_HUMAN	0.999
_DHS(ph)DS(ph)DDQM(ox)LVAK_	Oxidation (M),Phospho (STY)	sp|Q9NW75|GPTC2_HUMAN	1		_DLLHPS(ph)PEEEK_	Phospho (STY)	sp|P42677|RS27_HUMAN	1		_DLLM(ox)NDRS(ph)T(ph)GEK_	Oxidation (M),2 Phospho (STY)	sp|Q29RF7|PDS5A_HUMAN	1		_DQDLASCDRDRSS(ph)R_	Phospho (STY)	sp|Q9Y383|LC7L2_HUMAN	0.949		_DRPHASGTDGDES(ph)EEDPPEHKPSK_	Phospho (STY)	sp|Q96RS0|TGS1_HUMAN	0.962		_EGS(ph)PAPLEPEPGAAQPK_	Phospho (STY)	sp|Q01167|FOXK2_HUMAN	1		_GLAEVQQDGEAEEGATS(ph)DGEK_	Phospho (STY)	sp|Q02952|AKA12_HUMAN	0.98		_HGGS(ph)PQPLATTPLSQEPVNPPS(ph)EAS(ph)PTR_	3 Phospho (STY)	sp|Q9UQ35|SRRM2_HUMAN	0.99		_KAEGEPQEES(ph)PLK_	Phospho (STY)	sp|Q9NYF8|BCLF1_HUMAN	1		_LKLS(ph)PS(ph)PSSR_	2 Phospho (STY)	sp|P20700|LMNB1_HUMAN	0.947
_DHS(ph)PT(ph)PSVFNSDEERYR_	2 Phospho (STY)	sp|Q6UN15|FIP1_HUMAN	0.932		_DLLPS(ph)PAGPVPSK_	Phospho (STY)	sp|Q9UHB7|AFF4_HUMAN	1		_DLLPS(ph)PAGPVPSK_	Phospho (STY)	sp|Q9UHB7|AFF4_HUMAN	1		_DQEPKPS(ph)PEPAAVSR_	Phospho (STY)	sp|Q9H7S9|ZN703_HUMAN	1		_DRRPLLTAPDHCS(ph)DDA_	Phospho (STY)	sp|Q9GZR2|REXO4_HUMAN	1		_EGS(ph)PIPHDPEFGSK_	Phospho (STY)	sp|P85037|FOXK1_HUMAN	1		_GLLSNHTGS(ph)PR_	Phospho (STY)	sp|Q13111|CAF1A_HUMAN	0.999		_HGGS(ph)PQPLATTPLSQEPVNPPSEAS(ph)PTR_	2 Phospho (STY)	sp|Q9UQ35|SRRM2_HUMAN	0.956		_KAEPSEVDM(ox)NS(ph)PK_	Oxidation (M),Phospho (STY)	sp|Q9NR30|DDX21_HUMAN	1		_LKLS(ph)PSPSS(ph)R_	2 Phospho (STY)	sp|P20700|LMNB1_HUMAN	0.805
_DHS(ph)PTPS(ph)VFNSDEER_	Phospho (STY)	sp|Q6UN15|FIP1_HUMAN	0.979		_DLLSDLQDIS(ph)DSER_	Phospho (STY)	sp|P21127|CD11B_HUMAN	0.984		_DLLPSGSRDEPPPASQSTSQDCSQALKQS(ph)P_	Phospho (STY)	sp|Q5JRA6|MIA3_HUMAN	1		_DQKKVM(ox)VM(ox)T(ph)S(ph)S(ph)EHTETK_	2 Phospho (STY)	sp|A4UGR9|XIRP2_HUMAN	0.998		_DRS(ph)PHRS(ph)SPSDTRPK_	2 Phospho (STY)	sp|Q8IWS0|PHF6_HUMAN	0.872		_EGSQGELT(ph)PANSQSR_	Phospho (STY)	sp|Q13098|CSN1_HUMAN	1		_GLLYDS(ph)DEEDEERPAR_	Phospho (STY)	sp|P49736|MCM2_HUMAN	1		_HGGSPQPLATTPLSQEPVNPPSEAS(ph)PTR_	Phospho (STY)	sp|Q9UQ35|SRRM2_HUMAN	0.827		_KAEPSEVDMNS(ph)PK_	Phospho (STY)	sp|Q9NR30|DDX21_HUMAN	1		_LLEDS(ph)EES(ph)SEETVSR_	2 Phospho (STY)	sp|O60231|DHX16_HUMAN	0.965
_DHS(ph)PTPS(ph)VFNSDEERYR_	Phospho (STY)	sp|Q6UN15|FIP1_HUMAN	0.913		_DLLVSSGSNNSLPCGS(ph)PKK_	Phospho (STY)	sp|Q5THK1|PR14L_HUMAN	0.983		_DLLSDLQDIS(ph)DSER_	Phospho (STY)	sp|P21127|CD11B_HUMAN	0.97		_DQMRANVINEIMST(ph)ER_	Phospho (STY)	sp|O43307|ARHG9_HUMAN	0.86		_DRS(ph)PHRSS(ph)PSDTRPK_	2 Phospho (STY)	sp|Q8IWS0|PHF6_HUMAN	0.893		_EGSTQQLQTTS(ph)PK_	Phospho (STY)	sp|Q5T8P6|RBM26_HUMAN	0.992		_GLLYDS(ph)DEEDEERPARK_	Phospho (STY)	sp|P49736|MCM2_HUMAN	1		_HGLQLGAQS(ph)PGR_	Phospho (STY)	sp|Q8N1G0|ZN687_HUMAN	1		_KAPEPEEEIEEVEES(ph)EDEGEDPALDSLSQAIAFQQAK_	Phospho (STY)	sp|Q8TBF4|ZCRB1_HUMAN	0.999		_LLGDS(ph)DS(ph)EEEQK_	2 Phospho (STY)	sp|Q9BW71|HIRP3_HUMAN	1
_DHS(ph)PTPSVFNS(ph)DEERYR_	2 Phospho (STY)	sp|Q6UN15|FIP1_HUMAN	0.949		_DLNES(ph)PVK_	Phospho (STY)	sp|Q96RL1|UIMC1_HUMAN	1		_DLPAQRGEES(ph)S(ph)EEEEK_	2 Phospho (STY)	sp|Q9BW71|HIRP3_HUMAN	1		_DQNQHT(ph)M(ox)NKQY(ph)EK_	Phospho (STY)	sp|Q5T9S5|CCD18_HUMAN	1		_DRS(ph)PIRGS(ph)PR_	2 Phospho (STY)	sp|Q9HCD5|NCOA5_HUMAN	1		_EGVQGPLNVS(ph)LSEEGK_	Phospho (STY)	sp|P12270|TPR_HUMAN	0.966		_GM(ox)KDDKEEEEDGT(ph)GSPQLNNR_	Oxidation (M),Phospho (STY)	sp|P49407|ARRB1_HUMAN	0.897		_HGS(ph)FHEDEDPIGS(ph)PR_	2 Phospho (STY)	sp|Q96T58|MINT_HUMAN	1		_KAS(ph)PEPEGEAAGK_	Phospho (STY)	sp|Q8IU81|I2BP1_HUMAN	1		_LLKPGEEPSEYT(ph)DEEDTK_	Phospho (STY)	sp|O15173|PGRC2_HUMAN	0.808
_DHS(ph)PTPSVFNSDEER_	Oxidation (M),Phospho (STY)	sp|Q6UN15|FIP1_HUMAN	1		_DLPAQRGEES(ph)S(ph)EEEEK_	Oxidation (M),Phospho (STY)	sp|Q9BW71|HIRP3_HUMAN	1		_DLPS(ph)PDSR_	Phospho (STY)	sp|Q9UGU0|TCF20_HUMAN	0.993		_DQQNLPYGVTPAS(ph)PSGHSQGR_	Phospho (STY)	sp|Q7KZI7|MARK2_HUMAN	0.971		_DRS(ph)PPKS(ph)PEK_	2 Phospho (STY)	sp|Q9UQ35|SRRM2_HUMAN	1		_EHEEGRDS(ph)EEGPR_	Phospho (STY)	sp|Q7Z4V5|HDGR2_HUMAN	1		_GM(ox)KDDKEEEEDGTGS(ph)PQLNNR_	Oxidation (M),Phospho (STY)	sp|P49407|ARRB1_HUMAN	0.934		_HGSFHEDEDPIGS(ph)PR_	Phospho (STY)	sp|Q96T58|MINT_HUMAN	1		_KDAVALCS(ph)M(ox)AK_	Oxidation (M),Phospho (STY)	sp|Q9UKU7|ACAD8_HUMAN	1		_LLNS(ph)ASDPSLK_	Phospho (STY)	sp|Q9BQI7|PSD2_HUMAN	0.994
_DHS(ph)PTPSVFNSDEERYR_	4 Phospho (STY)	sp|Q6UN15|FIP1_HUMAN	0.997		_DLPDGHAAS(ph)PR_	2 Phospho (STY)	sp|Q9P1Y5|CAMP3_HUMAN	1		_DLQEQDADAGS(ph)ER_	Phospho (STY)	sp|Q6P158|DHX57_HUMAN	1		_DQQPS(ph)GS(ph)EGEDDDAEAALKK_	2 Phospho (STY)	sp|Q9NXG2|THUM1_HUMAN	1		_DRSPHRS(ph)SPSDT(ph)RPK_	2 Phospho (STY)	sp|Q8IWS0|PHF6_HUMAN	0.857		_EHSLQVS(ph)PSLEK_	Phospho (STY)	sp|O95235|KI20A_HUMAN	0.927		_GNAEGS(ph)S(ph)DEEGKLVIDEPAK_	2 Phospho (STY)	sp|P51858|HDGF_HUMAN	1		_HGSSDIS(ph)S(ph)PR_	2 Phospho (STY)	sp|Q9BRD0|BUD13_HUMAN	0.945		_KDDS(ph)DDDGGGWITPSNIK_	Phospho (STY)	sp|Q9ULX3|NOB1_HUMAN	1		_LM(ox)LSTSEYS(ph)QS(ph)PK_	Oxidation (M),2 Phospho (STY)	sp|Q12888|TP53B_HUMAN	0.956
_DHSPT(ph)PSVFNSDEER_	Phospho (STY)	sp|Q6UN15|FIP1_HUMAN	0.996		_DLPS(ph)PDSR_	2 Phospho (STY)	sp|Q9UGU0|TCF20_HUMAN	0.994		_DLQS(ph)PDFTTGFHSDK_	Phospho (STY)	sp|Q9P2D0|IBTK_HUMAN	0.999		_DQS(ph)PFSK_	3 Phospho (STY)	sp|Q13427|PPIG_HUMAN	0.996		_DRT(ph)PPLLYR_	Phospho (STY)	sp|Q96T37|RBM15_HUMAN	1		_EIAIVHS(ph)DAEK_	Phospho (STY)	sp|Q9H307|PININ_HUMAN	1		_GNDPLTSS(ph)PGR_	Phospho (STY)	sp|P49736|MCM2_HUMAN	0.999		_HGT(ph)PDPS(ph)PR_	2 Phospho (STY)	sp|Q9BRD0|BUD13_HUMAN	1		_KDGSS(ph)PPLLEK_	Phospho (STY)	sp|Q6W2J9|BCOR_HUMAN	0.948		_LPDS(ph)DDDEDEETAIQR_	Phospho (STY)	sp|Q96K21|ANCHR_HUMAN	1
_DHYQDPVPGIT(ph)PSSSSR_	Phospho (STY)	sp|Q7KZ85|SPT6H_HUMAN	0.998		_DLPSPDS(ph)R_	Phospho (STY)	sp|Q9UGU0|TCF20_HUMAN	0.851		_DLS(ph)LEEIQK_	Phospho (STY)	sp|P16949|STMN1_HUMAN	1		_DRES(ph)RS(ph)PFLKPDER_	2 Phospho (STY)	sp|Q9H7N4|SFR19_HUMAN	1		_DS(ph)ALQDTDDS(ph)DDDPVLIPGAR_	2 Phospho (STY)	sp|Q58WW2|DCAF6_HUMAN	0.843		_EIAIVHS(ph)DAEKEQEEEEQK_	Phospho (STY)	sp|Q9H307|PININ_HUMAN	1		_GNIETTSEDGQVFS(ph)PKK_	Phospho (STY)	sp|Q5T200|ZC3HD_HUMAN	1		_HIKEEPLS(ph)EEEPCTSTAIAS(ph)PEK_	2 Phospho (STY)	sp|Q9Y2X3|NOP58_HUMAN	1		_KDS(ph)EEEVSLLGSQDIEEGNHQVEDGCR_	Phospho (STY)	sp|Q9Y487|VPP2_HUMAN	1		_LQEEQDGGS(ph)S(ph)DEDRAGPAPPGASDGVDIQDVK_	2 Phospho (STY)	sp|Q14147|DHX34_HUMAN	1
_DIDHETVVEEQIIGENS(ph)PPDYSEYM(ox)TGK_	Phospho (STY)	sp|P25490|TYY1_HUMAN	0.996		_DLQEQDADAGS(ph)ER_	2 Phospho (STY)	sp|Q6P158|DHX57_HUMAN	1		_DLS(ph)PEPAPDEGPR_	Phospho (STY)	sp|Q8TBE0|BAHD1_HUMAN	1		_DRHDT(ph)PDPS(ph)PR_	Phospho (STY)	sp|Q9BRD0|BUD13_HUMAN	1		_DS(ph)QIS(ph)KPTVENDLK_	2 Phospho (STY)	sp|Q9C0D2|K1731_HUMAN	0.987		_EIAIVHS(ph)DAEKEQEEEEQKQEM(ox)EVK_	Oxidation (M),Phospho (STY)	sp|Q9H307|PININ_HUMAN	1		_GNLLHFPSS(ph)QGEEEK_	Phospho (STY)	sp|Q12888|TP53B_HUMAN	0.867		_HIKEEPLS(ph)EEEPCTSTAIAS(ph)PEKK_	2 Phospho (STY)	sp|Q9Y2X3|NOP58_HUMAN	0.97		_KEDKPEGQS(ph)PVK_	Phospho (STY)	sp|Q9C0C9|UBE2O_HUMAN	1		_LQQGAGLES(ph)PQGQPEPGAAS(ph)PQR_	2 Phospho (STY)	sp|Q9H6F5|CCD86_HUMAN	1
_DIDISS(ph)PEFK_	3 Phospho (STY)	sp|Q09666|AHNK_HUMAN	0.978		_DLQS(ph)PDFTTGFHSDK_	Phospho (STY)	sp|Q9P2D0|IBTK_HUMAN	1		_DLS(ph)TSPKPS(ph)PIPS(ph)PVLGR_	3 Phospho (STY)	sp|Q8NDI1|EHBP1_HUMAN	0.932		_DRICS(ph)DEEEDEEK_	Phospho (STY)	sp|Q9NPG3|UBN1_HUMAN	1		_DSAIPVES(ph)DT(ph)DDEGAPR_	2 Phospho (STY)	sp|Q96D46|NMD3_HUMAN	1		_EIAIVHS(ph)DAEKEQEEEEQKQEMEVK_	Phospho (STY)	sp|Q9H307|PININ_HUMAN	1		_GNS(ph)PPSSGEACREEK_	Phospho (STY)	sp|P41227|NAA10_HUMAN	1		_HIKEEPLS(ph)EEEPCTSTAIASPEK_	Phospho (STY)	sp|Q9Y2X3|NOP58_HUMAN	1		_KEEENADS(ph)DDEGELQDLLSQDWR_	Phospho (STY)	sp|Q96NB3|ZN830_HUMAN	1		_LQQGAGLESPQGQPEPGAAS(ph)PQR_	Phospho (STY)	sp|Q9H6F5|CCD86_HUMAN	1
_DIEIS(ph)T(ph)EEEK_	Phospho (STY)	sp|Q4G0J3|LARP7_HUMAN	1		_DLQS(ph)PDFTTGFHSDKIEAK_	2 Phospho (STY)	sp|Q9P2D0|IBTK_HUMAN	0.992		_DLSSS(ph)PPGPYGQEM(ox)YAFR_	Oxidation (M),Phospho (STY)	sp|O43741|AAKB2_HUMAN	0.921		_DRRPLLTAPDHCS(ph)DDA_	Phospho (STY)	sp|Q9GZR2|REXO4_HUMAN	0.998		_DSAIPVES(ph)DTDDEGAPR_	Phospho (STY)	sp|Q96D46|NMD3_HUMAN	1		_EIPSATQS(ph)PISK_	Phospho (STY)	sp|Q9BQG0|MBB1A_HUMAN	0.998		_GNS(ph)RPGT(ph)PSAEGGSTSSTLR_	2 Phospho (STY)	sp|P35269|T2FA_HUMAN	0.977		_HKS(ph)ES(ph)PCESPYPNEK_	2 Phospho (STY)	sp|Q8NI27|THOC2_HUMAN	0.982		_KEESEES(ph)DDDMGFGLFD_	Phospho (STY)	sp|P05387|RLA2_HUMAN	0.994		_LQT(ph)PNT(ph)FPK_	2 Phospho (STY)	sp|Q14978|NOLC1_HUMAN	1
_DIEIS(ph)T(ph)EEEKDTGDLK_	2 Phospho (STY)	sp|Q4G0J3|LARP7_HUMAN	1		_DLS(ph)LEEIQK_	Phospho (STY)	sp|P16949|STMN1_HUMAN	1		_DLT(ph)T(ph)VAVDVVLENGS(ph)QY(ph)R_	4 Phospho (STY)	sp|Q9UHC1|MLH3_HUMAN	1		_DRS(ph)PHRS(ph)SPSDTRPK_	Phospho (STY)	sp|Q8IWS0|PHF6_HUMAN	0.819		_DSAIPVESDT(ph)DDEGAPR_	Phospho (STY)	sp|Q96D46|NMD3_HUMAN	0.997		_EIS(ph)CRGER_	Phospho (STY)	sp|O94813|SLIT2_HUMAN	1		_GNS(ph)RPGTPS(ph)AEGGSTSSTLR_	2 Phospho (STY)	sp|P35269|T2FA_HUMAN	0.893		_HM(ox)DPPPAPVQDRS(ph)PS(ph)PR_	Oxidation (M),2 Phospho (STY)	sp|P46821|MAP1B_HUMAN	1		_KEIEM(ox)HS(ph)INDK_	Oxidation (M),Phospho (STY)	sp|Q06136|KDSR_HUMAN	1		_LRS(ph)PRGS(ph)PDGSLQTGKPSAPK_	2 Phospho (STY)	sp|Q8IZL8|PELP1_HUMAN	0.999
_DIEVLS(ph)EDT(ph)DYEEDEVTK_	2 Phospho (STY)	sp|Q4LE39|ARI4B_HUMAN	0.995		_DLS(ph)PEPAPDEGPR_	2 Phospho (STY)	sp|Q8TBE0|BAHD1_HUMAN	1		_DLVLPTQALPAS(ph)PALK_	Phospho (STY)	sp|Q15554|TERF2_HUMAN	1		_DRS(ph)PSRLDTFLK_	Phospho (STY)	sp|Q66GS9|CP135_HUMAN	0.888		_DSALAEAPEGLS(ph)PAPPAR_	Phospho (STY)	sp|Q9H9J4|UBP42_HUMAN	1		_EIS(ph)DDEAEEEK_	Phospho (STY)	sp|P08238|HS90B_HUMAN	1		_GPAS(ph)DSET(ph)EDASR_	2 Phospho (STY)	sp|Q96ST2|IWS1_HUMAN	0.884		_HPKGEEGS(ph)DDDETENGPKPK_	Phospho (STY)	sp|Q6PD62|CTR9_HUMAN	1		_KEKT(ph)PELPEPSVK_	Phospho (STY)	sp|Q8IYB3|SRRM1_HUMAN	1		_LS(ph)EGS(ph)QPAEEEEDQETPSR_	2 Phospho (STY)	sp|Q9UKV3|ACINU_HUMAN	1
_DIEVLS(ph)EDT(ph)DYEEDEVTKK_	2 Phospho (STY)	sp|Q4LE39|ARI4B_HUMAN	0.952		_DLS(ph)PTLIDNSAAK_	2 Phospho (STY)	sp|Q9P2B4|CT2NL_HUMAN	0.99		_DLVQPDKPAS(ph)PK_	Phospho (STY)	sp|Q6PJT7|ZC3HE_HUMAN	1		_DRSS(ph)PPPGYIPDELHQVAR_	Phospho (STY)	sp|Q9Y2U5|M3K2_HUMAN	0.946		_DSALQDT(ph)DDS(ph)DDDPVLIPGAR_	2 Phospho (STY)	sp|Q58WW2|DCAF6_HUMAN	0.961		_EIS(ph)DDEAEEEKGEK_	Phospho (STY)	sp|P08238|HS90B_HUMAN	1		_GPGAPGLAHLQESQAGS(ph)DTDVEEGK_	Phospho (STY)	sp|Q14676|MDC1_HUMAN	0.872		_HPNYS(ph)PPGS(ph)PIEK_	2 Phospho (STY)	sp|Q9UHF7|TRPS1_HUMAN	0.99		_KES(ph)KEEETSIDVAGKPNEVTK_	Phospho (STY)	sp|P53985|MOT1_HUMAN	1		_LSS(ph)EDEEEDEAEDDQSEASGKK_	Phospho (STY)	sp|Q8NEJ9|NGDN_HUMAN	0.816
_DIFYYEDDS(ph)EGEDIEK_	Phospho (STY)	sp|Q15361|TTF1_HUMAN	1		_DLVLPTQALPAS(ph)PALK_	Phospho (STY)	sp|Q15554|TERF2_HUMAN	1		_DM(ox)DEPS(ph)PVPNVEEVTLPK_	Oxidation (M),Phospho (STY)	sp|Q8TAQ2|SMRC2_HUMAN	1		_DRT(ph)PPHLLYSDR_	Phospho (STY)	sp|Q8NDT2|RB15B_HUMAN	1		_DSDQVAQS(ph)DGEES(ph)PAAEEQLLGEHIK_	2 Phospho (STY)	sp|O94979|SC31A_HUMAN	1		_EIS(ph)DDEAEEEKGEKEEEDK_	Phospho (STY)	sp|P08238|HS90B_HUMAN	1		_GPGAPGLAHLQESQAGSDT(ph)DVEEGK_	Phospho (STY)	sp|Q14676|MDC1_HUMAN	0.859		_HQAS(ph)DS(ph)ENEELPKPR_	2 Phospho (STY)	sp|Q96ST2|IWS1_HUMAN	1		_KESKEEET(ph)S(ph)IDVAGKPNEVTK_	2 Phospho (STY)	sp|P53985|MOT1_HUMAN	0.972		_LSVPT(ph)S(ph)DEEDEVPAPKPR_	2 Phospho (STY)	sp|Q8NE71|ABCF1_HUMAN	1
_DIIRQPS(ph)EEEIIK_	Oxidation (M),Phospho (STY)	sp|Q15121|PEA15_HUMAN	1		_DLVQPDKPAS(ph)PK_	Oxidation (M),Phospho (STY)	sp|Q6PJT7|ZC3HE_HUMAN	1		_DM(ox)ES(ph)PTKLDVTLAK_	Oxidation (M),Phospho (STY)	sp|P27816|MAP4_HUMAN	1		_DRT(ph)PPHLLYSDRDR_	2 Phospho (STY)	sp|Q8NDT2|RB15B_HUMAN	1		_DSDQVAQS(ph)DGEES(ph)PAAEEQLLGEHIKEEK_	2 Phospho (STY)	sp|O94979|SC31A_HUMAN	0.996		_EITSHEEGGGDVS(ph)PR_	Phospho (STY)	sp|Q8N655|CJ012_HUMAN	1		_GPGQPS(ph)SPQRLDR_	Phospho (STY)	sp|O95400|CD2B2_HUMAN	0.933		_HQAS(ph)DS(ph)ENEEPPKPR_	2 Phospho (STY)	sp|Q96ST2|IWS1_HUMAN	1		_KET(ph)ES(ph)EAEDNLDDLEK_	2 Phospho (STY)	sp|Q8IYB3|SRRM1_HUMAN	1		_LTKPKS(ph)DES(ph)DEDTF_	2 Phospho (STY)	sp|Q9BS91|S35A5_HUMAN	0.999
_DIKEES(ph)DEEEEDDEESGRLR_	Oxidation (M),2 Phospho (STY)	sp|Q96EV2|RBM33_HUMAN	1		_DM(ox)DEPS(ph)PVPNVEEVTLPK_	Oxidation (M),2 Phospho (STY)	sp|Q8TAQ2|SMRC2_HUMAN	1		_DMS(ph)QM(ox)ILR_	Oxidation (M),Phospho (STY)	sp|Q9Y2J8|PADI2_HUMAN	1		_DRT(ph)PPLLYR_	Phospho (STY)	sp|Q96T37|RBM15_HUMAN	1		_DSDQVAQS(ph)DGEESPAAEEQLLGEHIK_	Phospho (STY)	sp|O94979|SC31A_HUMAN	1		_EKEIS(ph)DDEAEEEK_	Phospho (STY)	sp|P08238|HS90B_HUMAN	1		_GPGQPSS(ph)PQRLDR_	Phospho (STY)	sp|O95400|CD2B2_HUMAN	0.834		_HRPS(ph)PPAT(ph)PPPK_	2 Phospho (STY)	sp|Q8IYB3|SRRM1_HUMAN	1		_KET(ph)ESEAEDNLDDLEK_	Phospho (STY)	sp|Q8IYB3|SRRM1_HUMAN	0.999		_LTM(ox)S(ph)AVVKK_	Oxidation (M),Phospho (STY)	sp|Q9BUI4|RPC3_HUMAN	0.999
_DIPRT(ph)PSR_	Phospho (STY)	sp|Q9UQ35|SRRM2_HUMAN	1		_DM(ox)ES(ph)PTKLDVTLAK_	Phospho (STY)	sp|P27816|MAP4_HUMAN	1		_DNDS(ph)ESDYM(ox)FM(ox)APGAGAIPK_	2 Oxidation (M),Phospho (STY)	sp|O14654|IRS4_HUMAN	0.993		_DRVLDDVSIRS(ph)PETK_	Phospho (STY)	sp|Q12830|BPTF_HUMAN	0.999		_DSDYVYPSLES(ph)DEDNPIFK_	Phospho (STY)	sp|O75151|PHF2_HUMAN	0.935		_EKEM(ox)M(ox)QLY(ph)IR_	2 Oxidation (M),Phospho (STY)	sp|Q8WUF8|F172A_HUMAN	1		_GPKPEPPGSGS(ph)PAPPR_	Phospho (STY)	sp|Q9UKJ3|GPTC8_HUMAN	0.974		_HRRS(ph)PS(ph)VS(ph)S(ph)PEPAEK_	4 Phospho (STY)	sp|Q9UQ35|SRRM2_HUMAN	1		_KET(ph)PPPLVPPAAR_	Phospho (STY)	sp|Q9BQA1|MEP50_HUMAN	1		_LTPVS(ph)LSNS(ph)PIK_	2 Phospho (STY)	sp|P46100|ATRX_HUMAN	0.95
_DITDPLSLNTCT(ph)DEGHVVLASPLK_	Phospho (STY)	sp|Q7L2J0|MEPCE_HUMAN	0.821		_DM(ox)ESPT(ph)KLDVTLAK_	Phospho (STY)	sp|P27816|MAP4_HUMAN	0.86		_DNEEREQSSDLTPSGDVS(ph)PVKPLSR_	Phospho (STY)	sp|Q8WYQ5|DGCR8_HUMAN	1		_DS(ph)PDSPEPPNKKPLVEM(ox)DETPQVEK_	Phospho (STY)	sp|Q9NVM9|ASUN_HUMAN	0.928		_DSENLAS(ph)PSEYPENGER_	Phospho (STY)	sp|P52948|NUP98_HUMAN	1		_EKLQEEGGGS(ph)DEEETGSPSEDGMQSAR_	Phospho (STY)	sp|Q13610|PWP1_HUMAN	1		_GPPDFS(ph)S(ph)DEEREPTPVLGSGAAAAGR_	2 Phospho (STY)	sp|P42166|LAP2A_HUMAN	0.998		_HSDS(ph)IARS(ph)PCKS(ph)PK_	3 Phospho (STY)	sp|Q8WXF0|SRS12_HUMAN	0.998		_KET(ph)QSPEQVK_	Phospho (STY)	sp|Q9NYF8|BCLF1_HUMAN	0.999		_LTVS(ph)DGES(ph)GEEKK_	2 Phospho (STY)	sp|P46100|ATRX_HUMAN	1
_DITDPLSLNTCTDEGHVVLAS(ph)PLK_	Phospho (STY)	sp|Q7L2J0|MEPCE_HUMAN	1		_DM(ox)QPLS(ph)PISVHER_	Phospho (STY)	sp|P28749|RBL1_HUMAN	0.958		_DNEESEQPPVPGT(ph)PTLR_	Phospho (STY)	sp|O15439|MRP4_HUMAN	0.972		_DS(ph)VAS(ph)T(ph)ITGVM(ox)DKTK_	Phospho (STY)	sp|Q99541|PLIN2_HUMAN	0.967		_DSFDDRGPSLNPVLDYDHGS(ph)R_	Phospho (STY)	sp|P43243|MATR3_HUMAN	0.95		_EKPDS(ph)DDDLDIASLVTAK_	Phospho (STY)	sp|Q86V48|LUZP1_HUMAN	1		_GPPDFSS(ph)DEEREPTPVLGSGAAAAGR_	Phospho (STY)	sp|P42166|LAP2A_HUMAN	0.953		_HSDSGTSEASLS(ph)PPSS(ph)PPSRPR_	2 Phospho (STY)	sp|Q7Z4S6|KI21A_HUMAN	0.877		_KETES(ph)EAEDNLDDLEK_	Phospho (STY)	sp|Q8IYB3|SRRM1_HUMAN	1		_LVREDENDAS(ph)DDEDDDEK_	Phospho (STY)	sp|Q9Y5B6|PAXB1_HUMAN	1
_DKDDQEWESPS(ph)PPKPTVFISGVIAR_	Phospho (STY)	sp|P51397|DAP1_HUMAN	0.979		_DMDEPS(ph)PVPNVEEVTLPK_	Phospho (STY)	sp|Q8TAQ2|SMRC2_HUMAN	1		_DNPS(ph)PEPQLDDIKR_	Phospho (STY)	sp|Q96JC9|EAF1_HUMAN	1		_DSAIPVES(ph)DT(ph)DDEGAPR_	Phospho (STY)	sp|Q96D46|NMD3_HUMAN	1		_DSGRGDS(ph)VSDSGSDALR_	Phospho (STY)	sp|Q53EL6|PDCD4_HUMAN	0.958		_EKPELSEPSHLNGPSS(ph)DPEAAFLSR_	Phospho (STY)	sp|Q9H4A3|WNK1_HUMAN	0.863		_GPPS(ph)PPAPVM(ox)HS(ph)PSR_	Oxidation (M),2 Phospho (STY)	sp|Q13573|SNW1_HUMAN	0.981		_HSDSIARS(ph)PCKS(ph)PK_	2 Phospho (STY)	sp|Q8WXF0|SRS12_HUMAN	0.961		_KETQS(ph)PEQVK_	Phospho (STY)	sp|Q9NYF8|BCLF1_HUMAN	0.99		_LYADS(ph)DS(ph)GDDSDKR_	2 Phospho (STY)	sp|O43896|KIF1C_HUMAN	1
_DKDVTLS(ph)PVK_	Phospho (STY)	sp|Q8NFC6|BD1L1_HUMAN	0.975		_DMES(ph)PTKLDVTLAK_	Phospho (STY)	sp|P27816|MAP4_HUMAN	1		_DNQES(ph)SDAELSSSEYIK_	Phospho (STY)	sp|Q96JM3|CHAP1_HUMAN	0.908		_DSAIPVESDT(ph)DDEGAPR_	Phospho (STY)	sp|Q96D46|NMD3_HUMAN	0.962		_DSGSDQDLDGAGVRAS(ph)DLEDEESAAR_	Phospho (STY)	sp|Q86VM9|ZCH18_HUMAN	1		_EKRT(ph)PAPEPEPCEASELPAK_	Phospho (STY)	sp|Q9ULV3|CIZ1_HUMAN	1		_GPPS(ph)PPAPVM(ox)HS(ph)PSRK_	Oxidation (M),2 Phospho (STY)	sp|Q13573|SNW1_HUMAN	0.995		_HSS(ph)IS(ph)PSTLTLK_	2 Phospho (STY)	sp|Q14004|CDK13_HUMAN	0.989		_KFEES(ph)R_	Phospho (STY)	sp|Q8NF91|SYNE1_HUMAN	1		_M(ox)AESPCSPSGQQPPS(ph)PPS(ph)PDELPANVK_	Oxidation (M),2 Phospho (STY)	sp|Q14160|SCRIB_HUMAN	0.994
_DKEIS(ph)PSVTK_	Phospho (STY)	sp|Q8N488|RYBP_HUMAN	0.927		_DNDS(ph)ESDYM(ox)FM(ox)APGAGAIPK_	Phospho (STY)	sp|O14654|IRS4_HUMAN	0.985		_DNQESS(ph)DAELS(ph)SSEYIK_	2 Phospho (STY)	sp|Q96JM3|CHAP1_HUMAN	0.958		_DSALAEAPEGLS(ph)PAPPAR_	Phospho (STY)	sp|Q9H9J4|UBP42_HUMAN	1		_DSISAVSSEKVS(ph)PSK_	Phospho (STY)	sp|P46821|MAP1B_HUMAN	0.999		_EKS(ph)PVREPVDNLSPEER_	Phospho (STY)	sp|Q86U06|RBM23_HUMAN	1		_GPRT(ph)PS(ph)PPPPIPEDIALGK_	2 Phospho (STY)	sp|Q5T200|ZC3HD_HUMAN	1		_HSTPSNSSNPSGPPS(ph)PNS(ph)PHR_	2 Phospho (STY)	sp|Q9Y5S2|MRCKB_HUMAN	1		_KGDVEGSQS(ph)QDEGEGSGESER_	Phospho (STY)	sp|Q9UQE7|SMC3_HUMAN	0.996		_M(ox)DRTET(ph)R_	Oxidation (M),Phospho (STY)	sp|Q495Y8|SPDE2_HUMAN	0.999
_DKEVS(ph)DDEAEEK_	Phospho (STY)	sp|P07900|HS90A_HUMAN	1		_DNEEREQSSDLTPSGDVS(ph)PVKPLSR_	Phospho (STY)	sp|Q8WYQ5|DGCR8_HUMAN	1		_DNQESS(ph)DAELSS(ph)SEYIK_	2 Phospho (STY)	sp|Q96JM3|CHAP1_HUMAN	0.895		_DSDQVAQS(ph)DGEESPAAEEQLLGEHIK_	Phospho (STY)	sp|O94979|SC31A_HUMAN	1		_DSISS(ph)DSETSEPLSCR_	Phospho (STY)	sp|O75164|KDM4A_HUMAN	0.984		_EKT(ph)PELPEPSVK_	Phospho (STY)	sp|Q8IYB3|SRRM1_HUMAN	1		_GPS(ph)PSPVGSPASVAQSR_	Phospho (STY)	sp|O14497|ARI1A_HUMAN	1		_HT(ph)LGDSDNES_	Phospho (STY)	sp|P02794|FRIH_HUMAN	0.999		_KGGEFDEFVNDDT(ph)DDDLPISK_	Phospho (STY)	sp|Q6PD62|CTR9_HUMAN	1		_M(ox)FT(ph)VEAY(ph)DIELNK_	Oxidation (M),2 Phospho (STY)	sp|Q8NFY9|KBTB8_HUMAN	1
_DKFS(ph)PFPVQDRPESSLVFK_	Phospho (STY)	sp|Q9UQ35|SRRM2_HUMAN	1		_DNEESEQPPVPGT(ph)PTLR_	Phospho (STY)	sp|O15439|MRP4_HUMAN	0.997		_DNQESS(ph)DAELSSSEYIK_	Phospho (STY)	sp|Q96JM3|CHAP1_HUMAN	0.947		_DSDQVAQS(ph)DGEESPAAEEQLLGEHIKEEK_	Phospho (STY)	sp|O94979|SC31A_HUMAN	0.997		_DSLIT(ph)PHVS(ph)R_	2 Phospho (STY)	sp|P49792|RBP2_HUMAN	1		_EKT(ph)PS(ph)PKEEDEEPESPPEK_	2 Phospho (STY)	sp|Q9H1E3|NUCKS_HUMAN	1		_GPSQEEEDNHS(ph)DEEDRASEPK_	Phospho (STY)	sp|Q86VM9|ZCH18_HUMAN	1		_HTGPNS(ph)PDTANDGFVR_	Phospho (STY)	sp|P31943|HNRH1_HUMAN	1		_KGNAEGS(ph)S(ph)DEEGKLVIDEPAK_	2 Phospho (STY)	sp|P51858|HDGF_HUMAN	1		_M(ox)LAES(ph)DES(ph)GDEESVSQTDKTELQNTLR_	Oxidation (M),2 Phospho (STY)	sp|P22059|OSBP1_HUMAN	1
_DKM(ox)EGS(ph)DFESSGGR_	Phospho (STY)	sp|Q8WYH8|ING5_HUMAN	1		_DNPS(ph)PEPQLDDIKR_	Phospho (STY)	sp|Q96JC9|EAF1_HUMAN	1		_DNS(ph)NS(ph)DS(ph)EGEDRRPAGPPREPVR_	3 Phospho (STY)	sp|Q8NCF5|NF2IP_HUMAN	1		_DSENLAS(ph)PSEYPENGER_	2 Phospho (STY)	sp|P52948|NUP98_HUMAN	1		_DSLITPHVS(ph)R_	Phospho (STY)	sp|P49792|RBP2_HUMAN	0.999		_EKT(ph)PSPKEEDEEPES(ph)PPEK_	2 Phospho (STY)	sp|Q9H1E3|NUCKS_HUMAN	0.983		_GPSS(ph)VEDIK_	Phospho (STY)	sp|P06748|NPM_HUMAN	1		_HVIADQEVM(ox)ETNRVES(ph)VEPS(ph)ENEASK_	Oxidation (M),2 Phospho (STY)	sp|Q9H307|PININ_HUMAN	0.971		_KGNS(ph)PNSEPPTPK_	Phospho (STY)	sp|P48634|PRC2A_HUMAN	1		_M(ox)LPHAPGVQM(ox)QAIPEDAIPEES(ph)GDEDEDDPDK_	2 Oxidation (M),Phospho (STY)	sp|Q13547|HDAC1_HUMAN	1
_DKRPLS(ph)GPDVGTPQPAGLASGAK_	Phospho (STY)	sp|O96013|PAK4_HUMAN	1		_DNQES(ph)SDAELSSSEYIK_	Phospho (STY)	sp|Q96JM3|CHAP1_HUMAN	0.856		_DNS(ph)PLREK_	Phospho (STY)	sp|Q5VUA4|ZN318_HUMAN	1		_DSGRGDS(ph)VSDSGSDALR_	2 Phospho (STY)	sp|Q53EL6|PDCD4_HUMAN	0.982		_DSLITPHVSRS(ph)S(ph)T(ph)PRES(ph)PCGK_	4 Phospho (STY)	sp|P49792|RBP2_HUMAN	0.984		_EKTPSPKEEDEEPES(ph)PPEK_	Phospho (STY)	sp|Q9H1E3|NUCKS_HUMAN	1		_GPTTGEGALDLSDVHS(ph)PPKS(ph)PEGK_	2 Phospho (STY)	sp|O95684|FR1OP_HUMAN	1		_IAAPELHKGDS(ph)DS(ph)EEDEPTK_	2 Phospho (STY)	sp|Q92733|PRCC_HUMAN	1		_KGS(ph)ITEYTAAEEK_	Phospho (STY)	sp|Q12982|BNIP2_HUMAN	0.967		_M(ox)LPHAPGVQM(ox)QAIPEDAIPEES(ph)GDEDEDDPDKR_	2 Oxidation (M),Phospho (STY)	sp|Q13547|HDAC1_HUMAN	1
_DKS(ph)PVREPIDNLTPEER_	Phospho (STY)	sp|Q14498|RBM39_HUMAN	1		_DNQESS(ph)DAELS(ph)SSEYIK_	Phospho (STY)	sp|Q96JM3|CHAP1_HUMAN	0.926		_DNS(ph)PPPAFKPEPPK_	Phospho (STY)	sp|Q9UDY2|ZO2_HUMAN	1		_DSGSDQDLDGAGVRAS(ph)DLEDEESAAR_	Phospho (STY)	sp|Q86VM9|ZCH18_HUMAN	1		_DSNAPKS(ph)PLTGYVR_	Phospho (STY)	sp|Q9NP66|HM20A_HUMAN	0.945		_ELDQDM(ox)VT(ph)EDEDDPGSHK_	Oxidation (M),Phospho (STY)	sp|Q9NRL2|BAZ1A_HUMAN	1		_GRDS(ph)PYQSR_	Phospho (STY)	sp|Q13242|SRSF9_HUMAN	1		_IDASKNEEDEGHS(ph)NSS(ph)PR_	2 Phospho (STY)	sp|Q14103|HNRPD_HUMAN	0.946		_KIEEAM(ox)DGSET(ph)PQLFTVLPEK_	Oxidation (M),Phospho (STY)	sp|Q13435|SF3B2_HUMAN	0.988		_M(ox)LPHAPGVQM(ox)QAIPEDAVHEDS(ph)GDEDGEDPDK_	2 Oxidation (M),Phospho (STY)	sp|Q92769|HDAC2_HUMAN	1
_DKTESVTSGPM(ox)SPEGSPS(ph)KSPSK_	Phospho (STY)	sp|P35612|ADDB_HUMAN	0.895		_DNQESS(ph)DAELSSSEYIK_	Phospho (STY)	sp|Q96JM3|CHAP1_HUMAN	0.905		_DNSNS(ph)DS(ph)EGEDRRPAGPPREPVR_	2 Phospho (STY)	sp|Q8NCF5|NF2IP_HUMAN	0.948		_DSISAVSSEKVS(ph)PSK_	Phospho (STY)	sp|P46821|MAP1B_HUMAN	0.994		_DSPDS(ph)PEPPNK_	Phospho (STY)	sp|Q9NVM9|ASUN_HUMAN	1		_ELDQDMVT(ph)EDEDDPGSHK_	Phospho (STY)	sp|Q9NRL2|BAZ1A_HUMAN	1		_GRECS(ph)PTSSLER_	Phospho (STY)	sp|Q9P1Y6|PHRF1_HUMAN	0.851		_IDASKNEEDEGHSNS(ph)S(ph)PR_	2 Phospho (STY)	sp|Q14103|HNRPD_HUMAN	0.9		_KIEEAMDGSET(ph)PQLFTVLPEK_	Phospho (STY)	sp|Q13435|SF3B2_HUMAN	0.976		_M(ox)LPHAPGVQM(ox)QAIPEDAVHEDS(ph)GDEDGEDPDKR_	2 Oxidation (M),Phospho (STY)	sp|Q92769|HDAC2_HUMAN	1
_DLDEDELLGNLS(ph)ETELK_	Phospho (STY)	sp|Q9NYL9|TMOD3_HUMAN	0.942		_DNS(ph)PLREK_	Phospho (STY)	sp|Q5VUA4|ZN318_HUMAN	1		_DNTFFRES(ph)PVGR_	Phospho (STY)	sp|Q8NEY8|PPHLN_HUMAN	1		_DSLIT(ph)PHVS(ph)R_	Phospho (STY)	sp|P49792|RBP2_HUMAN	1		_DSS(ph)PGSSSTSLLIK_	Phospho (STY)	sp|Q99550|MPP9_HUMAN	0.837		_ELEEEEENS(ph)DEDELDSHTMVK_	Phospho (STY)	sp|Q13188|STK3_HUMAN	1		_GRGPS(ph)PEGSSSTESSPEHPPK_	Phospho (STY)	sp|Q9UQ35|SRRM2_HUMAN	1		_IDASKNEEDEGHSNSS(ph)PR_	Phospho (STY)	sp|Q14103|HNRPD_HUMAN	0.994		_KKEEPSQNDIS(ph)PK_	Phospho (STY)	sp|Q9NR30|DDX21_HUMAN	1		_M(ox)NEEISS(ph)DS(ph)ESESLAPR_	Oxidation (M),2 Phospho (STY)	sp|O43818|U3IP2_HUMAN	0.927
_DLDEDELLGNLSET(ph)ELK_	Phospho (STY)	sp|Q9NYL9|TMOD3_HUMAN	0.852		_DNS(ph)PPPAFKPEPPK_	Oxidation (M),Phospho (STY)	sp|Q9UDY2|ZO2_HUMAN	1		_DNTRPGANS(ph)PEM(ox)WSEAIK_	Oxidation (M),Phospho (STY)	sp|Q92499|DDX1_HUMAN	1		_DSLIT(ph)PHVSR_	Phospho (STY)	sp|P49792|RBP2_HUMAN	0.995		_DSSDSADGRAT(ph)PSENLVPSSAR_	Phospho (STY)	sp|Q8N684|CPSF7_HUMAN	0.987		_ELEKKFQQT(ph)AAY(ph)R_	2 Phospho (STY)	sp|Q9NQ48|LZTL1_HUMAN	1		_GRLDSSEM(ox)DHS(ph)ENEDYTM(ox)SSPLPGK_	2 Oxidation (M),Phospho (STY)	sp|Q9NTI5|PDS5B_HUMAN	0.991		_IDDRDS(ph)DEEGASDR_	Phospho (STY)	sp|Q8TDD1|DDX54_HUMAN	1		_KKEPAITSQNS(ph)PEAR_	Phospho (STY)	sp|P23193|TCEA1_HUMAN	1		_M(ox)NNEEDLLQEDS(ph)T(ph)R_	Oxidation (M),2 Phospho (STY)	sp|Q5TDP6|LGSN_HUMAN	1
_DLDEEGS(ph)EK_	Oxidation (M),Phospho (STY)	sp|O43719|HTSF1_HUMAN	1		_DNTFFRES(ph)PVGR_	Oxidation (M),Phospho (STY)	sp|Q8NEY8|PPHLN_HUMAN	1		_DPAQPM(ox)S(ph)PGEATQSGARPADR_	Oxidation (M),Phospho (STY)	sp|Q9BQG0|MBB1A_HUMAN	1		_DSLS(ph)PVLHPSDLILTR_	Phospho (STY)	sp|Q9HCN4|GPN1_HUMAN	0.844		_DSVAS(ph)T(ph)IT(ph)GVM(ox)DKTK_	Oxidation (M),3 Phospho (STY)	sp|Q99541|PLIN2_HUMAN	0.884		_ELGGLEGDPS(ph)PEEDEGIQK_	Phospho (STY)	sp|Q9BT09|CNPY3_HUMAN	1		_GRLS(ph)PVPVPR_	Phospho (STY)	sp|Q9UKM9|RALY_HUMAN	1		_IDEDGENTQIEDTEPM(ox)S(ph)PVLNSK_	Oxidation (M),Phospho (STY)	sp|Q12888|TP53B_HUMAN	1		_KKS(ph)PNELVDDLFK_	Phospho (STY)	sp|Q9UNZ2|NSF1C_HUMAN	1		_M(ox)PQDGS(ph)DDEDEEWPTLEK_	Oxidation (M),Phospho (STY)	sp|Q13895|BYST_HUMAN	1
_DLDRPESQS(ph)PK_	Oxidation (M),Phospho (STY)	sp|Q8WUA4|TF3C2_HUMAN	1		_DNTRPGANS(ph)PEM(ox)WSEAIK_	Phospho (STY)	sp|Q92499|DDX1_HUMAN	0.994		_DPSSGQEVAT(ph)PPVPQLQVCEPK_	Phospho (STY)	sp|Q9UKV3|ACINU_HUMAN	0.994		_DSNAPKS(ph)PLTGYVR_	Phospho (STY)	sp|Q9NP66|HM20A_HUMAN	0.981		_DSYSSSRS(ph)DLYSSGR_	Phospho (STY)	sp|P38159|RBMX_HUMAN	0.91		_ELLDLS(ph)R_	Phospho (STY)	sp|O14686|KMT2D_HUMAN	1		_GRPPAEKLS(ph)PNPPK_	Phospho (STY)	sp|P51531|SMCA2_HUMAN	1		_IDENS(ph)DKEMEVEES(ph)PEK_	2 Phospho (STY)	sp|Q8N3X1|FNBP4_HUMAN	1		_KLESVFFHS(ph)LS(ph)GSKS(ph)S(ph)R_	4 Phospho (STY)	sp|Q8NEF9|SRFB1_HUMAN	0.826		_M(ox)SCFSRPS(ph)M(ox)S(ph)PTPLDR_	2 Oxidation (M),2 Phospho (STY)	sp|Q9UQ35|SRRM2_HUMAN	0.815
_DLEPGEVPS(ph)DSDEDGEHK_	Oxidation (M),2 Phospho (STY)	sp|Q96T58|MINT_HUMAN	0.858		_DPAQPM(ox)S(ph)PGEATQSGARPADR_	Phospho (STY)	sp|Q9BQG0|MBB1A_HUMAN	1		_DQEPKPS(ph)PEPAAVSR_	Phospho (STY)	sp|Q9H7S9|ZN703_HUMAN	1		_DSPAFPDS(ph)PWR_	2 Phospho (STY)	sp|Q9NQS7|INCE_HUMAN	1		_DTASLSTTPSES(ph)PR_	Phospho (STY)	sp|Q9NQX3|GEPH_HUMAN	0.976		_ELLVSQHTVQLVGGLS(ph)PLSSPSDTK_	Phospho (STY)	sp|Q9UKV3|ACINU_HUMAN	1		_GRPPAEKLS(ph)PNPPNLTK_	Phospho (STY)	sp|P51532|SMCA4_HUMAN	1		_IDIS(ph)PSTFR_	Phospho (STY)	sp|Q9Y2W1|TR150_HUMAN	1		_KLGAGEGGEASVS(ph)PEK_	Phospho (STY)	sp|Q13428|TCOF_HUMAN	1		_MEES(ph)PLSRAPS(ph)R_	2 Phospho (STY)	sp|Q9P1Z2|CACO1_HUMAN	0.998
_DLEPGEVPSDS(ph)DEDGEHK_	Phospho (STY)	sp|Q96T58|MINT_HUMAN	0.977		_DPSSGQEVAT(ph)PPVPQLQVCEPK_	Phospho (STY)	sp|Q9UKV3|ACINU_HUMAN	0.858		_DQHLNNSSSS(ph)PQR_	Phospho (STY)	sp|Q15154|PCM1_HUMAN	0.998		_DSQDAS(ph)AEQSDHDDEVASLASASGGFGTK_	Phospho (STY)	sp|Q6P2E9|EDC4_HUMAN	0.981		_DTDGGPKEEES(ph)PV_	Phospho (STY)	sp|P53985|MOT1_HUMAN	1		_ELS(ph)NS(ph)PLRENSFGS(ph)PLEFR_	3 Phospho (STY)	sp|Q9UQ35|SRRM2_HUMAN	0.991		_GRS(ph)IDQDYER_	Phospho (STY)	sp|Q9UDY2|ZO2_HUMAN	1		_IDIS(ph)PSTLR_	Phospho (STY)	sp|Q9NYF8|BCLF1_HUMAN	1		_KLGVS(ph)VSPSR_	Phospho (STY)	sp|Q86VM9|ZCH18_HUMAN	0.868		_NAIAS(ph)DSEADS(ph)DTEVPK_	2 Phospho (STY)	sp|Q8WVC0|LEO1_HUMAN	0.966
_DLESCS(ph)DDDNQGSK_	Phospho (STY)	sp|Q5T3I0|GPTC4_HUMAN	1		_DPVPRRS(ph)PR_	Phospho (STY)	sp|Q96T37|RBM15_HUMAN	1		_DQKKVM(ox)VM(ox)T(ph)S(ph)S(ph)EHTETK_	2 Oxidation (M),3 Phospho (STY)	sp|A4UGR9|XIRP2_HUMAN	0.988		_DSSDSADGRAT(ph)PSENLVPSSAR_	Phospho (STY)	sp|Q8N684|CPSF7_HUMAN	0.99		_DTDVEEGS(ph)EVEDERPAWNSK_	Phospho (STY)	sp|Q9H2J7|S6A15_HUMAN	1		_ELS(ph)NS(ph)PLRENSFGSPLEFR_	2 Phospho (STY)	sp|Q9UQ35|SRRM2_HUMAN	1		_GRS(ph)PSQYHDFAEK_	Phospho (STY)	sp|Q9UGU0|TCF20_HUMAN	0.995		_IEALKATAAS(ph)LSS(ph)R_	2 Phospho (STY)	sp|Q5VT06|CE350_HUMAN	0.932		_KLGVSVS(ph)PSR_	Phospho (STY)	sp|Q86VM9|ZCH18_HUMAN	0.968		_NAIASDS(ph)EADS(ph)DTEVPK_	2 Phospho (STY)	sp|Q8WVC0|LEO1_HUMAN	0.858
_DLFDLNS(ph)SEEDDTEGFSER_	Phospho (STY)	sp|Q9Y3T9|NOC2L_HUMAN	0.971		_DQDLASCDRDRSS(ph)R_	2 Phospho (STY)	sp|Q9Y383|LC7L2_HUMAN	0.819		_DQPDGSSLS(ph)PAQS(ph)PSQSQPPAASSLREPGLESK_	2 Phospho (STY)	sp|Q6WCQ1|MPRIP_HUMAN	0.88		_DTDGGPKEEES(ph)PV_	Phospho (STY)	sp|P53985|MOT1_HUMAN	1		_DTFEHDPSES(ph)IDEFNK_	Phospho (STY)	sp|Q9NYF8|BCLF1_HUMAN	1		_ELS(ph)PAALEK_	Phospho (STY)	sp|O75683|SURF6_HUMAN	1		_GRS(ph)RT(ph)PPTSR_	2 Phospho (STY)	sp|Q9UQ35|SRRM2_HUMAN	0.959		_IEDVGS(ph)DEEDDS(ph)GKDKK_	2 Phospho (STY)	sp|P08238|HS90B_HUMAN	1		_KLPPPPPQAPPEEENES(ph)EPEEPSGVEGAAFQSR_	Phospho (STY)	sp|O60341|KDM1A_HUMAN	0.996		_NAS(ph)AS(ph)FQELEDKK_	2 Phospho (STY)	sp|Q99543|DNJC2_HUMAN	1
_DLFDLNSS(ph)EEDDTEGFSER_	2 Phospho (STY)	sp|Q9Y3T9|NOC2L_HUMAN	0.928		_DQEPKPS(ph)PEPAAVSR_	Phospho (STY)	sp|Q9H7S9|ZN703_HUMAN	1		_DQPDGSSLS(ph)PAQSPSQSQPPAASSLR_	Phospho (STY)	sp|Q6WCQ1|MPRIP_HUMAN	0.826		_DTDVEEGS(ph)EVEDERPAWNSK_	Phospho (STY)	sp|Q9H2J7|S6A15_HUMAN	1		_DTHEDHDTSTENT(ph)DESNHDPQFEPIVSLPEQEIK_	Phospho (STY)	sp|P43487|RANG_HUMAN	0.837		_ELS(ph)PAGSISK_	Phospho (STY)	sp|O95453|PARN_HUMAN	0.999		_GRSECDSS(ph)PEPK_	Phospho (STY)	sp|Q9UQ35|SRRM2_HUMAN	0.939		_IEDVGS(ph)DEEDDSGK_	Phospho (STY)	sp|P08238|HS90B_HUMAN	1		_KLS(ph)GDQITLPTTVDYSSVPK_	Phospho (STY)	sp|O00559|RCAS1_HUMAN	1		_NDKS(ph)EEEQSSSSVK_	Phospho (STY)	sp|P07910|HNRPC_HUMAN	1
_DLFDYS(ph)PPLHK_	Phospho (STY)	sp|Q9NYF8|BCLF1_HUMAN	1		_DQHLNNSSSS(ph)PQR_	Phospho (STY)	sp|Q15154|PCM1_HUMAN	0.968		_DQQPS(ph)GS(ph)EGEDDDAEAALKK_	2 Phospho (STY)	sp|Q9NXG2|THUM1_HUMAN	1		_DTDVEEGSEVEDERPAWNS(ph)K_	2 Phospho (STY)	sp|Q9H2J7|S6A15_HUMAN	0.94		_DTPRPDHPPHDGHS(ph)PASR_	Phospho (STY)	sp|Q9C0J8|WDR33_HUMAN	0.826		_ELSDQATAS(ph)PIVAR_	Phospho (STY)	sp|Q5JSH3|WDR44_HUMAN	0.996		_GS(ph)GTASDDEFENLR_	Phospho (STY)	sp|Q7Z6Z7|HUWE1_HUMAN	0.974		_IEDVGS(ph)DEEDDSGKDK_	Phospho (STY)	sp|P08238|HS90B_HUMAN	1		_KLS(ph)GDQPAAR_	Phospho (STY)	sp|Q13428|TCOF_HUMAN	1		_NDLQDTEIS(ph)PR_	Phospho (STY)	sp|Q9NS91|RAD18_HUMAN	0.999
_DLFSLDSEDPSPAS(ph)PPLR_	Phospho (STY)	sp|Q9BTK6|PAGR1_HUMAN	1		_DQKKVM(ox)VM(ox)T(ph)S(ph)S(ph)EHTETK_	Phospho (STY)	sp|A4UGR9|XIRP2_HUMAN	0.995		_DQS(ph)PFSK_	Phospho (STY)	sp|Q13427|PPIG_HUMAN	0.996		_DTFEHDPSES(ph)IDEFNK_	2 Phospho (STY)	sp|Q9NYF8|BCLF1_HUMAN	1		_DTQS(ph)PSTCSEGLLGWSQK_	Phospho (STY)	sp|Q9C0C2|TB182_HUMAN	0.979		_ELSESVQQQSTPVPLIS(ph)PK_	Phospho (STY)	sp|Q9ULU4|PKCB1_HUMAN	1		_GS(ph)PDGSLQTGKPSAPK_	Phospho (STY)	sp|Q8IZL8|PELP1_HUMAN	0.999		_IEEVLS(ph)PEGS(ph)PS(ph)KSPSKK_	3 Phospho (STY)	sp|Q9UEY8|ADDG_HUMAN	0.873		_KLSSWDQAET(ph)PGHT(ph)PSLR_	2 Phospho (STY)	sp|O75533|SF3B1_HUMAN	0.901		_NDQEPPPEALDFS(ph)DDEK_	Phospho (STY)	sp|Q96HR8|NAF1_HUMAN	1
_DLGSTEDGDGT(ph)DDFLTDKEDEK_	Phospho (STY)	sp|Q15527|SURF2_HUMAN	1		_DQQNLPYGVTPAS(ph)PSGHSQGR_	Oxidation (M),Phospho (STY)	sp|Q7KZI7|MARK2_HUMAN	0.998		_DQS(ph)PPPS(ph)PPPSYHPPPPPTK_	2 Phospho (STY)	sp|Q9P206|K1522_HUMAN	0.941		_DTHEDHDTSTENT(ph)DESNHDPQFEPIVSLPEQEIK_	Phospho (STY)	sp|P43487|RANG_HUMAN	0.839		_DTS(ph)GLER_	Phospho (STY)	sp|Q9H307|PININ_HUMAN	1		_ELSNS(ph)PLR_	Phospho (STY)	sp|Q9UQ35|SRRM2_HUMAN	0.998		_GS(ph)PHYFS(ph)PFRPY_	2 Phospho (STY)	sp|Q13242|SRSF9_HUMAN	0.999		_IEEVLS(ph)PEGS(ph)PSK_	2 Phospho (STY)	sp|Q9UEY8|ADDG_HUMAN	0.946		_KLSVPTS(ph)DEEDEVPAPKPR_	Phospho (STY)	sp|Q8NE71|ABCF1_HUMAN	0.843		_NDREYDS(ph)GDT(ph)DEIIAM(ox)K_	Oxidation (M),2 Phospho (STY)	sp|Q76FK4|NOL8_HUMAN	1
_DLLHPS(ph)PEEEK_	Oxidation (M),Phospho (STY)	sp|P42677|RS27_HUMAN	1		_DQQPS(ph)GS(ph)EGEDDDAEAALKK_	Phospho (STY)	sp|Q9NXG2|THUM1_HUMAN	1		_DQSPFS(ph)K_	Phospho (STY)	sp|Q13427|PPIG_HUMAN	0.833		_DTIIDVVGAPLT(ph)PNSR_	Phospho (STY)	sp|Q9NPF5|DMAP1_HUMAN	0.992		_DTS(ph)PSSGSAVSSSK_	Phospho (STY)	sp|Q8NEY8|PPHLN_HUMAN	0.999		_ELSNS(ph)PLRENS(ph)FGSPLEFR_	2 Phospho (STY)	sp|Q9UQ35|SRRM2_HUMAN	0.963		_GS(ph)PHYFSPFRPY_	Phospho (STY)	sp|Q13242|SRSF9_HUMAN	1		_IEEVLS(ph)PEGS(ph)PSKS(ph)PSK_	3 Phospho (STY)	sp|Q9UEY8|ADDG_HUMAN	0.967		_KLTS(ph)DEEGEPSGK_	Phospho (STY)	sp|Q8WVC0|LEO1_HUMAN	0.989		_NEEPS(ph)EEEIDAPKPK_	Phospho (STY)	sp|Q9NR30|DDX21_HUMAN	1
_DLLPS(ph)PAGPVPSK_	Phospho (STY)	sp|Q9UHB7|AFF4_HUMAN	1		_DQS(ph)PFSK_	Phospho (STY)	sp|Q13427|PPIG_HUMAN	1		_DREPHGYS(ph)PER_	Phospho (STY)	sp|Q9HCM7|FBSL_HUMAN	0.869		_DTLRT(ph)PPRER_	Phospho (STY)	sp|Q9UQ35|SRRM2_HUMAN	0.998		_DTSATSQS(ph)VNGSPQAEQPSLESTSK_	Phospho (STY)	sp|Q86WB0|NIPA_HUMAN	0.875		_ELSNS(ph)PLRENSFGS(ph)PLEFR_	2 Phospho (STY)	sp|Q9UQ35|SRRM2_HUMAN	0.958		_GS(ph)PTGGAQLLK_	Phospho (STY)	sp|Q14684|RRP1B_HUMAN	0.997		_IEEVLS(ph)PEGSPS(ph)K_	2 Phospho (STY)	sp|Q9UEY8|ADDG_HUMAN	0.888		_KPATPAEDDEDDDIDLFGS(ph)DNEEEDK_	Phospho (STY)	sp|P29692|EF1D_HUMAN	1		_NEGS(ph)ES(ph)APEGQAQQR_	2 Phospho (STY)	sp|P67809|YBOX1_HUMAN	1
_DLLSDLQDIS(ph)DSER_	Oxidation (M),Phospho (STY)	sp|P21127|CD11B_HUMAN	0.998		_DQS(ph)PSRAPGLR_	Phospho (STY)	sp|P09601|HMOX1_HUMAN	0.979		_DRES(ph)RS(ph)PFLKPDER_	2 Phospho (STY)	sp|Q9H7N4|SFR19_HUMAN	1		_DTPRPDHPPHDGHS(ph)PASR_	2 Phospho (STY)	sp|Q9C0J8|WDR33_HUMAN	0.999		_DTSATSQSVNGS(ph)PQAEQPSLESTSK_	Phospho (STY)	sp|Q86WB0|NIPA_HUMAN	1		_ELSNS(ph)PLRENSFGSPLEFR_	Phospho (STY)	sp|Q9UQ35|SRRM2_HUMAN	0.979		_GS(ph)PVFLPR_	Phospho (STY)	sp|Q9NYV4|CDK12_HUMAN	1		_IEEVLSPEGS(ph)PSKS(ph)PSK_	2 Phospho (STY)	sp|Q9UEY8|ADDG_HUMAN	0.999		_KPATPAEDDEDDDIDLFGS(ph)DNEEEDKEAAQLR_	Phospho (STY)	sp|P29692|EF1D_HUMAN	1		_NEGS(ph)ESAPEGQAQQR_	Phospho (STY)	sp|P67809|YBOX1_HUMAN	1
_DLPAQRGEES(ph)S(ph)EEEEK_	Phospho (STY)	sp|Q9BW71|HIRP3_HUMAN	1		_DQSEPLGRVLS(ph)R_	Phospho (STY)	sp|Q6L8Q7|PDE12_HUMAN	1		_DRGLDS(ph)GAET(ph)EEEK_	2 Phospho (STY)	sp|P78559|MAP1A_HUMAN	1		_DTQS(ph)PSTCSEGLLGWSQK_	Phospho (STY)	sp|Q9C0C2|TB182_HUMAN	0.818		_DTSPDKGELVS(ph)DEEEDT_	Phospho (STY)	sp|Q9UPU7|TBD2B_HUMAN	1		_EM(ox)EHNTVCAAGTS(ph)PVGEIGEEK_	Oxidation (M),Phospho (STY)	sp|P18583|SON_HUMAN	0.99		_GS(ph)SPSHSATSVHTSV_	Phospho (STY)	sp|Q13613|MTMR1_HUMAN	0.854		_IEEVLSPEGSPS(ph)KS(ph)PSK_	2 Phospho (STY)	sp|Q9UEY8|ADDG_HUMAN	0.804		_KPATPAEDDEDDDIDLFGS(ph)DNEEEDKEAAQLREER_	Phospho (STY)	sp|P29692|EF1D_HUMAN	1		_NEGS(ph)PS(ph)PRQS(ph)PK_	3 Phospho (STY)	sp|Q5T200|ZC3HD_HUMAN	1
_DLPDGHAAS(ph)PR_	Phospho (STY)	sp|Q9P1Y5|CAMP3_HUMAN	1		_DRCPLPCIPTLIGT(ph)PVK_	Phospho (STY)	sp|Q9H0H5|RGAP1_HUMAN	0.999		_DRGLDS(ph)GAET(ph)EEEKDTWEEK_	2 Phospho (STY)	sp|P78559|MAP1A_HUMAN	1		_DTS(ph)PSSGSAVSSSK_	Phospho (STY)	sp|Q8NEY8|PPHLN_HUMAN	0.998		_DTTVIS(ph)HSPNTSYDTALEAR_	Phospho (STY)	sp|Q4VCS5|AMOT_HUMAN	0.99		_EMEHNTVCAAGT(ph)SPVGEIGEEK_	Phospho (STY)	sp|P18583|SON_HUMAN	0.927		_GSFS(ph)DTGLGDGK_	Phospho (STY)	sp|Q9Y2W1|TR150_HUMAN	0.976		_IES(ph)DEEEDFENVGK_	Phospho (STY)	sp|Q96T23|RSF1_HUMAN	1		_KPGDGEVSPSTEDAPFQHS(ph)PLGK_	Phospho (STY)	sp|O60318|GANP_HUMAN	1		_NEGSES(ph)APEGQAQQR_	Phospho (STY)	sp|P67809|YBOX1_HUMAN	1
_DLPS(ph)PDSR_	Phospho (STY)	sp|Q9UGU0|TCF20_HUMAN	0.994		_DREPHGYS(ph)PER_	Phospho (STY)	sp|Q9HCM7|FBSL_HUMAN	0.988		_DRHDT(ph)PDPS(ph)PR_	2 Phospho (STY)	sp|Q9BRD0|BUD13_HUMAN	1		_DTSATSQSVNGS(ph)PQAEQPSLESTSK_	Phospho (STY)	sp|Q86WB0|NIPA_HUMAN	0.995		_DTTVISHS(ph)PNTSYDTALEAR_	Phospho (STY)	sp|Q4VCS5|AMOT_HUMAN	0.995		_EMEHNTVCAAGTS(ph)PVGEIGEEK_	Phospho (STY)	sp|P18583|SON_HUMAN	1		_GSGS(ph)PTHSLSQK_	Phospho (STY)	sp|Q9BSJ6|FA64A_HUMAN	0.861		_IEVKEES(ph)PQS(ph)K_	2 Phospho (STY)	sp|P11171|41_HUMAN	1		_KPGPPLS(ph)PEIRS(ph)PAGS(ph)PELR_	3 Phospho (STY)	sp|Q96JM3|CHAP1_HUMAN	1		_NEVNGTSEDIKS(ph)EGDTQS(ph)N_	2 Phospho (STY)	sp|O95232|LC7L3_HUMAN	0.999
_DLQEQDADAGS(ph)ER_	Phospho (STY)	sp|Q6P158|DHX57_HUMAN	1		_DRES(ph)RS(ph)PFLKPDER_	Phospho (STY)	sp|Q9H7N4|SFR19_HUMAN	1		_DRICS(ph)DEEEDEEK_	Phospho (STY)	sp|Q9NPG3|UBN1_HUMAN	1		_DTSPDKGELVS(ph)DEEEDT_	2 Oxidation (M),Phospho (STY)	sp|Q9UPU7|TBD2B_HUMAN	1		_DTVIIVS(ph)EPS(ph)EDEESQGLPTM(ox)AR_	Oxidation (M),2 Phospho (STY)	sp|Q9H4L7|SMRCD_HUMAN	0.981		_ENAS(ph)PAPGTTAEEAM(ox)SR_	Oxidation (M),Phospho (STY)	sp|P46379|BAG6_HUMAN	1		_GSGTAS(ph)DDEFENLR_	Phospho (STY)	sp|Q7Z6Z7|HUWE1_HUMAN	0.996		_IEVKEES(ph)PQS(ph)KAETELK_	2 Phospho (STY)	sp|P11171|41_HUMAN	0.996		_KPGPSGPSES(ph)PK_	Phospho (STY)	sp|Q96JM3|CHAP1_HUMAN	0.93		_NEVNGTSEDIKS(ph)EGDTQSN_	Phospho (STY)	sp|O95232|LC7L3_HUMAN	0.999
_DLQS(ph)PDFTTGFHSDK_	Phospho (STY)	sp|Q9P2D0|IBTK_HUMAN	0.999		_DRGLDS(ph)GAET(ph)EEEK_	Oxidation (M),Phospho (STY)	sp|P78559|MAP1A_HUMAN	1		_DRM(ox)GSALMIETARNPT(ph)CPK_	Oxidation (M),Phospho (STY)	sp|Q9NP80|PLPL8_HUMAN	0.996		_DTTVIS(ph)HSPNTSYDTALEAR_	Phospho (STY)	sp|Q4VCS5|AMOT_HUMAN	0.826		_DVDDGS(ph)GSPHS(ph)PHQLSSK_	2 Phospho (STY)	sp|Q9H4A3|WNK1_HUMAN	0.822		_ENES(ph)PDVR_	Phospho (STY)	sp|Q96FV9|THOC1_HUMAN	1		_GSLGS(ph)QGAKDEPEEELQK_	Phospho (STY)	sp|Q13428|TCOF_HUMAN	0.893		_IGEEDS(ph)T(ph)DDEDGLLEEHK_	2 Phospho (STY)	sp|Q8IX21|F178A_HUMAN	1		_KPLS(ph)PVRDNIQLTPEAEEDIFNKPECGR_	Phospho (STY)	sp|Q9UQ84|EXO1_HUMAN	1		_NEVNGTSEDIKSEGDTQS(ph)N_	Phospho (STY)	sp|O95232|LC7L3_HUMAN	0.999
_DLS(ph)LEEIQK_	Phospho (STY)	sp|P16949|STMN1_HUMAN	1		_DRGLDS(ph)GAET(ph)EEEKDTWEEK_	Phospho (STY)	sp|P78559|MAP1A_HUMAN	1		_DRPGS(ph)PESPLLDAPFSR_	Phospho (STY)	sp|Q8TF72|SHRM3_HUMAN	0.929		_DTTVISHS(ph)PNT(ph)SYDTALEAR_	2 Phospho (STY)	sp|Q4VCS5|AMOT_HUMAN	0.892		_DVDDGSGS(ph)PHS(ph)PHQLSSK_	2 Phospho (STY)	sp|Q9H4A3|WNK1_HUMAN	0.994		_ENFS(ph)PER_	Phospho (STY)	sp|Q7Z6E9|RBBP6_HUMAN	1		_GSS(ph)PGPRPVEGTPASR_	Phospho (STY)	sp|Q13112|CAF1B_HUMAN	0.895		_IGEGT(ph)YGVVYK_	Phospho (STY)	sp|P06493|CDK1_HUMAN	0.96		_KPPAPPS(ph)PVQSQS(ph)PSTNWS(ph)PAVPVK_	3 Phospho (STY)	sp|Q8IYB3|SRRM1_HUMAN	0.862		_NFYES(ph)DDDQK_	Phospho (STY)	sp|O00203|AP3B1_HUMAN	1
_DLS(ph)TSPKPS(ph)PIPS(ph)PVLGR_	Phospho (STY)	sp|Q8NDI1|EHBP1_HUMAN	0.842		_DRHDT(ph)PDPS(ph)PR_	Phospho (STY)	sp|Q9BRD0|BUD13_HUMAN	1		_DRPHASGT(ph)DGDES(ph)EEDPPEHKPSK_	2 Phospho (STY)	sp|Q96RS0|TGS1_HUMAN	0.936		_DTTVISHS(ph)PNTSYDTALEAR_	Phospho (STY)	sp|Q4VCS5|AMOT_HUMAN	0.999		_DVDDGSGSPHS(ph)PHQLSSK_	Phospho (STY)	sp|Q9H4A3|WNK1_HUMAN	0.936		_ENIEKDEDDVDQELANIDPTWIES(ph)PK_	Phospho (STY)	sp|P78362|SRPK2_HUMAN	0.986		_GSS(ph)PSHSATSVHTSV_	Phospho (STY)	sp|Q13613|MTMR1_HUMAN	0.828		_IGEGTY(ph)GVVYK_	Phospho (STY)	sp|P06493|CDK1_HUMAN	0.98		_KPPAPPS(ph)PVQSQSPS(ph)TNWSPAVPVK_	2 Phospho (STY)	sp|Q8IYB3|SRRM1_HUMAN	0.936		_NGEADSS(ph)DKEMKHGQK_	Phospho (STY)	sp|Q9C0F0|ASXL3_HUMAN	0.999
_DLT(ph)T(ph)VAVDVVLENGS(ph)QY(ph)R_	Phospho (STY)	sp|Q9UHC1|MLH3_HUMAN	1		_DRICS(ph)DEEEDEEK_	2 Phospho (STY)	sp|Q9NPG3|UBN1_HUMAN	1		_DRPHASGTDGDES(ph)EEDPPEHKPSK_	Phospho (STY)	sp|Q96RS0|TGS1_HUMAN	0.973		_DVATSPISPTENNTT(ph)PPDALTR_	Phospho (STY)	sp|Q13153|PAK1_HUMAN	0.945		_DVEDM(ox)ELS(ph)DVEDDGSK_	Oxidation (M),Phospho (STY)	sp|Q5VT52|RPRD2_HUMAN	1		_ENKFS(ph)NGT(ph)IEEKPALY(ph)K_	3 Phospho (STY)	sp|Q92628|K0232_HUMAN	1		_GSYGS(ph)DAEEEEYR_	Phospho (STY)	sp|Q9UDY2|ZO2_HUMAN	1		_IGELGAPEVWGLS(ph)PK_	Phospho (STY)	sp|Q8N5F7|NKAP_HUMAN	1		_KPPAPPS(ph)PVQSQSPST(ph)NWSPAVPVK_	2 Phospho (STY)	sp|Q8IYB3|SRRM1_HUMAN	0.857		_NGGEDT(ph)DNEEGEEENPLEIK_	Phospho (STY)	sp|Q9NU22|MDN1_HUMAN	1
_DLVLPTQALPAS(ph)PALK_	Phospho (STY)	sp|Q15554|TERF2_HUMAN	1		_DRPPCS(ph)PSR_	Phospho (STY)	sp|O95758|PTBP3_HUMAN	0.989		_DRPPCS(ph)PSR_	Phospho (STY)	sp|O95758|PTBP3_HUMAN	0.972		_DVDASPS(ph)PLSVQDLK_	Phospho (STY)	sp|Q8IWZ8|SUGP1_HUMAN	0.833		_DVEDMELS(ph)DVEDDGSK_	Phospho (STY)	sp|Q5VT52|RPRD2_HUMAN	1		_ENLQPQSSGVQGQVPIS(ph)PEPLQRPEM(ox)LK_	Oxidation (M),Phospho (STY)	sp|Q9H467|CUED2_HUMAN	1		_GTDTQTPAVLS(ph)PSK_	Phospho (STY)	sp|P46087|NOP2_HUMAN	1		_ILLVDS(ph)PGM(ox)GNADDEQQEEGTSSK_	Oxidation (M),Phospho (STY)	sp|Q9UKN8|TF3C4_HUMAN	1		_KPPAPPS(ph)PVQSQSPSTNWSPAVPVK_	Phospho (STY)	sp|Q8IYB3|SRRM1_HUMAN	0.999		_NGSLDS(ph)PGKQDTEEDEEEDEK_	Phospho (STY)	sp|Q9Y266|NUDC_HUMAN	0.989
_DLVQPDKPAS(ph)PK_	Phospho (STY)	sp|Q6PJT7|ZC3HE_HUMAN	1		_DRRPLLTAPDHCS(ph)DDA_	Phospho (STY)	sp|Q9GZR2|REXO4_HUMAN	1		_DRQS(ph)PPPAK_	Phospho (STY)	sp|Q86VM9|ZCH18_HUMAN	1		_DVDDGSGS(ph)PHS(ph)PHQLSSK_	Phospho (STY)	sp|Q9H4A3|WNK1_HUMAN	0.902		_DVNSSS(ph)PVM(ox)LAFK_	Oxidation (M),Phospho (STY)	sp|Q99598|TSNAX_HUMAN	0.806		_ENPDS(ph)DADLDVDGDDTLEYGKPQYTEADVIPCTGEEPGEAK_	Phospho (STY)	sp|Q5VTB9|RN220_HUMAN	0.988		_GTS(ph)PSSSSRPQR_	Phospho (STY)	sp|Q8N1F7|NUP93_HUMAN	0.832		_IPRPSVS(ph)QGCS(ph)R_	2 Phospho (STY)	sp|O75122|CLAP2_HUMAN	0.972		_KPS(ph)DGSPDTKPSR_	Phospho (STY)	sp|Q92733|PRCC_HUMAN	0.98		_NGSLDS(ph)PGKQDTEEDEEEDEKDK_	Phospho (STY)	sp|Q9Y266|NUDC_HUMAN	0.966
_DM(ox)DEPS(ph)PVPNVEEVTLPK_	Oxidation (M),Phospho (STY)	sp|Q8TAQ2|SMRC2_HUMAN	1		_DRS(ph)PHRS(ph)SPSDTRPK_	Phospho (STY)	sp|Q8IWS0|PHF6_HUMAN	0.951		_DRRPLLTAPDHCS(ph)DDA_	Phospho (STY)	sp|Q9GZR2|REXO4_HUMAN	1		_DVEDM(ox)ELS(ph)DVEDDGSK_	Phospho (STY)	sp|Q5VT52|RPRD2_HUMAN	1		_DVPPDILLDS(ph)PERK_	Phospho (STY)	sp|Q6KC79|NIPBL_HUMAN	1		_ENS(ph)FGSPLEFR_	Phospho (STY)	sp|Q9UQ35|SRRM2_HUMAN	0.981		_GVEPSPS(ph)PIKPGDIK_	Phospho (STY)	sp|Q92890|UFD1_HUMAN	1		_IQQFDDGGS(ph)DEEDIWEEK_	Phospho (STY)	sp|Q5H9R7|PP6R3_HUMAN	1		_KPSDGS(ph)PDTKPSR_	Phospho (STY)	sp|Q92733|PRCC_HUMAN	0.948		_NGSLDSPGKQDT(ph)EEDEEEDEKDK_	Phospho (STY)	sp|Q9Y266|NUDC_HUMAN	0.9
_DM(ox)ES(ph)PTKLDVTLAK_	2 Phospho (STY)	sp|P27816|MAP4_HUMAN	0.999		_DRS(ph)PIRGS(ph)PR_	Phospho (STY)	sp|Q9HCD5|NCOA5_HUMAN	1		_DRS(ph)PHRS(ph)SPSDTRPK_	2 Phospho (STY)	sp|Q8IWS0|PHF6_HUMAN	0.922		_DVEDMELS(ph)DVEDDGSK_	Phospho (STY)	sp|Q5VT52|RPRD2_HUMAN	1		_DVT(ph)PPPETEVVLIK_	Phospho (STY)	sp|P27816|MAP4_HUMAN	1		_ENSFGS(ph)PLEFR_	Phospho (STY)	sp|Q9UQ35|SRRM2_HUMAN	1		_GVGIS(ph)VLEM(ox)SHRSSDFAK_	Oxidation (M),Phospho (STY)	sp|Q9Y617|SERC_HUMAN	1		_IS(ph)DS(ph)ESEDPPR_	2 Phospho (STY)	sp|Q96ST2|IWS1_HUMAN	1		_KPSPAQAAET(ph)PALELPLPSVPAPAPL_	Phospho (STY)	sp|Q8WX92|NELFB_HUMAN	0.999		_NHKPS(ph)RS(ph)FS(ph)R_	3 Phospho (STY)	sp|P84103|SRSF3_HUMAN	1
_DM(ox)PGGFLFEGLS(ph)DDEDDFHPNTR_	Phospho (STY)	sp|Q96S82|UBL7_HUMAN	1		_DRS(ph)PSRLDTFLK_	Oxidation (M),Phospho (STY)	sp|Q66GS9|CP135_HUMAN	0.954		_DRS(ph)PHRSS(ph)PSDTRPK_	2 Phospho (STY)	sp|Q8IWS0|PHF6_HUMAN	0.941		_DVLS(ph)PLRPSR_	Phospho (STY)	sp|Q12756|KIF1A_HUMAN	1		_DVTLS(ph)PVK_	Phospho (STY)	sp|Q8NFC6|BD1L1_HUMAN	0.99		_ENSGPVENGVS(ph)DQEGEEQAREPELPCGLAPAVSR_	Phospho (STY)	sp|Q8TEQ6|GEMI5_HUMAN	1		_GVHIHQAGGS(ph)PPASSTSSSSLTNDVAK_	Phospho (STY)	sp|Q8N122|RPTOR_HUMAN	1		_ISYIPDEEVS(ph)SPS(ph)PPQR_	2 Phospho (STY)	sp|Q9Y6M1|IF2B2_HUMAN	0.846		_KPVTVSPTTPTS(ph)PTEGEAS_	Phospho (STY)	sp|Q9Y6G9|DC1L1_HUMAN	0.966		_NHLS(ph)PQQGGATPQVPS(ph)PCCR_	2 Phospho (STY)	sp|Q9H4L4|SENP3_HUMAN	0.999
_DMEAVVPYS(ph)YAATDLQVGGR_	Phospho (STY)	sp|O00634|NET3_HUMAN	0.818		_DRT(ph)PPHLLYSDR_	Phospho (STY)	sp|Q8NDT2|RB15B_HUMAN	1		_DRS(ph)PIRGS(ph)PR_	2 Phospho (STY)	sp|Q9HCD5|NCOA5_HUMAN	1		_DVLSSNEAT(ph)MQS(ph)MES(ph)LLR_	2 Phospho (STY)	sp|Q5VU43|MYOME_HUMAN	1		_DVTNFTVGGFAPM(ox)S(ph)PR_	Oxidation (M),Phospho (STY)	sp|O00267|SPT5H_HUMAN	1		_ENVEYIEREES(ph)DGEYDEFGR_	Phospho (STY)	sp|O95218|ZRAB2_HUMAN	1		_GVPAGNS(ph)DTEGGQPGRK_	Phospho (STY)	sp|Q9UKV3|ACINU_HUMAN	0.998		_ISYIPDEEVSS(ph)PS(ph)PPQR_	2 Phospho (STY)	sp|Q9Y6M1|IF2B2_HUMAN	0.909		_KPYRIES(ph)DEEEDFENVGK_	Phospho (STY)	sp|Q96T23|RSF1_HUMAN	0.999		_NHLSPQQGGAT(ph)PQVPS(ph)PCCR_	2 Phospho (STY)	sp|Q9H4L4|SENP3_HUMAN	0.856
_DNDS(ph)ESDYM(ox)FM(ox)APGAGAIPK_	Phospho (STY)	sp|O14654|IRS4_HUMAN	0.998		_DRT(ph)PPHLLYSDRDR_	Phospho (STY)	sp|Q8NDT2|RB15B_HUMAN	1		_DRSS(ph)PPPGYIPDELHQVAR_	Phospho (STY)	sp|Q9Y2U5|M3K2_HUMAN	0.875		_DVNSSS(ph)PVMLAFK_	Phospho (STY)	sp|Q99598|TSNAX_HUMAN	0.809		_DVYLS(ph)PR_	Phospho (STY)	sp|P38159|RBMX_HUMAN	1		_ENVEYIEREES(ph)DGEYDEFGRK_	Phospho (STY)	sp|O95218|ZRAB2_HUMAN	1		_GYTS(ph)DSEVYTDHGRPGK_	Phospho (STY)	sp|Q92538|GBF1_HUMAN	0.961		_IVEPEVVGES(ph)DS(ph)EVEGDAWR_	2 Phospho (STY)	sp|P55081|MFAP1_HUMAN	1		_KQDAPSQS(ph)ENK_	Phospho (STY)	sp|Q15003|CND2_HUMAN	0.879		_NHS(ph)GS(ph)RT(ph)PPVALNSSR_	3 Phospho (STY)	sp|Q9UQ35|SRRM2_HUMAN	1
_DNEEREQSSDLTPSGDVS(ph)PVKPLSR_	Phospho (STY)	sp|Q8WYQ5|DGCR8_HUMAN	1		_DRT(ph)PPLLYR_	Phospho (STY)	sp|Q96T37|RBM15_HUMAN	1		_DRT(ph)PPHLLYSDR_	Phospho (STY)	sp|Q8NDT2|RB15B_HUMAN	1		_DVPPDILLDS(ph)PERK_	Phospho (STY)	sp|Q6KC79|NIPBL_HUMAN	1		_DVYLS(ph)PRDDGYSTK_	Phospho (STY)	sp|P38159|RBMX_HUMAN	1		_EPAITS(ph)QNSPEAR_	Phospho (STY)	sp|P23193|TCEA1_HUMAN	0.876		_HAS(ph)APSHVQPSDSEK_	Phospho (STY)	sp|O60343|TBCD4_HUMAN	1		_IVEPEVVGES(ph)DSEVEGDAWR_	Phospho (STY)	sp|P55081|MFAP1_HUMAN	0.889		_KQDDS(ph)PPRPIIGPALPPGFIK_	Phospho (STY)	sp|Q8IXQ4|GPAM1_HUMAN	1		_NKLEGDS(ph)DVDS(ph)ELEDRVDGVK_	2 Phospho (STY)	sp|Q92614|MY18A_HUMAN	1
_DNEESEQPPVPGT(ph)PTLR_	Phospho (STY)	sp|O15439|MRP4_HUMAN	0.982		_DRVLDDVSIRS(ph)PETK_	Phospho (STY)	sp|Q12830|BPTF_HUMAN	0.996		_DRT(ph)PPHLLYSDRDR_	Phospho (STY)	sp|Q8NDT2|RB15B_HUMAN	1		_DVT(ph)PPPETEVVLIK_	Phospho (STY)	sp|P27816|MAP4_HUMAN	1		_DYDDM(ox)S(ph)PR_	Oxidation (M),Phospho (STY)	sp|P61978|HNRPK_HUMAN	1		_EPAITSQNS(ph)PEAR_	Phospho (STY)	sp|P23193|TCEA1_HUMAN	0.999		_HASSSPES(ph)PKPAPAPGSHR_	Phospho (STY)	sp|Q9UQ35|SRRM2_HUMAN	0.998		_IYHLPDAES(ph)DEDEDFK_	Phospho (STY)	sp|Q15019|SEPT2_HUMAN	1		_KQQQEPTGEPS(ph)PK_	Phospho (STY)	sp|P52926|HMGA2_HUMAN	1		_NKPGPNIES(ph)GNEDDDASFK_	Phospho (STY)	sp|O60841|IF2P_HUMAN	1
_DNPS(ph)PEPQLDDIKR_	Oxidation (M),Phospho (STY)	sp|Q96JC9|EAF1_HUMAN	1		_DRWS(ph)DNQSSGK_	Phospho (STY)	sp|Q9NRR4|RNC_HUMAN	0.999		_DRVLDDVSIRS(ph)PETK_	Phospho (STY)	sp|Q12830|BPTF_HUMAN	0.998		_DVTLS(ph)PVK_	Phospho (STY)	sp|Q8NFC6|BD1L1_HUMAN	0.928		_DYDDMS(ph)PR_	Phospho (STY)	sp|P61978|HNRPK_HUMAN	1		_EPHS(ph)PADQPEQQAESTLTSAETR_	Phospho (STY)	sp|Q9H2Y7|ZN106_HUMAN	1		_HCAPS(ph)PDRS(ph)PELSSSR_	2 Phospho (STY)	sp|Q96T37|RBM15_HUMAN	1		_IYHLPDAES(ph)DEDEDFKEQTR_	Phospho (STY)	sp|Q15019|SEPT2_HUMAN	0.999		_KQS(ph)LGELIGTLNAAK_	Phospho (STY)	sp|P60174|TPIS_HUMAN	1		_NPEDKS(ph)PQLSLS(ph)PRPAS(ph)PK_	3 Phospho (STY)	sp|O95785|WIZ_HUMAN	0.926
_DNQESS(ph)DAELS(ph)SSEYIK_	Phospho (STY)	sp|Q96JM3|CHAP1_HUMAN	0.922		_DS(ph)GRLSPDLSVCGQPR_	Phospho (STY)	sp|Q8TF76|HASP_HUMAN	0.933		_DS(ph)PDSPEPPNKKPLVEM(ox)DETPQVEK_	Oxidation (M),Phospho (STY)	sp|Q9NVM9|ASUN_HUMAN	0.862		_DVTNFTVGGFAPM(ox)S(ph)PR_	Phospho (STY)	sp|O00267|SPT5H_HUMAN	1		_DYDEEEQGYDS(ph)EKEK_	Phospho (STY)	sp|Q05519|SRS11_HUMAN	1		_EPTPS(ph)IASDISLPIATQELR_	Phospho (STY)	sp|A0FGR8|ESYT2_HUMAN	0.99		_HCAPS(ph)PDRSPELS(ph)SSR_	2 Phospho (STY)	sp|Q96T37|RBM15_HUMAN	0.831		_IYQY(ph)IQSR_	Phospho (STY)	sp|Q9Y463|DYR1B_HUMAN	1		_KQSFDDNDS(ph)EELEDK_	Phospho (STY)	sp|O60841|IF2P_HUMAN	1		_NPEPDS(ph)DEHT(ph)PVEDEEPKK_	2 Phospho (STY)	sp|Q8N5F7|NKAP_HUMAN	1
_DNS(ph)PLREK_	Phospho (STY)	sp|Q5VUA4|ZN318_HUMAN	1		_DSAIPVES(ph)DT(ph)DDEGAPR_	Phospho (STY)	sp|Q96D46|NMD3_HUMAN	1		_DSAIPVES(ph)DT(ph)DDEGAPR_	2 Phospho (STY)	sp|Q96D46|NMD3_HUMAN	1		_DVTNFTVGGFAPMS(ph)PR_	Phospho (STY)	sp|O00267|SPT5H_HUMAN	1		_DYEIESQNPLAS(ph)PTNTLLGSAK_	Phospho (STY)	sp|Q7Z417|NUFP2_HUMAN	0.87		_EPVADEEEEDS(ph)DDDVEPITEFR_	Phospho (STY)	sp|P54105|ICLN_HUMAN	1		_HDS(ph)PDLAPNVTYSLPR_	Phospho (STY)	sp|Q9BRD0|BUD13_HUMAN	1		_KAAS(ph)PS(ph)PQS(ph)VR_	3 Phospho (STY)	sp|Q8IYB3|SRRM1_HUMAN	1		_KQSFDDNDS(ph)EELEDKDSK_	Phospho (STY)	sp|O60841|IF2P_HUMAN	1		_NQAS(ph)DS(ph)ENEELPKPR_	2 Phospho (STY)	sp|Q96ST2|IWS1_HUMAN	1
_DNS(ph)PPPAFKPEPPK_	Phospho (STY)	sp|Q9UDY2|ZO2_HUMAN	1		_DSAIPVES(ph)DTDDEGAPR_	Phospho (STY)	sp|Q96D46|NMD3_HUMAN	0.99		_DSAIPVES(ph)DTDDEGAPR_	Phospho (STY)	sp|Q96D46|NMD3_HUMAN	0.987		_DVYLS(ph)PR_	Phospho (STY)	sp|P38159|RBMX_HUMAN	1		_DYGHS(ph)SSRDDYPSR_	Phospho (STY)	sp|P38159|RBMX_HUMAN	0.957		_EPVNLEGDDTS(ph)LIHGK_	Phospho (STY)	sp|Q9H2J7|S6A15_HUMAN	0.973		_HDS(ph)PDPS(ph)PPR_	2 Phospho (STY)	sp|Q9BRD0|BUD13_HUMAN	1		_KAAS(ph)PS(ph)PQSVR_	2 Phospho (STY)	sp|Q8IYB3|SRRM1_HUMAN	1		_KQY(ph)SKGVSQMPLR_	Phospho (STY)	sp|P31939|PUR9_HUMAN	1		_NS(ph)PEDLGLSLTGDSCK_	Phospho (STY)	sp|Q12888|TP53B_HUMAN	1
_DNT(ph)FFRESPVGR_	Phospho (STY)	sp|Q8NEY8|PPHLN_HUMAN	0.948		_DSAIPVESDT(ph)DDEGAPR_	Phospho (STY)	sp|Q96D46|NMD3_HUMAN	1		_DSAIPVESDT(ph)DDEGAPR_	Phospho (STY)	sp|Q96D46|NMD3_HUMAN	0.978		_DVYLS(ph)PRDDGYSTK_	Phospho (STY)	sp|P38159|RBMX_HUMAN	1		_DYS(ph)PSRNPPEVEAR_	Phospho (STY)	sp|Q9HCM7|FBSL_HUMAN	0.835		_EQDLPLAEAVRPKT(ph)PPVVIK_	Phospho (STY)	sp|Q96A49|SYAP1_HUMAN	1		_HDS(ph)PEDVK_	Phospho (STY)	sp|P31948|STIP1_HUMAN	1		_KAAS(ph)PS(ph)PQSVRR_	2 Phospho (STY)	sp|Q8IYB3|SRRM1_HUMAN	0.821		_KRES(ph)ES(ph)ESDETPPAAPQLIK_	2 Phospho (STY)	sp|O60832|DKC1_HUMAN	0.965		_NS(ph)PGSQVASNPR_	Phospho (STY)	sp|Q9H0D6|XRN2_HUMAN	0.999
_DNTFFRES(ph)PVGR_	2 Phospho (STY)	sp|Q8NEY8|PPHLN_HUMAN	1		_DSALAEAPEGLS(ph)PAPPAR_	2 Phospho (STY)	sp|Q9H9J4|UBP42_HUMAN	1		_DSALAEAPEGLS(ph)PAPPAR_	Phospho (STY)	sp|Q9H9J4|UBP42_HUMAN	1		_DYDDM(ox)S(ph)PR_	Phospho (STY)	sp|P61978|HNRPK_HUMAN	1		_DYS(ph)YER_	Phospho (STY)	sp|P48634|PRC2A_HUMAN	1		_EQDRVHS(ph)PCPTSGSEK_	Phospho (STY)	sp|Q96LT9|RBM40_HUMAN	1		_HDT(ph)PDPS(ph)PLR_	2 Phospho (STY)	sp|Q9BRD0|BUD13_HUMAN	1		_KADTTTPTPTAILAPGS(ph)PAS(ph)PPGSLEPK_	2 Phospho (STY)	sp|P25440|BRD2_HUMAN	0.96		_KS(ph)PVGKS(ph)PPSTGSTYGSSQK_	2 Phospho (STY)	sp|Q9Y2W1|TR150_HUMAN	0.996		_NS(ph)PLDCGSAS(ph)PNK_	2 Phospho (STY)	sp|O75179|ANR17_HUMAN	0.896
_DNTRPGANS(ph)PEM(ox)WSEAIK_	Phospho (STY)	sp|Q92499|DDX1_HUMAN	0.996		_DSAYQSITHYRPVS(ph)ASR_	Phospho (STY)	sp|P50402|EMD_HUMAN	0.876		_DSDQVAQS(ph)DGEES(ph)PAAEEQLLGEHIK_	2 Phospho (STY)	sp|O94979|SC31A_HUMAN	0.999		_DYDDMS(ph)PR_	Phospho (STY)	sp|P61978|HNRPK_HUMAN	1		_DYTGCSTSESLS(ph)PVK_	Phospho (STY)	sp|O95297|MPZL1_HUMAN	1		_EQM(ox)S(ph)EAEVGVFVQR_	Oxidation (M),Phospho (STY)	sp|Q86YB7|ECHD2_HUMAN	1		_HELS(ph)PPQK_	Phospho (STY)	sp|Q9BXP5|SRRT_HUMAN	1		_KAEDS(ph)DS(ph)EPEPEDNVR_	2 Phospho (STY)	sp|Q9H0D6|XRN2_HUMAN	1		_KSEAGHASS(ph)PDSEVTSLCQK_	Phospho (STY)	sp|Q6NZY4|ZCHC8_HUMAN	0.982		_NS(ph)WGEEWGMGGY(ph)VKM(ox)AK_	Oxidation (M),2 Phospho (STY)	sp|P07711|CATL1_HUMAN	1
_DPAQPM(ox)S(ph)PGEATQSGARPADR_	Phospho (STY)	sp|Q9BQG0|MBB1A_HUMAN	1		_DSDQVAQS(ph)DGEESPAAEEQLLGEHIK_	Phospho (STY)	sp|O94979|SC31A_HUMAN	0.995		_DSDQVAQS(ph)DGEESPAAEEQLLGEHIK_	Phospho (STY)	sp|O94979|SC31A_HUMAN	1		_DYDEEEQGYDS(ph)EKEK_	Phospho (STY)	sp|Q05519|SRS11_HUMAN	1		_EAAEPLSEPKEDQEAAELLS(ph)EPEEESER_	Phospho (STY)	sp|Q63HN8|RN213_HUMAN	0.997		_EQS(ph)EVSVSPR_	Phospho (STY)	sp|Q7L4I2|RSRC2_HUMAN	1		_HGAGS(ph)GCLGTM(ox)EVK_	Oxidation (M),Phospho (STY)	sp|Q9BYG5|PAR6B_HUMAN	1		_KAEGEPQEES(ph)PLK_	Phospho (STY)	sp|Q9NYF8|BCLF1_HUMAN	1		_KSPVGKS(ph)PPSTGSTYGSSQK_	Phospho (STY)	sp|Q9Y2W1|TR150_HUMAN	1		_NSADDEELT(ph)NDS(ph)LTLSQSK_	2 Phospho (STY)	sp|O94880|PHF14_HUMAN	0.994
_DPS(ph)GLDKK_	Phospho (STY)	sp|Q9NQW6|ANLN_HUMAN	1		_DSDQVAQS(ph)DGEESPAAEEQLLGEHIKEEK_	Phospho (STY)	sp|O94979|SC31A_HUMAN	0.903		_DSDQVAQS(ph)DGEESPAAEEQLLGEHIKEEK_	Phospho (STY)	sp|O94979|SC31A_HUMAN	1		_DYEIESQNPLAS(ph)PTNTLLGSAK_	Phospho (STY)	sp|Q7Z417|NUFP2_HUMAN	0.923		_EAAGPAPS(ph)PM(ox)R_	Oxidation (M),Phospho (STY)	sp|Q12834|CDC20_HUMAN	1		_EQYVPPRS(ph)PK_	Phospho (STY)	sp|Q71RC2|LARP4_HUMAN	1		_HGGSPQPLATTPLSQEPVNPPSEAS(ph)PTR_	Phospho (STY)	sp|Q9UQ35|SRRM2_HUMAN	0.812		_KAENAEGQTPAIGPDGEPLDET(ph)S(ph)QM(ox)SDLPVK_	Oxidation (M),2 Phospho (STY)	sp|P51532|SMCA4_HUMAN	0.836		_KSS(ph)PEMEDAR_	Phospho (STY)	sp|Q96T58|MINT_HUMAN	0.994		_NSS(ph)PAPPQPAPGK_	Phospho (STY)	sp|Q9NYV4|CDK12_HUMAN	0.972
_DPSSGQEVAT(ph)PPVPQLQVCEPK_	Phospho (STY)	sp|Q9UKV3|ACINU_HUMAN	0.995		_DSENLAS(ph)PSEYPENGER_	Phospho (STY)	sp|P52948|NUP98_HUMAN	1		_DSENLAS(ph)PSEYPENGER_	Phospho (STY)	sp|P52948|NUP98_HUMAN	1		_DYLLS(ph)ESEDEGDNDGERK_	Phospho (STY)	sp|Q9BVJ6|UT14A_HUMAN	0.998		_EAALPPVS(ph)PLK_	Phospho (STY)	sp|Q04637|IF4G1_HUMAN	1		_ERDHS(ph)PTPS(ph)VFNSDEERYR_	2 Phospho (STY)	sp|Q6UN15|FIP1_HUMAN	0.964		_HGLAHDEM(ox)KS(ph)PR_	Oxidation (M),Phospho (STY)	sp|Q9Y2W1|TR150_HUMAN	1		_KAENAEGQTPAIGPDGEPLDETS(ph)QM(ox)S(ph)DLPVK_	Oxidation (M),2 Phospho (STY)	sp|P51532|SMCA4_HUMAN	0.837		_KTPLALAGS(ph)PTPK_	Phospho (STY)	sp|O95785|WIZ_HUMAN	0.916		_NSSLGS(ph)PSNLCGS(ph)PPGSIR_	2 Phospho (STY)	sp|Q9C0B0|UNK_HUMAN	0.861
_DQDLAS(ph)CDRDRSSR_	Oxidation (M),Phospho (STY)	sp|Q9Y383|LC7L2_HUMAN	0.882		_DSFDDRGPSLNPVLDYDHGS(ph)R_	Phospho (STY)	sp|P43243|MATR3_HUMAN	0.996		_DSGRGDS(ph)VSDSGSDALR_	Phospho (STY)	sp|Q53EL6|PDCD4_HUMAN	0.994		_DYTGCSTSESLS(ph)PVK_	Phospho (STY)	sp|O95297|MPZL1_HUMAN	0.998		_EAANEAGDS(ph)SQDEAEDDVK_	Phospho (STY)	sp|Q9NVU0|RPC5_HUMAN	0.891		_ERDHS(ph)PTPSVFNS(ph)DEERYR_	2 Phospho (STY)	sp|Q6UN15|FIP1_HUMAN	0.97		_HGLLLPAS(ph)PVR_	Phospho (STY)	sp|Q96E09|F122A_HUMAN	1		_KAEPSEVDM(ox)NS(ph)PK_	Oxidation (M),Phospho (STY)	sp|Q9NR30|DDX21_HUMAN	1		_KTS(ph)PASLDFPESQK_	Phospho (STY)	sp|Q96JM3|CHAP1_HUMAN	1		_NSSS(ph)PVS(ph)PASVPGQR_	2 Phospho (STY)	sp|Q9H1B7|I2BPL_HUMAN	0.987
_DQEPKPS(ph)PEPAAVSR_	Phospho (STY)	sp|Q9H7S9|ZN703_HUMAN	1		_DSGRGDS(ph)VSDSGSDALR_	2 Phospho (STY)	sp|Q53EL6|PDCD4_HUMAN	0.831		_DSGRGDSVS(ph)DSGSDALR_	Phospho (STY)	sp|Q53EL6|PDCD4_HUMAN	0.964		_EAAEPLSEPKEDQEAAELLS(ph)EPEEESER_	Phospho (STY)	sp|Q63HN8|RN213_HUMAN	0.998		_EAARS(ph)PDKPGGS(ph)PSASR_	2 Phospho (STY)	sp|Q9Y3T9|NOC2L_HUMAN	0.921		_ERDHS(ph)PTPSVFNSDEER_	Phospho (STY)	sp|Q6UN15|FIP1_HUMAN	0.914		_HGLQLGAQS(ph)PGR_	Phospho (STY)	sp|Q8N1G0|ZN687_HUMAN	1		_KALY(ph)GT(ph)TS(ph)ETAT(ph)WRR_	4 Phospho (STY)	sp|P08473|NEP_HUMAN	0.87		_KTSFDQDS(ph)DVDIFPSDFPTEPPSLPR_	Phospho (STY)	sp|Q02880|TOP2B_HUMAN	0.891		_NSSTDQGS(ph)DEEGSLQK_	Phospho (STY)	sp|Q12789|TF3C1_HUMAN	1
_DQKKVM(ox)VM(ox)T(ph)S(ph)S(ph)EHTETK_	Phospho (STY)	sp|A4UGR9|XIRP2_HUMAN	0.998		_DSGSDQDLDGAGVRAS(ph)DLEDEESAAR_	Phospho (STY)	sp|Q86VM9|ZCH18_HUMAN	1		_DSGSDQDLDGAGVRAS(ph)DLEDEESAAR_	Phospho (STY)	sp|Q86VM9|ZCH18_HUMAN	1		_EAALPPVS(ph)PLK_	Phospho (STY)	sp|Q04637|IF4G1_HUMAN	1		_EAARS(ph)PDKPGGSPSASR_	Phospho (STY)	sp|Q9Y3T9|NOC2L_HUMAN	1		_ERDKEVS(ph)DDEAEEK_	Phospho (STY)	sp|P07900|HS90A_HUMAN	1		_HGS(ph)FHEDEDPIGS(ph)PR_	2 Phospho (STY)	sp|Q96T58|MINT_HUMAN	1		_KAPSAS(ph)DS(ph)DSKADS(ph)DGAKPEPVAM(ox)AR_	Oxidation (M),3 Phospho (STY)	sp|Q7Z4V5|HDGR2_HUMAN	0.82		_KTSTS(ph)PPPEK_	Phospho (STY)	sp|Q9H1E3|NUCKS_HUMAN	0.953		_NT(ph)PSQHSHSIQHS(ph)PER_	2 Phospho (STY)	sp|Q9NYF8|BCLF1_HUMAN	0.823
_DQMRANVINEIMST(ph)ER_	Phospho (STY)	sp|O43307|ARHG9_HUMAN	0.84		_DSISAVSSEKVS(ph)PSK_	Phospho (STY)	sp|P46821|MAP1B_HUMAN	0.999		_DSGSDTASAIIPSTTPSVDS(ph)DDESVVK_	Phospho (STY)	sp|Q6WKZ4|RFIP1_HUMAN	0.904		_EAARS(ph)PDKPGGS(ph)PSASR_	2 Phospho (STY)	sp|Q9Y3T9|NOC2L_HUMAN	0.953		_EAASS(ph)PAGEPLRK_	Phospho (STY)	sp|Q96EB6|SIR1_HUMAN	0.827		_ERDQRPSS(ph)PIR_	Phospho (STY)	sp|Q5T200|ZC3HD_HUMAN	0.951		_HGS(ph)FHEDEDPIGSPR_	Phospho (STY)	sp|Q96T58|MINT_HUMAN	1		_KDCIDKNST(ph)LVK_	Phospho (STY)	sp|Q2HXU8|CL12B_HUMAN	0.846		_KVEEDLKADEPS(ph)S(ph)EESDLEIDK_	2 Phospho (STY)	sp|P50502|F10A1_HUMAN	0.887		_NVPQEESLEDS(ph)DVDADFK_	Phospho (STY)	sp|O00505|IMA4_HUMAN	1
_DQQPS(ph)GS(ph)EGEDDDAEAALKK_	Phospho (STY)	sp|Q9NXG2|THUM1_HUMAN	1		_DSKPIALKEEIVT(ph)PK_	Phospho (STY)	sp|Q9NYV4|CDK12_HUMAN	1		_DSISAVSSEKVS(ph)PSK_	Phospho (STY)	sp|P46821|MAP1B_HUMAN	0.994		_EAARS(ph)PDKPGGSPSASR_	2 Phospho (STY)	sp|Q9Y3T9|NOC2L_HUMAN	1		_EAASSSSGTQPAPPAPAS(ph)PWDSK_	Phospho (STY)	sp|Q9H7N4|SFR19_HUMAN	0.908		_EREDS(ph)GDAEAHAFK_	Phospho (STY)	sp|Q9NPI1|BRD7_HUMAN	1		_HGS(ph)GPPSSGGGLYR_	Phospho (STY)	sp|Q9HC52|CBX8_HUMAN	1		_KDDS(ph)DDDGGGWITPSNIK_	Phospho (STY)	sp|Q9ULX3|NOB1_HUMAN	1		_KVEEEGS(ph)PGDPDHEASTQGR_	Phospho (STY)	sp|Q9NZT2|OGFR_HUMAN	1		_NVS(ph)ES(ph)PNRK_	2 Phospho (STY)	sp|Q13427|PPIG_HUMAN	1
_DQS(ph)PFSK_	Phospho (STY)	sp|Q13427|PPIG_HUMAN	0.982		_DSLIT(ph)PHVS(ph)R_	Phospho (STY)	sp|P49792|RBP2_HUMAN	1		_DSLIT(ph)PHVS(ph)R_	2 Phospho (STY)	sp|P49792|RBP2_HUMAN	1		_EAASS(ph)PAGEPLRK_	Phospho (STY)	sp|Q96EB6|SIR1_HUMAN	0.919		_EAASSSSGTQPAPPAPAS(ph)PWDSKK_	Phospho (STY)	sp|Q9H7N4|SFR19_HUMAN	0.997		_EREDSGDAEAHAFKS(ph)PSK_	Phospho (STY)	sp|Q9NPI1|BRD7_HUMAN	0.968		_HGSFHEDEDPIGS(ph)PR_	Phospho (STY)	sp|Q96T58|MINT_HUMAN	1		_KDSNELS(ph)DS(ph)AGEEDSADLK_	2 Phospho (STY)	sp|Q9Y6X9|MORC2_HUMAN	1		_KVEEEQEADEEDVS(ph)EEEAESK_	Phospho (STY)	sp|Q9H3N1|TMX1_HUMAN	1		_NYQQNYQNS(ph)ESGEK_	Phospho (STY)	sp|P67809|YBOX1_HUMAN	1
_DRCPLPCIPTLIGT(ph)PVK_	Phospho (STY)	sp|Q9H0H5|RGAP1_HUMAN	0.998		_DSLIT(ph)PHVSR_	Phospho (STY)	sp|P49792|RBP2_HUMAN	0.994		_DSLITPHVS(ph)R_	Phospho (STY)	sp|P49792|RBP2_HUMAN	0.985		_EAASSSSGTQPAPPAPAS(ph)PWDSK_	2 Phospho (STY)	sp|Q9H7N4|SFR19_HUMAN	0.998		_EADDDEEVDDNIPEM(ox)PS(ph)PK_	Oxidation (M),Phospho (STY)	sp|P26358|DNMT1_HUMAN	1		_EREES(ph)EDELEEANGNNPIDIEVDQNK_	Phospho (STY)	sp|Q9UKL0|RCOR1_HUMAN	1		_HGSYEDAVHS(ph)GALND_	Phospho (STY)	sp|P17987|TCPA_HUMAN	1		_KES(ph)KEEET(ph)S(ph)IDVAGKPNEVTK_	3 Phospho (STY)	sp|P53985|MOT1_HUMAN	1		_KVELS(ph)ES(ph)EEDK_	2 Phospho (STY)	sp|Q8IYB3|SRRM1_HUMAN	1		_QAREES(ph)EES(ph)EAEPVQR_	2 Phospho (STY)	sp|Q9BW71|HIRP3_HUMAN	1
_DREPHGYS(ph)PER_	2 Phospho (STY)	sp|Q9HCM7|FBSL_HUMAN	0.872		_DSLITPHVS(ph)R_	Phospho (STY)	sp|P49792|RBP2_HUMAN	0.984		_DSLS(ph)PVLHPSDLILTR_	Phospho (STY)	sp|Q9HCN4|GPN1_HUMAN	0.952		_EAASSSSGTQPAPPAPAS(ph)PWDSKK_	Phospho (STY)	sp|Q9H7N4|SFR19_HUMAN	0.984		_EADDDEEVDDNIPEM(ox)PS(ph)PKK_	Oxidation (M),Phospho (STY)	sp|P26358|DNMT1_HUMAN	1		_ERFS(ph)PPRHELS(ph)PPQK_	2 Phospho (STY)	sp|Q9BXP5|SRRT_HUMAN	1		_HHQEEDAGPTQPS(ph)PAKPQLK_	Phospho (STY)	sp|Q9C086|IN80B_HUMAN	1		_KET(ph)ES(ph)EAEDNLDDLEK_	2 Phospho (STY)	sp|Q8IYB3|SRRM1_HUMAN	1		_KVELS(ph)ES(ph)EEDKGGK_	2 Phospho (STY)	sp|Q8IYB3|SRRM1_HUMAN	1		_QEEIDES(ph)DDDLDDKPS(ph)PIKK_	2 Phospho (STY)	sp|Q9ULH1|ASAP1_HUMAN	1
_DRGLDS(ph)GAET(ph)EEEKDTWEEK_	Phospho (STY)	sp|P78559|MAP1A_HUMAN	1		_DSLS(ph)DDGVDLK_	Phospho (STY)	sp|P07948|LYN_HUMAN	0.987		_DSNAPKS(ph)PLTGYVR_	Phospho (STY)	sp|Q9NP66|HM20A_HUMAN	0.993		_EAASSSSGTQPAPPAPASPWDS(ph)KK_	Phospho (STY)	sp|Q9H7N4|SFR19_HUMAN	0.917		_EADDDEEVDDNIPEMPS(ph)PK_	Phospho (STY)	sp|P26358|DNMT1_HUMAN	1		_ERPISLGIFPLPAGDGLLT(ph)PDAQK_	Phospho (STY)	sp|O60271|JIP4_HUMAN	1		_HIKEEPLS(ph)EEEPCTSTAIAS(ph)PEK_	2 Phospho (STY)	sp|Q9Y2X3|NOP58_HUMAN	0.999		_KETES(ph)EAEDNLDDLEK_	Phospho (STY)	sp|Q8IYB3|SRRM1_HUMAN	1		_KVELS(ph)ESEEDK_	Phospho (STY)	sp|Q8IYB3|SRRM1_HUMAN	0.996		_QES(ph)DPEDDDVK_	Phospho (STY)	sp|Q9H307|PININ_HUMAN	1
_DRHDT(ph)PDPS(ph)PR_	Phospho (STY)	sp|Q9BRD0|BUD13_HUMAN	1		_DSLS(ph)PVLHPSDLILTR_	Phospho (STY)	sp|Q9HCN4|GPN1_HUMAN	0.826		_DSPDS(ph)PEPPNK_	Phospho (STY)	sp|Q9NVM9|ASUN_HUMAN	1		_EADDDEEVDDNIPEM(ox)PS(ph)PKK_	Phospho (STY)	sp|P26358|DNMT1_HUMAN	1		_EADDDEEVDDNIPEMPS(ph)PKK_	Phospho (STY)	sp|P26358|DNMT1_HUMAN	1		_ERRT(ph)PS(ph)DDEEDNLFAPPK_	2 Phospho (STY)	sp|Q641Q2|FA21A_HUMAN	1		_HIKEEPLS(ph)EEEPCTSTAIAS(ph)PEKK_	2 Phospho (STY)	sp|Q9Y2X3|NOP58_HUMAN	0.895		_KFDHES(ph)SPGT(ph)DEDK_	2 Phospho (STY)	sp|Q13427|PPIG_HUMAN	0.933		_KVVDYSQFQES(ph)DDADEDYGR_	Phospho (STY)	sp|Q9H1E3|NUCKS_HUMAN	1		_QGPPCS(ph)DS(ph)EEEVERK_	2 Phospho (STY)	sp|O43159|RRP8_HUMAN	1
_DRHDT(ph)PDPSPR_	Phospho (STY)	sp|Q9BRD0|BUD13_HUMAN	0.963		_DSNAPKS(ph)PLTGYVR_	Oxidation (M),Phospho (STY)	sp|Q9NP66|HM20A_HUMAN	0.997		_DSQDAS(ph)AEQSDHDDEVASLASASGGFGTK_	Phospho (STY)	sp|Q6P2E9|EDC4_HUMAN	0.814		_EADDDEEVDDNIPEMPS(ph)PK_	2 Phospho (STY)	sp|P26358|DNMT1_HUMAN	1		_EAEFS(ph)DPENTR_	Phospho (STY)	sp|Q5T481|RBM20_HUMAN	1		_ERS(ph)PALK_	Phospho (STY)	sp|Q9Y2W1|TR150_HUMAN	1		_HIKEEPLS(ph)EEEPCTSTAIASPEK_	Phospho (STY)	sp|Q9Y2X3|NOP58_HUMAN	1		_KGAAEEAELEDS(ph)DDEEKPVK_	Phospho (STY)	sp|Q9UBB9|TFP11_HUMAN	1		_KVVVS(ph)PTK_	Phospho (STY)	sp|P19338|NUCL_HUMAN	0.826		_QGS(ph)PVAAGAPAK_	Phospho (STY)	sp|Q9NZI8|IF2B1_HUMAN	1
_DRICS(ph)DEEEDEEK_	Phospho (STY)	sp|Q9NPG3|UBN1_HUMAN	1		_DSPAFPDS(ph)PWRER_	Phospho (STY)	sp|Q9NQS7|INCE_HUMAN	1		_DSQDASAEQS(ph)DHDDEVASLASASGGFGTK_	Phospho (STY)	sp|Q6P2E9|EDC4_HUMAN	0.901		_EADDDEEVDDNIPEMPS(ph)PKK_	Phospho (STY)	sp|P26358|DNMT1_HUMAN	1		_EAETKS(ph)PLVS(ph)PSK_	2 Phospho (STY)	sp|P35612|ADDB_HUMAN	0.919		_ERS(ph)PALKS(ph)PLQSVVVR_	2 Phospho (STY)	sp|Q9Y2W1|TR150_HUMAN	1		_HIKEEPLSEEEPCTSTAIAS(ph)PEK_	Phospho (STY)	sp|Q9Y2X3|NOP58_HUMAN	0.999		_KGDVEGSQS(ph)QDEGEGSGESER_	Phospho (STY)	sp|Q9UQE7|SMC3_HUMAN	0.946		_KWDGS(ph)EEDEDNSK_	Phospho (STY)	sp|O60841|IF2P_HUMAN	1		_QKFNDS(ph)EGDDTEETEDYR_	Phospho (STY)	sp|Q9NYF8|BCLF1_HUMAN	1
_DRQLS(ph)QEVTPADLECGLEGQAGSVQR_	Phospho (STY)	sp|Q9BY89|K1671_HUMAN	0.803		_DSPDS(ph)PEPPNK_	2 Phospho (STY)	sp|Q9NVM9|ASUN_HUMAN	1		_DSSDSADGRAT(ph)PSENLVPSSAR_	Phospho (STY)	sp|Q8N684|CPSF7_HUMAN	0.98		_EAEFS(ph)DPENTR_	Phospho (STY)	sp|Q5T481|RBM20_HUMAN	1		_EAGS(ph)PAQEFK_	Phospho (STY)	sp|Q5JSZ5|PRC2B_HUMAN	1		_ERS(ph)PS(ph)PLRGNVVPS(ph)PLPTR_	3 Phospho (STY)	sp|Q9Y2V2|CHSP1_HUMAN	0.977		_HIKEEPLSEEEPCTSTAIAS(ph)PEKK_	Phospho (STY)	sp|Q9Y2X3|NOP58_HUMAN	0.815		_KGGEFDEFVNDDT(ph)DDDLPISK_	Phospho (STY)	sp|Q6PD62|CTR9_HUMAN	1		_KY(ph)AM(ox)EQS(ph)IKS(ph)VLVK_	Oxidation (M),3 Phospho (STY)	sp|Q9UHX1|PUF60_HUMAN	1		_QKIDDRDS(ph)DEEGASDR_	Phospho (STY)	sp|Q8TDD1|DDX54_HUMAN	0.999
_DRS(ph)PHRS(ph)SPSDTRPK_	Phospho (STY)	sp|Q8IWS0|PHF6_HUMAN	0.929		_DSPDS(ph)PEPPNKKPLVEMDETPQVEK_	Oxidation (M),Phospho (STY)	sp|Q9NVM9|ASUN_HUMAN	0.81		_DSSGQEDETQS(ph)SNDDPSQSVASQDAQEIIRPR_	Phospho (STY)	sp|Q8N108|MIER1_HUMAN	0.836		_EAGS(ph)PAQEFK_	Phospho (STY)	sp|Q5JSZ5|PRC2B_HUMAN	1		_EALAEAALES(ph)PRPALVR_	Phospho (STY)	sp|O14745|NHRF1_HUMAN	1		_ERS(ph)PS(ph)PLRGNVVPSPLPTR_	2 Phospho (STY)	sp|Q9Y2V2|CHSP1_HUMAN	1		_HIVSNDSSDS(ph)DDESHEPK_	Phospho (STY)	sp|P47712|PA24A_HUMAN	0.924		_KGNAEGS(ph)S(ph)DEEGKLVIDEPAK_	2 Phospho (STY)	sp|P51858|HDGF_HUMAN	1		_KYKVLLT(ph)Y(ph)DT(ph)HVNK_	3 Phospho (STY)	sp|P25092|GUC2C_HUMAN	0.938		_QKM(ox)DS(ph)DEDEKEGEEEK_	Oxidation (M),Phospho (STY)	sp|Q96ST2|IWS1_HUMAN	1
_DRS(ph)PSRLDTFLK_	Phospho (STY)	sp|Q66GS9|CP135_HUMAN	0.99		_DSSDSADGRAT(ph)PSENLVPSSAR_	Oxidation (M),2 Phospho (STY)	sp|Q8N684|CPSF7_HUMAN	0.994		_DSYSSSRS(ph)DLYSSGR_	Phospho (STY)	sp|P38159|RBMX_HUMAN	0.958		_EALAEAALES(ph)PRPALVR_	2 Phospho (STY)	sp|O14745|NHRF1_HUMAN	1		_EAQQKVPDEEENEES(ph)DNEKETEK_	Phospho (STY)	sp|P11388|TOP2A_HUMAN	1		_ERSDS(ph)GGSSSEPFDR_	Phospho (STY)	sp|P48634|PRC2A_HUMAN	0.956		_HKSES(ph)PCESPYPNEK_	Phospho (STY)	sp|Q8NI27|THOC2_HUMAN	0.874		_KGPRT(ph)PS(ph)PPPPIPEDIALGK_	2 Phospho (STY)	sp|Q5T200|ZC3HD_HUMAN	1		_KYSDVEVPASVTGYSFASDGDSGTCS(ph)PLR_	Phospho (STY)	sp|P35611|ADDA_HUMAN	0.999		_QKMDS(ph)DEDEKEGEEEK_	Phospho (STY)	sp|Q96ST2|IWS1_HUMAN	1
_DRT(ph)PPHLLYSDR_	Oxidation (M),Phospho (STY)	sp|Q8NDT2|RB15B_HUMAN	1		_DSVAS(ph)T(ph)IT(ph)GVM(ox)DKTK_	2 Phospho (STY)	sp|Q99541|PLIN2_HUMAN	0.86		_DT(ph)QSPSTCSEGLLGWSQK_	Phospho (STY)	sp|Q9C0C2|TB182_HUMAN	0.981		_EAQSSQATPVQTSQPDSSNIVKVS(ph)PR_	Phospho (STY)	sp|Q8IZH2|XRN1_HUMAN	1		_EAS(ph)PAPLAQGEPGREDLPTR_	Phospho (STY)	sp|Q9P1Y6|PHRF1_HUMAN	1		_ERVDDSTGTVIS(ph)DVEEDAGELSR_	Phospho (STY)	sp|Q9Y2D8|ADIP_HUMAN	0.954		_HLDRS(ph)PESDRPR_	Phospho (STY)	sp|Q96T37|RBM15_HUMAN	0.983		_KGS(ph)DS(ph)DTDASNLETPR_	2 Phospho (STY)	sp|P0CG40|SP9_HUMAN	0.996		_KYSDVEVPASVTGYSFASDGDSGTCSPLRHS(ph)FQK_	Phospho (STY)	sp|P35611|ADDA_HUMAN	0.951		_QKS(ph)DAEEDGGT(ph)VSQEEEDRKPK_	2 Phospho (STY)	sp|P27824|CALX_HUMAN	0.844
_DRT(ph)PPHLLYSDRDR_	Phospho (STY)	sp|Q8NDT2|RB15B_HUMAN	1		_DSYSSSRS(ph)DLYSSGR_	Phospho (STY)	sp|P38159|RBMX_HUMAN	0.899		_DTASLSTTPSES(ph)PR_	Phospho (STY)	sp|Q9NQX3|GEPH_HUMAN	0.985		_EAS(ph)PAPLAQGEPGREDLPTR_	Phospho (STY)	sp|Q9P1Y6|PHRF1_HUMAN	1		_EASRPPEEPSAPS(ph)PTLPAQFK_	Phospho (STY)	sp|Q9H3P2|NELFA_HUMAN	0.96		_ES(ph)KEEETSIDVAGKPNEVTK_	Phospho (STY)	sp|P53985|MOT1_HUMAN	0.993		_HLS(ph)QEDNDLNK_	Phospho (STY)	sp|Q8N4S0|CCD82_HUMAN	1		_KHIKEEPLS(ph)EEEPCTSTAIAS(ph)PEK_	2 Phospho (STY)	sp|Q9Y2X3|NOP58_HUMAN	1		_KYVIS(ph)DEEEEDDD_	Phospho (STY)	sp|Q8WVC0|LEO1_HUMAN	1		_QKS(ph)DAEEDGGTVS(ph)QEEEDRKPK_	2 Phospho (STY)	sp|P27824|CALX_HUMAN	0.826
_DRT(ph)PPLLYR_	Phospho (STY)	sp|Q96T37|RBM15_HUMAN	1		_DTDGGPKEEES(ph)PV_	Phospho (STY)	sp|P53985|MOT1_HUMAN	1		_DTDGGPKEEES(ph)PV_	Phospho (STY)	sp|P53985|MOT1_HUMAN	1		_EASRPPEEPSAPS(ph)PTLPAQFK_	Phospho (STY)	sp|Q9H3P2|NELFA_HUMAN	0.992		_EATNTTSEPSAPSQDLLDLSPS(ph)PR_	Phospho (STY)	sp|O75674|TM1L1_HUMAN	0.991		_ES(ph)SPPREEAPPPPPPTEDSCAK_	Phospho (STY)	sp|Q9UPW6|SATB2_HUMAN	0.855		_HNS(ph)TTSSTSSGGYR_	Phospho (STY)	sp|Q8IZP0|ABI1_HUMAN	0.984		_KHS(ph)PS(ph)PPPPTPTESR_	2 Phospho (STY)	sp|Q92922|SMRC1_HUMAN	1		_LAEAPSPAPTPSPTPVEDLGPQTSTSPGRLS(ph)PDFAEELR_	Phospho (STY)	sp|Q14160|SCRIB_HUMAN	0.878		_QPLLLS(ph)EDEEDTK_	Phospho (STY)	sp|Q99613|EIF3C_HUMAN	1
_DRVLDDVSIRS(ph)PETK_	Phospho (STY)	sp|Q12830|BPTF_HUMAN	0.996		_DTDVEEGS(ph)EVEDERPAWNSK_	Phospho (STY)	sp|Q9H2J7|S6A15_HUMAN	1		_DTDVEEGS(ph)EVEDERPAWNSK_	Phospho (STY)	sp|Q9H2J7|S6A15_HUMAN	1		_EATAQKPTGSVGSTVT(ph)TPPPLVR_	Phospho (STY)	sp|Q86YP4|P66A_HUMAN	0.837		_ECINAAPDS(ph)PSK_	Phospho (STY)	sp|Q7Z569|BRAP_HUMAN	0.993		_ESDKEDGRES(ph)PSYDTPSQR_	Phospho (STY)	sp|Q9Y6M7|S4A7_HUMAN	0.996		_HPEPVPEEGS(ph)EDELPPQVHKV_	Phospho (STY)	sp|Q7Z3C6|ATG9A_HUMAN	1		_KIPDPDS(ph)DDVS(ph)EVDAR_	2 Phospho (STY)	sp|P51532|SMCA4_HUMAN	1		_LAEDEGDS(ph)EPEAVGQSR_	Phospho (STY)	sp|Q9UIG0|BAZ1B_HUMAN	1		_QPSS(ph)PYEDK_	Phospho (STY)	sp|Q9UQ35|SRRM2_HUMAN	0.803
_DS(ph)PDSPEPPNKKPLVEM(ox)DETPQVEK_	Phospho (STY)	sp|Q9NVM9|ASUN_HUMAN	0.866		_DTFEHDPS(ph)ESIDEFNK_	Phospho (STY)	sp|Q9NYF8|BCLF1_HUMAN	0.868		_DTFEHDPSES(ph)IDEFNK_	Phospho (STY)	sp|Q9NYF8|BCLF1_HUMAN	1		_EATAQKPTGSVGSTVTT(ph)PPPLVR_	Oxidation (M),2 Phospho (STY)	sp|Q86YP4|P66A_HUMAN	0.913		_EDAEGVAAEEEQEGDS(ph)GEQETGATDARPR_	Phospho (STY)	sp|Q96KC8|DNJC1_HUMAN	0.998		_ESDQTLAALLS(ph)PK_	Phospho (STY)	sp|P18583|SON_HUMAN	1		_HPKGEEGS(ph)DDDETENGPKPK_	Phospho (STY)	sp|Q6PD62|CTR9_HUMAN	1		_KKEEPSQNDIS(ph)PK_	Phospho (STY)	sp|Q9NR30|DDX21_HUMAN	1		_LAIQGPEDS(ph)PSR_	Phospho (STY)	sp|Q15773|MLF2_HUMAN	0.993		_QQDLHLES(ph)PQRQPEY(ph)S(ph)PESPR_	3 Phospho (STY)	sp|Q9H6F5|CCD86_HUMAN	0.844
_DS(ph)PPFTVILVASSR_	Oxidation (M),Phospho (STY)	sp|Q13972|RGRF1_HUMAN	1		_DTFEHDPSES(ph)IDEFNK_	Phospho (STY)	sp|Q9NYF8|BCLF1_HUMAN	1		_DTIIDVVGAPLT(ph)PNSR_	Phospho (STY)	sp|Q9NPF5|DMAP1_HUMAN	0.976		_EATNTTSEPSAPSQDLLDLSPS(ph)PR_	Phospho (STY)	sp|O75674|TM1L1_HUMAN	0.978		_EDALDDSVSSSSVHASPLASS(ph)PVRK_	Phospho (STY)	sp|P49792|RBP2_HUMAN	0.807		_ESEDDLNKES(ph)EEEVGPTK_	Phospho (STY)	sp|O43719|HTSF1_HUMAN	1		_HQAS(ph)DS(ph)ENEELPKPR_	2 Phospho (STY)	sp|Q96ST2|IWS1_HUMAN	1		_KKEPAITSQNS(ph)PEAR_	Phospho (STY)	sp|P23193|TCEA1_HUMAN	1		_LAPVPS(ph)PEPQKPAPVS(ph)PESVK_	2 Phospho (STY)	sp|Q96JM3|CHAP1_HUMAN	0.988		_QRGSETGS(ph)ET(ph)HESDLAPSDK_	2 Phospho (STY)	sp|P48634|PRC2A_HUMAN	0.902
_DSAIPVES(ph)DT(ph)DDEGAPR_	Phospho (STY)	sp|Q96D46|NMD3_HUMAN	1		_DTIIDVVGAPLT(ph)PNSR_	Phospho (STY)	sp|Q9NPF5|DMAP1_HUMAN	0.992		_DTPRPDHPPHDGHS(ph)PASR_	Phospho (STY)	sp|Q9C0J8|WDR33_HUMAN	0.993		_ECINAAPDS(ph)PSK_	Phospho (STY)	sp|Q7Z569|BRAP_HUMAN	0.98		_EDDDVIVNKPHVS(ph)DEEEEEPPFYHHPFK_	Phospho (STY)	sp|P18583|SON_HUMAN	1		_ESEDKPEIEDVGS(ph)DEEEEK_	Phospho (STY)	sp|P07900|HS90A_HUMAN	1		_HQAS(ph)DS(ph)ENEEPPKPR_	2 Phospho (STY)	sp|Q96ST2|IWS1_HUMAN	1		_KKY(ph)PEYGS(ph)LDLR_	2 Phospho (STY)	sp|Q30KQ9|DB110_HUMAN	0.976		_LASDDRPS(ph)PPR_	Phospho (STY)	sp|P98175|RBM10_HUMAN	1		_QRS(ph)PS(ph)PAPAPAPAAAAGPPTR_	2 Phospho (STY)	sp|Q9H7N4|SFR19_HUMAN	1
_DSAIPVES(ph)DTDDEGAPR_	Phospho (STY)	sp|Q96D46|NMD3_HUMAN	0.96		_DTPGHGSGWAET(ph)PRTDR_	Phospho (STY)	sp|O75533|SF3B1_HUMAN	0.963		_DTS(ph)GLER_	Phospho (STY)	sp|Q9H307|PININ_HUMAN	1		_EDAEGVAAEEEQEGDS(ph)GEQETGATDARPR_	Phospho (STY)	sp|Q96KC8|DNJC1_HUMAN	0.996		_EDILENEDEQNS(ph)PPKK_	Phospho (STY)	sp|Q9NTI5|PDS5B_HUMAN	1		_ESEDKPEIEDVGS(ph)DEEEEKK_	Phospho (STY)	sp|P07900|HS90A_HUMAN	1		_HQQQLLAS(ph)PGSSTVDNK_	Phospho (STY)	sp|Q9C0E2|XPO4_HUMAN	0.845		_KLEKEEEEGISQES(ph)S(ph)EEEQ_	2 Phospho (STY)	sp|P17096|HMGA1_HUMAN	1		_LCDFGSASHVADNDITPY(ph)LVSR_	Phospho (STY)	sp|Q13523|PRP4B_HUMAN	0.92		_QS(ph)PS(ph)PSTRPIR_	2 Phospho (STY)	sp|Q8IYB3|SRRM1_HUMAN	0.964
_DSAIPVESDT(ph)DDEGAPR_	2 Phospho (STY)	sp|Q96D46|NMD3_HUMAN	0.999		_DTPRPDHPPHDGHS(ph)PASR_	Phospho (STY)	sp|Q9C0J8|WDR33_HUMAN	0.998		_DTS(ph)PSSGSAVSSSK_	Phospho (STY)	sp|Q8NEY8|PPHLN_HUMAN	0.999		_EDALDDSVSSSSVHASPLASS(ph)PVRK_	Phospho (STY)	sp|P49792|RBP2_HUMAN	0.839		_EDLCT(ph)KT(ph)ENLLGSY(ph)FPKK_	3 Phospho (STY)	sp|Q06323|PSME1_HUMAN	0.904		_ESEDKPEIEDVGS(ph)DEEEEKKDGDK_	Phospho (STY)	sp|P07900|HS90A_HUMAN	1		_HQTLEVSLS(ph)RDSPLK_	Phospho (STY)	sp|Q8NCF5|NF2IP_HUMAN	0.924		_KLGAGEGGEAS(ph)VS(ph)PEK_	2 Phospho (STY)	sp|Q13428|TCOF_HUMAN	1		_LDGLVET(ph)PTGYIESLPR_	Phospho (STY)	sp|P55209|NP1L1_HUMAN	1		_QSFDDNDS(ph)EELEDK_	Phospho (STY)	sp|O60841|IF2P_HUMAN	1
_DSALAEAPEGLS(ph)PAPPAR_	Oxidation (M),Phospho (STY)	sp|Q9H9J4|UBP42_HUMAN	1		_DTS(ph)GLER_	2 Phospho (STY)	sp|Q9H307|PININ_HUMAN	1		_DTSATSQS(ph)VNGSPQAEQPSLESTSK_	Phospho (STY)	sp|Q86WB0|NIPA_HUMAN	0.867		_EDDDVIVNKPHVS(ph)DEEEEEPPFYHHPFK_	2 Phospho (STY)	sp|P18583|SON_HUMAN	1		_EDLPAENGETKTEES(ph)PAS(ph)DEAGEK_	2 Phospho (STY)	sp|P05114|HMGN1_HUMAN	1		_ESEDSETQPFDTHLEAYGPCLS(ph)PPR_	Phospho (STY)	sp|Q14676|MDC1_HUMAN	1		_HRPS(ph)PPAT(ph)PPPK_	2 Phospho (STY)	sp|Q8IYB3|SRRM1_HUMAN	1		_KLGAGEGGEASVS(ph)PEK_	Phospho (STY)	sp|Q13428|TCOF_HUMAN	1		_LDSQPQETS(ph)PELPR_	Phospho (STY)	sp|O14545|TRAD1_HUMAN	0.991		_QSFDDNDS(ph)EELEDKDSK_	Phospho (STY)	sp|O60841|IF2P_HUMAN	1
_DSATAAHPS(ph)EIAR_	2 Phospho (STY)	sp|Q86UP3|ZFHX4_HUMAN	0.999		_DTS(ph)PSSGSAVSSSK_	Phospho (STY)	sp|Q8NEY8|PPHLN_HUMAN	0.999		_DTSATSQSVNGS(ph)PQAEQPSLESTSK_	Phospho (STY)	sp|Q86WB0|NIPA_HUMAN	0.998		_EDILENEDEQNS(ph)PPKK_	2 Phospho (STY)	sp|Q9NTI5|PDS5B_HUMAN	1		_EDLPAENGETKTEES(ph)PASDEAGEK_	Phospho (STY)	sp|P05114|HMGN1_HUMAN	0.939		_ESEEGNPVRGS(ph)EEDS(ph)PKK_	2 Phospho (STY)	sp|O43719|HTSF1_HUMAN	0.999		_HS(ph)PIKEEPCGSLSETVCK_	Phospho (STY)	sp|Q68DK7|MSL1_HUMAN	1		_KLGVS(ph)VS(ph)PSR_	2 Phospho (STY)	sp|Q86VM9|ZCH18_HUMAN	1		_LDSS(ph)PSVSSTLAAK_	Phospho (STY)	sp|Q13428|TCOF_HUMAN	0.985		_QSNASS(ph)DVEVEEK_	Phospho (STY)	sp|O75475|PSIP1_HUMAN	0.939
_DSDQVAQS(ph)DGEESPAAEEQLLGEHIK_	Phospho (STY)	sp|O94979|SC31A_HUMAN	1		_DTSATSQS(ph)VNGSPQAEQPSLESTSK_	Phospho (STY)	sp|Q86WB0|NIPA_HUMAN	0.849		_DTSPDKGELVS(ph)DEEEDT_	Phospho (STY)	sp|Q9UPU7|TBD2B_HUMAN	1		_EDKPPLAPSGGTEGPEQPPPPCPS(ph)QTGSPPVGLIK_	2 Phospho (STY)	sp|Q8WWM7|ATX2L_HUMAN	0.909		_EDLPAENGETKTEESPAS(ph)DEAGEK_	Phospho (STY)	sp|P05114|HMGN1_HUMAN	0.998		_ESEEGNPVRGSEEDS(ph)PKK_	Phospho (STY)	sp|O43719|HTSF1_HUMAN	1		_HSEEAEFTPPLKCS(ph)PK_	Phospho (STY)	sp|Q3B726|RPA43_HUMAN	1		_KLPPPPPQAPPEEENES(ph)EPEEPSGVEGAAFQSR_	Phospho (STY)	sp|O60341|KDM1A_HUMAN	0.843		_LEDQLSEGRNS(ph)PEK_	Phospho (STY)	sp|Q5VUA4|ZN318_HUMAN	1		_QSQQPM(ox)KPIS(ph)PVKDPVS(ph)PASQK_	Oxidation (M),2 Phospho (STY)	sp|Q12888|TP53B_HUMAN	0.925
_DSDQVAQS(ph)DGEESPAAEEQLLGEHIKEEK_	Phospho (STY)	sp|O94979|SC31A_HUMAN	0.983		_DTSATSQSVNGS(ph)PQAEQPSLESTSK_	2 Phospho (STY)	sp|Q86WB0|NIPA_HUMAN	0.995		_DTTVISHS(ph)PNTSYDTALEAR_	Phospho (STY)	sp|Q4VCS5|AMOT_HUMAN	0.997		_EDLCT(ph)KT(ph)ENLLGSY(ph)FPKK_	Phospho (STY)	sp|Q06323|PSME1_HUMAN	0.94		_EDLSPAFDHS(ph)PNK_	Phospho (STY)	sp|P17706|PTN2_HUMAN	1		_ESESS(ph)PGQLSISLR_	Phospho (STY)	sp|P42684|ABL2_HUMAN	0.834		_HSLSGS(ph)SPGM(ox)K_	Oxidation (M),Phospho (STY)	sp|Q9UQ35|SRRM2_HUMAN	0.818		_KLS(ph)GDQPAAR_	Phospho (STY)	sp|Q13428|TCOF_HUMAN	1		_LEEPPELNRQS(ph)PNPR_	Phospho (STY)	sp|Q7Z5L9|I2BP2_HUMAN	1		_RADDFPVRDDPS(ph)DVT(ph)DEDEGPAEPPPPPK_	2 Phospho (STY)	sp|Q3YEC7|RABL6_HUMAN	1
_DSENLAS(ph)PSEYPENGER_	Phospho (STY)	sp|P52948|NUP98_HUMAN	1		_DTSPDKGELVS(ph)DEEEDT_	Phospho (STY)	sp|Q9UPU7|TBD2B_HUMAN	1		_DVATSPISPTENNTT(ph)PPDALTR_	Phospho (STY)	sp|Q13153|PAK1_HUMAN	0.98		_EDLPAENGETKTEESPAS(ph)DEAGEK_	Phospho (STY)	sp|P05114|HMGN1_HUMAN	1		_EDPQARPLEGSSSEDSPPEGQAPPSHS(ph)PR_	Phospho (STY)	sp|Q12789|TF3C1_HUMAN	0.994		_ESGVVAVS(ph)PEKSES(ph)PQKEDGLSSQLK_	2 Phospho (STY)	sp|Q96T58|MINT_HUMAN	0.92		_HSS(ph)IS(ph)PSTLTLK_	2 Phospho (STY)	sp|Q14004|CDK13_HUMAN	0.939		_KLS(ph)VPT(ph)S(ph)DEEDEVPAPKPR_	3 Phospho (STY)	sp|Q8NE71|ABCF1_HUMAN	1		_LEGGRQDS(ph)EDEEER_	Phospho (STY)	sp|Q9BYE7|PCGF6_HUMAN	1		_RAS(ph)IS(ph)EPS(ph)DTDPEPR_	3 Phospho (STY)	sp|Q8N1F8|S11IP_HUMAN	0.989
_DSGRGDS(ph)VSDSGSDALR_	Phospho (STY)	sp|Q53EL6|PDCD4_HUMAN	0.984		_DTTVIS(ph)HSPNTSYDTALEAR_	Phospho (STY)	sp|Q4VCS5|AMOT_HUMAN	0.914		_DVDDGS(ph)GSPHS(ph)PHQLSSK_	2 Phospho (STY)	sp|Q9H4A3|WNK1_HUMAN	0.984		_EDLREVLSEYPQAQT(ph)IM(ox)EEK_	Phospho (STY)	sp|Q8IV77|CNGA4_HUMAN	0.971		_EDQFNGS(ph)PPRPQPR_	Phospho (STY)	sp|Q69YN4|VIR_HUMAN	1		_ESKEEETS(ph)IDVAGKPNEVTK_	Phospho (STY)	sp|P53985|MOT1_HUMAN	0.943		_HSS(ph)NPPLESHVGWVM(ox)DSR_	Oxidation (M),Phospho (STY)	sp|Q6PKG0|LARP1_HUMAN	0.945		_KLSVPT(ph)S(ph)DEEDEVPAPKPR_	2 Phospho (STY)	sp|Q8NE71|ABCF1_HUMAN	1		_LERET(ph)FQVLNMYGKVVT(ph)VR_	2 Phospho (STY)	sp|O00267|SPT5H_HUMAN	0.996		_REEDEPEERS(ph)GDETPGSEVPGDK_	Phospho (STY)	sp|Q1KMD3|HNRL2_HUMAN	0.999
_DSGRGDSVS(ph)DSGSDALR_	Phospho (STY)	sp|Q53EL6|PDCD4_HUMAN	0.918		_DTTVISHS(ph)PNTS(ph)YDTALEAR_	2 Phospho (STY)	sp|Q4VCS5|AMOT_HUMAN	0.816		_DVDDGSGS(ph)PHS(ph)PHQLSSK_	2 Phospho (STY)	sp|Q9H4A3|WNK1_HUMAN	0.999		_EDLSPAFDHS(ph)PNK_	Phospho (STY)	sp|P17706|PTN2_HUMAN	0.999		_EDS(ph)GTFSLGK_	Phospho (STY)	sp|O75569|PRKRA_HUMAN	0.937		_ESLCDS(ph)PHQNLSRPLLENK_	Phospho (STY)	sp|O15042|SR140_HUMAN	0.995		_HSSDINHLVTQGRES(ph)PEGSYTDDANQEVR_	Phospho (STY)	sp|Q5T0N5|FBP1L_HUMAN	0.801		_KLT(ph)S(ph)DEEGEPSGK_	2 Phospho (STY)	sp|Q8WVC0|LEO1_HUMAN	1		_LEVTEIVKPS(ph)PK_	Phospho (STY)	sp|Q7Z6E9|RBBP6_HUMAN	1		_REEQT(ph)DTS(ph)DGESVTHHIR_	2 Phospho (STY)	sp|P36915|GNL1_HUMAN	0.84
_DSGSDQDLDGAGVRAS(ph)DLEDEESAAR_	Phospho (STY)	sp|Q86VM9|ZCH18_HUMAN	0.985		_DTTVISHS(ph)PNTSYDTALEAR_	2 Phospho (STY)	sp|Q4VCS5|AMOT_HUMAN	1		_DVDDGSGSPHS(ph)PHQLSSK_	Phospho (STY)	sp|Q9H4A3|WNK1_HUMAN	0.999		_EDPQARPLEGSSSEDSPPEGQAPPS(ph)HSPR_	Phospho (STY)	sp|Q12789|TF3C1_HUMAN	0.885		_EDSGT(ph)FSLGK_	Phospho (STY)	sp|O75569|PRKRA_HUMAN	0.96		_ESPRPLQLPGAEGPAIS(ph)DGEEGGGEPGAGGGAAGAAGAGR_	Phospho (STY)	sp|Q6PKG0|LARP1_HUMAN	1		_HST(ph)PS(ph)PTR_	2 Phospho (STY)	sp|P49792|RBP2_HUMAN	0.986		_KLT(ph)SDEEGEPSGK_	Phospho (STY)	sp|Q8WVC0|LEO1_HUMAN	0.906		_LFDEEEDS(ph)SEK_	Phospho (STY)	sp|O43719|HTSF1_HUMAN	0.886		_RES(ph)ES(ph)ESDETPPAAPQLIK_	2 Phospho (STY)	sp|O60832|DKC1_HUMAN	0.999
_DSGSDTASAIIPSTTPSVDSDDES(ph)VVK_	Phospho (STY)	sp|Q6WKZ4|RFIP1_HUMAN	0.971		_DTYSDRS(ph)GS(ph)SSPDSEITELK_	Phospho (STY)	sp|P17812|PYRG1_HUMAN	0.834		_DVEDM(ox)ELS(ph)DVEDDGSK_	Oxidation (M),Phospho (STY)	sp|Q5VT52|RPRD2_HUMAN	1		_EDPQARPLEGSSSEDSPPEGQAPPSHS(ph)PR_	2 Phospho (STY)	sp|Q12789|TF3C1_HUMAN	0.99		_EDTDHEEKAS(ph)NEDVTK_	Phospho (STY)	sp|O75475|PSIP1_HUMAN	1		_ESRQES(ph)DPEDDDVK_	Phospho (STY)	sp|Q9H307|PININ_HUMAN	1		_HSTPSNSSNPSGPPS(ph)PNSPHR_	Phospho (STY)	sp|Q9Y5S2|MRCKB_HUMAN	0.801		_KLTS(ph)DEEGEPSGK_	Phospho (STY)	sp|Q8WVC0|LEO1_HUMAN	0.899		_LFDEEEDSS(ph)EK_	Phospho (STY)	sp|O43719|HTSF1_HUMAN	0.981		_RES(ph)PS(ph)PAPKPR_	2 Phospho (STY)	sp|Q8IYB3|SRRM1_HUMAN	1
_DSISAVSSEKVS(ph)PSK_	Phospho (STY)	sp|P46821|MAP1B_HUMAN	0.987		_DVATSPISPTENNTT(ph)PPDALTR_	Phospho (STY)	sp|Q13153|PAK1_HUMAN	0.938		_DVEDMELS(ph)DVEDDGSK_	Phospho (STY)	sp|Q5VT52|RPRD2_HUMAN	1		_EDQFNGS(ph)PPRPQPR_	2 Phospho (STY)	sp|Q69YN4|VIR_HUMAN	1		_EDVEVAES(ph)PLR_	Phospho (STY)	sp|Q99567|NUP88_HUMAN	1		_ESRQES(ph)DPEDDDVKKPALQSSVVATSK_	Phospho (STY)	sp|Q9H307|PININ_HUMAN	0.996		_HSTPSNSSNPSGPPSPNS(ph)PHR_	Phospho (STY)	sp|Q9Y5S2|MRCKB_HUMAN	0.85		_KM(ox)S(ph)QPGS(ph)PSPK_	Oxidation (M),2 Phospho (STY)	sp|Q14839|CHD4_HUMAN	0.999		_LFEDDDS(ph)NEK_	Phospho (STY)	sp|O43719|HTSF1_HUMAN	1		_RES(ph)QNGEHR_	Phospho (STY)	sp|Q8WVS4|WDR60_HUMAN	1
_DSLIT(ph)PHVS(ph)R_	2 Phospho (STY)	sp|P49792|RBP2_HUMAN	1		_DVDASPS(ph)PLSVQDLK_	Phospho (STY)	sp|Q8IWZ8|SUGP1_HUMAN	0.999		_DVNSSS(ph)PVM(ox)LAFK_	Oxidation (M),Phospho (STY)	sp|Q99598|TSNAX_HUMAN	0.983		_EDS(ph)GLFSPIR_	2 Phospho (STY)	sp|Q9UKA4|AKA11_HUMAN	0.988		_EDVSASGPS(ph)PEATQLAK_	Phospho (STY)	sp|Q96T58|MINT_HUMAN	0.996		_ESS(ph)PEKEAEEGCPEK_	Phospho (STY)	sp|O43719|HTSF1_HUMAN	0.951		_HTGPNS(ph)PDTANDGFVR_	Phospho (STY)	sp|P31943|HNRH1_HUMAN	1		_KMS(ph)QPGS(ph)PSPK_	2 Phospho (STY)	sp|Q14839|CHD4_HUMAN	0.975		_LFEES(ph)DDKEDEDADGK_	Phospho (STY)	sp|O43719|HTSF1_HUMAN	1		_RES(ph)RQES(ph)DPEDDDVK_	2 Phospho (STY)	sp|Q9H307|PININ_HUMAN	1
_DSLIT(ph)PHVSR_	Phospho (STY)	sp|P49792|RBP2_HUMAN	0.986		_DVDDGS(ph)GSPHS(ph)PHQLSSK_	Phospho (STY)	sp|Q9H4A3|WNK1_HUMAN	0.939		_DVPPDILLDS(ph)PERK_	Phospho (STY)	sp|Q6KC79|NIPBL_HUMAN	1		_EDTDHEEKAS(ph)NEDVTK_	Phospho (STY)	sp|O75475|PSIP1_HUMAN	0.994		_EEAPAS(ph)PLRPLYPQIS(ph)PLK_	2 Phospho (STY)	sp|P85037|FOXK1_HUMAN	1		_ESSANNSVS(ph)PSESLR_	Phospho (STY)	sp|Q04726|TLE3_HUMAN	0.998		_HVDSLSQRS(ph)PK_	Phospho (STY)	sp|Q9UHD8|SEPT9_HUMAN	0.986		_KNRS(ph)S(ph)VK_	2 Phospho (STY)	sp|Q14676|MDC1_HUMAN	1		_LFEES(ph)DDKEDEDADGKEVEDADEK_	Phospho (STY)	sp|O43719|HTSF1_HUMAN	1		_RET(ph)PS(ph)PRPM(ox)R_	Oxidation (M),2 Phospho (STY)	sp|Q9UQ35|SRRM2_HUMAN	1
_DSNAPKS(ph)PLTGYVR_	Phospho (STY)	sp|Q9NP66|HM20A_HUMAN	0.994		_DVDDGSGS(ph)PHS(ph)PHQLSSK_	2 Phospho (STY)	sp|Q9H4A3|WNK1_HUMAN	0.892		_DVT(ph)PPPETEVVLIK_	Phospho (STY)	sp|P27816|MAP4_HUMAN	1		_EDVEVAES(ph)PLR_	Oxidation (M),Phospho (STY)	sp|Q99567|NUP88_HUMAN	1		_EEAS(ph)DDDM(ox)EGDEAVVR_	Oxidation (M),Phospho (STY)	sp|O75643|U520_HUMAN	1		_ESSANNSVSPSES(ph)LR_	Phospho (STY)	sp|Q04726|TLE3_HUMAN	0.88		_HVTLPSS(ph)PR_	Phospho (STY)	sp|Q5T4S7|UBR4_HUMAN	0.808		_KNS(ph)STDQGS(ph)DEEGSLQK_	2 Phospho (STY)	sp|Q12789|TF3C1_HUMAN	0.997		_LGAGEGGEASVS(ph)PEK_	Phospho (STY)	sp|Q13428|TCOF_HUMAN	1		_RETAS(ph)VLVNY(ph)R_	2 Phospho (STY)	sp|Q9NZM3|ITSN2_HUMAN	1
_DSQDAS(ph)AEQSDHDDEVASLASASGGFGTK_	Oxidation (M),Phospho (STY)	sp|Q6P2E9|EDC4_HUMAN	0.976		_DVDDGSGSPHS(ph)PHQLSSK_	Phospho (STY)	sp|Q9H4A3|WNK1_HUMAN	0.848		_DVTLS(ph)PVK_	Phospho (STY)	sp|Q8NFC6|BD1L1_HUMAN	0.996		_EEAPAS(ph)PLRPLYPQIS(ph)PLK_	Phospho (STY)	sp|P85037|FOXK1_HUMAN	1		_EEAS(ph)DDDMEGDEAVVR_	Phospho (STY)	sp|O75643|U520_HUMAN	1		_ESSIIAPAPAEDVDT(ph)PPR_	Phospho (STY)	sp|Q15910|EZH2_HUMAN	1		_IAAPELHKGDS(ph)DS(ph)EEDEPTK_	2 Phospho (STY)	sp|Q92733|PRCC_HUMAN	1		_KPAQEETEETSSQES(ph)AEED_	Phospho (STY)	sp|P52926|HMGA2_HUMAN	1		_LGAGGGS(ph)PEKS(ph)PSAQELK_	2 Phospho (STY)	sp|Q9UNE7|CHIP_HUMAN	0.997		_REVLYDS(ph)EGLS(ph)GEER_	2 Phospho (STY)	sp|Q9H7N4|SFR19_HUMAN	1
_DSQNS(ph)SQHSVSSHR_	2 Phospho (STY)	sp|Q96QZ7|MAGI1_HUMAN	0.821		_DVEDM(ox)ELS(ph)DVEDDGSK_	2 Phospho (STY)	sp|Q5VT52|RPRD2_HUMAN	1		_DVTNFTVGGFAPM(ox)S(ph)PR_	Oxidation (M),Phospho (STY)	sp|O00267|SPT5H_HUMAN	1		_EEAPAS(ph)PLRPLYPQISPLK_	Oxidation (M),2 Phospho (STY)	sp|P85037|FOXK1_HUMAN	1		_EEAT(ph)YGVWAERDSDDERPSFGGK_	Phospho (STY)	sp|Q9UBB9|TFP11_HUMAN	0.958		_ESSIIAPAPAEDVDT(ph)PPRK_	Phospho (STY)	sp|Q15910|EZH2_HUMAN	1		_IAAPELHKGDSDS(ph)EEDEPTK_	Phospho (STY)	sp|Q92733|PRCC_HUMAN	0.805		_KPATPAEDDEDDDIDLFGS(ph)DNEEEDKEAAQLR_	Phospho (STY)	sp|P29692|EF1D_HUMAN	0.997		_LGASNS(ph)PGQPNSVK_	Phospho (STY)	sp|P49756|RBM25_HUMAN	1		_RGEGDAPFSEPGTTSTQRPS(ph)S(ph)PETATK_	2 Phospho (STY)	sp|Q9UQ35|SRRM2_HUMAN	0.985
_DSSDSADGRAT(ph)PSENLVPSSAR_	2 Phospho (STY)	sp|Q8N684|CPSF7_HUMAN	0.998		_DVEDMELS(ph)DVEDDGSK_	Phospho (STY)	sp|Q5VT52|RPRD2_HUMAN	1		_DVVLS(ph)TSPK_	Phospho (STY)	sp|Q9P275|UBP36_HUMAN	0.847		_EEAPASPLRPLYPQIS(ph)PLK_	2 Phospho (STY)	sp|P85037|FOXK1_HUMAN	1		_EEATYGVWAERDS(ph)DDERPSFGGK_	Phospho (STY)	sp|Q9UBB9|TFP11_HUMAN	1		_ESTQLS(ph)PADLTEGKPTDPSK_	Phospho (STY)	sp|Q08J23|NSUN2_HUMAN	0.864		_IAQEIAS(ph)LSK_	Phospho (STY)	sp|Q15311|RBP1_HUMAN	0.967		_KPGPPLS(ph)PEIRS(ph)PAGS(ph)PELR_	3 Phospho (STY)	sp|Q96JM3|CHAP1_HUMAN	1		_LGGLRPES(ph)PESLTSVSR_	Phospho (STY)	sp|Q9H6F5|CCD86_HUMAN	1		_RGS(ph)RS(ph)S(ph)PEPK_	3 Phospho (STY)	sp|Q9UQ35|SRRM2_HUMAN	1
_DSYSSSRS(ph)DLYSSGR_	Phospho (STY)	sp|P38159|RBMX_HUMAN	0.951		_DVIS(ph)EAIAK_	2 Phospho (STY)	sp|Q96M32|KAD7_HUMAN	1		_DVVLSTS(ph)PK_	Phospho (STY)	sp|Q9P275|UBP36_HUMAN	0.823		_EEAS(ph)DDDM(ox)EGDEAVVR_	Phospho (STY)	sp|O75643|U520_HUMAN	1		_EEDEEPES(ph)PPEK_	Phospho (STY)	sp|Q9H1E3|NUCKS_HUMAN	1		_ESVPEFPLS(ph)PPK_	Phospho (STY)	sp|P16949|STMN1_HUMAN	1		_IAQEIASLS(ph)K_	Phospho (STY)	sp|Q15311|RBP1_HUMAN	0.932		_KPGPSGPSES(ph)PK_	Phospho (STY)	sp|Q96JM3|CHAP1_HUMAN	0.936		_LGIAVIHGEAQDAESDLVDGRHS(ph)PPM(ox)VR_	Oxidation (M),Phospho (STY)	sp|O60256|KPRB_HUMAN	1		_RHCAPS(ph)PDRS(ph)PELSSSR_	2 Phospho (STY)	sp|Q96T37|RBM15_HUMAN	0.999
_DT(ph)QSPSTCSEGLLGWSQK_	Phospho (STY)	sp|Q9C0C2|TB182_HUMAN	0.83		_DVISNTSDVIGTCEAADVAQKVDEDS(ph)AEDTQSNDGK_	Phospho (STY)	sp|Q9H2G2|SLK_HUMAN	0.862		_DVYLS(ph)PR_	Phospho (STY)	sp|P38159|RBMX_HUMAN	1		_EEAS(ph)DDDMEGDEAVVR_	Phospho (STY)	sp|O75643|U520_HUMAN	1		_EEDEEPES(ph)PPEKK_	Phospho (STY)	sp|Q9H1E3|NUCKS_HUMAN	1		_ESYTEEIVS(ph)EAESHVSGISR_	Phospho (STY)	sp|Q5QJE6|TDIF2_HUMAN	0.996		_IDASKNEEDEGHS(ph)NSS(ph)PR_	2 Phospho (STY)	sp|Q14103|HNRPD_HUMAN	1		_KPIET(ph)GSPK_	Phospho (STY)	sp|Q05519|SRS11_HUMAN	0.978		_LGIAVIHGEAQDAESDLVDGRHS(ph)PPMVR_	Phospho (STY)	sp|O60256|KPRB_HUMAN	0.999		_RHS(ph)PS(ph)RS(ph)AS(ph)PSPR_	4 Phospho (STY)	sp|Q8IYB3|SRRM1_HUMAN	0.868
_DTASLSTTPSES(ph)PR_	Phospho (STY)	sp|Q9NQX3|GEPH_HUMAN	0.916		_DVKSEKLT(ph)T(ph)K_	Phospho (STY)	sp|Q7Z6E9|RBBP6_HUMAN	0.996		_DVYLS(ph)PRDDGYSTK_	Phospho (STY)	sp|P38159|RBMX_HUMAN	1		_EEASLLSHSPGTSNQSQPCS(ph)PKPIR_	Phospho (STY)	sp|Q9H4Z3|PCIF1_HUMAN	1		_EEDEPEERS(ph)GDETPGSEVPGDK_	Phospho (STY)	sp|Q1KMD3|HNRL2_HUMAN	1		_ETAPEEPGS(ph)PAK_	Phospho (STY)	sp|P35612|ADDB_HUMAN	1		_IDASKNEEDEGHSNS(ph)SPR_	Phospho (STY)	sp|Q14103|HNRPD_HUMAN	0.987		_KPISDNSFS(ph)S(ph)DEEQSTGPIK_	2 Phospho (STY)	sp|O60293|ZC3H1_HUMAN	0.889		_LGPGRPLPTFPTSECTS(ph)DVEPDTR_	Phospho (STY)	sp|Q8TDD1|DDX54_HUMAN	0.952		_RIDFTPVS(ph)PAPS(ph)PTR_	2 Phospho (STY)	sp|Q7Z309|F122B_HUMAN	0.996
_DTDGGPKEEES(ph)PV_	2 Phospho (STY)	sp|P53985|MOT1_HUMAN	1		_DVLS(ph)PLRPSR_	Phospho (STY)	sp|Q12756|KIF1A_HUMAN	0.997		_DY(ph)EQPTCAKVENAQFK_	Phospho (STY)	sp|Q9UK61|F208A_HUMAN	1		_EEATYGVWAERDS(ph)DDERPSFGGK_	Phospho (STY)	sp|Q9UBB9|TFP11_HUMAN	1		_EEDGADAS(ph)EEDLTR_	Phospho (STY)	sp|Q86X53|ERIC1_HUMAN	1		_ETAVPGPLGIEDIS(ph)PNLS(ph)PDDK_	2 Phospho (STY)	sp|Q12888|TP53B_HUMAN	1		_IDASKNEEDEGHSNSS(ph)PR_	Phospho (STY)	sp|Q14103|HNRPD_HUMAN	0.997		_KPPAPPS(ph)PVQSQS(ph)PSTNWS(ph)PAVPVK_	3 Phospho (STY)	sp|Q8IYB3|SRRM1_HUMAN	0.905		_LGS(ph)PKPER_	Phospho (STY)	sp|Q86VM9|ZCH18_HUMAN	1		_RKAEDS(ph)DS(ph)EPEPEDNVR_	2 Phospho (STY)	sp|Q9H0D6|XRN2_HUMAN	1
_DTDVEEGS(ph)EVEDERPAWNSK_	Phospho (STY)	sp|Q9H2J7|S6A15_HUMAN	1		_DVNSSS(ph)PVM(ox)LAFK_	Phospho (STY)	sp|Q99598|TSNAX_HUMAN	0.809		_DYDDM(ox)S(ph)PR_	Oxidation (M),Phospho (STY)	sp|P61978|HNRPK_HUMAN	1		_EEDCHS(ph)PTSKPPKPDQPLK_	2 Phospho (STY)	sp|P23588|IF4B_HUMAN	0.813		_EEEDKDDEEKPKIEDVGS(ph)DEEDDSGK_	Phospho (STY)	sp|P08238|HS90B_HUMAN	1		_ETAVPGPLGIEDISPNLS(ph)PDDK_	Phospho (STY)	sp|Q12888|TP53B_HUMAN	1		_IDDRDS(ph)DEEGASDR_	Phospho (STY)	sp|Q8TDD1|DDX54_HUMAN	1		_KPPAPPS(ph)PVQSQS(ph)PSTNWSPAVPVK_	2 Phospho (STY)	sp|Q8IYB3|SRRM1_HUMAN	0.927		_LGS(ph)PVDNLEDM(ox)DRDDLTDDSVFTR_	Oxidation (M),Phospho (STY)	sp|Q5VUA4|ZN318_HUMAN	1		_RKHS(ph)PS(ph)PPPPTPTESR_	2 Phospho (STY)	sp|Q92922|SMRC1_HUMAN	1
_DTFEHDPSES(ph)IDEFNK_	Phospho (STY)	sp|Q9NYF8|BCLF1_HUMAN	1		_DVPPDILLDS(ph)PERK_	Phospho (STY)	sp|Q6KC79|NIPBL_HUMAN	1		_DYDDMS(ph)PR_	Phospho (STY)	sp|P61978|HNRPK_HUMAN	1		_EEDCHSPT(ph)SKPPKPDQPLK_	Phospho (STY)	sp|P23588|IF4B_HUMAN	0.802		_EEEPEAEEEEVAAKKS(ph)PVK_	Phospho (STY)	sp|P07197|NFM_HUMAN	1		_ETCSTLAES(ph)PR_	Phospho (STY)	sp|Q6P2E9|EDC4_HUMAN	1		_IDEDGENTQIEDTEPM(ox)S(ph)PVLNSK_	Oxidation (M),Phospho (STY)	sp|Q12888|TP53B_HUMAN	0.996		_KPS(ph)PQPSS(ph)PR_	2 Phospho (STY)	sp|O75909|CCNK_HUMAN	0.981		_LGS(ph)PVDNLEDMDRDDLTDDSVFTR_	Phospho (STY)	sp|Q5VUA4|ZN318_HUMAN	1		_RKS(ph)LS(ph)DS(ph)ESDDSK_	3 Phospho (STY)	sp|Q13185|CBX3_HUMAN	1
_DTIIDVVGAPLT(ph)PNSR_	Phospho (STY)	sp|Q9NPF5|DMAP1_HUMAN	0.98		_DVT(ph)PPPETEVVLIK_	2 Phospho (STY)	sp|P27816|MAP4_HUMAN	1		_DYDEEEQGYDS(ph)EKEK_	Phospho (STY)	sp|Q05519|SRS11_HUMAN	1		_EEDEEPES(ph)PPEK_	Phospho (STY)	sp|Q9H1E3|NUCKS_HUMAN	1		_EEETS(ph)IDVAGKPNEVTK_	Phospho (STY)	sp|P53985|MOT1_HUMAN	0.941		_ETDPVKS(ph)PPLPEHQK_	Phospho (STY)	sp|Q96JM3|CHAP1_HUMAN	0.998		_IDENS(ph)DKEM(ox)EVEES(ph)PEK_	Oxidation (M),2 Phospho (STY)	sp|Q8N3X1|FNBP4_HUMAN	1		_KPS(ph)PSES(ph)PEPWKPFPAVS(ph)PEPR_	3 Phospho (STY)	sp|Q96JM3|CHAP1_HUMAN	0.941		_LHVGNIS(ph)PTCTNK_	Phospho (STY)	sp|Q9BWF3|RBM4_HUMAN	0.974		_RKS(ph)LS(ph)DSESDDSK_	2 Phospho (STY)	sp|Q13185|CBX3_HUMAN	0.994
_DTIIDVVGAPLTPNS(ph)R_	Phospho (STY)	sp|Q9NPF5|DMAP1_HUMAN	0.996		_DVTLS(ph)PVK_	Phospho (STY)	sp|Q8NFC6|BD1L1_HUMAN	0.998		_DYEIESQNPLAS(ph)PTNTLLGSAK_	Phospho (STY)	sp|Q7Z417|NUFP2_HUMAN	0.852		_EEDEEPES(ph)PPEKK_	Phospho (STY)	sp|Q9H1E3|NUCKS_HUMAN	1		_EEEWDPEYT(ph)PK_	Phospho (STY)	sp|Q9NYF8|BCLF1_HUMAN	1		_ETERAS(ph)PIK_	Phospho (STY)	sp|P27816|MAP4_HUMAN	1		_IDENS(ph)DKEMEVEES(ph)PEK_	2 Phospho (STY)	sp|Q8N3X1|FNBP4_HUMAN	1		_KPS(ph)PSES(ph)PEPWKPFPAVSPEPR_	2 Phospho (STY)	sp|Q96JM3|CHAP1_HUMAN	0.853		_LIRPEYAWIVQPVSGAVYDRPGAS(ph)PK_	Phospho (STY)	sp|Q12769|NU160_HUMAN	1		_RKS(ph)LSDSES(ph)DDSK_	2 Phospho (STY)	sp|Q13185|CBX3_HUMAN	0.905
_DTPRPDHPPHDGHS(ph)PASR_	Phospho (STY)	sp|Q9C0J8|WDR33_HUMAN	0.999		_DVTNFTVGGFAPM(ox)S(ph)PR_	2 Phospho (STY)	sp|O00267|SPT5H_HUMAN	1		_DYGHS(ph)SSRDDYPSR_	Phospho (STY)	sp|P38159|RBMX_HUMAN	0.873		_EEDEPEERS(ph)GDETPGSEVPGDK_	Phospho (STY)	sp|Q1KMD3|HNRL2_HUMAN	1		_EEGPPPPS(ph)PDGASSDAEPEPPSGR_	Phospho (STY)	sp|Q9NTJ3|SMC4_HUMAN	0.962		_ETES(ph)EAEDNLDDLEK_	Phospho (STY)	sp|Q8IYB3|SRRM1_HUMAN	0.995		_IDIS(ph)PSTFR_	Phospho (STY)	sp|Q9Y2W1|TR150_HUMAN	0.999		_KPSGS(ph)PDLWKLS(ph)PDQR_	2 Phospho (STY)	sp|Q96JM3|CHAP1_HUMAN	0.957		_LKFS(ph)DDEEEEEVVK_	Phospho (STY)	sp|Q5JSZ5|PRC2B_HUMAN	1		_RKT(ph)SSDDES(ph)EEDEDDLLQR_	2 Phospho (STY)	sp|Q9Y5J1|UTP18_HUMAN	0.977
_DTQS(ph)PSTCSEGLLGWSQK_	Phospho (STY)	sp|Q9C0C2|TB182_HUMAN	0.845		_DVTNFTVGGFAPMS(ph)PR_	Phospho (STY)	sp|O00267|SPT5H_HUMAN	1		_DYLLS(ph)ESEDEGDNDGERK_	Phospho (STY)	sp|Q9BVJ6|UT14A_HUMAN	0.998		_EEDFRRPS(ph)EEDFR_	Phospho (STY)	sp|Q8IXT5|RB12B_HUMAN	1		_EEGS(ph)DIEDEDM(ox)EELLNDTR_	Oxidation (M),Phospho (STY)	sp|Q8NHQ9|DDX55_HUMAN	1		_ETESAPGS(ph)PR_	Phospho (STY)	sp|Q6PKG0|LARP1_HUMAN	0.93		_IDIS(ph)PSTLR_	Phospho (STY)	sp|Q9NYF8|BCLF1_HUMAN	0.998		_KPVTVS(ph)PTTPTS(ph)PTEGEAS_	2 Phospho (STY)	sp|Q9Y6G9|DC1L1_HUMAN	0.985		_LLEDS(ph)EES(ph)SEETVSR_	2 Phospho (STY)	sp|O60231|DHX16_HUMAN	0.943		_RLEIS(ph)PDS(ph)SPER_	2 Phospho (STY)	sp|Q99959|PKP2_HUMAN	0.896
_DTS(ph)PSSGSAVSSSK_	2 Oxidation (M),Phospho (STY)	sp|Q8NEY8|PPHLN_HUMAN	0.99		_DVYLS(ph)PR_	2 Phospho (STY)	sp|P38159|RBMX_HUMAN	1		_DYS(ph)PSRNPPEVEAR_	Phospho (STY)	sp|Q9HCM7|FBSL_HUMAN	0.868		_EEDGADAS(ph)EEDLTR_	Phospho (STY)	sp|Q86X53|ERIC1_HUMAN	0.996		_EEGS(ph)DIEDEDMEELLNDTR_	Phospho (STY)	sp|Q8NHQ9|DDX55_HUMAN	1		_ETPHS(ph)PGVEDAPIAK_	Phospho (STY)	sp|Q9UHB6|LIMA1_HUMAN	0.933		_IDIS(ph)PSTLRK_	Phospho (STY)	sp|Q9NYF8|BCLF1_HUMAN	0.942		_KPVTVSPTT(ph)PTS(ph)PTEGEAS_	2 Phospho (STY)	sp|Q9Y6G9|DC1L1_HUMAN	0.911		_LLKPGEEPSEYT(ph)DEEDTK_	Phospho (STY)	sp|O15173|PGRC2_HUMAN	1		_RLLGDS(ph)DS(ph)EEEQK_	2 Phospho (STY)	sp|Q9BW71|HIRP3_HUMAN	1
_DTSATSQSVNGS(ph)PQAEQPSLESTSK_	Phospho (STY)	sp|Q86WB0|NIPA_HUMAN	0.915		_DVYLS(ph)PRDDGYSTK_	Phospho (STY)	sp|P38159|RBMX_HUMAN	1		_DYS(ph)YER_	Phospho (STY)	sp|P48634|PRC2A_HUMAN	0.997		_EEEDKDDEEKPKIEDVGS(ph)DEEDDSGK_	2 Phospho (STY)	sp|P08238|HS90B_HUMAN	1		_EEGS(ph)LSDTEADAVSGQLPDPTTNPSAGK_	Phospho (STY)	sp|Q8N1G4|LRC47_HUMAN	0.906		_ETQS(ph)PEQVK_	Phospho (STY)	sp|Q9NYF8|BCLF1_HUMAN	1		_IDS(ph)NISPKK_	Phospho (STY)	sp|Q9H501|ESF1_HUMAN	0.81		_KPVTVSPTTPTS(ph)PTEGEAS_	Phospho (STY)	sp|Q9Y6G9|DC1L1_HUMAN	0.962		_LLLERPS(ph)PIRDR_	Phospho (STY)	sp|Q96T37|RBM15_HUMAN	1		_RLPQDHADSCVVS(ph)S(ph)DDEELSR_	2 Phospho (STY)	sp|P78317|RNF4_HUMAN	0.991
_DTSPDKGELVS(ph)DEEEDT_	2 Phospho (STY)	sp|Q9UPU7|TBD2B_HUMAN	1		_DYDDM(ox)S(ph)PR_	Phospho (STY)	sp|P61978|HNRPK_HUMAN	1		_DYTGCSTSESLS(ph)PVK_	Phospho (STY)	sp|O95297|MPZL1_HUMAN	0.999		_EEETS(ph)IDVAGKPNEVTK_	2 Phospho (STY)	sp|P53985|MOT1_HUMAN	0.989		_EEHGGLIRS(ph)PR_	Phospho (STY)	sp|P26368|U2AF2_HUMAN	1		_ETVQT(ph)TQSPTPVEK_	Phospho (STY)	sp|Q9UPN6|SCAF8_HUMAN	0.958		_IDSNIS(ph)PKK_	Phospho (STY)	sp|Q9H501|ESF1_HUMAN	0.91		_KQETAAVCGET(ph)DEEAGES(ph)GGEGIFR_	2 Phospho (STY)	sp|Q9ULL5|PRR12_HUMAN	1		_LLPEGEETLES(ph)DDEKDEHTSK_	Phospho (STY)	sp|Q8N6N3|CA052_HUMAN	0.827		_RLPQDHADSCVVSS(ph)DDEELS(ph)R_	2 Phospho (STY)	sp|P78317|RNF4_HUMAN	0.808
_DTTVISHS(ph)PNT(ph)SYDTALEAR_	Phospho (STY)	sp|Q4VCS5|AMOT_HUMAN	0.806		_DYDDMS(ph)PR_	Phospho (STY)	sp|P61978|HNRPK_HUMAN	1		_EAAGPAPS(ph)PM(ox)R_	Oxidation (M),Phospho (STY)	sp|Q12834|CDC20_HUMAN	1		_EEEWDPEYT(ph)PK_	Phospho (STY)	sp|Q9Y2W1|TR150_HUMAN	1		_EEKEES(ph)DDEAAVEEEEEEK_	Phospho (STY)	sp|P14625|ENPL_HUMAN	1		_ETVQTTQSPT(ph)PVEK_	Phospho (STY)	sp|Q9UPN6|SCAF8_HUMAN	0.911		_IDTHPS(ph)PSHSSTVK_	Phospho (STY)	sp|Q8NI27|THOC2_HUMAN	0.998		_KQPAS(ph)PDGRTS(ph)PINEDIR_	2 Phospho (STY)	sp|Q9P2R6|RERE_HUMAN	0.98		_LNDPFQPFPGNDS(ph)PK_	Phospho (STY)	sp|P42566|EPS15_HUMAN	1		_RLS(ph)PS(ph)AS(ph)PPR_	3 Phospho (STY)	sp|Q8IYB3|SRRM1_HUMAN	1
_DTTVISHS(ph)PNTSYDTALEAR_	Phospho (STY)	sp|Q4VCS5|AMOT_HUMAN	0.999		_DYDEEEQGYDS(ph)EKEK_	Phospho (STY)	sp|Q05519|SRS11_HUMAN	1		_EAALPPVS(ph)PLK_	Phospho (STY)	sp|Q04637|IF4G1_HUMAN	1		_EEGS(ph)DIEDEDM(ox)EELLNDTR_	Oxidation (M),Phospho (STY)	sp|Q8NHQ9|DDX55_HUMAN	1		_EELM(ox)S(ph)S(ph)DLEETAGSTSIPK_	Oxidation (M),2 Phospho (STY)	sp|O00567|NOP56_HUMAN	1		_ETVSEAPPLLFS(ph)DEEEK_	Phospho (STY)	sp|Q641Q2|FA21A_HUMAN	1		_IEDVGS(ph)DEEDDSGK_	Phospho (STY)	sp|P08238|HS90B_HUMAN	1		_KQS(ph)FDDNDSEELEDK_	Phospho (STY)	sp|O60841|IF2P_HUMAN	0.82		_LNHS(ph)PPQSSSR_	Phospho (STY)	sp|Q5T8P6|RBM26_HUMAN	1		_RLS(ph)PS(ph)ASPPR_	2 Phospho (STY)	sp|Q8IYB3|SRRM1_HUMAN	0.849
_DVAM(ox)WFS(ph)KR_	Phospho (STY)	sp|Q15413|RYR3_HUMAN	1		_DYGHS(ph)SSRDDYPSR_	Phospho (STY)	sp|P38159|RBMX_HUMAN	0.985		_EAARS(ph)PDKPGGS(ph)PSASR_	2 Phospho (STY)	sp|Q9Y3T9|NOC2L_HUMAN	0.936		_EEGS(ph)DIEDEDMEELLNDTR_	Phospho (STY)	sp|Q8NHQ9|DDX55_HUMAN	1		_EELM(ox)S(ph)SDLEETAGSTSIPK_	Oxidation (M),Phospho (STY)	sp|O00567|NOP56_HUMAN	0.982		_EVAENQQNQS(ph)SDPEEEK_	Phospho (STY)	sp|O43491|E41L2_HUMAN	0.982		_IEDVGS(ph)DEEDDSGKDK_	Phospho (STY)	sp|P08238|HS90B_HUMAN	1		_KQSFDDNDS(ph)EELEDK_	Phospho (STY)	sp|O60841|IF2P_HUMAN	1		_LNHVAAGLVS(ph)PSLK_	Phospho (STY)	sp|Q05519|SRS11_HUMAN	0.999		_RLS(ph)PSAS(ph)PPR_	2 Phospho (STY)	sp|Q8IYB3|SRRM1_HUMAN	0.888
_DVATSPISPTENNT(ph)TPPDALTR_	Phospho (STY)	sp|Q13153|PAK1_HUMAN	0.804		_DYLLS(ph)ESEDEGDNDGERK_	Phospho (STY)	sp|Q9BVJ6|UT14A_HUMAN	0.992		_EAARS(ph)PDKPGGSPS(ph)ASR_	2 Phospho (STY)	sp|Q9Y3T9|NOC2L_HUMAN	0.926		_EEHGGLIRS(ph)PR_	Phospho (STY)	sp|P26368|U2AF2_HUMAN	1		_EELM(ox)SS(ph)DLEETAGSTSIPK_	Oxidation (M),Phospho (STY)	sp|O00567|NOP56_HUMAN	0.829		_EVDEDS(ph)EPEREVR_	Phospho (STY)	sp|Q53GS9|SNUT2_HUMAN	1		_IEDVGS(ph)DEEDDSGKDKK_	Phospho (STY)	sp|P08238|HS90B_HUMAN	0.894		_KRES(ph)ES(ph)ES(ph)DETPPAAPQLIK_	3 Phospho (STY)	sp|O60832|DKC1_HUMAN	0.995		_LPSS(ph)PVYEDAASFK_	Phospho (STY)	sp|Q14247|SRC8_HUMAN	0.989		_RLS(ph)S(ph)LRAS(ph)TSK_	3 Phospho (STY)	sp|P62753|RS6_HUMAN	0.883
_DVDDGS(ph)GS(ph)PHSPHQLSSK_	Phospho (STY)	sp|Q9H4A3|WNK1_HUMAN	0.997		_DYS(ph)PSRNPPEVEAR_	2 Phospho (STY)	sp|Q9HCM7|FBSL_HUMAN	0.974		_EAARS(ph)PDKPGGSPSASR_	Phospho (STY)	sp|Q9Y3T9|NOC2L_HUMAN	1		_EEKCLPPPS(ph)IR_	Phospho (STY)	sp|O15269|SPTC1_HUMAN	1		_EELMS(ph)SDLEETAGSTSIPK_	Phospho (STY)	sp|O00567|NOP56_HUMAN	0.903		_EVDGLLTSEPM(ox)GS(ph)PVSSK_	Oxidation (M),Phospho (STY)	sp|Q8WWM7|ATX2L_HUMAN	1		_IEDVGSDEEDDS(ph)GKDKK_	Phospho (STY)	sp|P08238|HS90B_HUMAN	0.906		_KRES(ph)ES(ph)ESDETPPAAPQLIK_	2 Phospho (STY)	sp|O60832|DKC1_HUMAN	0.914		_LQAALDDEEAGGRPAM(ox)EPGNGS(ph)LDLGGDSAGR_	Oxidation (M),Phospho (STY)	sp|Q00839|HNRPU_HUMAN	0.988		_RNS(ph)S(ph)SPVS(ph)PASVPGQR_	3 Phospho (STY)	sp|Q9H1B7|I2BPL_HUMAN	0.882
_DVDDGSGS(ph)PHS(ph)PHQLSSK_	Oxidation (M),Phospho (STY)	sp|Q9H4A3|WNK1_HUMAN	0.899		_DYS(ph)YER_	Phospho (STY)	sp|P48634|PRC2A_HUMAN	1		_EAASS(ph)PAGEPLRK_	Phospho (STY)	sp|Q96EB6|SIR1_HUMAN	0.978		_EELM(ox)S(ph)S(ph)DLEETAGSTSIPK_	Phospho (STY)	sp|O00567|NOP56_HUMAN	1		_EELMSS(ph)DLEETAGSTSIPK_	Phospho (STY)	sp|O00567|NOP56_HUMAN	0.804		_EVDGLLTSEPMGS(ph)PVSSK_	Phospho (STY)	sp|Q8WWM7|ATX2L_HUMAN	1		_IEEVLSPEGS(ph)PSKS(ph)PSK_	2 Phospho (STY)	sp|Q9UEY8|ADDG_HUMAN	0.986		_KRES(ph)ESESDET(ph)PPAAPQLIK_	2 Phospho (STY)	sp|O60832|DKC1_HUMAN	0.876		_LQQGAGLES(ph)PQGQPEPGAAS(ph)PQR_	2 Phospho (STY)	sp|Q9H6F5|CCD86_HUMAN	1		_RNS(ph)SEASSGDFLDLK_	Phospho (STY)	sp|Q9UK76|HN1_HUMAN	0.984
_DVEDM(ox)ELS(ph)DVEDDGSK_	2 Phospho (STY)	sp|Q5VT52|RPRD2_HUMAN	1		_DYTGCSTSESLS(ph)PVK_	Phospho (STY)	sp|O95297|MPZL1_HUMAN	0.999		_EAASSSSGTQPAPPAPAS(ph)PWDSK_	Phospho (STY)	sp|Q9H7N4|SFR19_HUMAN	0.976		_EELM(ox)S(ph)SDLEETAGSTSIPK_	Phospho (STY)	sp|O00567|NOP56_HUMAN	0.842		_EELQANGSAPAADKEEPAAAGS(ph)GAASPSAAEK_	Phospho (STY)	sp|P29966|MARCS_HUMAN	0.937		_EVLYDS(ph)EGLS(ph)GEER_	2 Phospho (STY)	sp|Q9H7N4|SFR19_HUMAN	0.993		_IEEVLSPEGS(ph)PSKSPSK_	Phospho (STY)	sp|Q9UEY8|ADDG_HUMAN	0.868		_KRS(ph)PS(ph)PS(ph)PTPEAK_	3 Phospho (STY)	sp|Q8TAQ2|SMRC2_HUMAN	0.89		_LQQGAGLESPQGQPEPGAAS(ph)PQR_	Phospho (STY)	sp|Q9H6F5|CCD86_HUMAN	1		_RNS(ph)SS(ph)PVS(ph)PASVPGQR_	3 Phospho (STY)	sp|Q9H1B7|I2BPL_HUMAN	0.973
_DVM(ox)SDETNNEETES(ph)PSQEFVNITK_	Phospho (STY)	sp|P46821|MAP1B_HUMAN	0.906		_EAAEPLSEPKEDQEAAELLS(ph)EPEEESER_	Phospho (STY)	sp|Q63HN8|RN213_HUMAN	0.999		_EAASSSSGTQPAPPAPAS(ph)PWDSKK_	Phospho (STY)	sp|Q9H7N4|SFR19_HUMAN	0.982		_EELMS(ph)S(ph)DLEETAGSTSIPK_	Phospho (STY)	sp|O00567|NOP56_HUMAN	0.999		_EELQANGSAPAADKEEPAAAGSGAAS(ph)PSAAEK_	Phospho (STY)	sp|P29966|MARCS_HUMAN	0.829		_EVPSKEEPS(ph)PVK_	Phospho (STY)	sp|P46821|MAP1B_HUMAN	0.999		_IEEVLSPEGSPSKS(ph)PSK_	Phospho (STY)	sp|Q9UEY8|ADDG_HUMAN	0.998		_KRS(ph)PS(ph)PSPTPEAK_	2 Phospho (STY)	sp|Q8TAQ2|SMRC2_HUMAN	0.978		_LQQQHSEQPPLQPS(ph)PVMTR_	Phospho (STY)	sp|Q5JTV8|TOIP1_HUMAN	0.918		_RNVPQEESLEDS(ph)DVDADFK_	Phospho (STY)	sp|O00505|IMA4_HUMAN	1
_DVPPDILLDS(ph)PERK_	2 Phospho (STY)	sp|Q6KC79|NIPBL_HUMAN	1		_EAALPPVS(ph)PLK_	Phospho (STY)	sp|Q04637|IF4G1_HUMAN	1		_EAASSSSGTQPAPPAPASPWDS(ph)K_	Phospho (STY)	sp|Q9H7N4|SFR19_HUMAN	0.947		_EELMSS(ph)DLEETAGSTSIPK_	Phospho (STY)	sp|O00567|NOP56_HUMAN	0.957		_EELSHS(ph)PEPCTK_	Phospho (STY)	sp|P41229|KDM5C_HUMAN	1		_EVPWS(ph)PSAEK_	Phospho (STY)	sp|Q5JSZ5|PRC2B_HUMAN	0.995		_IES(ph)DEEEDFENVGK_	Phospho (STY)	sp|Q96T23|RSF1_HUMAN	1		_KRS(ph)PSPS(ph)PTPEAK_	2 Phospho (STY)	sp|Q8TAQ2|SMRC2_HUMAN	0.939		_LQQQHSEQPPLQPSPVMT(ph)R_	Phospho (STY)	sp|Q5JTV8|TOIP1_HUMAN	0.964		_RPAEATSS(ph)PT(ph)S(ph)PERPR_	3 Phospho (STY)	sp|Q9BU76|MMTA2_HUMAN	0.815
_DVT(ph)PPPETEVVLIK_	Phospho (STY)	sp|P27816|MAP4_HUMAN	1		_EAANEAGDS(ph)SQDEAEDDVK_	Phospho (STY)	sp|Q9NVU0|RPC5_HUMAN	0.915		_EAAVSASDILQESAIHS(ph)PGTVEK_	Phospho (STY)	sp|Q96C57|CL043_HUMAN	0.865		_EELQANGSAPAADKEEPAAAGS(ph)GAASPSAAEK_	Oxidation (M),Phospho (STY)	sp|P29966|MARCS_HUMAN	0.811		_EENPES(ph)DGEPVVEDGTSVK_	Phospho (STY)	sp|Q13439|GOGA4_HUMAN	1		_EVQAEQPSSSS(ph)PR_	Phospho (STY)	sp|Q9Y388|RBMX2_HUMAN	0.999		_IES(ph)PKLER_	Phospho (STY)	sp|Q92598|HS105_HUMAN	1		_KRSPS(ph)PS(ph)PTPEAK_	2 Phospho (STY)	sp|Q8TAQ2|SMRC2_HUMAN	0.979		_LQSFDS(ph)PERK_	Phospho (STY)	sp|P78332|RBM6_HUMAN	1		_RPAS(ph)PSS(ph)PEHLPATPAESPAQR_	2 Phospho (STY)	sp|Q9H7L9|SDS3_HUMAN	0.809
_DVTLS(ph)PVK_	Phospho (STY)	sp|Q8NFC6|BD1L1_HUMAN	0.948		_EAANEAGDSS(ph)QDEAEDDVK_	Phospho (STY)	sp|Q9NVU0|RPC5_HUMAN	0.969		_EAAVSASDILQESAIHSPGT(ph)VEK_	Phospho (STY)	sp|Q96C57|CL043_HUMAN	0.941		_EELQANGSAPAADKEEPAAAGSGAAS(ph)PSAAEK_	Phospho (STY)	sp|P29966|MARCS_HUMAN	0.872		_EEPLS(ph)EEEPCTSTAIAS(ph)PEK_	2 Phospho (STY)	sp|Q9Y2X3|NOP58_HUMAN	1		_EVS(ph)DDEAEEK_	Phospho (STY)	sp|P07900|HS90A_HUMAN	1		_IET(ph)DEEESCDNAHGDANQPAR_	Phospho (STY)	sp|Q96T23|RSF1_HUMAN	1		_KRSY(ph)S(ph)PDGK_	2 Phospho (STY)	sp|P43243|MATR3_HUMAN	0.92		_LS(ph)QPGQLM(ox)SQPSTASNSLPEPAK_	Oxidation (M),Phospho (STY)	sp|O14920|IKKB_HUMAN	0.996		_RPDHS(ph)GGSPS(ph)PPTSEPAR_	2 Phospho (STY)	sp|Q8TAD8|SNIP1_HUMAN	0.964
_DVTNFTVGGFAPM(ox)S(ph)PR_	Phospho (STY)	sp|O00267|SPT5H_HUMAN	1		_EAARS(ph)PDKPGGS(ph)PSASR_	Phospho (STY)	sp|Q9Y3T9|NOC2L_HUMAN	1		_EADDDEEVDDNIPEM(ox)PS(ph)PK_	Oxidation (M),Phospho (STY)	sp|P26358|DNMT1_HUMAN	1		_EENPES(ph)DGEPVVEDGTSVK_	Phospho (STY)	sp|Q13439|GOGA4_HUMAN	1		_EEPLS(ph)EEEPCTSTAIAS(ph)PEKK_	2 Phospho (STY)	sp|Q9Y2X3|NOP58_HUMAN	0.997		_EVS(ph)DDEAEEKEDK_	Phospho (STY)	sp|P07900|HS90A_HUMAN	1		_IEVKEES(ph)PQS(ph)K_	2 Phospho (STY)	sp|P11171|41_HUMAN	1		_KS(ph)PAKS(ph)PNPS(ph)TPR_	3 Phospho (STY)	sp|O76021|RL1D1_HUMAN	0.954		_LSDDFDS(ph)PVK_	Phospho (STY)	sp|Q96T23|RSF1_HUMAN	1		_RPDHSGGS(ph)PS(ph)PPTSEPAR_	2 Phospho (STY)	sp|Q8TAD8|SNIP1_HUMAN	0.835
_DVYLS(ph)PR_	Phospho (STY)	sp|P38159|RBMX_HUMAN	1		_EAARS(ph)PDKPGGSPS(ph)ASR_	Phospho (STY)	sp|Q9Y3T9|NOC2L_HUMAN	0.83		_EADDDEEVDDNIPEM(ox)PS(ph)PKK_	Oxidation (M),Phospho (STY)	sp|P26358|DNMT1_HUMAN	1		_EEPDSENIPQELLSNLGHPES(ph)PPRK_	Phospho (STY)	sp|Q13309|SKP2_HUMAN	0.999		_EEPLS(ph)EEEPCTSTAIASPEK_	Phospho (STY)	sp|Q9Y2X3|NOP58_HUMAN	1		_EVS(ph)DDEAEEKEDKEEEK_	Phospho (STY)	sp|P07900|HS90A_HUMAN	1		_IEVKEES(ph)PQS(ph)KAETELK_	2 Phospho (STY)	sp|P11171|41_HUMAN	0.999		_KS(ph)PVGKS(ph)PPSTGSTYGSSQK_	2 Phospho (STY)	sp|Q9Y2W1|TR150_HUMAN	1		_LSGLS(ph)FK_	Phospho (STY)	sp|P49006|MRP_HUMAN	1		_RPDPDS(ph)DEDEDYER_	Phospho (STY)	sp|Q96I25|SPF45_HUMAN	1
_DVYLS(ph)PRDDGYSTK_	Phospho (STY)	sp|P38159|RBMX_HUMAN	1		_EAARS(ph)PDKPGGSPSASR_	Phospho (STY)	sp|Q9Y3T9|NOC2L_HUMAN	1		_EADDDEEVDDNIPEMPS(ph)PK_	Phospho (STY)	sp|P26358|DNMT1_HUMAN	1		_EEPLS(ph)EEEPCTSTAIAS(ph)PEK_	Phospho (STY)	sp|Q9Y2X3|NOP58_HUMAN	1		_EEPLSEEEPCTSTAIAS(ph)PEK_	Phospho (STY)	sp|Q9Y2X3|NOP58_HUMAN	1		_EVS(ph)PEVVR_	Phospho (STY)	sp|Q5T200|ZC3HD_HUMAN	1		_IEVKEES(ph)PQSK_	Phospho (STY)	sp|P11171|41_HUMAN	1		_KSLT(ph)YFHR_	Phospho (STY)	sp|Q9P218|COKA1_HUMAN	0.989		_LSHS(ph)DEKPYQCPVCQQR_	Phospho (STY)	sp|P56270|MAZ_HUMAN	0.862		_RPDPDS(ph)DEDEDYERER_	Phospho (STY)	sp|Q96I25|SPF45_HUMAN	1
_DWT(ph)AHREEIAR_	Phospho (STY)	sp|Q5SW79|CE170_HUMAN	1		_EAARSPDKPGGS(ph)PSASR_	Phospho (STY)	sp|Q9Y3T9|NOC2L_HUMAN	0.869		_EADDDEEVDDNIPEMPS(ph)PKK_	Phospho (STY)	sp|P26358|DNMT1_HUMAN	1		_EEPLS(ph)EEEPCTSTAIAS(ph)PEKK_	Oxidation (M),Phospho (STY)	sp|Q9Y2X3|NOP58_HUMAN	0.981		_EEPS(ph)QNDISPK_	Phospho (STY)	sp|Q9NR30|DDX21_HUMAN	0.85		_EVYELLDS(ph)PGK_	Phospho (STY)	sp|P22234|PUR6_HUMAN	1		_IEVKEESPQS(ph)K_	Phospho (STY)	sp|P11171|41_HUMAN	0.874		_KSTYFS(ph)DEEELS(ph)D_	2 Phospho (STY)	sp|Q8TBF4|ZCRB1_HUMAN	1		_LSMEDSKS(ph)PPPK_	Phospho (STY)	sp|Q9NQG5|RPR1B_HUMAN	0.996		_RPDYAPM(ox)ES(ph)S(ph)DEEDEEFQFIKK_	Oxidation (M),2 Phospho (STY)	sp|P55081|MFAP1_HUMAN	1
_DY(ph)PSSRDT(ph)RDYAPPPR_	Phospho (STY)	sp|P38159|RBMX_HUMAN	0.876		_EAASS(ph)PAGEPLRK_	Phospho (STY)	sp|Q96EB6|SIR1_HUMAN	0.834		_EAETKS(ph)PLVS(ph)PSK_	2 Phospho (STY)	sp|P35612|ADDB_HUMAN	0.999		_EEPLS(ph)EEEPCTSTAIASPEK_	Phospho (STY)	sp|Q9Y2X3|NOP58_HUMAN	1		_EEPSQNDIS(ph)PK_	Phospho (STY)	sp|Q9NR30|DDX21_HUMAN	0.993		_EWNGVVSESDS(ph)PVK_	Phospho (STY)	sp|P18858|DNLI1_HUMAN	0.899		_IGEGTY(ph)GVVYK_	Phospho (STY)	sp|P06493|CDK1_HUMAN	0.819		_KTEVVM(ox)NSQQT(ph)PVGT(ph)PK_	Oxidation (M),2 Phospho (STY)	sp|O75781|PALM_HUMAN	1		_LSQSSQDSS(ph)PVR_	Phospho (STY)	sp|O95251|KAT7_HUMAN	0.999		_RPES(ph)PSEIS(ph)PIK_	2 Phospho (STY)	sp|Q7Z5K2|WAPL_HUMAN	0.992
_DYDDM(ox)S(ph)PR_	Phospho (STY)	sp|P61978|HNRPK_HUMAN	1		_EAASSSSGTQPAPPAPAS(ph)PWDSK_	Phospho (STY)	sp|Q9H7N4|SFR19_HUMAN	0.999		_EAGS(ph)PAQEFK_	Phospho (STY)	sp|Q5JSZ5|PRC2B_HUMAN	1		_EEPLSEEEPCTSTAIAS(ph)PEK_	Phospho (STY)	sp|Q9Y2X3|NOP58_HUMAN	1		_EEPVS(ph)S(ph)GPEEAVGK_	2 Phospho (STY)	sp|O00567|NOP56_HUMAN	1		_EYAENIGDGRS(ph)PEFRENEQK_	Phospho (STY)	sp|Q8WYA6|CTBL1_HUMAN	1		_IHIDPEIQDGS(ph)PTTSR_	Phospho (STY)	sp|P50479|PDLI4_HUMAN	0.96		_KVARMGFNAS(ph)S(ph)M(ox)LR_	Oxidation (M),2 Phospho (STY)	sp|Q3SXM0|DC4L1_HUMAN	1		_LSS(ph)PVLHR_	Phospho (STY)	sp|Q16643|DREB_HUMAN	1		_RPGTQGHLGPEKEEEES(ph)DGEPEDSSTS_	Phospho (STY)	sp|Q8IYB7|DI3L2_HUMAN	0.989
_DYDDMS(ph)PR_	Phospho (STY)	sp|P61978|HNRPK_HUMAN	1		_EAASSSSGTQPAPPAPAS(ph)PWDSKK_	2 Phospho (STY)	sp|Q9H7N4|SFR19_HUMAN	0.95		_EAKPGAAEPEVGVPSSLSPS(ph)SPSSSWTETDVEER_	Phospho (STY)	sp|Q6L8Q7|PDE12_HUMAN	0.873		_EEPSQNDIS(ph)PK_	Phospho (STY)	sp|Q9NR30|DDX21_HUMAN	1		_EEPVSS(ph)GPEEAVGK_	Phospho (STY)	sp|O00567|NOP56_HUMAN	0.999		_EYIPGQPPLSQSSDSS(ph)PTR_	Phospho (STY)	sp|P07814|SYEP_HUMAN	0.918		_IHNVGS(ph)PLK_	Phospho (STY)	sp|P52701|MSH6_HUMAN	1		_KVEEDLKADEPS(ph)S(ph)EES(ph)DLEIDK_	3 Phospho (STY)	sp|P50502|F10A1_HUMAN	1		_LSVGEQPDVTHDPYEFLQS(ph)PEPAASAK_	Phospho (STY)	sp|Q9H8M2|BRD9_HUMAN	1		_RPM(ox)EEDGEEKS(ph)PSK_	Oxidation (M),Phospho (STY)	sp|Q12906|ILF3_HUMAN	0.999
_DYDEEEQGYDS(ph)EKEK_	Phospho (STY)	sp|Q05519|SRS11_HUMAN	1		_EADDDEEVDDNIPEM(ox)PS(ph)PK_	2 Phospho (STY)	sp|P26358|DNMT1_HUMAN	1		_EALAEAALES(ph)PRPALVR_	Phospho (STY)	sp|O14745|NHRF1_HUMAN	1		_EEPVSS(ph)GPEEAVGK_	Phospho (STY)	sp|O00567|NOP56_HUMAN	0.993		_EERSPQT(ph)LAPVGEDAM(ox)K_	Oxidation (M),Phospho (STY)	sp|Q92797|SYMPK_HUMAN	0.938		_EYVSNDAAQS(ph)DDEEK_	Phospho (STY)	sp|Q5JSH3|WDR44_HUMAN	1		_IHRAS(ph)DPGLPAEEPK_	Phospho (STY)	sp|P27708|PYR1_HUMAN	1		_KVEEDLKADEPS(ph)S(ph)EESDLEIDK_	2 Phospho (STY)	sp|P50502|F10A1_HUMAN	0.958		_LT(ph)T(ph)AQEVLAR_	2 Phospho (STY)	sp|Q9H211|CDT1_HUMAN	1		_RPMEEDGEEKS(ph)PSK_	Phospho (STY)	sp|Q12906|ILF3_HUMAN	0.985
_DYDS(ph)PERER_	Phospho (STY)	sp|P52756|RBM5_HUMAN	1		_EADDDEEVDDNIPEM(ox)PS(ph)PKK_	Phospho (STY)	sp|P26358|DNMT1_HUMAN	1		_EAQQKVPDEEENEES(ph)DNEKETEK_	Phospho (STY)	sp|P11388|TOP2A_HUMAN	1		_EERS(ph)PQTLAPVGEDAM(ox)K_	Oxidation (M),Phospho (STY)	sp|Q92797|SYMPK_HUMAN	0.999		_EES(ph)DGEYDEFGR_	Phospho (STY)	sp|O95218|ZRAB2_HUMAN	1		_FAS(ph)DDEHDEHDENGATGPVK_	Phospho (STY)	sp|P05455|LA_HUMAN	1		_IKEEPVS(ph)EEGEEDEEQEAEEEPM(ox)DTSPSGLHSK_	Oxidation (M),Phospho (STY)	sp|Q9NVU0|RPC5_HUMAN	1		_KVEEDLKADEPSS(ph)EES(ph)DLEIDK_	2 Phospho (STY)	sp|P50502|F10A1_HUMAN	0.906		_LTPSPDIIVLSDNEASS(ph)PR_	Phospho (STY)	sp|Q8WXI9|P66B_HUMAN	0.878		_RPNEDS(ph)DEDEEK_	Phospho (STY)	sp|Q12996|CSTF3_HUMAN	1
_DYEIESQNPLAS(ph)PTNTLLGSAK_	Phospho (STY)	sp|Q7Z417|NUFP2_HUMAN	0.984		_EADDDEEVDDNIPEMPS(ph)PK_	2 Phospho (STY)	sp|P26358|DNMT1_HUMAN	1		_EAQSSQATPVQTSQPDSSNIVKVS(ph)PR_	Phospho (STY)	sp|Q8IZH2|XRN1_HUMAN	0.983		_EES(ph)DGEYDEFGR_	Phospho (STY)	sp|O95218|ZRAB2_HUMAN	1		_EES(ph)DGEYDEFGRK_	Phospho (STY)	sp|O95218|ZRAB2_HUMAN	1		_FDIYDPFHPTDEAYS(ph)PPPAPEQK_	Phospho (STY)	sp|Q9H7N4|SFR19_HUMAN	1		_IKWDEQTSNTKGDDDEES(ph)DEEAVK_	Phospho (STY)	sp|O43395|PRPF3_HUMAN	0.992		_KVEEEQEADEEDVS(ph)EEEAESK_	Phospho (STY)	sp|Q9H3N1|TMX1_HUMAN	1		_LTVENS(ph)PKQEAGISEGQGTAGEEEEK_	Phospho (STY)	sp|O43583|DENR_HUMAN	0.996		_RPNKQEES(ph)ES(ph)PVERPLK_	2 Phospho (STY)	sp|Q96SB4|SRPK1_HUMAN	1
_DYGHS(ph)SSRDDYPSR_	Phospho (STY)	sp|P38159|RBMX_HUMAN	0.979		_EADDDEEVDDNIPEMPS(ph)PKK_	Phospho (STY)	sp|P26358|DNMT1_HUMAN	1		_EAS(ph)PAPLAQGEPGREDLPTR_	Phospho (STY)	sp|Q9P1Y6|PHRF1_HUMAN	1		_EES(ph)EES(ph)EAEPVQR_	Phospho (STY)	sp|Q9BW71|HIRP3_HUMAN	1		_EES(ph)EES(ph)EAEPVQR_	2 Phospho (STY)	sp|Q9BW71|HIRP3_HUMAN	1		_FDQLFDDES(ph)DPFEVLK_	Phospho (STY)	sp|Q8NC51|PAIRB_HUMAN	1		_ILKEMCDVEQVLS(ph)K_	Phospho (STY)	sp|O95239|KIF4A_HUMAN	1		_KVELS(ph)ES(ph)EEDK_	2 Phospho (STY)	sp|Q8IYB3|SRRM1_HUMAN	1		_LVEQANS(ph)PK_	Phospho (STY)	sp|O95391|SLU7_HUMAN	1		_RPPKS(ph)PEEEGQM(ox)S(ph)S_	Oxidation (M),2 Phospho (STY)	sp|Q9BRL6|SRSF8_HUMAN	0.948
_DYLLS(ph)ESEDEGDNDGERK_	Phospho (STY)	sp|Q9BVJ6|UT14A_HUMAN	1		_EAEFS(ph)DPENTR_	2 Phospho (STY)	sp|Q5T481|RBM20_HUMAN	1		_EASRPPEEPSAPS(ph)PTLPAQFK_	Phospho (STY)	sp|Q9H3P2|NELFA_HUMAN	0.889		_EES(ph)EESEAEPVQR_	2 Phospho (STY)	sp|Q9BW71|HIRP3_HUMAN	1		_EES(ph)EESEAEPVQR_	Phospho (STY)	sp|Q9BW71|HIRP3_HUMAN	1		_FEEESKEPVADEEEEDS(ph)DDDVEPITEFR_	Phospho (STY)	sp|P54105|ICLN_HUMAN	1		_ILKS(ph)PEIQR_	Phospho (STY)	sp|P36578|RL4_HUMAN	1		_KVELS(ph)ES(ph)EEDKGGK_	2 Phospho (STY)	sp|Q8IYB3|SRRM1_HUMAN	1		_LVHVAVEM(ox)S(ph)LKLQSVEY(ph)VVFDEADR_	Oxidation (M),2 Phospho (STY)	sp|Q8TDD1|DDX54_HUMAN	0.983		_RPPS(ph)PDVIVLS(ph)DNEQPSS(ph)PR_	3 Phospho (STY)	sp|Q86YP4|P66A_HUMAN	0.994
_DYLLSES(ph)EDEGDNDGERK_	Phospho (STY)	sp|Q9BVJ6|UT14A_HUMAN	0.967		_EAGLS(ph)QSHDDLSNATATPSVR_	Phospho (STY)	sp|O14523|C2C2L_HUMAN	0.838		_EATAQKPTGSVGSTVTT(ph)PPPLVR_	Phospho (STY)	sp|Q86YP4|P66A_HUMAN	0.847		_EESSELEQPFAQDTSS(ph)VGPDR_	Phospho (STY)	sp|Q15424|SAFB1_HUMAN	0.982		_EESSELEQPFAQDTSS(ph)VGPDR_	Phospho (STY)	sp|Q15424|SAFB1_HUMAN	0.927		_FEPES(ph)PGFESR_	Phospho (STY)	sp|Q9H5H4|ZN768_HUMAN	1		_ILVPKS(ph)PVK_	Phospho (STY)	sp|Q9Y232|CDYL1_HUMAN	1		_KVLS(ph)DS(ph)EDEEK_	2 Phospho (STY)	sp|Q8WWQ0|PHIP_HUMAN	1		_LVREDENDAS(ph)DDEDDDEK_	Phospho (STY)	sp|Q9Y5B6|PAXB1_HUMAN	1		_RPQS(ph)PGAS(ph)PSQAER_	2 Phospho (STY)	sp|Q96T58|MINT_HUMAN	0.994
_DYTGCSTSESLS(ph)PVK_	Phospho (STY)	sp|O95297|MPZL1_HUMAN	0.986		_EAGS(ph)PAQEFK_	Oxidation (M),Phospho (STY)	sp|Q5JSZ5|PRC2B_HUMAN	1		_EATNTTSEPSAPSQDLLDLSPS(ph)PR_	Phospho (STY)	sp|O75674|TM1L1_HUMAN	0.99		_EETNGPSNQKPVKS(ph)PDNSIK_	Phospho (STY)	sp|Q9UKL0|RCOR1_HUMAN	0.912		_EETNGPSNQKPVKS(ph)PDNSIK_	Phospho (STY)	sp|Q9UKL0|RCOR1_HUMAN	0.98		_FGIHVYQFPECDS(ph)DEDEDFKQQDR_	Phospho (STY)	sp|Q99719|SEPT5_HUMAN	1		_ILVT(ph)S(ph)FNHM(ox)PK_	Oxidation (M),2 Phospho (STY)	sp|O75094|SLIT3_HUMAN	1		_KVVVS(ph)PTK_	Phospho (STY)	sp|P19338|NUCL_HUMAN	0.868		_LVSFHDDS(ph)DEDLLHI_	Phospho (STY)	sp|P11717|MPRI_HUMAN	1		_RPQS(ph)PGAS(ph)PSQAERLPS(ph)DSER_	3 Phospho (STY)	sp|Q96T58|MINT_HUMAN	0.939
_EAAEPLSEPKEDQEAAELLS(ph)EPEEESER_	2 Phospho (STY)	sp|Q63HN8|RN213_HUMAN	0.998		_EALAEAALES(ph)PRPALVR_	Phospho (STY)	sp|O14745|NHRF1_HUMAN	1		_ECINAAPDS(ph)PSK_	Phospho (STY)	sp|Q7Z569|BRAP_HUMAN	0.849		_EFITGDVEPTDAESEWHS(ph)ENEEEEK_	Phospho (STY)	sp|Q99733|NP1L4_HUMAN	0.999		_EFGYDSPHDLDS(ph)D_	Phospho (STY)	sp|Q96CW6|S7A6O_HUMAN	1		_FGQAATM(ox)EGIGAIGGT(ph)PPAFNR_	Oxidation (M),Phospho (STY)	sp|Q15233|NONO_HUMAN	1		_INSFS(ph)PQKPPGHCSR_	Phospho (STY)	sp|Q9BX63|FANCJ_HUMAN	0.951		_KVVVS(ph)PTKK_	Phospho (STY)	sp|P19338|NUCL_HUMAN	0.982		_M(ox)AEY(ph)LDSSRVEVWEK_	Oxidation (M),Phospho (STY)	sp|Q86XD8|ZFAN4_HUMAN	0.94		_RPS(ph)ES(ph)DKEDELDK_	2 Phospho (STY)	sp|Q02952|AKA12_HUMAN	1
_EAAGPAPS(ph)PM(ox)R_	Phospho (STY)	sp|Q12834|CDC20_HUMAN	1		_EAQQKVPDEEENEES(ph)DNEKETEK_	Phospho (STY)	sp|P11388|TOP2A_HUMAN	0.998		_ECINAAPDSPS(ph)K_	Phospho (STY)	sp|Q7Z569|BRAP_HUMAN	0.897		_EGAAS(ph)PAPETPQPTSPETSPK_	Oxidation (M),Phospho (STY)	sp|Q9Y3X0|CCDC9_HUMAN	0.995		_EFITGDVEPTDAESEWHS(ph)ENEEEEK_	Phospho (STY)	sp|Q99733|NP1L4_HUMAN	1		_FGQAATMEGIGAIGGT(ph)PPAFNR_	Phospho (STY)	sp|Q15233|NONO_HUMAN	1		_IS(ph)DS(ph)ESEDPPR_	2 Phospho (STY)	sp|Q96ST2|IWS1_HUMAN	0.998		_KVVVSPT(ph)K_	Phospho (STY)	sp|P19338|NUCL_HUMAN	0.963		_M(ox)ALPPQEDATAS(ph)PPR_	Oxidation (M),Phospho (STY)	sp|Q9UQ35|SRRM2_HUMAN	0.973		_RPTETNPVTS(ph)NS(ph)DEECNETVK_	2 Phospho (STY)	sp|P46100|ATRX_HUMAN	0.973
_EAALPPVS(ph)PLK_	2 Phospho (STY)	sp|Q04637|IF4G1_HUMAN	1		_EAQSSQATPVQTSQPDSSNIVKVS(ph)PR_	Phospho (STY)	sp|Q8IZH2|XRN1_HUMAN	0.999		_EDAEGVAAEEEQEGDS(ph)GEQETGATDARPR_	Phospho (STY)	sp|Q96KC8|DNJC1_HUMAN	0.988		_EGEEPTVYS(ph)DEEEPK_	Phospho (STY)	sp|O00264|PGRC1_HUMAN	0.999		_EGAASPAPETPQPT(ph)SPETSPK_	Phospho (STY)	sp|Q9Y3X0|CCDC9_HUMAN	0.916		_FHS(ph)PSTTWS(ph)PNK_	2 Phospho (STY)	sp|Q99590|SCAFB_HUMAN	0.995		_ITPPAAKPGS(ph)PQAK_	Phospho (STY)	sp|P35658|NU214_HUMAN	1		_KWDGS(ph)EEDEDNSK_	Phospho (STY)	sp|O60841|IF2P_HUMAN	1		_M(ox)DS(ph)FDEDLARPSGLLAQER_	Oxidation (M),Phospho (STY)	sp|Q9Y2W1|TR150_HUMAN	1		_RPTETNPVTSNS(ph)DEECNETVK_	Phospho (STY)	sp|P46100|ATRX_HUMAN	0.946
_EAANEAGDS(ph)SQDEAEDDVK_	2 Phospho (STY)	sp|Q9NVU0|RPC5_HUMAN	0.916		_EARNS(ph)VCIIPLR_	2 Phospho (STY)	sp|O43818|U3IP2_HUMAN	1		_EDALDDSVSSSSVHASPLASS(ph)PVRK_	Phospho (STY)	sp|P49792|RBP2_HUMAN	0.808		_EGEEPTVYS(ph)DEEEPKDESAR_	Phospho (STY)	sp|O00264|PGRC1_HUMAN	1		_EGALSRVS(ph)DES(ph)LSK_	2 Phospho (STY)	sp|Q08357|S20A2_HUMAN	1		_FHS(ph)PSTTWS(ph)PNKDTPQEK_	2 Phospho (STY)	sp|Q99590|SCAFB_HUMAN	0.918		_IYHLPDAES(ph)DEDEDFK_	Phospho (STY)	sp|Q15019|SEPT2_HUMAN	1		_KYES(ph)DEDS(ph)LGSSGR_	2 Phospho (STY)	sp|O00418|EF2K_HUMAN	0.98		_M(ox)GQAPSQSLLPPAQDQPRS(ph)PVPSAFSDQSR_	Oxidation (M),Phospho (STY)	sp|Q9UQ35|SRRM2_HUMAN	0.99		_RQINYKEDS(ph)ES(ph)DGS(ph)QK_	3 Phospho (STY)	sp|Q96T23|RSF1_HUMAN	1
_EAARS(ph)PDKPGGS(ph)PSASR_	Phospho (STY)	sp|Q9Y3T9|NOC2L_HUMAN	1		_EAS(ph)PAPLAQGEPGREDLPTR_	Phospho (STY)	sp|Q9P1Y6|PHRF1_HUMAN	1		_EDDDVIVNKPHVS(ph)DEEEEEPPFYHHPFK_	Phospho (STY)	sp|P18583|SON_HUMAN	0.998		_EGEEPTVYS(ph)DEEEPKDESARK_	Phospho (STY)	sp|O00264|PGRC1_HUMAN	0.957		_EGDPVSLSTPLETEFGSPSELS(ph)PR_	Phospho (STY)	sp|Q9BUR4|WAP53_HUMAN	0.839		_FIHQQPQSSS(ph)PVYGSSAK_	Phospho (STY)	sp|P49023|PAXI_HUMAN	0.822		_IYHLPDAES(ph)DEDEDFKEQTR_	Phospho (STY)	sp|Q15019|SEPT2_HUMAN	1		_KYVIS(ph)DEEEEDDD_	Phospho (STY)	sp|Q8WVC0|LEO1_HUMAN	1		_M(ox)LPHAPGVQM(ox)QAIPEDAIPEES(ph)GDEDEDDPDKR_	2 Oxidation (M),Phospho (STY)	sp|Q13547|HDAC1_HUMAN	1		_RQS(ph)PS(ph)PSTRPIR_	2 Phospho (STY)	sp|Q8IYB3|SRRM1_HUMAN	0.991
_EAARS(ph)PDKPGGSPSASR_	Phospho (STY)	sp|Q9Y3T9|NOC2L_HUMAN	1		_EASRPPEEPSAPS(ph)PTLPAQFK_	Phospho (STY)	sp|Q9H3P2|NELFA_HUMAN	0.948		_EDEIS(ph)PPPPNPVVK_	Phospho (STY)	sp|P10644|KAP0_HUMAN	1		_EGES(ph)PAAGPPPQELVEEEPSAPPTLLEEETEDGSDK_	Phospho (STY)	sp|Q8IZL8|PELP1_HUMAN	1		_EGEAAGGDHETESTS(ph)DKETDIDDR_	Phospho (STY)	sp|Q92903|CDS1_HUMAN	0.862		_FIIGSVSEDNS(ph)EDEISNLVK_	Phospho (STY)	sp|Q13085|ACACA_HUMAN	0.998		_KAAS(ph)PS(ph)PQSVR_	2 Phospho (STY)	sp|Q8IYB3|SRRM1_HUMAN	1		_LAEDEGDS(ph)EPEAVGQSR_	Phospho (STY)	sp|Q9UIG0|BAZ1B_HUMAN	1		_M(ox)LPHAPGVQM(ox)QAIPEDAVHEDS(ph)GDEDGEDPDK_	2 Oxidation (M),Phospho (STY)	sp|Q92769|HDAC2_HUMAN	1		_RQS(ph)VS(ph)PPYK_	2 Phospho (STY)	sp|Q9NYV4|CDK12_HUMAN	0.999
_EAASS(ph)PAGEPLRK_	Phospho (STY)	sp|Q96EB6|SIR1_HUMAN	0.945		_EATDMGS(ph)VWYEEQR_	Phospho (STY)	sp|Q8N8K9|K1958_HUMAN	1		_EDILENEDEQNS(ph)PPKK_	Phospho (STY)	sp|Q9NTI5|PDS5B_HUMAN	1		_EGETQGVAFEHESPADFQNSQS(ph)PVQDQDK_	Phospho (STY)	sp|P78332|RBM6_HUMAN	0.995		_EGEEPTVYS(ph)DEEEPK_	Phospho (STY)	sp|O00264|PGRC1_HUMAN	1		_FIT(ph)ANQYEM(ox)V_	Oxidation (M),Phospho (STY)	sp|P41732|TSN7_HUMAN	1		_KAAS(ph)PSPQSVR_	Phospho (STY)	sp|Q8IYB3|SRRM1_HUMAN	0.997		_LAIQGPEDS(ph)PSR_	Phospho (STY)	sp|Q15773|MLF2_HUMAN	0.974		_M(ox)LPHAPGVQM(ox)QAIPEDAVHEDS(ph)GDEDGEDPDKR_	2 Oxidation (M),Phospho (STY)	sp|Q92769|HDAC2_HUMAN	1		_RRAS(ph)PS(ph)PPPK_	2 Phospho (STY)	sp|Q8IYB3|SRRM1_HUMAN	1
_EAASSSSGTQPAPPAPAS(ph)PWDSK_	2 Phospho (STY)	sp|Q9H7N4|SFR19_HUMAN	0.996		_ECINAAPDS(ph)PSK_	Phospho (STY)	sp|Q7Z569|BRAP_HUMAN	0.995		_EDKSPETGT(ph)AGGSSTASYSAGR_	Phospho (STY)	sp|Q8NFC6|BD1L1_HUMAN	0.81		_EGGSKS(ph)DSEDITR_	Phospho (STY)	sp|O00470|MEIS1_HUMAN	0.982		_EGEEPTVYS(ph)DEEEPKDESAR_	Phospho (STY)	sp|O00264|PGRC1_HUMAN	1		_FLENGS(ph)QEDLLHGNPGSTYLASNSTSAPNWK_	Phospho (STY)	sp|Q7Z2W4|ZCCHV_HUMAN	1		_KADRDQS(ph)PFSK_	Phospho (STY)	sp|Q13427|PPIG_HUMAN	0.949		_LAPVPS(ph)PEPQKPAPVS(ph)PESVK_	2 Phospho (STY)	sp|Q96JM3|CHAP1_HUMAN	0.991		_M(ox)LPHAPGVQMQAIPEDAIPEES(ph)GDEDEDDPDK_	Oxidation (M),Phospho (STY)	sp|Q13547|HDAC1_HUMAN	1		_RREEGPPPPS(ph)PDGAS(ph)S(ph)DAEPEPPSGR_	3 Phospho (STY)	sp|Q9NTJ3|SMC4_HUMAN	0.999
_EAASSSSGTQPAPPAPAS(ph)PWDSKK_	Oxidation (M),Phospho (STY)	sp|Q9H7N4|SFR19_HUMAN	0.99		_ECINAAPDSPS(ph)K_	Oxidation (M),Phospho (STY)	sp|Q7Z569|BRAP_HUMAN	0.954		_EDLCT(ph)KT(ph)ENLLGSY(ph)FPKK_	3 Phospho (STY)	sp|Q06323|PSME1_HUMAN	0.955		_EGKPEIEGKPES(ph)EGEPGSETR_	Phospho (STY)	sp|Q96EI5|TCAL4_HUMAN	1		_EGEEPTVYS(ph)DEEEPKDESARK_	Phospho (STY)	sp|O00264|PGRC1_HUMAN	0.991		_FLES(ph)PSR_	Phospho (STY)	sp|Q9ULM3|YETS2_HUMAN	0.999		_KADRDQSPFS(ph)K_	Phospho (STY)	sp|Q13427|PPIG_HUMAN	0.99		_LAS(ph)PM(ox)KPVPGT(ph)PPSSK_	Oxidation (M),2 Phospho (STY)	sp|Q15648|MED1_HUMAN	0.905		_M(ox)LPHAPGVQMQAIPEDAIPEES(ph)GDEDEDDPDKR_	Oxidation (M),Phospho (STY)	sp|Q13547|HDAC1_HUMAN	1		_RRS(ph)FS(ph)IS(ph)PSR_	3 Phospho (STY)	sp|P18583|SON_HUMAN	0.996
_EAAVSASDILQES(ph)AIHSPGTVEK_	Phospho (STY)	sp|Q96C57|CL043_HUMAN	0.854		_EDAEGVAAEEEQEGDS(ph)GEQETGATDARPR_	Phospho (STY)	sp|Q96KC8|DNJC1_HUMAN	0.868		_EDLPAENGETKTEES(ph)PASDEAGEK_	Phospho (STY)	sp|P05114|HMGN1_HUMAN	0.972		_EGNTTEDDFPSS(ph)PGNGNK_	Phospho (STY)	sp|Q15007|FL2D_HUMAN	1		_EGES(ph)PAAGPPPQELVEEEPSAPPTLLEEETEDGSDK_	Phospho (STY)	sp|Q8IZL8|PELP1_HUMAN	1		_FLESAAADFS(ph)DEDEDDDVDGREK_	Phospho (STY)	sp|O43815|STRN_HUMAN	1		_KAEDS(ph)DS(ph)EPEPEDNVR_	2 Phospho (STY)	sp|Q9H0D6|XRN2_HUMAN	1		_LCS(ph)PLS(ph)EPGDPSK_	2 Phospho (STY)	sp|Q5VUA4|ZN318_HUMAN	0.988		_M(ox)LPHAPGVQMQAIPEDAVHEDS(ph)GDEDGEDPDK_	Oxidation (M),Phospho (STY)	sp|Q92769|HDAC2_HUMAN	1		_RRS(ph)FS(ph)IS(ph)PVR_	3 Phospho (STY)	sp|P18583|SON_HUMAN	1
_EAAVSASDILQESAIHS(ph)PGTVEK_	Phospho (STY)	sp|Q96C57|CL043_HUMAN	0.991		_EDALDDSVSSSSVHASPLASS(ph)PVRK_	Phospho (STY)	sp|P49792|RBP2_HUMAN	0.967		_EDLPAENGETKTEESPAS(ph)DEAGEK_	Phospho (STY)	sp|P05114|HMGN1_HUMAN	1		_EGPDLDRPGS(ph)DR_	Phospho (STY)	sp|Q7Z4V5|HDGR2_HUMAN	1		_EGETQGVAFEHESPADFQNSQS(ph)PVQDQDK_	Phospho (STY)	sp|P78332|RBM6_HUMAN	0.98		_FLMECRNS(ph)PVTK_	Phospho (STY)	sp|Q13541|4EBP1_HUMAN	1		_KAEGEPQEES(ph)PLK_	Phospho (STY)	sp|Q9NYF8|BCLF1_HUMAN	1		_LDQPVS(ph)APPS(ph)PR_	2 Phospho (STY)	sp|Q16204|CCDC6_HUMAN	1		_M(ox)LPHAPGVQMQAIPEDAVHEDS(ph)GDEDGEDPDKR_	Oxidation (M),Phospho (STY)	sp|Q92769|HDAC2_HUMAN	1		_RRS(ph)FS(ph)ISPS(ph)R_	3 Phospho (STY)	sp|P18583|SON_HUMAN	0.894
_EADDDEEVDDNIPEM(ox)PS(ph)PK_	Phospho (STY)	sp|P26358|DNMT1_HUMAN	1		_EDDDVIVNKPHVS(ph)DEEEEEPPFYHHPFK_	2 Phospho (STY)	sp|P18583|SON_HUMAN	1		_EDLPNS(ph)ST(ph)S(ph)FLFDK_	3 Phospho (STY)	sp|Q8NFP9|NBEA_HUMAN	0.839		_EGPEPPEEVPPPT(ph)TPPVPK_	2 Phospho (STY)	sp|P48634|PRC2A_HUMAN	0.889		_EGGSKS(ph)DSEDITR_	Phospho (STY)	sp|O00470|MEIS1_HUMAN	0.928		_FNGIT(ph)EKEY(ph)KTY(ph)K_	3 Phospho (STY)	sp|Q53GS9|SNUT2_HUMAN	0.956		_KAEPSEVDM(ox)NS(ph)PK_	Oxidation (M),Phospho (STY)	sp|Q9NR30|DDX21_HUMAN	1		_LDSQPQETS(ph)PELPR_	Phospho (STY)	sp|O14545|TRAD1_HUMAN	0.955		_M(ox)LQWLAT(ph)KSPK_	Oxidation (M),Phospho (STY)	sp|Q96FZ2|HMCES_HUMAN	0.958		_RRS(ph)PS(ph)LSSK_	2 Phospho (STY)	sp|Q8IYB3|SRRM1_HUMAN	0.966
_EADDDEEVDDNIPEM(ox)PS(ph)PKK_	2 Phospho (STY)	sp|P26358|DNMT1_HUMAN	1		_EDILENEDEQNS(ph)PPKK_	Phospho (STY)	sp|Q9NTI5|PDS5B_HUMAN	1		_EDLSPAFDHS(ph)PNK_	Phospho (STY)	sp|P17706|PTN2_HUMAN	1		_EGPEPPEEVPPPTT(ph)PPVPK_	Phospho (STY)	sp|P48634|PRC2A_HUMAN	0.982		_EGGSKSDS(ph)EDITR_	Phospho (STY)	sp|O00470|MEIS1_HUMAN	0.927		_FNGITEKEY(ph)KT(ph)Y(ph)K_	3 Phospho (STY)	sp|Q53GS9|SNUT2_HUMAN	0.997		_KAEPSEVDMNS(ph)PK_	Phospho (STY)	sp|Q9NR30|DDX21_HUMAN	1		_LDSS(ph)PSVSSTLAAK_	Phospho (STY)	sp|Q13428|TCOF_HUMAN	0.921		_M(ox)PQDGS(ph)DDEDEEWPTLEK_	Oxidation (M),Phospho (STY)	sp|Q13895|BYST_HUMAN	1		_RRS(ph)PS(ph)PAPPPR_	2 Phospho (STY)	sp|Q8IYB3|SRRM1_HUMAN	1
_EAEFS(ph)DPENTR_	Phospho (STY)	sp|Q5T481|RBM20_HUMAN	1		_EDLPAENGETKTEESPAS(ph)DEAGEK_	Phospho (STY)	sp|P05114|HMGN1_HUMAN	0.997		_EDPQARPLEGSSSEDSPPEGQAPPSHS(ph)PR_	Phospho (STY)	sp|Q12789|TF3C1_HUMAN	0.98		_EGPGEEHFEDMAS(ph)DEDM(ox)KPK_	Phospho (STY)	sp|Q99856|ARI3A_HUMAN	1		_EGHGSSS(ph)FDRELER_	Phospho (STY)	sp|Q5VTL8|PR38B_HUMAN	0.951		_FPPEDFRHS(ph)PEDFR_	Phospho (STY)	sp|Q8IXT5|RB12B_HUMAN	1		_KAES(ph)PVKEEAVAEVVTITK_	Phospho (STY)	sp|P07197|NFM_HUMAN	1		_LEDSEVRS(ph)VAS(ph)NQSEM(ox)EFSSLQDM(ox)PK_	2 Oxidation (M),2 Phospho (STY)	sp|Q8N163|CCAR2_HUMAN	0.981		_M(ox)PSPFRSS(ph)ALM(ox)GMCGS(ph)R_	2 Oxidation (M),2 Phospho (STY)	sp|P28290|SSFA2_HUMAN	0.915		_RRS(ph)PS(ph)PYYSR_	2 Phospho (STY)	sp|Q13595|TRA2A_HUMAN	1
[truncated: 3,175 more rows]
[truncated: 4 more columns]
