# Supplementary material for: Insights into chemoselectivity principles in metal oxide affinity chromatography using tailored nanocast metal oxide microspheres and mass spectrometry-based phosphoproteomics
Source: Royal Society of Chemistry journal article supplement (doi:10.1039/c7an00570a), 2017-01-01
Supplement: c7an00570a4.xlsx [file c7an00570a4.xlsx]

## Sheet: Table S4
ESI Table S4. Quantitation of selected phosphopeptides with common sequence, but different numbers of phosphorylation sites. Average peak areas as reported by MaxQuant are shown.
Only identifications with at least one identification with confident site localization for a given material/condition are listed.
		Material >>>		Zr+	TSP+	In+	Ti+	Fe+	Ni-	Sn+	Ni+	Sn-	Co+	Co-
AASPSPQSVR (from Serine/arginine repetitive matrix protein 1)
_AAS(ph)PS(ph)PQS(ph)VR_			3P								75759.5		45372.5
_AAS(ph)PS(ph)PQSVR_			2P	1763600	2.56283e+06	3.31147e+06	2.03877e+06	3.57748e+06	1.26858e+06	594317	1.47939e+06	1.06072e+06	759215	1.05628e+06
_AAS(ph)PSPQSVR_			1P	7566600	3512800	4.99962e+06	4.59632e+06	2.45353e+06	1.75678e+06	296460	106978	2501120	24112.5
GGDSIGETPTPGASK (from A49)
_GGDSIGET(ph)PT(ph)PGAS(ph)K_			3P								29368.5		32482
_GGDSIGET(ph)PT(ph)PGASK_			2P	375615	388928	459385	385592	441448		74187.5	158332		108205
_GGDSIGET(ph)PTPGASK_			1P	10729890	9017600	16650000	14303250		6774800
GPTTGEGALDLSDVHSPPKSPEGK (from FGFR1 oncogene partner)
_GPTTGEGALDLS(ph)DVHS(ph)PPKS(ph)PEGK_			3P					79479
_GPTTGEGALDLSDVHS(ph)PPKS(ph)PEGK_			2P	835858	875467	1077498	844537	952193	703773	110155	283495	425280	100932
_GPTTGEGALDLSDVHS(ph)PPKSPEGK_			1P	131460
GTEPSPGGTPQPSRPVSPAGPPEGVPEEAQPPR (from B-cell CLL/lymphoma 7 protein family member C)
_GTEPS(ph)PGGT(ph)PQPSRPVS(ph)PAGPPEGVPEEAQPPR_			3P					126400
_GTEPS(ph)PGGTPQPSRPVS(ph)PAGPPEGVPEEAQPPR_			2P		221575		278580
_GTEPSPGGT(ph)PQPSRPVS(ph)PAGPPEGVPEEAQPPR_			2P		133540	196565		140900
_GTEPSPGGTPQPSRPVS(ph)PAGPPEGVPEEAQPPR_			1P	909953	222652	712427	805567	166734	263770			578753		692973
KAASPSPQSVR (from Serine/arginine repetitive matrix protein 1)
_KAAS(ph)PS(ph)PQS(ph)VR_			3P	123101	139157	222630		182212			96066.7		91894.2
_KAAS(ph)PS(ph)PQSVR_			2P	2031450	3195000	3.33307e+06	2.70663e+06	3226100	1473010	382677	890738	1186620	284634	1066498
_KAAS(ph)PSPQSVR_			1P	1.80398e+06	1.22411e+06	901182	2.45767e+06	490644		143951
_KAASPS(ph)PQSVR_			1P	215567
KPSPSESPEPWKPFPAVSPEPR (from Chromosome alignment-maintaining phosphoprotein 1)
_KPS(ph)PSES(ph)PEPWKPFPAVS(ph)PEPR_			3P					227187			69061.5			473922
_KPS(ph)PSES(ph)PEPWKPFPAVSPEPR_			2P	221467	163546	195324	142933	119248	402358		39075			380335
_KPS(ph)PSESPEPWKPFPAVS(ph)PEPR_			2P	89098	74992	96675	87319	83619	179082
_KPS(ph)PSESPEPWKPFPAVSPEPR_			1P	398197	147812	196933	274448
QQDLHLESPQRQPEYSPESPR (from Coiled-coil domain-containing protein 86)
_QQDLHLES(ph)PQRQPEY(ph)S(ph)PESPR_			3P										127424
_QQDLHLES(ph)PQRQPEY(ph)SPES(ph)PR_			3P								178768
_QQDLHLES(ph)PQRQPEYS(ph)PESPR_			2P		1828133	2056767	2013150	2034320
_QQDLHLES(ph)PQRQPEYSPES(ph)PR_			2P								222040
_QQDLHLES(ph)PQRQPEYSPESPR_			1P	506048	215490	270638	472635
SPHQLLSPSSFSPSATPSQK (from DNA polymerase alpha subunit B)
_S(ph)PHQLLS(ph)PSSFS(ph)PSATPSQK_			3P								28002		26503
_S(ph)PHQLLSPSSFS(ph)PSATPSQK_			2P		79163	91056	70519
_S(ph)PHQLLSPSSFSPSATPSQK_			1P	202735	151055	181080	196037			26767
